# Supplementary material for: Twisting versus Delocalization in CAAC‐ and NHC‐Stabilized Boron‐Based Biradicals: The Roles of Sterics and Electronics
Source: PubMed Central journal article supplement — Chemistry. 2021 Jan 25;27(16):5160–70. doi: 10.1002/chem.202004619 (PMC8048672; doi:10.1002/chem.202004619), 2021-01-25
Supplement: CHEM-27-5160-s001.pdf [file CHEM-27-5160-s001.pdf]

# Chemistry–A European Journal

Supporting Information

## **Twisting versus Delocalization in CAAC- and NHC-Stabilized Boron-Based Biradicals: The Roles of Sterics and Electronics**

Paul Schmid,<sup>[a]</sup> Felipe Fantuzzi,<sup>[a, b, c]</sup> Jonas Klopf,<sup>[a]</sup> Niklas B. Schröder,<sup>[a]</sup> Rian D. Dewhurst,<sup>[b, c]</sup>  
Holger Braunschweig,<sup>[b, c]</sup> Volker Engel,<sup>[a]</sup> and Bernd Engels\*<sup>[a]</sup>

I. Further information on CAAC-stabilized compounds .....S4

**Equation S1:** Determination of the open-shell character  $y_i$  by following equations of Yamaguchi,<sup>1</sup> where  $nHOMO - i$  and  $nLUMO + i$  are the occupation numbers and  $T_i$  is the orbital overlap of the HOMO- $i$  and LUMO+ $i$  natural orbitals. A perfect biradical has a  $y_i$  value of 1 and a closed shell system a  $y_i$  value of 0. ....S4

**Table S1:** Selected bond distances within the characterized compounds ( $S_0$ ). Distances are given in Å. The enumeration of the centers is given in Scheme 1. ....S4

**Table S2:** Selected bond angles within the characterized compounds ( $S_0$ ). The enumeration of the centers is given in Scheme 1. ....S5

**Table S3:** Sum of bonding angles around  $C^2$  and  $C^3$ . The unexpected  $\langle S^2 \rangle$  value for **CAAC\_Full\_C<sub>2</sub>H<sub>5</sub>\_Cl** (planar) and **CAAC\_Full\_CH<sub>3</sub>\_Cl** (planar) result from pyramidalization of the  $C^2$  and the  $C^3$  centers.  $S$  always gives the first atom center of the substituent  $R^3$ . ....S6

**Table S4:** Selected dihedral angles for the ground state of the fully optimized CAAC structures. The enumeration is given in Scheme 1. ....S6

**Table S5:** Selected calculated interatomic distances  $R_{calc}$  [Å] and the dihedral angle  $\angle C1B1C2S$  [°] of the characterized compounds ( $S_0$ ).  $S$  gives the first atom center of the substituent  $R^3$ . The difference between the calculated atomic distance  $R_{calc}$  and the sum of the van der Waals radii  $R_{v.d.W.-r.}$  is defined as  $R_{diff}$  [Å]. The abbreviations of  $H_{bridge}$ ,  $H_{CAAC}$ ,  $H_{Dip}$  and  $H_{Nitrogen}$  are  $H_b$ ,  $H_C$ ,  $H_D$  and  $H_N$ . The interatomic distances for the full and model system (twisted/planar) are shown by colored lines in Figure S1. ....S7

**Figure S1:** Sketch of the color-coded atomic distances summarized in Table S5 using the full system **CAAC\_Full\_CH<sub>3</sub>\_Cl** (left) and the model system **CAAC\_Mod\_CH<sub>3</sub>\_Cl** (right) as examples. The two upper pictures show the twisted structures while the lower pictures give the planar structures. ....S8

**Figure S2:** SOMO orbitals of the twisted structure of the systems **CAAC\_Mod\_R<sup>3</sup>\_X** with  $R^3 = C_2H_5, CH_3, H$  and  $X = Cl, H$  and of the diborane obtained from UMN12L/6-311G(d,p) computations for the lowest triplet state. S-T gaps are obtained from NEVPT2/cc-pVDZ computations. A positive value means a singlet ground state. ....S9

**Figure S3:** SOMO orbitals of the twisted structure of the systems **CAAC\_Mod\_R<sup>3</sup>\_X** with  $R^3 = C_2H_5, CH_3, H$  and  $X = Cl, H$  and of the diborane obtained from CASSCF(4,6)/cc-pVDZ computations for the lowest triplet state. S-T gaps are obtained from NEVPT2/cc-pVDZ computations. A positive value means a singlet ground state. .... S10

**Figure S4:** SOMO orbitals of the twisted structure of the systems **CAAC\_Mod\_R<sup>3</sup>\_X** with  $R^3 = C_2H_5, CH_3, H$  and  $X = Cl, H$  and of the diborane obtained from CASSCF(4,6)/cc-pVDZ computations for the lowest singlet state. S-T gaps obtained from NEVPT2/cc-pVDZ computations. A positive value means a singlet ground state. .... S11

II. Further information on the saturated hydrocarbon-bridged model compounds.. S12

**Figure S5:** CASCI(2,2) triplet MOs of the planar and twisted structure of the saturated hydrocarbon-bridged diborenes together with the orbital energies. The S-T gaps [kcal/mol] are computed with the CASCI(2,2)/cc-pVDZ and the NEVPT2/cc-pVDZ approach. A negative sign indicates a triplet ground state. .... S12

**Table S6:** CASCI(2,2) wavefunction for the lowest singlet state of the planar and the twisted structure of the saturated hydrocarbon-bridged diborenes. The structures and the orbital

|                                                                                                                                                                                                                                                                                                                                                                                                                                                                                                                                                                                                                                                                                                                                                                                                                                                                                                                                                                                                                                                                                                                                                                  |     |
|------------------------------------------------------------------------------------------------------------------------------------------------------------------------------------------------------------------------------------------------------------------------------------------------------------------------------------------------------------------------------------------------------------------------------------------------------------------------------------------------------------------------------------------------------------------------------------------------------------------------------------------------------------------------------------------------------------------------------------------------------------------------------------------------------------------------------------------------------------------------------------------------------------------------------------------------------------------------------------------------------------------------------------------------------------------------------------------------------------------------------------------------------------------|-----|
| shapes are depicted in Figure S5. The occupation pattern gives the occupation of SOMO1 and SOMO2 within the given determinants. The column 2 0 contains the coefficients $c_i$ and its square $c_i^2$ of the determinant in which the SOMO1 is doubly occupied while SOMO2 is empty. For 1 1 both orbitals are singly occupied, etc.....                                                                                                                                                                                                                                                                                                                                                                                                                                                                                                                                                                                                                                                                                                                                                                                                                         | S13 |
| <b>Description of the orbital shapes and the related wavefunctions of the saturated hydrocarbon-bridged compounds</b> .....                                                                                                                                                                                                                                                                                                                                                                                                                                                                                                                                                                                                                                                                                                                                                                                                                                                                                                                                                                                                                                      | S13 |
| <b>III. Discussion of the 4*4 CI model to describe biradicaloid systems</b> .....                                                                                                                                                                                                                                                                                                                                                                                                                                                                                                                                                                                                                                                                                                                                                                                                                                                                                                                                                                                                                                                                                | S14 |
| <b>Scheme S1:</b> Principle determinants and states arising if two electrons are distributed in two spatial orbitals $\phi_1$ and $\phi_2$ . In the following we always assume that both orbitals are orthogonal to each other.....                                                                                                                                                                                                                                                                                                                                                                                                                                                                                                                                                                                                                                                                                                                                                                                                                                                                                                                              | S14 |
| <b>Scheme S2:</b> Electronic wavefunctions and energies of the states obtained from the six determinants depicted in Scheme S1.....                                                                                                                                                                                                                                                                                                                                                                                                                                                                                                                                                                                                                                                                                                                                                                                                                                                                                                                                                                                                                              | S15 |
| <b>Scheme S3:</b> Relationship between localized MOs A, B and delocalized MOs a, b. The left-hand side shows how localized orbitals A and B could be obtained from the delocalized orbitals a, b given by the CASCI(2,2)/cc-pVDZ computations of the planar form. The orbital A would be located at the left part of the molecule, B would be located at the right side. The right-hand side indicates how delocalized orbitals a, b could be obtained from the localized orbitals A and B given by the CASCI(2,2) computations of the twisted form. Orbital a gives the bonding linear combination of the two localized $\pi$ systems, while b gives the antibonding form.....                                                                                                                                                                                                                                                                                                                                                                                                                                                                                  | S15 |
| <b>Scheme S4:</b> The quantities characterizing the interactions in the 4 * 4 CI model description of two electrons contained in two orthogonal localized orbitals A and B, i.e. their overlap $SAB = A1B1d\tau1$ vanishes. ....                                                                                                                                                                                                                                                                                                                                                                                                                                                                                                                                                                                                                                                                                                                                                                                                                                                                                                                                 | S16 |
| <b>Scheme S5:</b> The quantities characterizing the interactions in the 4 * 4 CI model description of two electrons contained in two orthogonal delocalized orbitals a and b, i.e. their overlap $Sab = a1b1d\tau1$ vanishes.....                                                                                                                                                                                                                                                                                                                                                                                                                                                                                                                                                                                                                                                                                                                                                                                                                                                                                                                                | S16 |
| <b>IV. Further information on the NHC-stabilized systems</b> .....                                                                                                                                                                                                                                                                                                                                                                                                                                                                                                                                                                                                                                                                                                                                                                                                                                                                                                                                                                                                                                                                                               | S18 |
| <b>Scheme S6:</b> Sketch of the characterized NHC compounds. In the naming of the compounds $R^1 = \text{Dip}$ are denoted <i>Full</i> while $R^1 = \text{H}$ is denoted <i>Mod</i> . The substituents $R^2$ and X are explicitly given. For examples the compound with $R^1 = \text{Dip}$ , $R^2 = \text{CH}_3$ and $X = \text{Cl}$ is abbreviated as <b>NHC_Full_CH<sub>3</sub>_Cl</b> while the one with $R^1 = \text{H}$ , $R^2 = \text{H}$ and $X = \text{H}$ is called <b>NHC_Mod_H_H</b> . In the planar geometry the dihedral angles $\angle N^1C^1B^1C^2$ , $\angle C^1B^1C^2C^3$ , $\angle B^1C^2C^3B^2$ , $\angle C^2C^3B^2C^4$ , and $\angle C^3B^2C^4N^2$ are equal to $180^\circ$ . For the twisted geometry, the dihedral angles $\angle N^1C^1B^1C^2$ , $\angle B^1C^2C^3B^2$ , and $\angle C^3B^2C^4N^2$ are equal to $180^\circ$ while $\angle C^1B^1C^2C^3 = -90^\circ$ and $\angle C^2C^3B^2C^4 = 90^\circ$ . Geometries obtained by optimization without constraints are denoted “full opt.”. The corresponding dihedral angles for the fully optimized structures are given in Table S9. For more information see main text and below..... | S18 |
| <b>Table S7:</b> Selected bond distances within the characterized NHC stabilized compounds ( $S_0$ ). Distances are given in Å. The enumeration of the centers is given in Scheme S6.....                                                                                                                                                                                                                                                                                                                                                                                                                                                                                                                                                                                                                                                                                                                                                                                                                                                                                                                                                                        | S19 |
| <b>Table S8:</b> Selected bond angles of the characterized NHC-stabilized compounds ( $S_0$ ). The enumeration of the centers is given in Scheme S6.....                                                                                                                                                                                                                                                                                                                                                                                                                                                                                                                                                                                                                                                                                                                                                                                                                                                                                                                                                                                                         | S20 |
| <b>Table S9:</b> Selected dihedral angles for the ground state of the fully optimized NHC structures. The enumeration is given in Scheme S6. ....                                                                                                                                                                                                                                                                                                                                                                                                                                                                                                                                                                                                                                                                                                                                                                                                                                                                                                                                                                                                                | S21 |
| <b>Table S10:</b> Computed NHC-stabilized compounds. Relative energies [kcal/mol] with respect to the $S_0$ state of the planar structure of the characterized compounds ( $\Delta E_{p \rightarrow t}$ ). $\Delta E_{p \rightarrow t}$ is positive if the planar structure is more stable.....                                                                                                                                                                                                                                                                                                                                                                                                                                                                                                                                                                                                                                                                                                                                                                                                                                                                  | S22 |
| <b>V. Comparison of planar structures of CAAC- and NHC-stabilized compounds</b> .....                                                                                                                                                                                                                                                                                                                                                                                                                                                                                                                                                                                                                                                                                                                                                                                                                                                                                                                                                                                                                                                                            | S24 |

**Table S11:** Influence of cyclic carbenes CAAC and NHC, respectively, for selected model systems of  $C_2R_2$ -bridged and non-bridged diborenes.  $\Delta E_{p \rightarrow t}$  gives the relative energy between the planar and the twisted structure. A negative sign would indicate a twisted structure as a ground state. In the twisted structure of the  $C_2R_2$ -bridged diborenes, the  $C_2R_2$ -bridge is rotated by  $90^\circ$  with respect to the boron / cyclic carbene planes. For the twisted diborenes both boron / carbene moieties are rotated by  $90^\circ$  with respect to each other.  $\Delta E_{ST}$  gives the S-T gap for the planar structure. A positive sign indicates a singlet ground state. For the bridged systems we employed NEVPT2(4,6)/cc-pVDZ while NEVPT2(2,4)/cc-pVDZ were used for the diborenes. The singlet orbital energies are taken from UMN12L computations, which show nearly identical trends and orbitals..... S24

**Table S12:** Reaction energies  $\Delta E_{\text{Reac.}}$  of the exchange reaction replacing CAAC ligands by NHC ligands. (see Scheme 2 of main text) ..... S26

**VI. References** ..... S26

**VII. XYZ-coordinates of all *full* systems optimized with UMN12L/6-311G(d,p)**..... S27

## I. Further information on CAAC-stabilized compounds

**Equation S1:** Determination of the open-shell character  $y_i$  by following equations of Yamaguchi,<sup>[1]</sup> where  $n_{HOMO-i}$  and  $n_{LUMO+i}$  are the occupation numbers and  $T_i$  is the orbital overlap of the HOMO- $i$  and LUMO+ $i$  natural orbitals. A perfect biradical has a  $y_i$  value of 1 and a closed shell system a  $y_i$  value of 0.

$$y_i = 1 - \frac{2T_i}{1+T_i^2} \quad (1)$$

$$T_i = \frac{n_{HOMO-i} - n_{LUMO+i}}{2} \quad (2)$$

**Table S1:** Selected bond distances within the characterized compounds ( $S_0$ ). Distances are given in Å. The enumeration of the centers is given in Scheme 1.

| Comp.                                                      | $R_{N^1C^1}$ | $R_{C^1B^1}$ | $R_{B^1C^2}$ | $R_{C^2C^3}$ | $R_{C^3B^2}$ | $R_{B^2C^4}$ | $R_{C^4N^2}$ |
|------------------------------------------------------------|--------------|--------------|--------------|--------------|--------------|--------------|--------------|
| Full system with bulky substituents                        |              |              |              |              |              |              |              |
| CAAC_Full_C <sub>2</sub> H <sub>5</sub> _Cl (crystal data) | 1.37         | 1.50         | 1.59         | 1.34         | 1.59         | 1.50         | 1.37         |
| CAAC_Full_C <sub>2</sub> H <sub>5</sub> _Cl (full opt.)    | 1.36         | 1.52         | 1.57         | 1.35         | 1.57         | 1.52         | 1.36         |
| CAAC_Full_C <sub>2</sub> H <sub>5</sub> _Cl (twisted)      | 1.36         | 1.52         | 1.57         | 1.35         | 1.57         | 1.52         | 1.36         |
| CAAC_Full_C <sub>2</sub> H <sub>5</sub> _Cl (planar)       | 1.36         | 1.54         | 1.57         | 1.38         | 1.57         | 1.54         | 1.36         |
| CAAC_Full_CH <sub>3</sub> _Cl (crystal data)               | 1.37         | 1.51         | 1.60         | 1.35         | 1.60         | 1.51         | 1.37         |
| CAAC_Full_CH <sub>3</sub> _Cl (full opt.)                  | 1.36         | 1.52         | 1.57         | 1.35         | 1.57         | 1.52         | 1.36         |
| CAAC_Full_CH <sub>3</sub> _Cl (twisted)                    | 1.36         | 1.52         | 1.57         | 1.35         | 1.57         | 1.52         | 1.36         |
| CAAC_Full_CH <sub>3</sub> _Cl (planar)                     | 1.37         | 1.55         | 1.55         | 1.39         | 1.55         | 1.55         | 1.37         |
| CAAC_Full_H_Cl (full opt.)                                 | 1.34         | 1.54         | 1.49         | 1.40         | 1.49         | 1.54         | 1.34         |
| CAAC_Full_H_Cl (twisted)                                   | 1.36         | 1.51         | 1.56         | 1.34         | 1.56         | 1.51         | 1.36         |
| CAAC_Full_H_Cl (planar)                                    | 1.34         | 1.54         | 1.49         | 1.40         | 1.49         | 1.54         | 1.34         |
| CAAC_Full_C <sub>2</sub> H <sub>5</sub> _H (full opt.)     | 1.36         | 1.52         | 1.57         | 1.36         | 1.57         | 1.52         | 1.35         |
| CAAC_Full_C <sub>2</sub> H <sub>5</sub> _H (twisted)       | 1.36         | 1.52         | 1.58         | 1.35         | 1.58         | 1.52         | 1.36         |
| CAAC_Full_C <sub>2</sub> H <sub>5</sub> _H (planar)        | 1.36         | 1.55         | 1.52         | 1.44         | 1.52         | 1.55         | 1.36         |
| CAAC_Full_CH <sub>3</sub> _H (full opt.)                   | 1.36         | 1.52         | 1.57         | 1.35         | 1.57         | 1.52         | 1.36         |
| CAAC_Full_CH <sub>3</sub> _H (twisted)                     | 1.35         | 1.52         | 1.57         | 1.35         | 1.57         | 1.52         | 1.35         |
| CAAC_Full_CH <sub>3</sub> _H (planar)                      | 1.35         | 1.55         | 1.51         | 1.44         | 1.51         | 1.55         | 1.35         |
| CAAC_Full_H_H (full opt.)                                  | 1.34         | 1.53         | 1.49         | 1.41         | 1.49         | 1.53         | 1.34         |
| CAAC_Full_H_H (twisted)                                    | 1.36         | 1.52         | 1.56         | 1.35         | 1.56         | 1.52         | 1.36         |
| CAAC_Full_H_H (planar)                                     | 1.34         | 1.53         | 1.49         | 1.41         | 1.49         | 1.53         | 1.34         |
| Model compound without bulky substituents                  |              |              |              |              |              |              |              |
| CAAC_Mod_C <sub>2</sub> H <sub>5</sub> _Cl (twisted)       | 1.35         | 1.50         | 1.56         | 1.35         | 1.56         | 1.50         | 1.35         |
| CAAC_Mod_C <sub>2</sub> H <sub>5</sub> _Cl (planar)        | 1.34         | 1.56         | 1.51         | 1.43         | 1.51         | 1.56         | 1.34         |
| CAAC_Mod_CH <sub>3</sub> _Cl (twisted)                     | 1.35         | 1.50         | 1.56         | 1.35         | 1.56         | 1.50         | 1.35         |
| CAAC_Mod_CH <sub>3</sub> _Cl (planar)                      | 1.34         | 1.54         | 1.51         | 1.43         | 1.51         | 1.54         | 1.34         |
| CAAC_Mod_H_Cl (twisted)                                    | 1.35         | 1.50         | 1.56         | 1.34         | 1.56         | 1.50         | 1.35         |
| CAAC_Mod_H_Cl (planar)                                     | 1.33         | 1.52         | 1.48         | 1.40         | 1.48         | 1.52         | 1.33         |
| CAAC_Mod_C <sub>2</sub> H <sub>5</sub> _H (twisted)        | 1.35         | 1.51         | 1.57         | 1.35         | 1.57         | 1.51         | 1.35         |
| CAAC_Mod_C <sub>2</sub> H <sub>5</sub> _H (planar)         | 1.34         | 1.53         | 1.50         | 1.43         | 1.50         | 1.53         | 1.34         |
| CAAC_Mod_CH <sub>3</sub> _H (twisted)                      | 1.35         | 1.51         | 1.57         | 1.35         | 1.57         | 1.51         | 1.35         |
| CAAC_Mod_CH <sub>3</sub> _H (planar)                       | 1.34         | 1.53         | 1.50         | 1.43         | 1.50         | 1.53         | 1.34         |
| CAAC_Mod_H_H (twisted)                                     | 1.35         | 1.51         | 1.56         | 1.35         | 1.56         | 1.51         | 1.35         |
| CAAC_Mod_H_H (planar)                                      | 1.34         | 1.52         | 1.49         | 1.40         | 1.49         | 1.52         | 1.34         |

**Table S2:** Selected bond angles within the characterized compounds ( $S_0$ ). The enumeration of the centers is given in Scheme 1.

| Comp.                                                      | $\sphericalangle N^1 C^1 B^1$ | $\sphericalangle C^1 B^1 C^2$ | $\sphericalangle B^1 C^2 C^3$ | $\sphericalangle C^2 C^3 B^2$ | $\sphericalangle C^3 B^2 C^4$ | $\sphericalangle B^2 C^4 N^2$ |
|------------------------------------------------------------|-------------------------------|-------------------------------|-------------------------------|-------------------------------|-------------------------------|-------------------------------|
| Full system with bulky substituents                        |                               |                               |                               |                               |                               |                               |
| CAAC_Full_C <sub>2</sub> H <sub>5</sub> _Cl (crystal data) | 129.2                         | 126.6                         | 121.1                         | 121.1                         | 126.6                         | 129.2                         |
| CAAC_Full_C <sub>2</sub> H <sub>5</sub> _Cl (full opt.)    | 129.0                         | 124.8                         | 120.0                         | 120.0                         | 124.8                         | 129.0                         |
| CAAC_Full_C <sub>2</sub> H <sub>5</sub> _Cl (twisted)      | 128.9                         | 125.0                         | 120.1                         | 120.1                         | 125.0                         | 128.9                         |
| CAAC_Full_C <sub>2</sub> H <sub>5</sub> _Cl (planar)       | 126.7                         | 124.9                         | 125.3                         | 125.3                         | 124.9                         | 126.7                         |
| CAAC_Full_CH <sub>3</sub> _Cl (crystal data)               | 128.9                         | 126.3                         | 121.9                         | 121.9                         | 126.3                         | 128.9                         |
| CAAC_Full_CH <sub>3</sub> _Cl (full opt.)                  | 128.5                         | 124.6                         | 124.2                         | 124.2                         | 124.6                         | 128.5                         |
| CAAC_Full_CH <sub>3</sub> _Cl (twisted)                    | 128.2                         | 126.6                         | 124.1                         | 124.1                         | 126.6                         | 128.2                         |
| CAAC_Full_CH <sub>3</sub> _Cl (planar)                     | 124.9                         | 124.6                         | 126.0                         | 126.0                         | 124.6                         | 124.9                         |
| CAAC_Full_H_Cl (full opt.)                                 | 127.5                         | 121.2                         | 126.3                         | 126.3                         | 121.2                         | 127.5                         |
| CAAC_Full_H_Cl (twisted)                                   | 127.7                         | 125.3                         | 126.5                         | 126.5                         | 125.3                         | 127.7                         |
| CAAC_Full_H_Cl (planar)                                    | 127.8                         | 121.0                         | 126.7                         | 126.7                         | 121.0                         | 127.8                         |
| CAAC_Full_C <sub>2</sub> H <sub>5</sub> _H (full opt.)     | 123.9                         | 126.0                         | 120.1                         | 124.2                         | 124.2                         | 124.0                         |
| CAAC_Full_C <sub>2</sub> H <sub>5</sub> _H (twisted)       | 124.3                         | 124.1                         | 122.2                         | 122.2                         | 124.1                         | 124.3                         |
| CAAC_Full_C <sub>2</sub> H <sub>5</sub> _H (planar)        | 118.1                         | 134.1                         | 120.7                         | 120.7                         | 134.1                         | 118.1                         |
| CAAC_Full_CH <sub>3</sub> _H (full opt.)                   | 123.3                         | 126.5                         | 126.5                         | 126.5                         | 126.5                         | 123.3                         |
| CAAC_Full_CH <sub>3</sub> _H (twisted)                     | 123.4                         | 126.5                         | 125.7                         | 125.7                         | 126.5                         | 123.4                         |
| CAAC_Full_CH <sub>3</sub> _H (planar)                      | 118.7                         | 133.3                         | 120.5                         | 120.5                         | 133.3                         | 118.7                         |
| CAAC_Full_H_H (full opt.)                                  | 123.2                         | 123.5                         | 124.1                         | 124.1                         | 123.5                         | 123.2                         |
| CAAC_Full_H_H (twisted)                                    | 123.9                         | 124.8                         | 127.1                         | 127.0                         | 124.7                         | 123.9                         |
| CAAC_Full_H_H (planar)                                     | 123.0                         | 123.9                         | 124.0                         | 124.0                         | 123.9                         | 123.0                         |
| Model compound without bulky substituents                  |                               |                               |                               |                               |                               |                               |
| CAAC_Mod_C <sub>2</sub> H <sub>5</sub> _Cl (twisted)       | 126.4                         | 121.6                         | 122.3                         | 122.3                         | 121.6                         | 126.4                         |
| CAAC_Mod_C <sub>2</sub> H <sub>5</sub> _Cl (planar)        | 120.1                         | 126.8                         | 129.9                         | 129.9                         | 126.8                         | 120.1                         |
| CAAC_Mod_CH <sub>3</sub> _Cl (twisted)                     | 126.3                         | 123.5                         | 123.4                         | 123.4                         | 123.5                         | 126.3                         |
| CAAC_Mod_CH <sub>3</sub> _Cl (planar)                      | 121.7                         | 125.2                         | 127.9                         | 127.9                         | 125.2                         | 121.7                         |
| CAAC_Mod_H_Cl (twisted)                                    | 125.7                         | 123.9                         | 125.3                         | 125.3                         | 123.9                         | 125.7                         |
| CAAC_Mod_H_Cl (planar)                                     | 124.9                         | 121.7                         | 127.4                         | 127.4                         | 121.7                         | 124.9                         |
| CAAC_Mod_C <sub>2</sub> H <sub>5</sub> _H (twisted)        | 126.3                         | 117.7                         | 123.6                         | 123.6                         | 117.7                         | 126.3                         |
| CAAC_Mod_C <sub>2</sub> H <sub>5</sub> _H (planar)         | 118.5                         | 126.9                         | 123.5                         | 123.5                         | 126.9                         | 118.5                         |
| CAAC_Mod_CH <sub>3</sub> _H (twisted)                      | 126.3                         | 119.3                         | 125.2                         | 125.2                         | 119.3                         | 126.3                         |
| CAAC_Mod_CH <sub>3</sub> _H (planar)                       | 118.9                         | 127.2                         | 122.3                         | 122.3                         | 127.2                         | 118.9                         |
| CAAC_Mod_H_H (twisted)                                     | 125.3                         | 120.8                         | 127.0                         | 127.0                         | 120.8                         | 125.3                         |
| CAAC_Mod_H_H (planar)                                      | 124.7                         | 119.0                         | 126.6                         | 126.6                         | 119.0                         | 124.7                         |

**Table S3:** Sum of bonding angles around C<sup>2</sup> and C<sup>3</sup>. The unexpected <S<sup>2</sup>> value for **CAAC\_Full\_C<sub>2</sub>H<sub>5</sub>Cl** (planar) and **CAAC\_Full\_CH<sub>3</sub>Cl** (planar) result from pyramidalization of the C<sup>2</sup> and the C<sup>3</sup> centers. *S* always gives the first atom center of the substituent R<sup>3</sup>.

| Comp.                                                        | $\angle B^1C^2S$ | $\angle SC^2C^3$ | $\angle B^1C^2C^3$ | $\angle SC^3B^2$ | $\angle C^2C^3S$ | $\angle C^2C^3B^2$ |
|--------------------------------------------------------------|------------------|------------------|--------------------|------------------|------------------|--------------------|
| Full system with bulky substituents                          |                  |                  |                    |                  |                  |                    |
| <b>CAAC_Full_C<sub>2</sub>H<sub>5</sub>Cl</b> (crystal data) | 119.2            | 119.6            | 121.1              | 119.2            | 119.6            | 121.1              |
| <b>CAAC_Full_C<sub>2</sub>H<sub>5</sub>Cl</b> (full opt.)    | 119.4            | 120.4            | 120.0              | 119.4            | 120.4            | 120.0              |
| <b>CAAC_Full_C<sub>2</sub>H<sub>5</sub>Cl</b> (twisted)      | 119.5            | 120.4            | 120.1              | 119.5            | 120.4            | 120.1              |
| <b>CAAC_Full_C<sub>2</sub>H<sub>5</sub>Cl</b> (planar)       | 108.9            | 112.4            | 125.3              | 108.9            | 112.4            | 125.3              |
| <b>CAAC_Full_CH<sub>3</sub>Cl</b> (crystal data)             | 117.0            | 120.7            | 121.9              | 117.0            | 120.7            | 121.9              |
| <b>CAAC_Full_CH<sub>3</sub>Cl</b> (full opt.)                | 114.0            | 121.1            | 124.2              | 114.0            | 121.1            | 124.2              |
| <b>CAAC_Full_CH<sub>3</sub>Cl</b> (twisted)                  | 114.0            | 121.0            | 124.1              | 114.0            | 121.0            | 124.1              |
| <b>CAAC_Full_CH<sub>3</sub>Cl</b> (planar)                   | 110.3            | 114.9            | 126.0              | 110.3            | 114.9            | 126.0              |
| <b>CAAC_Full_HCl</b> (full opt.)                             | 119.6            | 114.0            | 126.3              | 119.6            | 114.0            | 126.3              |
| <b>CAAC_Full_HCl</b> (twisted)                               | 116.4            | 116.3            | 126.5              | 116.4            | 116.3            | 126.5              |
| <b>CAAC_Full_HCl</b> (planar)                                | 119.2            | 113.9            | 126.7              | 119.2            | 113.9            | 126.7              |
| <b>CAAC_Full_C<sub>2</sub>H<sub>5</sub>H</b> (full opt.)     | 120.3            | 119.5            | 120.1              | 117.6            | 118.1            | 124.2              |
| <b>CAAC_Full_C<sub>2</sub>H<sub>5</sub>H</b> (twisted)       | 118.5            | 119.3            | 122.2              | 118.5            | 119.3            | 122.2              |
| <b>CAAC_Full_C<sub>2</sub>H<sub>5</sub>H</b> (planar)        | 120.7            | 118.2            | 120.7              | 120.7            | 118.2            | 120.7              |
| <b>CAAC_Full_CH<sub>3</sub>H</b> (full opt.)                 | 113.0            | 120.2            | 126.5              | 113.0            | 120.2            | 126.5              |
| <b>CAAC_Full_CH<sub>3</sub>H</b> (twisted)                   | 113.4            | 120.0            | 125.7              | 113.4            | 120.0            | 125.7              |
| <b>CAAC_Full_CH<sub>3</sub>H</b> (planar)                    | 122.4            | 116.6            | 120.5              | 122.4            | 116.6            | 120.5              |
| <b>CAAC_Full_HH</b> (full opt.)                              | 122.7            | 113.2            | 124.1              | 122.7            | 113.2            | 124.1              |
| <b>CAAC_Full_HH</b> (twisted)                                | 117.1            | 115.2            | 127.1              | 117.1            | 115.3            | 127.0              |
| <b>CAAC_Full_HH</b> (planar)                                 | 122.8            | 113.1            | 124.0              | 122.8            | 113.1            | 124.0              |

**Table S4:** Selected dihedral angles for the ground state of the fully optimized CAAC structures. The enumeration is given in Scheme 1.

| Comp.                                                     | $\angle N^1C^1B^1C^2$ | $\angle C^1B^1C^2C^3$ | $\angle B^1C^2C^3B^2$ | $\angle C^2C^3B^2C^4$ | $\angle C^3B^2C^4N^2$ |
|-----------------------------------------------------------|-----------------------|-----------------------|-----------------------|-----------------------|-----------------------|
| Full systems with bulky substituents                      |                       |                       |                       |                       |                       |
| <b>CAAC_Full_C<sub>2</sub>H<sub>5</sub>Cl</b> (cry. data) | 178.1                 | -96.8                 | 180.0                 | 96.8                  | -178.1                |
| <b>CAAC_Full_C<sub>2</sub>H<sub>5</sub>Cl</b> (full opt.) | 174.5                 | -97.0                 | 180.0                 | 97.0                  | -174.5                |
| <b>CAAC_Full_CH<sub>3</sub>Cl</b> (cry. data)             | -169.6                | -97.7                 | 180.0                 | 97.7                  | 169.6                 |
| <b>CAAC_Full_CH<sub>3</sub>Cl</b> (full opt.)             | -163.6                | -99.4                 | 180.0                 | 99.4                  | 163.6                 |
| <b>CAAC_Full_HCl</b> (full opt.)                          | -161.0                | 170.3                 | 180.0                 | -170.3                | 161.0                 |
| <b>CAAC_Full_C<sub>2</sub>H<sub>5</sub>H</b> (full opt.)  | 178.4                 | -112.3                | -179.0                | 83.9                  | -179.4                |
| <b>CAAC_Full_CH<sub>3</sub>H</b> (full opt.)              | -173.0                | -86.8                 | 180.0                 | 86.8                  | 173.0                 |
| <b>CAAC_Full_HH</b> (full opt.)                           | -167.7                | 174.8                 | 180.0                 | -174.7                | 167.7                 |

**Table S5:** Selected calculated interatomic distances  $R_{\text{calc.}}$  [Å] and the dihedral angle  $\angle C^1B^1C^2S$  [°] of the characterized compounds ( $S_0$ ).  $S$  gives the first atom center of the substituent  $R^3$ . The difference between the calculated atomic distance  $R_{\text{calc.}}$  and the sum of the van der Waals radii  $R_{\text{v.d.W.-r.}}$  is defined as  $R_{\text{diff.}}$  [Å]. The abbreviations of  $H_{\text{bridge}}$ ,  $H_{\text{CAAC}}$ ,  $H_{\text{Dip}}$  and  $H_{\text{Nitrogen}}$  are  $H_b$ ,  $H_c$ ,  $H_D$  and  $H_N$ . The interatomic distances for the full and model system (twisted/planar) are shown by colored lines in Figure S1.

| Comp.                                                         | $R_{\text{calc.}}$ |               |           | $R_{\text{diff.}} = R_{\text{calc.}} - R_{\text{v.d.W.-r.}}$ |               |           | Dihedral            |
|---------------------------------------------------------------|--------------------|---------------|-----------|--------------------------------------------------------------|---------------|-----------|---------------------|
|                                                               | Cl- $H_b$          | $H_c$ - $H_b$ | Cl- $H_D$ | Cl- $H_b$                                                    | $H_c$ - $H_b$ | Cl- $H_D$ | $\angle C^1B^1C^2S$ |
|                                                               | purple             | yellow        | red       | purple                                                       | yellow        | red       | -                   |
| Full system with bulky substituents                           |                    |               |           |                                                              |               |           |                     |
| <b>CAAC_Full_C<sub>2</sub>H<sub>5</sub>_Cl</b> (crystal data) | 3.15               | 2.27          | 2.77      | 0.30                                                         | 0.07          | -0.08     | 87.5                |
| <b>CAAC_Full_C<sub>2</sub>H<sub>5</sub>_Cl</b> (full opt.)    | 3.06               | 2.17          | 2.67      | 0.21                                                         | -0.03         | -0.18     | 87.7                |
| <b>CAAC_Full_C<sub>2</sub>H<sub>5</sub>_Cl</b> (twisted)      | 3.04               | 2.13          | 2.68      | 0.19                                                         | -0.07         | -0.17     | 90.3                |
| <b>CAAC_Full_C<sub>2</sub>H<sub>5</sub>_Cl</b> (planar)       | 2.44               | 2.04          | 2.68      | -0.41                                                        | -0.16         | -0.17     | 42.6                |
| <b>CAAC_Full_CH<sub>3</sub>_Cl</b> (crystal data)             | 3.21               | 2.25          | 2.85      | 0.36                                                         | 0.05          | 0.00      | 89.3                |
| <b>CAAC_Full_CH<sub>3</sub>_Cl</b> (full opt.)                | 3.21               | 2.19          | 2.75      | 0.36                                                         | -0.01         | -0.10     | 90.1                |
| <b>CAAC_Full_CH<sub>3</sub>_Cl</b> (twisted)                  | 3.04               | 2.15          | 2.74      | 0.19                                                         | -0.05         | -0.11     | 100.6               |
| <b>CAAC_Full_CH<sub>3</sub>_Cl</b> (planar)                   | 2.68               | 2.18          | 2.63      | -0.17                                                        | -0.02         | -0.22     | 34.6                |
| <b>CAAC_Full_H_Cl</b> (full opt.)                             | 2.66               | 1.98          | 2.67      | -0.19                                                        | -0.22         | -0.18     | -6.2                |
| <b>CAAC_Full_H_Cl</b> (twisted)                               | 3.23               | 2.56          | 2.82      | 0.38                                                         | 0.36          | -0.03     | 101.2               |
| <b>CAAC_Full_H_Cl</b> (planar)                                | 2.65               | 1.90          | 2.70      | -0.20                                                        | -0.30         | -0.15     | 5.0                 |
| Comp.                                                         | $R_{\text{calc.}}$ |               |           | $R_{\text{diff.}} = R_{\text{calc.}} - R_{\text{v.d.W.-r.}}$ |               |           | Dihedral            |
|                                                               | Cl- $H_b$          | $H_c$ - $H_b$ | Cl- $H_N$ | Cl- $H_b$                                                    | $H_c$ - $H_b$ | Cl- $H_N$ | $\angle C^1B^1C^2S$ |
|                                                               | purple             | yellow        | green     | purple                                                       | yellow        | green     | -                   |
| Model compound without bulky substituents                     |                    |               |           |                                                              |               |           |                     |
| <b>CAAC_Mod_C<sub>2</sub>H<sub>5</sub>_Cl</b> (twisted)       | 3.03               | 2.31          | 2.78      | 0.18                                                         | 0.11          | -0.07     | 85.7                |
| <b>CAAC_Mod_C<sub>2</sub>H<sub>5</sub>_Cl</b> (planar)        | 2.38               | 1.79          | 2.28      | -0.47                                                        | -0.41         | -0.57     | -5.4                |
| <b>CAAC_Mod_CH<sub>3</sub>_Cl</b> (twisted)                   | 3.37               | 3.06          | 2.77      | 0.52                                                         | 0.86          | -0.08     | 92.0                |
| <b>CAAC_Mod_CH<sub>3</sub>_Cl</b> (planar)                    | 2.54               | 2.09          | 2.38      | -0.31                                                        | -0.11         | -0.47     | 14.2                |
| <b>CAAC_Mod_H_Cl</b> (twisted)                                | 3.44               | 3.35          | 2.73      | 0.59                                                         | 1.15          | -0.12     | 93.6                |
| <b>CAAC_Mod_H_Cl</b> (planar)                                 | 2.88               | 2.38          | 2.66      | 0.03                                                         | 0.18          | -0.19     | -0.4                |



**Figure S1:** Sketch of the color-coded atomic distances summarized in Table S5 using the full system **CAAC\_Full\_CH<sub>3</sub>\_Cl** (left) and the model system **CAAC\_Mod\_CH<sub>3</sub>\_Cl** (right) as examples. The two upper pictures show the twisted structures while the lower pictures give the planar structures.

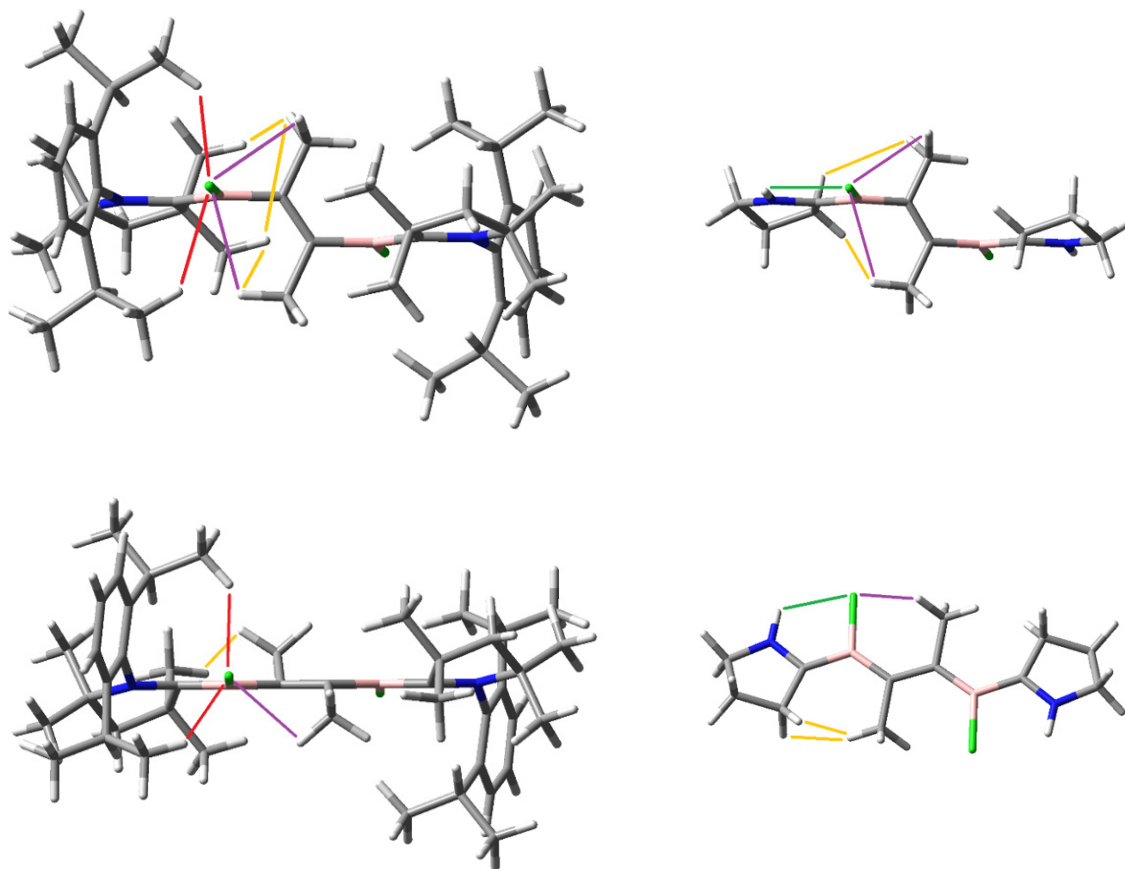

**Figure S2:** SOMO orbitals of the twisted structure of the systems **CAAC\_Mod\_R<sup>3</sup>\_X** with R<sup>3</sup> = C<sub>2</sub>H<sub>5</sub>, CH<sub>3</sub>, H and X = Cl, H and of the diborane obtained from UMN12L/6-311G(d,p) computations for the lowest triplet state. S-T gaps are obtained from NEVPT2/cc-pVDZ computations. A positive value means a singlet ground state.

| Comp.<br>S-T gap                                                                                                                                                      | SOMO1                                                                                        | SOMO2                                                                                          |
|-----------------------------------------------------------------------------------------------------------------------------------------------------------------------|----------------------------------------------------------------------------------------------|------------------------------------------------------------------------------------------------|
| <b>CAAC_Mod_C<sub>2</sub>H<sub>5</sub>_Cl</b><br>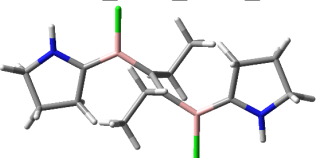<br>$\Delta E_{ST} = 0.4$ kcal/mol  | -88.8<br>   | -84.0<br>   |
| <b>CAAC_Mod_CH<sub>3</sub>_Cl</b><br><br>$\Delta E_{ST} = 0.4$ kcal/mol              | -88.6<br>   | -82.8<br>   |
| <b>CAAC_Mod_H_Cl</b><br><br>$\Delta E_{ST} = -0.1$ kcal/mol                         | -86.6<br>  | -85.8<br>  |
| <b>CAAC_Mod_C<sub>2</sub>H<sub>5</sub>_H</b><br><br>$\Delta E_{ST} = 0.5$ kcal/mol | -84.3<br> | -78.4<br> |
| <b>CAAC_Mod_CH<sub>3</sub>_H</b><br><br>$\Delta E_{ST} = 0.4$ kcal/mol             | -84.1<br> | -76.9<br> |
| <b>CAAC_Mod_H_H</b><br><br>$\Delta E_{ST} = -0.3$ kcal/mol                         | -80.3<br> | -79.6<br> |
| <b>CAAC-Diborene</b><br><br>$\Delta E_{ST} = -0.4$ kcal/mol                        | -78.2<br> | -76.6<br> |

**Figure S3:** SOMO orbitals of the twisted structure of the systems **CAAC\_Mod\_R<sup>3</sup>\_X** with R<sup>3</sup> = C<sub>2</sub>H<sub>5</sub>, CH<sub>3</sub>, H and X = Cl, H and of the diborane obtained from CASSCF(4,6)/cc-pVDZ computations for the lowest triplet state. S-T gaps are obtained from NEVPT2/cc-pVDZ computations. A positive value means a singlet ground state.

| Comp.<br>S-T gap                                                                                                                                                      | SOMO1                                                                                        | SOMO2                                                                                          |
|-----------------------------------------------------------------------------------------------------------------------------------------------------------------------|----------------------------------------------------------------------------------------------|------------------------------------------------------------------------------------------------|
| <b>CAAC_Mod_C<sub>2</sub>H<sub>5</sub>_Cl</b><br>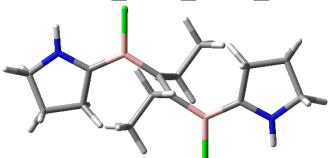<br>$\Delta E_{ST} = 0.4$ kcal/mol  | -53.7<br>   | -48.4<br>   |
| <b>CAAC_Mod_CH<sub>3</sub>_Cl</b><br><br>$\Delta E_{ST} = 0.4$ kcal/mol              | -54.1<br>   | -47.8<br>   |
| <b>CAAC_Mod_H_Cl</b><br><br>$\Delta E_{ST} = -0.1$ kcal/mol                         | -52.9<br>  | -51.5<br>  |
| <b>CAAC_Mod_C<sub>2</sub>H<sub>5</sub>_H</b><br><br>$\Delta E_{ST} = 0.5$ kcal/mol | -45.5<br> | -39.3<br> |
| <b>CAAC_Mod_CH<sub>3</sub>_H</b><br><br>$\Delta E_{ST} = 0.4$ kcal/mol             | -46.1<br> | -38.8<br> |
| <b>CAAC_Mod_H_H</b><br><br>$\Delta E_{ST} = -0.3$ kcal/mol                         | -44.0<br> | -42.3<br> |
| <b>CAAC-Diborene</b><br><br>$\Delta E_{ST} = -0.4$ kcal/mol                        | -47.0<br> | -44.8<br> |

**Figure S4:** SOMO orbitals of the twisted structure of the systems **CAAC\_Mod\_R<sup>3</sup>\_X** with R<sup>3</sup> = C<sub>2</sub>H<sub>5</sub>, CH<sub>3</sub>, H and X = Cl, H and of the diborane obtained from CASSCF(4,6)/cc-pVDZ computations for the lowest singlet state. S-T gaps obtained from NEVPT2/cc-pVDZ computations. A positive value means a singlet ground state.

| Comp.<br>S-T gap                                                                                                                                                      | SOMO1                                                                                        | SOMO2                                                                                          |
|-----------------------------------------------------------------------------------------------------------------------------------------------------------------------|----------------------------------------------------------------------------------------------|------------------------------------------------------------------------------------------------|
| <b>CAAC_Mod_C<sub>2</sub>H<sub>5</sub>_Cl</b><br>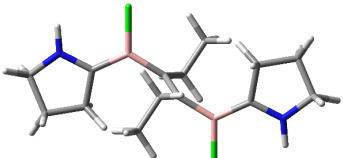<br>$\Delta E_{ST} = 0.4$ kcal/mol  | -55.9<br>   | -46.0<br>   |
| <b>CAAC_Mod_CH<sub>3</sub>_Cl</b><br><br>$\Delta E_{ST} = 0.4$ kcal/mol              | -56.7<br>   | -45.0<br>   |
| <b>CAAC_Mod_H_Cl</b><br><br>$\Delta E_{ST} = -0.1$ kcal/mol                         | -53.5<br>  | -50.9<br>  |
| <b>CAAC_Mod_C<sub>2</sub>H<sub>5</sub>_H</b><br><br>$\Delta E_{ST} = 0.5$ kcal/mol | -48.2<br> | -36.4<br> |
| <b>CAAC_Mod_CH<sub>3</sub>_H</b><br><br>$\Delta E_{ST} = 0.4$ kcal/mol             | -49.1<br> | -35.5<br> |
| <b>CAAC_Mod_H_H</b><br><br>$\Delta E_{ST} = -0.3$ kcal/mol                         | -44.7<br> | -41.6<br> |
| <b>CAAC-Diborene</b><br><br>$\Delta E_{ST} = -0.4$ kcal/mol                        | -50.7<br> | -40.7<br> |

## II. Further information on the saturated hydrocarbon-bridged model compounds

**Figure S5:** CASCI(2,2) triplet MOs of the planar and twisted structure of the saturated hydrocarbon-bridged diborenes together with the orbital energies. The S-T gaps [kcal/mol] are computed with the CASCI(2,2)/cc-pVDZ and the NEVPT2/cc-pVDZ approach. A negative sign indicates a triplet ground state.

| conformer<br>S-T gap in [kcal/mol]:<br>CASCI(2,2) / NEVPT2(2,2)                                                 | SOMO1                                                                                       | SOMO2                                                                                         |
|-----------------------------------------------------------------------------------------------------------------|---------------------------------------------------------------------------------------------|-----------------------------------------------------------------------------------------------|
| <b>CH<sub>2</sub></b>                                                                                           |                                                                                             |                                                                                               |
| 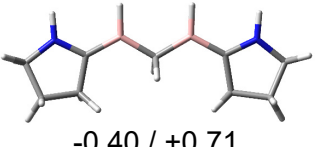<br>-0.40 / +0.71<br>planar    | <br>57.4   | <br>64.1   |
| <br>-0.85 / -0.21<br>twisted   | <br>61.9   | <br>65.3   |
| <b>C<sub>2</sub>H<sub>4</sub></b>                                                                               |                                                                                             |                                                                                               |
| <br>-0.13 / +0.22<br>planar   | <br>51.7  | <br>56.2  |
| <br>-0.21 / -0.05<br>twisted | <br>53.1 | <br>57.5 |
| <b>C<sub>3</sub>H<sub>6</sub></b>                                                                               |                                                                                             |                                                                                               |
| <br>+0.01 / +0.05<br>planar  | <br>49.7 | <br>52.5 |
| <br>-0.04 / 0.00<br>twisted  | <br>50.2 | <br>54.7 |

**Table S6:** CASCI(2,2) wavefunction for the lowest singlet state of the planar and the twisted structure of the saturated hydrocarbon-bridged diborenes. The structures and the orbital shapes are depicted in Figure S5. The occupation pattern gives the occupation of SOMO1 and SOMO2 within the given determinants. The column 2 0 contains the coefficients  $c_i$  and its square  $c_i^2$  of the determinant in which the SOMO1 is doubly occupied while SOMO2 is empty. For 1 1 both orbitals are singly occupied, etc.

| coeff.                                               | occupation pattern |            |               |
|------------------------------------------------------|--------------------|------------|---------------|
|                                                      | 2 0                | 0 2        | 1 1           |
| <b>CH<sub>2</sub>: planar structure</b>              |                    |            |               |
| $c_i$                                                | 0.7388896          | -0.6737217 | -0.01188106   |
| $c_i^2$                                              | 0.54596            | 0.45390    | 0.00014       |
| <b>CH<sub>2</sub>: twisted structure</b>             |                    |            |               |
| $c_i$                                                | 0.6241019          | -0.6000098 | -0.5004848    |
| $c_i^2$                                              | 0.38950            | 0.36001    | 0.25049       |
| <b>C<sub>2</sub>H<sub>4</sub>: planar structure</b>  |                    |            |               |
| $c_i$                                                | 0.7269007          | -0.6867425 | -0.0001753747 |
| $c_i^2$                                              | 0.52838            | 0.47162    | 0.00000       |
| <b>C<sub>2</sub>H<sub>4</sub>: twisted structure</b> |                    |            |               |
| $c_i$                                                | 0.1572038          | -0.1454666 | 0.9767940     |
| $c_i^2$                                              | 0.02471            | 0.02116    | 0.95413       |
| <b>C<sub>3</sub>H<sub>6</sub>: planar structure</b>  |                    |            |               |
| $c_i$                                                | 0.7178663          | -0.6949993 | -0.04054588   |
| $c_i^2$                                              | 0.51533            | 0.48302    | 0.00164       |
| <b>C<sub>3</sub>H<sub>6</sub>: twisted structure</b> |                    |            |               |
| $c_i$                                                | -0.04016355        | 0.03941161 | 0.9984156     |
| $c_i^2$                                              | 0.00161            | 0.00155    | 0.99683       |

### Description of the orbital shapes and the related wavefunctions of the saturated hydrocarbon-bridged compounds

The electronic structures of the singlet states of the saturated hydrocarbon-bridged compounds are characterized by means of the occupation numbers of the SOMOs (Figure S5) and the wavefunctions (Table S6). Obviously, the forms of SOMOs and wavefunctions depend on the conformers. The differences are best seen for the (CH<sub>2</sub>)<sub>3</sub>-bridged compound. For the planar structure, the CASCI(2,2)/cc-pVDZ computation provides orbitals which are delocalized over the whole molecule while orbitals located either on the left or the right B-CAAC unit are calculated for the twisted conformer. Coincidentally, the form of the wavefunction changes. For localized orbitals (twisted form) the lowest-lying singlet state is dominated by one determinant in which both SOMOs are singly occupied. For the planar structure, the orbitals are delocalized and the wavefunction is dominated by two determinants in which either SOMO1 or SOMO2 are doubly occupied. Both determinants have similar coefficients and according to the sign of the coefficients both determinants form a negative linear combination. For the compounds with a (CH<sub>2</sub>)<sub>2</sub> bridge we find the same pattern. The planar structure of the CH<sub>2</sub>-bridged system resembles the other systems. For the twisted conformer the wavefunction is more complicated, however, the MOs are also a mixture of localized and delocalized orbitals. For the interpretation of these data, one has to know how the electronic wavefunctions and the energy order of the various states are related to the shape of the underlying MOs (localized vs. delocalized MOs).



### III. Discussion of the 4\*4 CI model to describe biradicaloid systems

These relationships are explained in the excellent reviews of Bonačić-Koutecký, Koutecký and Michl<sup>[2]</sup> about biradicaloid compounds. As such, we provide only a brief summary and refer the reader to the original papers for more information. If two electrons are distributed in two spatial orbitals, six different determinants can be generated as shown in Scheme S1. The determinants  $\psi_3$  and  $\psi_4$  have to be combined to obtain correct eigenfunctions of the  $S^2$  operator. The determinants  $\psi_5$  and  $\psi_6$  should be combined because they have the same energy if both orbitals are energetically degenerate. With this we obtain six electronic states whose wavefunctions will be abbreviated as  $\Psi_1 - \Psi_6$ . For each of these wavefunctions, the spin and space portions can be separated as shown in Scheme S2. Scheme S2 also gives the  $S_z$  and  $S^2$  quantum numbers  $M_S$  and  $\langle S^2 \rangle$  together with the energies. The data reveal that the three states  $\Psi_1, \Psi_2, \Psi_4$  form the triplet manifold with the  $M_S$  quantum numbers 1, -1 and 0. These states are energetically degenerate. They do not interact with each other because they show different  $M_S$  quantum numbers. They also do not interact with the singlet states if the spin-orbit interaction is neglected. Because the various triplet states do not interact with any other state their energies can simply be obtained by applying the Slater-Condon rules. The Slater-Condon rules reduce matrix elements between determinants to the connected integrals.<sup>[3]</sup> Because we neglect spin-orbit effects we only include the triplet state with  $M_S=0$ . According to its open-shell spatial wavefunction structure we abbreviate it as  $^3|\phi_1\phi_2\rangle$ , in which  $\phi_1$  and  $\phi_2$  give the two degenerate or near-degenerate spatial orbitals. This state also does not interact with the remaining singlet state, but it is of interest to explain why biradical boron species show singlet or triplet ground states. The remaining states,  $\Psi_3, \Psi_5$  and  $\Psi_6$  form three singlet states which interact with each other. According to their spatial forms (Scheme S2) they will be abbreviated as  $^1|\phi_1\phi_2\rangle, ^1|\phi_1^2 - \phi_2^2\rangle$  and  $^1|\phi_1^2 + \phi_2^2\rangle$ .

**Scheme S1:** Principle determinants and states arising if two electrons are distributed in two spatial orbitals  $\phi_1$  and  $\phi_2$ . In the following we always assume that both orbitals are orthogonal to each other.

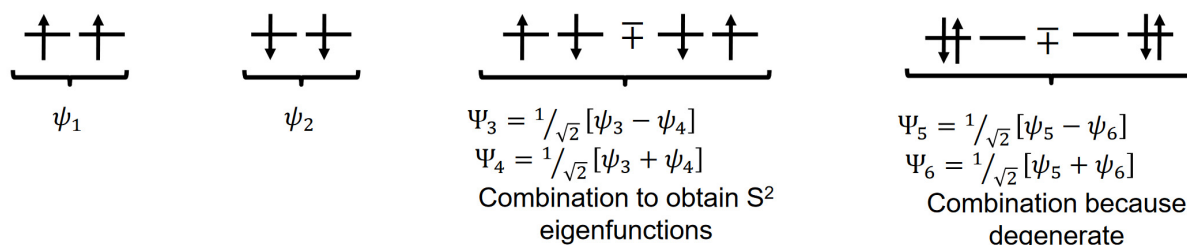

**Scheme S2:** Electronic wavefunctions and energies of the states obtained from the six determinants depicted in Scheme S1.

$$\begin{aligned}
 \psi_1 &= \frac{1}{\sqrt{2}} \underbrace{\alpha(1)\alpha(2)}_{\text{symmetric}} \underbrace{[\phi_1(r_1)\phi_2(r_2) - \phi_1(r_2)\phi_2(r_1)]}_{\text{antisymmetric}} \quad M_S = 1, \langle S^2 \rangle = 2 \\
 \psi_2 &= \frac{1}{\sqrt{2}} \underbrace{\beta(1)\beta(2)}_{\text{symmetric}} \underbrace{[\phi_1(r_1)\phi_2(r_2) - \phi_1(r_2)\phi_2(r_1)]}_{\text{antisymmetric}} \quad M_S = -1, \langle S^2 \rangle = 2 \\
 \Psi_4 &= \frac{1}{2} \left( \underbrace{[\phi_1(r_1)\phi_2(r_2) - \phi_1(r_2)\phi_2(r_1)]}_{\text{antisymmetric}} \cdot \underbrace{[\alpha(1)\beta(2) + \alpha(2)\beta(1)]}_{\text{symmetric}} \right) \quad M_S = 0, \langle S^2 \rangle = 2
 \end{aligned}$$

$$\begin{aligned}
 E(\text{triplets}) &= \\
 &h_{11} + h_{22} \\
 &+ J_{12} - K_{12}
 \end{aligned}$$

$$\begin{aligned}
 \Psi_3 &= \frac{1}{2} \left( \underbrace{[\phi_1(r_1)\phi_2(r_2) + \phi_1(r_2)\phi_2(r_1)]}_{\text{symmetric}} \cdot \underbrace{[\alpha(1)\beta(2) - \alpha(2)\beta(1)]}_{\text{antisymmetric}} \right) \quad h_{11} + h_{22} + J_{12} + K_{12} \\
 \Psi_5 &= \frac{1}{2} \left( \underbrace{[\phi_1(r_1)\phi_1(r_2) - \phi_2(r_1)\phi_2(r_2)]}_{\text{symmetric}} \cdot \underbrace{[\alpha(1)\beta(2) - \alpha(2)\beta(1)]}_{\text{antisymmetric}} \right) \quad h_{11} + h_{22} + \frac{1}{2}(J_{11} + J_{22}) - K_{12} \\
 \Psi_6 &= \frac{1}{2} \left( \underbrace{[\phi_1(r_1)\phi_1(r_2) + \phi_2(r_1)\phi_2(r_2)]}_{\text{symmetric}} \cdot \underbrace{[\alpha(1)\beta(2) - \alpha(2)\beta(1)]}_{\text{antisymmetric}} \right) \quad h_{11} + h_{22} + \frac{1}{2}(J_{11} + J_{22}) + K_{12}
 \end{aligned}$$

**Scheme S3:** Relationship between localized MOs A, B and delocalized MOs a, b. The left-hand side shows how localized orbitals A and B could be obtained from the delocalized orbitals a, b given by the CASCI(2,2)/cc-pVDZ computations of the planar form. The orbital A would be located at the left part of the molecule, B would be located at the right side. The right-hand side indicates how delocalized orbitals a, b could be obtained from the localized orbitals A and B given by the CASCI(2,2) computations of the twisted form. Orbital a gives the bonding linear combination of the two localized  $\pi$  systems, while b gives the antibonding form.

| delocalized orbitals a, b for planar form                                           |                                                                                     | localized orbitals A, B for twisted form                                             |                                                                                       |
|-------------------------------------------------------------------------------------|-------------------------------------------------------------------------------------|--------------------------------------------------------------------------------------|---------------------------------------------------------------------------------------|
| 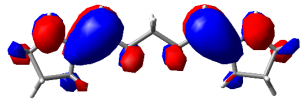 |  |  |  |
| $A = \frac{1}{\sqrt{2}}(a + b)$                                                     |                                                                                     | $a = \frac{1}{\sqrt{2}}(A - B)$                                                      |                                                                                       |
| $B = \frac{1}{\sqrt{2}}(a - b)$                                                     |                                                                                     | $b = \frac{1}{\sqrt{2}}(A + B)$                                                      |                                                                                       |

Depending on the CASCI computations, the involved orbitals  $\phi_1$  and  $\phi_2$  can be localized or delocalized. However, both orbital sets can be transformed into each other as indicated in Scheme S3. As in the reviews of Bonačić-Koutecký, Koutecký and Michl<sup>[2]</sup> we will abbreviate delocalized MOs (Scheme S3 left-hand side) as a and b, while A and B are used for the localized ones (Scheme S3 right-hand side). The corresponding energy expressions as well as the 4\*4 CI matrix indicating the various interactions are given in Scheme S4 for localized MOs and in Scheme S5 for delocalized MOs.



**Scheme S4:** The quantities characterizing the interactions in the  $4 \times 4$  CI model description of two electrons contained in two orthogonal localized orbitals A and B, i.e. their overlap  $S_{AB} = \int A(1)B(1)d\tau_1$  vanishes.

|                       |                              |                       |                  |                |
|-----------------------|------------------------------|-----------------------|------------------|----------------|
|                       | $^1 A^2 + B^2\rangle$        | $^1 A^2 - B^2\rangle$ | $^1 AB\rangle$   | $^3 AB\rangle$ |
| $^1 A^2 + B^2\rangle$ | $E(T) + 2(K'_{AB} + K_{AB})$ | $\delta_{AB}$         | $\gamma_{AB}$    | 0              |
| $^1 A^2 - B^2\rangle$ | $\delta_{AB}$                | $E(T) + 2K'_{AB}$     | $\gamma_{AB}^-$  | 0              |
| $^1 AB\rangle$        | $\gamma_{AB}$                | $\gamma_{AB}^-$       | $E(T) + 2K_{AB}$ | 0              |
| $^3 AB\rangle$        | 0                            | 0                     | 0                | $E(T)$         |

With

$$E(T) = E_0 - (K'_{AB} + K_{AB})$$

$$E_0 = h_{AA} + h_{BB} + (J_{AA} + J_{BB})/4 + J_{AA}/2$$

$$2K'_{AB} = [(J_{AA} + J_{BB})/2 - J_{AB}]/2$$

$$\delta_{AB} = h_{AA} - h_{BB} + (J_{AA} - J_{BB})/2$$

$$\gamma_{AB}^- = (AA|AB) - (BB|BA)$$

$$\gamma_{AB} = 2h_{AB} + (AA|AB) + (BB|BA)$$

$$J_{AB} = \int \int A(1) \cdot A(1) \frac{1}{r_{12}} B(2) \cdot B(2) d\tau_1 d\tau_2$$

$$K_{AB} = \int \int A(1) \cdot B(1) \frac{1}{r_{12}} A(2) \cdot B(2) d\tau_1 d\tau_2$$

$$(AA|AB) = \int \int A(1) \cdot A(1) \frac{1}{r_{12}} A(2) \cdot B(2) d\tau_1 d\tau_2$$

$$h_{AB} = \int A(1) h(1) B(1) d\tau_1$$

**Scheme S5:** The quantities characterizing the interactions in the  $4 \times 4$  CI model description of two electrons contained in two orthogonal delocalized orbitals a and b, i.e. their overlap  $S_{ab} = \int a(1)b(1)d\tau_1$  vanishes.

|                       |                              |                  |                       |                |
|-----------------------|------------------------------|------------------|-----------------------|----------------|
|                       | $^1 a^2 + b^2\rangle$        | $^1 ab\rangle$   | $^1 a^2 - b^2\rangle$ | $^3 ab\rangle$ |
| $^1 a^2 + b^2\rangle$ | $E(T) + 2(K_{ab} + K'_{ab})$ | $\gamma_{ab}$    | $\delta_{ab}$         | 0              |
| $^1 ab\rangle$        | $\gamma_{ab}$                | $E(T) + 2K_{ab}$ | $\gamma_{ab}^-$       | 0              |
| $^1 a^2 - b^2\rangle$ | $\delta_{ab}$                | $\gamma_{ab}^-$  | $E(T) + 2K'_{ab}$     | 0              |
| $^3 ab\rangle$        | 0                            | 0                | 0                     | $E(T)$         |

The expressions for the matrix elements can be taken from Scheme S4 by changing A, B by a, b. However, while the expressions remain, the actual number changes (see text).

As depicted in Scheme S3 delocalized and localized MOs can be transformed into each other. As nicely explained in the aforementioned reviews,<sup>[2]</sup> some expressions in Scheme S4 and S5 remain invariant while others interchange. Going from the localized to the delocalized orbitals,

$E_0$ ,  $E(T)$ ,  $K'_{xy} \pm K_{xy}$ ,  $(K'_{xy} - K_{xy})^2 - \gamma_{xy}^-$ , and  $\delta_{xy}^2 + \gamma_{xy}^2$  ( $xy \equiv A, B$  or  $a, b$ ) stay invariant. The same holds for  $^1|A^2 + B^2\rangle$ , which transform into  $^1|a^2 + b^2\rangle$ . In contrast,  $^1|A^2 - B^2\rangle$  transforms into  $^1|ab\rangle$  and  $^1|AB\rangle$  into  $^1|a^2 - b^2\rangle$ . Finally,  $K'_{AB}$  and  $K_{ab}$  are connected through  $K'_{AB} = K_{ab}$  and  $K'_{ab} = K_{AB}$ . Similarly,  $\delta_{AB} = \gamma_{ab}$  and  $\delta_{ab} = \gamma_{AB}$  holds. Using these relationships, the matrix describing the interactions between the states in the localized basis (Scheme S4) transforms into the matrix describing the interactions between the states in delocalized basis (Scheme S5).

The question arises when we expect a triplet ground state and what is the energy sequence of the singlet states. If the interactions between the singlet states are zero or neglected, the triplet state is the lowest state because all quantities are positive. For both types of orbitals,  $^1|\phi_1^2 + \phi_2^2\rangle$  represents the highest lying state but the states  $^1|\phi_1\phi_2\rangle$  and  $^1|\phi_1^2 - \phi_2^2\rangle$  change their energy position. For localized orbitals,  $^1|AB\rangle$  is lower in energy than  $^1|A^2 - B^2\rangle$ . This order comes about because  $K_{AB}$  is smaller than  $K'_{AB}$ . The exchange integral  $K_{AB}$  depend on the so-called differential overlap  $A(1) \cdot B(1) d\tau$ . However, this product is always small because the localized orbitals are far apart, so  $K_{AB}$  is also quite small. On the other hand,  $K'_{AB}$  is large.  $J_{AA}$  ( $J_{BB}$ ) represents the coulomb repulsion between two electrons occupying the localized orbital

A (B). Because the orbitals are localized this interaction will be quite large.  $J_{AB}$  on the other side represents the coulomb repulsion between two electrons whereby one occupies A but the other B. Since A and B are far apart,  $J_{AB}$  will be much smaller than  $J_{AA}$  or  $J_{BB}$ . Going from localized to delocalized orbitals (Scheme S3) both states interchange their form and their energy position. Now,  ${}^1|ab\rangle$  lies above  ${}^1|a^2 - b^2\rangle$ . This results, because  $K_{ab}$  and  $K'_{ab}$  interchange. For delocalized orbitals  $K_{ab}$  is large because the delocalized orbitals cover the whole space so that their differential overlap  $a(1) \cdot b(1) d\tau$  becomes large. On the other hand,  $K'_{ab}$  is small because  $J_{aa}$ ,  $J_{bb}$  and  $J_{ab}$  are similar in size. The latter also arise from the delocalized forms of a and b.  $J_{aa}$  ( $J_{bb}$ ) are smaller than  $J_{AA}$  ( $J_{BB}$ ) because the electrons can avoid each other in the delocalized orbitals.  $J_{ab}$  on the other hand is larger than  $J_{AB}$  because the both orbitals spread in the same space. The switching of the states as a function of the shape of the orbitals explains the qualitative behavior for the lowest-lying singlet states of the saturated hydrocarbon-bridged compounds.

Whether the saturated hydrocarbon- or  $C_2R_2$ -bridged compounds possess a singlet or triplet ground state can be explained on the basis of possible interactions between the spin centers. Due to the interaction the degeneracy of the orbitals is lifted and the singlet state in which the lower lying orbital is doubly occupied becomes lower in energy than the triplet state in which both orbitals are occupied. This picture can be transferred into the picture of the interacting states discussed above. If the orbital  $\phi_1$  becomes considerably more stable than orbital  $\phi_2$ , the states  ${}^1|\phi_1^2 - \phi_2^2\rangle$  and  ${}^1|\phi_1^2 + \phi_2^2\rangle$  start to mix, leading to the lower lying state  ${}^1|\phi_1^2\rangle$  and the higher lying  ${}^1|\phi_2^2\rangle$ . This mixing is introduced either by the explicit expressions for the diagonal elements of the matrices or by an increase of the outer-diagonal matrix element  $\delta_{ab}$ , which is a measure of the energy difference of both orbitals. For more information, refer to the original articles.<sup>2</sup>

We explain above that the interaction between the spin centers is responsible for the twisted structures of the saturated hydrocarbon-bridged systems possessing triplet ground states while singlet ground states are found for the planar conformers. Additionally, Figure S5 shows that the size of the S-T gap nicely correlates with the distance of the spin centers. For the parallel orientation, the S-T gap computed with NEVPT2 becomes increasingly positive with decreasing bridge size, i.e. as expected, the interaction between the spin centers increases with decreasing distance. For the twisted conformer we always find a triplet ground state, but the S-T gap decreases with increasing size of the bridge. This can easily be explained by the decreasing size of the exchange integral  $K_{AB}$  as a function of the distance between the localized orbitals A and B. Besides NEVPT2 results, Figure S5 also gives the CASCI(2,2) energies. This less sophisticated level of theory always predicts a triplet ground state. This indicates that dynamic correlation effects are essential for an accurate description of the S-T gap.

#### IV. Further information on the NHC-stabilized systems

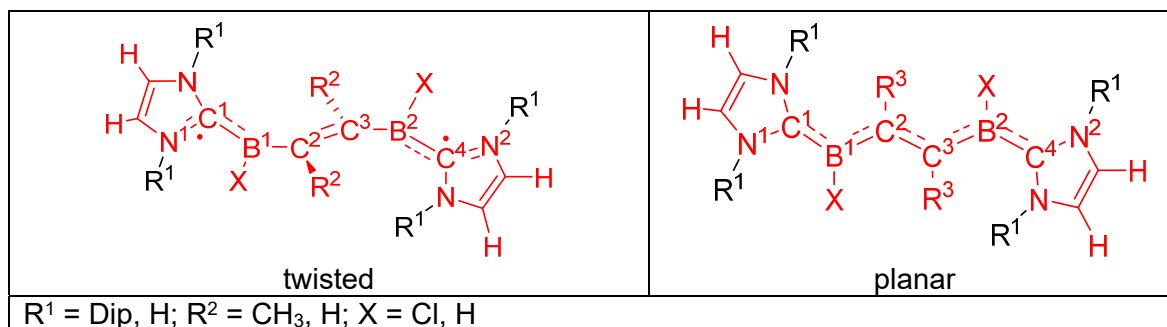

**Scheme S6:** Sketch of the characterized NHC compounds. In the naming of the compounds  $R^1 = \text{Dip}$  are denoted *Full* while  $R^1 = \text{H}$  is denoted *Mod*. The substituents  $R^2$  and  $X$  are explicitly given. For examples the compound with  $R^1 = \text{Dip}$ ,  $R^2 = \text{CH}_3$  and  $X = \text{Cl}$  is abbreviated as **NHC\_Full\_CH<sub>3</sub>\_Cl** while the one with  $R^1 = \text{H}$ ,  $R^2 = \text{H}$  and  $X = \text{H}$  is called **NHC\_Mod\_H\_H**. In the planar geometry the dihedral angles  $\angle N^1C^1B^1C^2$ ,  $\angle C^1B^1C^2C^3$ ,  $\angle B^1C^2C^3B^2$ ,  $\angle C^2C^3B^2C^4$ , and  $\angle C^3B^2C^4N^2$  are equal to  $180^\circ$ . For the twisted geometry, the dihedral angles  $\angle N^1C^1B^1C^2$ ,  $\angle B^1C^2C^3B^2$ , and  $\angle C^3B^2C^4N^2$  are equal to  $180^\circ$  while  $\angle C^1B^1C^2C^3 = -90^\circ$  and  $\angle C^2C^3B^2C^4 = 90^\circ$ . Geometries obtained by optimization without constraints are denoted “full opt.”. The corresponding dihedral angles for the fully optimized structures are given in Table S9. For more information see main text and below.

**Table S7:** Selected bond distances within the characterized NHC stabilized compounds ( $S_0$ ). Distances are given in Å. The enumeration of the centers is given in Scheme S6.

| Comp.                                                     | $R_{N^1C^1}$ | $R_{C^1B^1}$ | $R_{B^1C^2}$ | $R_{C^2C^3}$ | $R_{C^3B^2}$ | $R_{B^2C^4}$ | $R_{C^4N^2}$ |
|-----------------------------------------------------------|--------------|--------------|--------------|--------------|--------------|--------------|--------------|
| Full system with bulky substituents                       |              |              |              |              |              |              |              |
| <b>NHC_Full_C<sub>2</sub>H<sub>5</sub>_Cl</b> (full opt.) | 1.36         | 1.56         | 1.46         | 1.45         | 1.47         | 1.55         | 1.36         |
| <b>NHC_Full_C<sub>2</sub>H<sub>5</sub>_Cl</b> (twisted)   | 1.39         | 1.51         | 1.56         | 1.36         | 1.57         | 1.51         | 1.39         |
| <b>NHC_Full_C<sub>2</sub>H<sub>5</sub>_Cl</b> (planar)    | 1.39         | 1.55         | 1.50         | 1.44         | 1.50         | 1.58         | 1.38         |
| <b>NHC_Full_CH<sub>3</sub>_Cl</b> (full opt.)             | 1.37         | 1.55         | 1.48         | 1.44         | 1.47         | 1.57         | 1.36         |
| <b>NHC_Full_CH<sub>3</sub>_Cl</b> (twisted)               | 1.39         | 1.52         | 1.58         | 1.36         | 1.58         | 1.52         | 1.39         |
| <b>NHC_Full_CH<sub>3</sub>_Cl</b> (planar)                | 1.39         | 1.55         | 1.51         | 1.43         | 1.51         | 1.55         | 1.39         |
| <b>NHC_Full_H_Cl</b> (full opt.)                          | 1.37         | 1.55         | 1.48         | 1.41         | 1.48         | 1.55         | 1.38         |
| <b>NHC_Full_H_Cl</b> (twisted)                            | 1.39         | 1.51         | 1.56         | 1.35         | 1.55         | 1.51         | 1.39         |
| <b>NHC_Full_H_Cl</b> (planar)                             | 1.37         | 1.55         | 1.48         | 1.41         | 1.48         | 1.54         | 1.38         |
| <b>NHC_Full_C<sub>2</sub>H<sub>5</sub>_H</b> (full opt.)  | 1.38         | 1.54         | 1.50         | 1.44         | 1.49         | 1.54         | 1.38         |
| <b>NHC_Full_C<sub>2</sub>H<sub>5</sub>_H</b> (twisted)    | 1.39         | 1.51         | 1.57         | 1.36         | 1.58         | 1.51         | 1.38         |
| <b>NHC_Full_C<sub>2</sub>H<sub>5</sub>_H</b> (planar)     | 1.39         | 1.55         | 1.50         | 1.44         | 1.50         | 1.55         | 1.39         |
| <b>NHC_Full_CH<sub>3</sub>_H</b> (full opt.)              | 1.38         | 1.54         | 1.49         | 1.43         | 1.49         | 1.54         | 1.38         |
| <b>NHC_Full_CH<sub>3</sub>_H</b> (twisted)                | 1.39         | 1.52         | 1.57         | 1.36         | 1.57         | 1.52         | 1.39         |
| <b>NHC_Full_CH<sub>3</sub>_H</b> (planar)                 | 1.38         | 1.54         | 1.49         | 1.44         | 1.49         | 1.54         | 1.38         |
| <b>NHC_Full_H_H</b> (full opt.)                           | 1.38         | 1.54         | 1.48         | 1.41         | 1.48         | 1.53         | 1.38         |
| <b>NHC_Full_H_H</b> (twisted)                             | 1.37         | 1.52         | 1.56         | 1.34         | 1.56         | 1.52         | 1.38         |
| <b>NHC_Full_H_H</b> (planar)                              | 1.37         | 1.54         | 1.48         | 1.41         | 1.48         | 1.54         | 1.38         |
| Model compound without bulky substituents                 |              |              |              |              |              |              |              |
| <b>NHC_Mod_C<sub>2</sub>H<sub>5</sub>_Cl</b> (twisted)    | 1.37         | 1.50         | 1.56         | 1.36         | 1.56         | 1.50         | 1.37         |
| <b>NHC_Mod_C<sub>2</sub>H<sub>5</sub>_Cl</b> (planar)     | 1.36         | 1.56         | 1.49         | 1.44         | 1.49         | 1.56         | 1.36         |
| <b>NHC_Mod_CH<sub>3</sub>_Cl</b> (twisted)                | 1.37         | 1.50         | 1.56         | 1.36         | 1.56         | 1.50         | 1.37         |
| <b>NHC_Mod_CH<sub>3</sub>_Cl</b> (planar)                 | 1.36         | 1.55         | 1.49         | 1.44         | 1.49         | 1.55         | 1.36         |
| <b>NHC_Mod_H_Cl</b> (twisted)                             | 1.37         | 1.50         | 1.56         | 1.35         | 1.56         | 1.50         | 1.37         |
| <b>NHC_Mod_H_Cl</b> (planar)                              | 1.36         | 1.53         | 1.46         | 1.41         | 1.46         | 1.53         | 1.36         |
| <b>NHC_Mod_C<sub>2</sub>H<sub>5</sub>_H</b> (twisted)     | 1.37         | 1.51         | 1.58         | 1.36         | 1.58         | 1.51         | 1.37         |
| <b>NHC_Mod_C<sub>2</sub>H<sub>5</sub>_H</b> (planar)      | 1.37         | 1.54         | 1.49         | 1.44         | 1.49         | 1.54         | 1.37         |
| <b>NHC_Mod_CH<sub>3</sub>_H</b> (twisted)                 | 1.37         | 1.51         | 1.58         | 1.36         | 1.58         | 1.51         | 1.37         |
| <b>NHC_Mod_CH<sub>3</sub>_H</b> (planar)                  | 1.37         | 1.53         | 1.49         | 1.43         | 1.49         | 1.53         | 1.37         |
| <b>NHC_Mod_H_H</b> (twisted)                              | 1.37         | 1.51         | 1.57         | 1.35         | 1.57         | 1.51         | 1.37         |
| <b>NHC_Mod_H_H</b> (planar)                               | 1.36         | 1.53         | 1.48         | 1.41         | 1.48         | 1.53         | 1.36         |

**Table S8:** Selected bond angles of the characterized NHC-stabilized compounds ( $S_0$ ). The enumeration of the centers is given in Scheme S6.

| Comp.                                                     | $\angle N^1 C^1 B^1$ | $\angle C^1 B^1 C^2$ | $\angle B^1 C^2 C^3$ | $\angle C^2 C^3 B^2$ | $\angle C^3 B^2 C^4$ | $\angle B^2 C^4 N^2$ |
|-----------------------------------------------------------|----------------------|----------------------|----------------------|----------------------|----------------------|----------------------|
| Full system with bulky substituents                       |                      |                      |                      |                      |                      |                      |
| <b>NHC_Full_C<sub>2</sub>H<sub>5</sub>_Cl</b> (full opt.) | 126.2                | 126.0                | 124.3                | 124.8                | 123.3                | 128.1                |
| <b>NHC_Full_C<sub>2</sub>H<sub>5</sub>_Cl</b> (twisted)   | 128.2                | 131.9                | 122.6                | 118.1                | 126.7                | 129.3                |
| <b>NHC_Full_C<sub>2</sub>H<sub>5</sub>_Cl</b> (planar)    | 128.5                | 125.5                | 125.7                | 128.7                | 124.2                | 125.4                |
| <b>NHC_Full_CH<sub>3</sub>_Cl</b> (full opt.)             | 127.4                | 123.2                | 126.8                | 128.2                | 122.9                | 124.7                |
| <b>NHC_Full_CH<sub>3</sub>_Cl</b> (twisted)               | 129.1                | 132.3                | 122.1                | 121.7                | 130.8                | 128.3                |
| <b>NHC_Full_CH<sub>3</sub>_Cl</b> (planar)                | 128.0                | 124.9                | 124.5                | 124.5                | 124.9                | 128.1                |
| <b>NHC_Full_H_Cl</b> (full opt.)                          | 128.8                | 125.0                | 124.3                | 126.7                | 122.9                | 129.1                |
| <b>NHC_Full_H_Cl</b> (twisted)                            | 129.3                | 123.6                | 125.2                | 126.7                | 126.8                | 129.1                |
| <b>NHC_Full_H_Cl</b> (planar)                             | 128.8                | 123.4                | 125.6                | 125.9                | 123.1                | 129.0                |
| <b>NHC_Full_C<sub>2</sub>H<sub>5</sub>_H</b> (full opt.)  | 124.9                | 131.5                | 116.8                | 122.7                | 127.6                | 123.7                |
| <b>NHC_Full_C<sub>2</sub>H<sub>5</sub>_H</b> (twisted)    | 123.7                | 130.5                | 125.3                | 119.4                | 123.9                | 126.5                |
| <b>NHC_Full_C<sub>2</sub>H<sub>5</sub>_H</b> (planar)     | 120.3                | 133.7                | 122.1                | 122.1                | 133.7                | 120.3                |
| <b>NHC_Full_CH<sub>3</sub>_H</b> (full opt.)              | 124.9                | 124.5                | 122.5                | 122.6                | 124.4                | 125.0                |
| <b>NHC_Full_CH<sub>3</sub>_H</b> (twisted)                | 125.6                | 127.1                | 123.2                | 123.2                | 127.1                | 125.6                |
| <b>NHC_Full_CH<sub>3</sub>_H</b> (planar)                 | 122.6                | 127.0                | 122.0                | 122.0                | 127.0                | 122.6                |
| <b>NHC_Full_H_H</b> (full opt.)                           | 125.8                | 121.7                | 128.2                | 119.3                | 127.3                | 123.1                |
| <b>NHC_Full_H_H</b> (twisted)                             | 126.0                | 122.8                | 126.9                | 125.4                | 120.5                | 126.6                |
| <b>NHC_Full_H_H</b> (planar)                              | 125.4                | 124.1                | 125.4                | 122.5                | 124.8                | 125.0                |
| Model compound without bulky substituents                 |                      |                      |                      |                      |                      |                      |
| <b>NHC_Mod_C<sub>2</sub>H<sub>5</sub>_Cl</b> (twisted)    | 130.1                | 122.6                | 123.2                | 123.2                | 122.6                | 130.1                |
| <b>NHC_Mod_C<sub>2</sub>H<sub>5</sub>_Cl</b> (planar)     | 123.6                | 125.4                | 130.4                | 130.4                | 125.4                | 123.6                |
| <b>NHC_Mod_CH<sub>3</sub>_Cl</b> (twisted)                | 130.4                | 121.0                | 123.7                | 123.7                | 121.0                | 130.4                |
| <b>NHC_Mod_CH<sub>3</sub>_Cl</b> (planar)                 | 124.6                | 124.5                | 128.8                | 128.8                | 124.5                | 124.6                |
| <b>NHC_Mod_H_Cl</b> (twisted)                             | 129.6                | 121.6                | 125.4                | 125.4                | 121.6                | 129.6                |
| <b>NHC_Mod_H_Cl</b> (planar)                              | 127.6                | 122.6                | 128.0                | 128.0                | 122.6                | 127.6                |
| <b>NHC_Mod_C<sub>2</sub>H<sub>5</sub>_H</b> (twisted)     | 131.5                | 117.5                | 125.2                | 125.2                | 117.5                | 131.5                |
| <b>NHC_Mod_C<sub>2</sub>H<sub>5</sub>_H</b> (planar)      | 122.6                | 125.0                | 125.0                | 125.0                | 125.0                | 122.6                |
| <b>NHC_Mod_CH<sub>3</sub>_H</b> (twisted)                 | 131.9                | 115.4                | 125.7                | 125.7                | 115.4                | 131.9                |
| <b>NHC_Mod_CH<sub>3</sub>_H</b> (planar)                  | 123.1                | 123.7                | 125.9                | 126.0                | 123.7                | 123.1                |
| <b>NHC_Mod_H_H</b> (twisted)                              | 131.2                | 116.8                | 127.0                | 127.0                | 116.8                | 131.2                |
| <b>NHC_Mod_H_H</b> (planar)                               | 127.9                | 119.3                | 127.7                | 127.7                | 119.3                | 127.9                |

**Table S9:** Selected dihedral angles for the ground state of the fully optimized NHC structures. The enumeration is given in Scheme S6.

| Comp.                                                     | $\angle N^1C^1B^1C^2$ | $\angle C^1B^1C^2C^3$ | $\angle B^1C^2C^3B^2$ | $\angle C^2C^3B^2C^4$ | $\angle C^3B^2C^4N^2$ |
|-----------------------------------------------------------|-----------------------|-----------------------|-----------------------|-----------------------|-----------------------|
| Full systems with bulky substituents                      |                       |                       |                       |                       |                       |
| <b>NHC_Full_C<sub>2</sub>H<sub>5</sub>_Cl</b> (full opt.) | 141.4                 | 162.4                 | 140.2                 | 173.8                 | 125.3                 |
| <b>NHC_Full_CH<sub>3</sub>_Cl</b> (full opt.)             | 156.3                 | 148.7                 | 165.6                 | -177.9                | 119.3                 |
| <b>NHC_Full_H_Cl</b> (full opt.)                          | 174.8                 | -166.1                | 163.6                 | -170.3                | 178.6                 |
| <b>NHC_Full_C<sub>2</sub>H<sub>5</sub>_H</b> (full opt.)  | -160.9                | -167.0                | -144.7                | 144.9                 | 172.6                 |
| <b>NHC_Full_CH<sub>3</sub>_H</b> (full opt.)              | 167.3                 | 157.0                 | 179.8                 | -156.3                | -167.4                |
| <b>NHC_Full_H_H</b> (full opt.)                           | 171.1                 | -166.5                | 163.4                 | -165.9                | 157.4                 |

**Table S10:** Computed NHC-stabilized compounds. Relative energies [kcal/mol] with respect to the S<sub>0</sub> state of the planar structure of the characterized compounds ( $\Delta E_{p \rightarrow t}$ ).  $\Delta E_{p \rightarrow t}$  is positive if the planar structure is more stable.

| Comp.                                                     | NEVPT2(4,6)/cc-pVDZ |                |         |                     | UMN12L/6-311G(d,p) |                |         |                                  |
|-----------------------------------------------------------|---------------------|----------------|---------|---------------------|--------------------|----------------|---------|----------------------------------|
|                                                           | S <sub>0</sub>      | T <sub>0</sub> | S-T gap | Y (S <sub>0</sub> ) | S <sub>0</sub>     | T <sub>0</sub> | S-T gap | S <sup>2</sup> (S <sub>0</sub> ) |
| Full systems with bulky substituents                      |                     |                |         |                     |                    |                |         |                                  |
| <b>NHC_Full_C<sub>2</sub>H<sub>5</sub>_Cl</b> (full opt.) | -                   | -              | -       | -                   | -28.8              | -22.2          | 6.6     | 0.00                             |
| <b>NHC_Full_C<sub>2</sub>H<sub>5</sub>_Cl</b> (twisted)   | -                   | -              | -       | -                   | -18.6              | -18.4          | 0.2     | 1.00                             |
| <b>NHC_Full_C<sub>2</sub>H<sub>5</sub>_Cl</b> (planar)    | -                   | -              | -       | -                   | 0.0                | 10.7           | 10.7    | 0.00                             |
| <b>NHC_Full_CH<sub>3</sub>_Cl</b> (full opt.)             | -                   | -              | -       | -                   | -27.3              | -19.0          | 8.3     | 0.00                             |
| <b>NHC_Full_CH<sub>3</sub>_Cl</b> (twisted)               | -                   | -              | -       | -                   | -9.8               | -10.6          | -0.8    | 0.95                             |
| <b>NHC_Full_CH<sub>3</sub>_Cl</b> (planar)                | -                   | -              | -       | -                   | 0.0                | 5.5            | 5.5     | 0.00                             |
| <b>NHC_Full_H_Cl</b> (full opt.)                          | -                   | -              | -       | -                   | -2.0               | 12.6           | 14.6    | 0.00                             |
| <b>NHC_Full_H_Cl</b> (twisted)                            | -                   | -              | -       | -                   | 28.0               | 28.0           | 0.0     | 1.01                             |
| <b>NHC_Full_H_Cl</b> (planar)                             | -                   | -              | -       | -                   | 0.0                | 16.3           | 16.3    | 0.00                             |
| <b>NHC_Full_C<sub>2</sub>H<sub>5</sub>_H</b> (full opt.)  | -                   | -              | -       | -                   | -13.4              | -7.7           | 5.7     | 0.00                             |
| <b>NHC_Full_C<sub>2</sub>H<sub>5</sub>_H</b> (twisted)    | -                   | -              | -       | -                   | -1.1               | -0.9           | 0.2     | 1.01                             |
| <b>NHC_Full_C<sub>2</sub>H<sub>5</sub>_H</b> (planar)     | -                   | -              | -       | -                   | 0.0                | 12.1           | 12.1    | 0.00                             |
| <b>NHC_Full_CH<sub>3</sub>_H</b> (full opt.)              | -                   | -              | -       | -                   | -10.4              | -4.5           | 5.9     | 0.00                             |
| <b>NHC_Full_CH<sub>3</sub>_H</b> (twisted)                | -                   | -              | -       | -                   | -2.7               | -0.1           | 2.6     | 0.94                             |
| <b>NHC_Full_CH<sub>3</sub>_H</b> (planar)                 | -                   | -              | -       | -                   | 0.0                | 14.9           | 14.9    | 0.00                             |
| <b>NHC_Full_H_H</b> (full opt.)                           | -                   | -              | -       | -                   | -0.7               | 11.6           | 12.3    | 0.00                             |
| <b>NHC_Full_H_H</b> (twisted)                             | -                   | -              | -       | -                   | 20.5               | 20.5           | 0.0     | 1.01                             |
| <b>NHC_Full_H_H</b> (planar)                              | -                   | -              | -       | -                   | 0.0                | 14.0           | 14.0    | 0.00                             |
| Model system without the bulky substituents               |                     |                |         |                     |                    |                |         |                                  |
| <b>NHC_Mod_C<sub>2</sub>H<sub>5</sub>_Cl</b> (twisted)    | 15.9                | 16.4           | 0.5     | 0.77                | 14.5               | 15.2           | 0.7     | 0.96                             |
| <b>NHC_Mod_C<sub>2</sub>H<sub>5</sub>_Cl</b> (planar)     | 0.0                 | 27.2           | 27.2    | 0.01                | 0.0                | 20.5           | 20.5    | 0.00                             |
| <b>NHC_Mod_CH<sub>3</sub>_Cl</b> (twisted)                | 11.3                | 11.8           | 0.5     | 0.77                | 14.4               | 15.2           | 0.8     | 0.95                             |
| <b>NHC_Mod_CH<sub>3</sub>_Cl</b> (planar)                 | 0.0                 | 21.7           | 21.7    | 0.01                | 0.0                | 19.1           | 19.1    | 0.00                             |
| <b>NHC_Mod_H_Cl</b> (twisted)                             | 33.8                | 33.5           | -0.3    | 0.91                | 35.4               | 35.5           | 0.1     | 1.01                             |
| <b>NHC_Mod_H_Cl</b> (planar)                              | 0.0                 | 25.7           | 25.7    | 0.01                | 0.0                | 21.5           | 21.5    | 0.00                             |
| <b>NHC_Mod_C<sub>2</sub>H<sub>5</sub>_H</b> (twisted)     | 24.8                | 25.5           | 0.7     | 0.76                | 22.0               | 22.8           | 0.8     | 0.96                             |
| <b>NHC_Mod_C<sub>2</sub>H<sub>5</sub>_H</b> (planar)      | 0.0                 | 26.4           | 26.4    | 0.01                | 0.0                | 19.6           | 19.6    | 0.00                             |
| <b>NHC_Mod_CH<sub>3</sub>_H</b> (twisted)                 | 24.5                | 25.2           | 0.7     | 0.73                | 22.4               | 23.4           | 1.0     | 0.95                             |
| <b>NHC_Mod_CH<sub>3</sub>_H</b> (planar)                  | 0.0                 | 25.3           | 25.3    | 0.02                | 0.0                | 19.1           | 19.1    | 0.00                             |

|                              |      |      |      |      |      |      |      |      |
|------------------------------|------|------|------|------|------|------|------|------|
| <b>NHC_Mod_H_H (twisted)</b> | 31.9 | 31.6 | -0.3 | 0.91 | 30.5 | 30.6 | 0.1  | 1.01 |
| <b>NHC_Mod_H_H (planar)</b>  | 0.0  | 25.7 | 25.7 | 0.01 | 0.0  | 20.7 | 20.7 | 0.00 |



## V. Comparison of planar structures of CAAC- and NHC-stabilized compounds

**Table S11:** Influence of cyclic carbenes CAAC and NHC, respectively, for selected model systems of  $C_2R_2$ -bridged and non-bridged diborenes.  $\Delta E_{p \rightarrow t}$  gives the relative energy between the planar and the twisted structure. A negative sign would indicate a twisted structure as a ground state. In the twisted structure of the  $C_2R_2$ -bridged diborenes, the  $C_2R_2$ -bridge is rotated by  $90^\circ$  with respect to the boron / cyclic carbene planes. For the twisted diborenes both boron / carbene moieties are rotated by  $90^\circ$  with respect to each other.  $\Delta E_{ST}$  gives the S-T gap for the planar structure. A positive sign indicates a singlet ground state. For the bridged systems we employed NEVPT2(4,6)/cc-pVDZ while NEVPT2(2,4)/cc-pVDZ were used for the diborenes. The singlet orbital energies are taken from UMN12L computations, which show nearly identical trends and orbitals.

| Comp.                                                                               | $\Delta E_{p \rightarrow t}$ | S-T gap | HOMO-1                                                                               | HOMO                                                                                  | LUMO                                                                                  |
|-------------------------------------------------------------------------------------|------------------------------|---------|--------------------------------------------------------------------------------------|---------------------------------------------------------------------------------------|---------------------------------------------------------------------------------------|
| 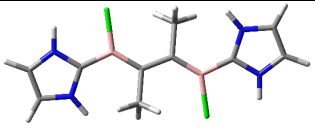   | 11.3                         | 21.7    |    |    |    |
| <b>NHC Mod CH<sub>3</sub> Cl</b>                                                    |                              |         | -121.6                                                                               | -69.7                                                                                 | -37.1                                                                                 |
|    | 3.5                          | 10.6    |    |    |    |
| <b>CAAC Mod CH<sub>3</sub> Cl</b>                                                   |                              |         | -128.9                                                                               | -84.5                                                                                 | -59.7                                                                                 |
|   | 24.5                         | 25.3    |   |   |   |
| <b>NHC Mod CH<sub>3</sub> H</b>                                                     |                              |         | -114.0                                                                               | -60.3                                                                                 | -27.3                                                                                 |
|  | 13.1                         | 14.7    |  |  |  |
| <b>CAAC Mod CH<sub>3</sub> H</b>                                                    |                              |         | -117.0                                                                               | -77.5                                                                                 | -49.1                                                                                 |

| Comp.                                                                             | $\Delta E_{p \rightarrow t}$ | $\Delta E_{ST}$ | HOMO                                                                               | LUMO                                                                                |
|-----------------------------------------------------------------------------------|------------------------------|-----------------|------------------------------------------------------------------------------------|-------------------------------------------------------------------------------------|
| 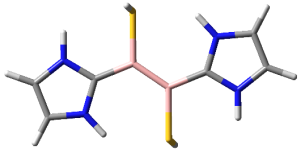 | 26.1                         | 25.1            |  |  |
| <b>NHC-Diborene</b>                                                               |                              |                 | -73.3                                                                              | -28.7                                                                               |
|  | 5.2                          | 9.6             |  |  |
| <b>CAAC-Diborene</b>                                                              |                              |                 | -83.1                                                                              | -53.3                                                                               |

**Table S12:** Reaction energies  $\Delta E_{\text{Reac.}}$  of the exchange reaction replacing CAAC ligands by NHC ligands. (see Scheme 2 of main text)

| Substituents                                 | $\Delta E_{\text{Reac.}}$ [kcal/mol] |
|----------------------------------------------|--------------------------------------|
|                                              | UMN12L/6-311G(d,p)                   |
| <b>XX Full C<sub>2</sub>H<sub>5</sub> Cl</b> | 10.1                                 |
| <b>XX Full CH<sub>3</sub> Cl</b>             | 4.3                                  |
| <b>XX Full H Cl</b>                          | 2.6                                  |
| <b>XX Full C<sub>2</sub>H<sub>5</sub> H</b>  | 8.1                                  |
| <b>XX Full CH<sub>3</sub> H</b>              | 4.4                                  |
| <b>XX Full H H</b>                           | 11.2                                 |

## VI. References

- [S1] a) K. Yamaguchi, *Chem. Phys. Lett.* **1975**, *33*, 330–335; b) S. Yamanaka, M. Okumura, M. Nakano, K. Yamaguchi, *J. Mol. Struct.* **1994**, *310*, 205–218; c) M. Nakano, *Top. Curr. Chem.* **2017**, *375*, 47.
- [S2] a) V. Bonačić-Koutecký, J. Koutecký, J. Michl, *Angew. Chem. Int. Ed.* **1987**, *26*, 170–189; b) J. Michl, V. Bonačić-Koutecký, *Tetrahedron* **1988**, *44*, 7559–7585.
- [S3] Szabo, A.; Ostlund, N. S. *Modern Quantum Chemistry: Introduction to Advanced Electronic Structure Theory*; Dover Publications: New York, 1996.

VII. XYZ-coordinates of all *full* systems optimized with UMN12L/6-311G(d,p)

1. CAAC\_Full\_C<sub>2</sub>H<sub>5</sub>\_Cl (fully optimized)-singlet:

|   |             |             |             |
|---|-------------|-------------|-------------|
| C | -6.03386000 | 3.92112300  | -2.00974700 |
| N | -7.79107100 | 3.88786600  | -0.47364600 |
| C | -5.87620500 | 2.70970900  | -1.07590400 |
| C | -7.20725100 | 2.52248100  | -0.34951500 |
| H | -5.09546000 | 2.93666000  | -0.33600600 |
| H | -5.56783400 | 1.80730700  | -1.61708100 |
| C | -7.14401900 | 4.72105700  | -1.32741400 |
| C | -6.54464000 | 7.08866700  | -2.56246700 |
| C | -5.62990400 | 7.91550800  | -2.00900000 |
| C | -6.79548100 | 7.11180300  | -4.05976900 |
| H | -6.52745600 | 8.10117500  | -4.47144400 |
| H | -6.10195900 | 6.40940200  | -4.56059300 |
| C | -5.37905200 | 7.89237200  | -0.51170200 |
| H | -5.64714100 | 6.90302300  | -0.10001600 |
| H | -6.07251400 | 8.59483000  | -0.01087400 |
| C | -6.50975000 | 3.49485800  | -3.40730100 |
| H | -6.62369700 | 4.37002600  | -4.05392300 |
| H | -7.47311000 | 2.97539900  | -3.38049200 |
| H | -5.77185700 | 2.82601100  | -3.87012300 |
| C | -4.68869800 | 4.63732600  | -2.15158700 |
| H | -3.90989000 | 3.89138600  | -2.35762000 |
| H | -4.41590800 | 5.16746900  | -1.22965800 |
| H | -4.67846000 | 5.36215900  | -2.96916500 |
| C | -7.00077600 | 2.12454300  | 1.10853900  |
| H | -6.29346400 | 2.78469100  | 1.61575400  |
| H | -6.59448600 | 1.10814700  | 1.14137200  |
| H | -7.94945200 | 2.12272400  | 1.65779400  |
| C | -8.12008100 | 1.46563300  | -0.97338400 |
| H | -8.31781300 | 1.62970300  | -2.03448000 |
| H | -9.07580900 | 1.44416000  | -0.43850300 |
| H | -7.65508500 | 0.48033300  | -0.86309800 |
| C | -6.14068400 | 11.08305100 | -2.56163800 |

|    |              |             |             |
|----|--------------|-------------|-------------|
| N  | -4.38361300  | 11.11630300 | -4.09789800 |
| C  | -6.29845900  | 12.29442900 | -3.49550600 |
| C  | -4.96748500  | 12.48166700 | -4.22202700 |
| H  | -6.60680000  | 13.19684200 | -2.95432900 |
| H  | -7.07926800  | 12.06743400 | -4.23532100 |
| C  | -5.66466100  | 11.50937500 | -1.16414700 |
| H  | -4.70134200  | 12.02890300 | -1.19107700 |
| H  | -5.55057600  | 10.63422600 | -0.51752300 |
| H  | -6.40254800  | 12.17817800 | -0.70125300 |
| C  | -7.48581500  | 10.36682200 | -2.41962900 |
| H  | -7.49596400  | 9.64206400  | -1.60198300 |
| H  | -7.75866700  | 9.83657900  | -3.34148200 |
| H  | -8.26462700  | 11.11275700 | -2.21359800 |
| C  | -4.05462900  | 13.53857200 | -3.59829300 |
| H  | -3.85680600  | 13.37457200 | -2.53720300 |
| H  | -4.51965900  | 14.52385400 | -3.70859800 |
| H  | -3.09894400  | 13.56003800 | -4.13325200 |
| C  | -5.17411200  | 12.87953100 | -5.68007800 |
| H  | -5.88143400  | 12.21931900 | -6.18719700 |
| H  | -4.22548600  | 12.88137700 | -6.22941900 |
| H  | -5.58046200  | 13.89590300 | -5.71292000 |
| B  | -4.74009700  | 8.82735300  | -2.92684000 |
| B  | -7.43446600  | 6.17683000  | -1.64463800 |
| Cl | -8.82445900  | 7.11526800  | -0.91269000 |
| C  | -5.03057500  | 10.28312000 | -3.24405500 |
| Cl | -3.35012000  | 7.88893000  | -3.65883400 |
| C  | -8.98687100  | 4.23977100  | 0.22985200  |
| C  | -10.23125100 | 4.09101400  | -0.40854600 |
| C  | -8.88640200  | 4.78796300  | 1.52126400  |
| C  | -11.37979800 | 4.41795100  | 0.31160100  |
| C  | -10.06588500 | 5.09811100  | 2.19580700  |
| C  | -11.30419400 | 4.90020500  | 1.60739400  |
| H  | -12.35034000 | 4.31167900  | -0.16777600 |
| H  | -12.21168100 | 5.14963000  | 2.14993000  |

|   |              |             |             |
|---|--------------|-------------|-------------|
| H | -10.00581300 | 5.52654400  | 3.19371100  |
| C | -7.56578900  | 5.15963200  | 2.17752600  |
| C | -7.38634100  | 4.47491500  | 3.53650000  |
| H | -7.51796300  | 3.39084600  | 3.49426100  |
| H | -8.11693200  | 4.86604800  | 4.25509200  |
| H | -6.39134100  | 4.68601900  | 3.94424100  |
| C | -7.46760300  | 6.67563700  | 2.38703900  |
| H | -6.74807900  | 4.86760700  | 1.50398500  |
| H | -6.49518000  | 6.93048600  | 2.82482500  |
| H | -8.24262600  | 7.01890800  | 3.08373400  |
| H | -7.58540500  | 7.23061500  | 1.45464900  |
| C | -10.39010300 | 3.70079100  | -1.87023300 |
| C | -11.26590200 | 2.45792400  | -2.05241600 |
| H | -11.31830200 | 2.18120600  | -3.11142600 |
| H | -12.29172000 | 2.66398600  | -1.72325800 |
| H | -10.90953100 | 1.59087600  | -1.49109500 |
| C | -11.01291900 | 4.85040800  | -2.67215700 |
| H | -9.39434500  | 3.50968800  | -2.28953100 |
| H | -11.07051500 | 4.57985500  | -3.73309600 |
| H | -10.44152000 | 5.77623500  | -2.57980800 |
| H | -12.03527600 | 5.05059400  | -2.32783200 |
| C | -3.18785100  | 10.76441500 | -4.80147000 |
| C | -1.94343600  | 10.91323200 | -4.16315500 |
| C | -2.10892900  | 9.90606400  | -6.76747000 |
| C | -0.87059000  | 10.10402900 | -6.17914100 |
| C | -0.79492100  | 10.58631600 | -4.88336300 |
| H | 0.03687100   | 9.85462300  | -6.72172700 |
| H | 0.17564600   | 10.69263200 | -4.40404900 |
| C | -1.78450900  | 11.30351100 | -2.70149100 |
| C | -1.16164400  | 10.15392900 | -1.89955400 |
| H | -1.73306100  | 9.22810400  | -1.99180900 |
| H | -1.10396300  | 10.42453900 | -0.83863400 |
| H | -0.13931700  | 9.95371200  | -2.24394800 |
| C | -0.90871400  | 12.54639400 | -2.51940400 |

|   |             |             |             |
|---|-------------|-------------|-------------|
| H | -2.78024400 | 11.49462200 | -2.28214800 |
| H | -0.85627400 | 12.82316500 | -1.46041000 |
| H | -1.26512200 | 13.41341100 | -3.08075200 |
| H | 0.11709300  | 12.34033200 | -2.84859500 |
| C | -3.28838200 | 10.21618300 | -6.09286000 |
| C | -4.60902000 | 9.84443000  | -6.74902300 |
| C | -4.70712500 | 8.32841700  | -6.95852000 |
| H | -5.67958700 | 8.07349800  | -7.39618000 |
| H | -4.58916300 | 7.77345000  | -6.02614400 |
| H | -3.93216900 | 7.98520100  | -7.65531500 |
| C | -4.78861300 | 10.52912000 | -8.10799200 |
| H | -5.42669800 | 10.13640900 | -6.07542100 |
| H | -4.65707400 | 11.61319900 | -8.06577900 |
| H | -5.78362300 | 10.31793100 | -8.51566500 |
| H | -4.05803800 | 10.13803400 | -8.82662700 |
| H | -2.16904800 | 9.47760500  | -7.76536000 |
| C | -8.23347900 | 6.77183700  | -4.43548500 |
| H | -8.50564000 | 5.76172600  | -4.09422000 |
| H | -8.93508900 | 7.46654200  | -3.95502000 |
| H | -8.39667800 | 6.81281900  | -5.51690500 |
| C | -3.94102100 | 8.23223600  | -0.13601800 |
| H | -3.23947200 | 7.53748600  | -0.61650700 |
| H | -3.66880000 | 9.24233000  | -0.47728300 |
| H | -3.77779700 | 8.19123600  | 0.94539800  |

**2. CAAC\_Full\_C<sub>2</sub>H<sub>5</sub>\_Cl** (fully optimized)-triplet:

|   |             |            |             |
|---|-------------|------------|-------------|
| C | -6.03329000 | 3.92024300 | -2.00857400 |
| N | -7.79057700 | 3.88746400 | -0.47222300 |
| C | -5.87635500 | 2.70869900 | -1.07472600 |
| C | -7.20772600 | 2.52163200 | -0.34902000 |

|   |             |             |             |
|---|-------------|-------------|-------------|
| H | -5.09602200 | 2.93551100  | -0.33434500 |
| H | -5.56778100 | 1.80628400  | -1.61576000 |
| C | -7.14388100 | 4.72020100  | -1.32693600 |
| C | -6.54389300 | 7.08806500  | -2.56238300 |
| C | -5.63075300 | 7.91613300  | -2.00913200 |
| C | -6.79486700 | 7.10893300  | -4.06008200 |
| H | -6.53144700 | 8.09845600  | -4.47391100 |
| H | -6.09879200 | 6.40868500  | -4.56028700 |
| C | -5.37977000 | 7.89526000  | -0.51143400 |
| H | -5.64318600 | 6.90573400  | -0.09760700 |
| H | -6.07583900 | 8.59550600  | -0.01122100 |
| C | -6.50722300 | 3.49431000  | -3.40684300 |
| H | -6.61839200 | 4.36938600  | -4.05402600 |
| H | -7.47147000 | 2.97638500  | -3.38177700 |
| H | -5.76944900 | 2.82428000  | -3.86813300 |
| C | -4.68798400 | 4.63664100  | -2.14849500 |
| H | -3.90882300 | 3.89096400  | -2.35415000 |
| H | -4.41632600 | 5.16612000  | -1.22583500 |
| H | -4.67689800 | 5.36207800  | -2.96553000 |
| C | -7.00221300 | 2.12176900  | 1.10862700  |
| H | -6.29432200 | 2.78042800  | 1.61696700  |
| H | -6.59715500 | 1.10484700  | 1.14038800  |
| H | -7.95110100 | 2.12036500  | 1.65751500  |
| C | -8.12109300 | 1.46623600  | -0.97457600 |
| H | -8.31871100 | 1.63225200  | -2.03539300 |
| H | -9.07685300 | 1.44450100  | -0.43976200 |
| H | -7.65669900 | 0.48047100  | -0.86589500 |
| C | -6.14137300 | 11.08394300 | -2.56298300 |
| N | -4.38408700 | 11.11671300 | -4.09933500 |
| C | -6.29830500 | 12.29548700 | -3.49683100 |
| C | -4.96694100 | 12.48254200 | -4.22255200 |
| H | -6.60686400 | 13.19790600 | -2.95579400 |
| H | -7.07865000 | 12.06868500 | -4.23720200 |
| C | -5.66744600 | 11.50987600 | -1.16471200 |



|    |              |             |             |
|----|--------------|-------------|-------------|
| H  | -4.70321000  | 12.02782200 | -1.18977900 |
| H  | -5.55625600  | 10.63479500 | -0.51753700 |
| H  | -6.40523300  | 12.17988500 | -0.70341300 |
| C  | -7.48668100  | 10.36754600 | -2.42307400 |
| H  | -7.49777700  | 9.64210800  | -1.60604000 |
| H  | -7.75833100  | 9.83807100  | -3.34573700 |
| H  | -8.26584300  | 11.11322500 | -2.21742500 |
| C  | -4.05357000  | 13.53794700 | -3.59702100 |
| H  | -3.85594700  | 13.37194800 | -2.53620100 |
| H  | -4.51796400  | 14.52371100 | -3.70571600 |
| H  | -3.09781300  | 13.55967400 | -4.13184100 |
| C  | -5.17246900  | 12.88237700 | -5.68020400 |
| H  | -5.88036100  | 12.22370300 | -6.18852400 |
| H  | -4.22358600  | 12.88377600 | -6.22910100 |
| H  | -5.57753500  | 13.89929600 | -5.71198100 |
| B  | -4.74146000  | 8.82780700  | -2.92851100 |
| B  | -7.43318800  | 6.17638500  | -1.64301100 |
| Cl | -8.82095800  | 7.11584200  | -0.90860600 |
| C  | -5.03077800  | 10.28398400 | -3.24461000 |
| Cl | -3.35368400  | 7.88834700  | -3.66290000 |
| C  | -8.98637400  | 4.23952500  | 0.23111100  |
| C  | -10.23070400 | 4.09251700  | -0.40781600 |
| C  | -8.88587700  | 4.78609800  | 1.52321300  |
| C  | -11.37918900 | 4.41941300  | 0.31246700  |
| C  | -10.06528200 | 5.09637100  | 2.19782600  |
| C  | -11.30358200 | 4.90006500  | 1.60885500  |
| H  | -12.34969500 | 4.31437700  | -0.16725700 |
| H  | -12.21103500 | 5.14948300  | 2.15145000  |
| H  | -10.00515600 | 5.52357400  | 3.19625400  |
| C  | -7.56510600  | 5.15578900  | 2.18026700  |
| C  | -7.38694200  | 4.46976600  | 3.53874800  |
| H  | -7.52031200  | 3.38594200  | 3.49563700  |
| H  | -8.11698600  | 4.86152100  | 4.25756000  |
| H  | -6.39165500  | 4.67894000  | 3.94678600  |

|   |              |             |             |
|---|--------------|-------------|-------------|
| C | -7.46521100  | 6.67149200  | 2.39097100  |
| H | -6.74750600  | 4.86330300  | 1.50680800  |
| H | -6.49322400  | 6.92471900  | 2.83065300  |
| H | -8.24099600  | 7.01537800  | 3.08650800  |
| H | -7.58060900  | 7.22726900  | 1.45875400  |
| C | -10.38959600 | 3.70432000  | -1.87006000 |
| C | -11.26542900 | 2.46173600  | -2.05405000 |
| H | -11.31848000 | 2.18706400  | -3.11356200 |
| H | -12.29104100 | 2.66716900  | -1.72385200 |
| H | -10.90871000 | 1.59361500  | -1.49463900 |
| C | -11.01267900 | 4.85508500  | -2.67018000 |
| H | -9.39381600  | 3.51393900  | -2.28975300 |
| H | -11.06906500 | 4.58672100  | -3.73174000 |
| H | -10.44215300 | 5.78119500  | -2.57537800 |
| H | -12.03552800 | 5.05363000  | -2.32637500 |
| C | -3.18829200  | 10.76464600 | -4.80266700 |
| C | -1.94395900  | 10.91167000 | -4.16374900 |
| C | -2.10939000  | 9.90777100  | -6.76937400 |
| C | -0.87108800  | 10.10409600 | -6.18041300 |
| C | -0.79547600  | 10.58476900 | -4.88403300 |
| H | 0.03636300   | 9.85467500  | -6.72301000 |
| H | 0.17503200   | 10.68981700 | -4.40431600 |
| C | -1.78506300  | 11.29988800 | -2.70151100 |
| C | -1.16197000  | 10.14913600 | -1.90137800 |
| H | -1.73249800  | 9.22302500  | -1.99615800 |
| H | -1.10557100  | 10.41751900 | -0.83982300 |
| H | -0.13912600  | 9.95058300  | -2.24519300 |
| C | -0.90923500  | 12.54247800 | -2.51754000 |
| H | -2.78084200  | 11.49026800 | -2.28181600 |
| H | -0.85618200  | 12.81716400 | -1.45803200 |
| H | -1.26595900  | 13.41059000 | -3.07696100 |
| H | 0.11637700   | 12.33704400 | -2.84773800 |
| C | -3.28879300  | 10.21804800 | -6.09475900 |
| C | -4.60956600  | 9.84833000  | -6.75179500 |

|   |             |             |             |
|---|-------------|-------------|-------------|
| C | -4.70943900 | 8.33262300  | -6.96248100 |
| H | -5.68144200 | 8.07937000  | -7.40211100 |
| H | -4.59398300 | 7.77685600  | -6.03026500 |
| H | -3.93368100 | 7.98874800  | -7.65805400 |
| C | -4.78775500 | 10.53433400 | -8.11028300 |
| H | -5.42716300 | 10.14081200 | -6.07832900 |
| H | -4.65441600 | 11.61816200 | -8.06718500 |
| H | -5.78303800 | 10.32512600 | -8.51831400 |
| H | -4.05770300 | 10.14259100 | -8.82909300 |
| H | -2.16951900 | 9.48055000  | -7.76779400 |
| C | -8.23181000 | 6.76243000  | -4.43288400 |
| H | -8.50002400 | 5.75319000  | -4.08542600 |
| H | -8.93524800 | 7.45712400  | -3.95502400 |
| H | -8.39673700 | 6.79700300  | -5.51425500 |
| C | -3.94282300 | 8.24176200  | -0.13864300 |
| H | -3.23938800 | 7.54706800  | -0.61650600 |
| H | -3.67461200 | 9.25100200  | -0.48610500 |
| H | -3.77788900 | 8.20719200  | 0.94272700  |

**3. CAAC\_Full\_C<sub>2</sub>H<sub>5</sub>\_Cl (twisted)-singlet:**

|   |             |            |             |
|---|-------------|------------|-------------|
| C | -5.99986300 | 3.96342800 | -1.95251700 |
| N | -7.79806500 | 3.89490800 | -0.47204000 |
| C | -5.86017800 | 2.73503700 | -1.03960400 |
| C | -7.20705900 | 2.53222200 | -0.34728700 |
| H | -5.09605500 | 2.94875300 | -0.27854700 |
| H | -5.53790500 | 1.84424000 | -1.59176800 |
| C | -7.11270000 | 4.75842900 | -1.26487500 |
| C | -6.57999300 | 7.12029700 | -2.54765400 |

|   |             |             |             |
|---|-------------|-------------|-------------|
| C | -5.59443700 | 7.88390700  | -2.02377700 |
| C | -6.86431900 | 7.15113400  | -4.03913800 |
| H | -6.62345400 | 8.14622300  | -4.45202200 |
| H | -6.16001100 | 6.46789700  | -4.55176700 |
| C | -5.31001800 | 7.85285900  | -0.53232500 |
| H | -5.55124400 | 6.85781400  | -0.11956600 |
| H | -6.01400300 | 8.53632600  | -0.01955400 |
| C | -6.47767300 | 3.56330800  | -3.35767000 |
| H | -6.56334800 | 4.44740400  | -3.99593000 |
| H | -7.45549200 | 3.07139400  | -3.34142400 |
| H | -5.75518900 | 2.87919500  | -3.82273700 |
| C | -4.64611500 | 4.66218100  | -2.08481400 |
| H | -3.88358800 | 3.91052300  | -2.32768200 |
| H | -4.34943900 | 5.15102200  | -1.14837000 |
| H | -4.63518500 | 5.41425400  | -2.87741500 |
| C | -7.03221200 | 2.11355700  | 1.11021800  |
| H | -6.32852100 | 2.75844600  | 1.64115800  |
| H | -6.63570400 | 1.09306300  | 1.13596500  |
| H | -7.99092100 | 2.11235900  | 1.64184500  |
| C | -8.10091500 | 1.47920300  | -1.00400600 |
| H | -8.28718400 | 1.66233800  | -2.06401300 |
| H | -9.06264800 | 1.43912200  | -0.48130000 |
| H | -7.62867000 | 0.49606800  | -0.90634200 |
| C | -6.17467400 | 11.04067000 | -2.61882500 |
| N | -4.37657500 | 11.10935400 | -4.09941100 |
| C | -6.31458200 | 12.26899100 | -3.53178800 |
| C | -4.96775000 | 12.47196700 | -4.22417400 |
| H | -6.63696300 | 13.15976800 | -2.97965300 |
| H | -7.07869700 | 12.05512500 | -4.29281200 |
| C | -5.69672700 | 11.44095500 | -1.21376800 |
| H | -4.71916700 | 11.93336700 | -1.23022300 |
| H | -5.61046100 | 10.55685500 | -0.57557700 |
| H | -6.41944500 | 12.12468700 | -0.74850600 |
| C | -7.52829800 | 10.34172100 | -2.48625200 |

|    |              |             |             |
|----|--------------|-------------|-------------|
| H  | -7.53903400  | 9.58993000  | -1.69338000 |
| H  | -7.82494900  | 9.85246500  | -3.42248800 |
| H  | -8.29094900  | 11.09332000 | -2.24359400 |
| C  | -4.07395000  | 13.52511000 | -3.56757800 |
| H  | -3.88738800  | 13.34194400 | -2.50763200 |
| H  | -4.54638200  | 14.50817100 | -3.66508000 |
| H  | -3.11233900  | 13.56538800 | -4.09049500 |
| C  | -5.14276800  | 12.89055900 | -5.68168200 |
| H  | -5.84648500  | 12.24561000 | -6.21251300 |
| H  | -4.18412000  | 12.89178600 | -6.21342000 |
| H  | -5.53933700  | 13.91103000 | -5.70743000 |
| B  | -4.73044100  | 8.80476900  | -2.95718800 |
| B  | -7.44401200  | 6.19942500  | -1.61428300 |
| Cl | -8.85219000  | 7.11951100  | -0.89131400 |
| C  | -5.06183900  | 10.24576100 | -3.30656600 |
| Cl | -3.32196200  | 7.88493600  | -3.67988100 |
| C  | -8.99503500  | 4.23971900  | 0.23250700  |
| C  | -10.23918400 | 4.09165100  | -0.40548800 |
| C  | -8.89398400  | 4.78186600  | 1.52644000  |
| C  | -11.38788100 | 4.41363300  | 0.31689900  |
| C  | -10.07309800 | 5.09170700  | 2.20149900  |
| C  | -11.31167900 | 4.89413200  | 1.61321800  |
| H  | -12.35871400 | 4.30698300  | -0.16181800 |
| H  | -12.21897800 | 5.14186900  | 2.15684500  |
| H  | -10.01288800 | 5.51742400  | 3.20055900  |
| C  | -7.57247600  | 5.13976300  | 2.18868700  |
| C  | -7.41388400  | 4.45952100  | 3.55234300  |
| H  | -7.57350500  | 3.37871900  | 3.51364200  |
| H  | -8.13509000  | 4.87216200  | 4.26825200  |
| H  | -6.41436400  | 4.64645900  | 3.96080900  |
| C  | -7.45080300  | 6.65524900  | 2.38445100  |
| H  | -6.75347500  | 4.83011900  | 1.52549400  |
| H  | -6.48853600  | 6.89617600  | 2.85153300  |
| H  | -8.24236500  | 7.02326900  | 3.04925100  |

|   |              |             |             |
|---|--------------|-------------|-------------|
| H | -7.52533900  | 7.19965700  | 1.44122300  |
| C | -10.39666300 | 3.71382700  | -1.87042900 |
| C | -11.25649600 | 2.46161500  | -2.06464800 |
| H | -11.31552700 | 2.20151100  | -3.12751200 |
| H | -12.28161500 | 2.64973400  | -1.72250600 |
| H | -10.88456400 | 1.59010000  | -1.52108600 |
| C | -11.04023700 | 4.86212100  | -2.65826400 |
| H | -9.39805100  | 3.54243400  | -2.29280500 |
| H | -11.08304500 | 4.60843100  | -3.72404800 |
| H | -10.49234600 | 5.79961800  | -2.54558100 |
| H | -12.06995800 | 5.03134700  | -2.31949300 |
| C | -3.17971600  | 10.76457200 | -4.80414400 |
| C | -1.93548000  | 10.91280500 | -4.16640000 |
| C | -2.10194400  | 9.91244000  | -6.77324000 |
| C | -0.86327200  | 10.11016400 | -6.18519000 |
| C | -0.78688400  | 10.59081400 | -4.88893900 |
| H | 0.04395100   | 9.86241600  | -6.72893800 |
| H | 0.18402100   | 10.69757900 | -4.41039400 |
| C | -1.77783200  | 11.29082700 | -2.70152500 |
| C | -1.13384300  | 10.14285200 | -1.91358000 |
| H | -1.68174700  | 9.20527600  | -2.02558600 |
| H | -1.09053400  | 10.39699100 | -0.84792300 |
| H | -0.10426500  | 9.97355500  | -2.25273800 |
| C | -0.91819900  | 12.54325200 | -2.50767700 |
| H | -2.77641200  | 11.46210800 | -2.27900000 |
| H | -0.85920400  | 12.80369700 | -1.44489500 |
| H | -1.29023900  | 13.41453900 | -3.05152500 |
| H | 0.10694800   | 12.35516800 | -2.84976100 |
| C | -3.28096000  | 10.22228400 | -6.09801200 |
| C | -4.60255400  | 9.86419400  | -6.75998200 |
| C | -4.72411200  | 8.34866900  | -6.95552700 |
| H | -5.68656100  | 8.10755300  | -7.42214000 |
| H | -4.64906600  | 7.80438100  | -6.01227100 |
| H | -3.93280100  | 7.98068900  | -7.62065100 |

|   |             |             |             |
|---|-------------|-------------|-------------|
| C | -4.76145300 | 10.54424900 | -8.12369500 |
| H | -5.42147600 | 10.17383300 | -6.09668500 |
| H | -4.60193600 | 11.62507200 | -8.08516000 |
| H | -5.76102400 | 10.35715500 | -8.53196600 |
| H | -4.04032800 | 10.13159300 | -8.83967700 |
| H | -2.16229500 | 9.48660900  | -7.77224300 |
| C | -8.29708700 | 6.77471800  | -4.39536500 |
| H | -8.53845400 | 5.75886400  | -4.04701100 |
| H | -9.01058300 | 7.45312100  | -3.90940700 |
| H | -8.47414100 | 6.80687100  | -5.47477900 |
| C | -3.87706600 | 8.22857400  | -0.17617000 |
| H | -3.16403400 | 7.55002300  | -0.66259600 |
| H | -3.63531200 | 9.24442500  | -0.52418800 |
| H | -3.69978400 | 8.19587900  | 0.90318600  |

**4. CAAC\_Full\_C<sub>2</sub>H<sub>5</sub>\_Cl (twisted)-triplet:**

|   |             |            |             |
|---|-------------|------------|-------------|
| C | -5.99965900 | 3.96355700 | -1.95205400 |
| N | -7.79795300 | 3.89479900 | -0.47143000 |
| C | -5.86041800 | 2.73477500 | -1.03956400 |
| C | -7.20737400 | 2.53193100 | -0.34746800 |
| H | -5.09638600 | 2.94806200 | -0.27829000 |
| H | -5.53820200 | 1.84411600 | -1.59198400 |
| C | -7.11279200 | 4.75836800 | -1.26465600 |
| C | -6.58010100 | 7.12072600 | -2.54775400 |
| C | -5.59466400 | 7.88350200 | -2.02380400 |
| C | -6.86523500 | 7.15115300 | -4.03948700 |
| H | -6.62887900 | 8.14656300 | -4.45372700 |
| H | -6.15867800 | 6.47039200 | -4.55226200 |

|   |             |             |             |
|---|-------------|-------------|-------------|
| C | -5.30951300 | 7.85289500  | -0.53207700 |
| H | -5.54626600 | 6.85754800  | -0.11789300 |
| H | -6.01579100 | 8.53390500  | -0.01925000 |
| C | -6.47629300 | 3.56432400  | -3.35781600 |
| H | -6.56068200 | 4.44875900  | -3.99580500 |
| H | -7.45444100 | 3.07298800  | -3.34280000 |
| H | -5.75368900 | 2.88012400  | -3.82257100 |
| C | -4.64572500 | 4.66224300  | -2.08306600 |
| H | -3.88324600 | 3.91070600  | -2.32645400 |
| H | -4.34923100 | 5.14992600  | -1.14597000 |
| H | -4.63432100 | 5.41513100  | -2.87488700 |
| C | -7.03288600 | 2.11191500  | 1.10970200  |
| H | -6.32867600 | 2.75571900  | 1.64127400  |
| H | -6.63728300 | 1.09104800  | 1.13462300  |
| H | -7.99162500 | 2.11108000  | 1.64128300  |
| C | -8.10150700 | 1.47982000  | -1.00526100 |
| H | -8.28807200 | 1.66453000  | -2.06495200 |
| H | -9.06309100 | 1.43917000  | -0.48232500 |
| H | -7.62936000 | 0.49648700  | -0.90909500 |
| C | -6.17511300 | 11.04071700 | -2.61962300 |
| N | -4.37664800 | 11.10946400 | -4.10004800 |
| C | -6.31429800 | 12.26943800 | -3.53220300 |
| C | -4.96725000 | 12.47231000 | -4.22412100 |
| H | -6.63662600 | 13.16011400 | -2.97987600 |
| H | -7.07821500 | 12.05607400 | -4.29357000 |
| C | -5.69868900 | 11.44007700 | -1.21383000 |
| H | -4.72054600 | 11.93142100 | -1.22873500 |
| H | -5.61441500 | 10.55568000 | -0.57575400 |
| H | -6.42137400 | 12.12431000 | -0.74925100 |
| C | -7.52901600 | 10.34196700 | -2.48869400 |
| H | -7.54038300 | 9.58899600  | -1.69694500 |
| H | -7.82548800 | 9.85437600  | -3.42584300 |
| H | -8.29152500 | 11.09345100 | -2.24523600 |
| C | -4.07322400 | 13.52444900 | -3.56622700 |



|    |              |             |             |
|----|--------------|-------------|-------------|
| H  | -3.88661400  | 13.33966000 | -2.50656000 |
| H  | -4.54544900  | 14.50775300 | -3.66230900 |
| H  | -3.11165000  | 13.56522400 | -4.08916900 |
| C  | -5.14157100  | 12.89228000 | -5.68132100 |
| H  | -5.84576700  | 12.24848100 | -6.21291800 |
| H  | -4.18278900  | 12.89304500 | -6.21282500 |
| H  | -5.53713200  | 13.91316100 | -5.70632000 |
| B  | -4.73071200  | 8.80485300  | -2.95790000 |
| B  | -7.44401700  | 6.19940000  | -1.61360800 |
| Cl | -8.85140600  | 7.11982600  | -0.89007100 |
| C  | -5.06187600  | 10.24591200 | -3.30685600 |
| Cl | -3.32293400  | 7.88464200  | -3.68097500 |
| C  | -8.99484500  | 4.23959300  | 0.23313000  |
| C  | -10.23906600 | 4.09258500  | -0.40499600 |
| C  | -8.89356900  | 4.78073400  | 1.52746200  |
| C  | -11.38760300 | 4.41442100  | 0.31772500  |
| C  | -10.07250600 | 5.09064000  | 2.20279500  |
| C  | -11.31117800 | 4.89393600  | 1.61440100  |
| H  | -12.35850800 | 4.30846500  | -0.16100400 |
| H  | -12.21837300 | 5.14159600  | 2.15823600  |
| H  | -10.01209700 | 5.51562700  | 3.20215600  |
| C  | -7.57179800  | 5.13745800  | 2.18977700  |
| C  | -7.41367400  | 4.45687600  | 3.55329100  |
| H  | -7.57425400  | 3.37621500  | 3.51433800  |
| H  | -8.13441000  | 4.86999200  | 4.26939900  |
| H  | -6.41393200  | 4.64281800  | 3.96167000  |
| C  | -7.44891900  | 6.65282100  | 2.38548500  |
| H  | -6.75308000  | 4.82719400  | 1.52654700  |
| H  | -6.48670500  | 6.89304600  | 2.85303900  |
| H  | -8.24057200  | 7.02162900  | 3.04974200  |
| H  | -7.52248800  | 7.19711600  | 1.44210500  |
| C  | -10.39681400 | 3.71614600  | -1.87029300 |
| C  | -11.25618600 | 2.46375700  | -2.06553600 |
| H  | -11.31605700 | 2.20518100  | -3.12872700 |

|   |              |             |             |
|---|--------------|-------------|-------------|
| H | -12.28107700 | 2.65096500  | -1.72219600 |
| H | -10.88341700 | 1.59161600  | -1.52359100 |
| C | -11.04140400 | 4.86483000  | -2.65678500 |
| H | -9.39820600  | 3.54577100  | -2.29320300 |
| H | -11.08343900 | 4.61256700  | -3.72293600 |
| H | -10.49470200 | 5.80282200  | -2.54258000 |
| H | -12.07148900 | 5.03230400  | -2.31825300 |
| C | -3.17978000  | 10.76459300 | -4.80460300 |
| C | -1.93552700  | 10.91177400 | -4.16663100 |
| C | -2.10225100  | 9.91319200  | -6.77420100 |
| C | -0.86353900  | 10.10998600 | -6.18592000 |
| C | -0.78703800  | 10.58975500 | -4.88934600 |
| H | 0.04362300   | 9.86219600  | -6.72975300 |
| H | 0.18389500   | 10.69578600 | -4.41068700 |
| C | -1.77770800  | 11.28851500 | -2.70141200 |
| C | -1.13288400  | 10.14018400 | -1.91461200 |
| H | -1.67969100  | 9.20216000  | -2.02802400 |
| H | -1.09041800  | 10.39304700 | -0.84861700 |
| H | -0.10293100  | 9.97248000  | -2.25341400 |
| C | -0.91840400  | 12.54103500 | -2.50658800 |
| H | -2.77629800  | 11.45893600 | -2.27845400 |
| H | -0.85868800  | 12.80008600 | -1.44350400 |
| H | -1.29108800  | 13.41292800 | -3.04898600 |
| H | 0.10653900   | 12.35368300 | -2.84969500 |
| C | -3.28114000  | 10.22322300 | -6.09884600 |
| C | -4.60294000  | 9.86640100  | -6.76106100 |
| C | -4.72579100  | 8.35101200  | -6.95661300 |
| H | -5.68819800  | 8.11067500  | -7.42371400 |
| H | -4.65173700  | 7.80677500  | -6.01324100 |
| H | -3.93441100  | 7.98223900  | -7.62121500 |
| C | -4.76111400  | 10.54681300 | -8.12465800 |
| H | -5.42165000  | 10.17672500 | -6.09784200 |
| H | -4.60053000  | 11.62747700 | -8.08585700 |
| H | -5.76086600  | 10.36081200 | -8.53298400 |

|   |             |             |             |
|---|-------------|-------------|-------------|
| H | -4.04039700 | 10.13360400 | -8.84073000 |
| H | -2.16272700 | 9.48803300  | -7.77348500 |
| C | -8.29676500 | 6.76854100  | -4.39280000 |
| H | -8.53411200 | 5.75365200  | -4.03826100 |
| H | -9.01212600 | 7.44685300  | -3.90942200 |
| H | -8.47539000 | 6.79418500  | -5.47211300 |
| C | -3.87782800 | 8.23478100  | -0.17872800 |
| H | -3.16290500 | 7.55637300  | -0.66263000 |
| H | -3.64007300 | 9.24971500  | -0.53276300 |
| H | -3.69902700 | 8.20842500  | 0.90053300  |

**5. CAAC\_Full\_C<sub>2</sub>H<sub>5</sub>\_Cl (planar)-singlet:**

|   |             |            |             |
|---|-------------|------------|-------------|
| C | -6.16912200 | 4.03383100 | -1.12523100 |
| N | -8.38602600 | 3.40970200 | -1.51837300 |
| C | -6.70038300 | 3.13545500 | 0.00607500  |
| C | -7.85974300 | 2.36246300 | -0.59545600 |
| H | -7.09928200 | 3.77318400 | 0.80967600  |
| H | -5.92393500 | 2.49301200 | 0.43544400  |
| C | -7.46336300 | 4.32411700 | -1.93356100 |
| C | -6.65391600 | 6.70997800 | -3.06235600 |
| C | -6.90214700 | 7.93038200 | -3.65859400 |
| C | -5.50531600 | 5.93556100 | -3.75726300 |
| H | -4.90394900 | 5.34325300 | -3.06867000 |
| H | -4.80853200 | 6.63549100 | -4.22249900 |
| C | -8.05073600 | 8.70477300 | -2.96359000 |
| H | -8.74729800 | 8.00478400 | -2.49810100 |
| H | -8.65236300 | 9.29686100 | -3.65215300 |
| C | -5.09048300 | 3.25877900 | -1.94098600 |

|   |             |             |             |
|---|-------------|-------------|-------------|
| H | -4.88458200 | 2.28179100  | -1.49190900 |
| H | -4.14290800 | 3.80660500  | -1.95873300 |
| H | -5.38964800 | 3.08653900  | -2.98098800 |
| C | -5.56885600 | 5.28579800  | -0.46952600 |
| H | -4.80202900 | 4.97264000  | 0.25191900  |
| H | -6.34600900 | 5.83347900  | 0.07732500  |
| H | -5.10261700 | 5.98220500  | -1.16958800 |
| C | -8.87155000 | 1.93119500  | 0.45978300  |
| H | -9.09682000 | 2.72925000  | 1.16908000  |
| H | -8.44095300 | 1.09765300  | 1.02424700  |
| H | -9.80587000 | 1.57849800  | 0.00847600  |
| C | -7.44946800 | 1.10945600  | -1.37341100 |
| H | -6.78848600 | 1.32478400  | -2.21466500 |
| H | -8.34513800 | 0.61151700  | -1.75769000 |
| H | -6.94047700 | 0.40964800  | -0.70122100 |
| C | -7.38730900 | 10.60638800 | -5.59570900 |
| N | -5.17046900 | 11.23082800 | -5.20266700 |
| C | -6.85620700 | 11.50478900 | -6.72706900 |
| C | -5.69693400 | 12.27796300 | -6.12559700 |
| H | -7.63275400 | 12.14711000 | -7.15644400 |
| H | -6.45724600 | 10.86708400 | -7.53065700 |
| C | -8.46604200 | 11.38133000 | -4.77997700 |
| H | -8.67192900 | 12.35835400 | -5.22898000 |
| H | -8.16700000 | 11.55348400 | -3.73993300 |
| H | -9.41359900 | 10.83346400 | -4.76238600 |
| C | -7.98741200 | 9.35430200  | -6.25134400 |
| H | -8.45358000 | 8.65787700  | -5.55124900 |
| H | -7.21018100 | 8.80668400  | -6.79815000 |
| H | -8.75426800 | 9.66732300  | -6.97281900 |
| C | -6.10737100 | 13.53094500 | -5.34767600 |
| H | -6.76811100 | 13.31552700 | -4.50625400 |
| H | -6.61670200 | 14.23054400 | -6.01982800 |
| H | -5.21175600 | 14.02918100 | -4.96365000 |
| C | -4.68522000 | 12.70934400 | -7.18087400 |

|   |              |             |             |
|---|--------------|-------------|-------------|
| H | -4.45976500  | 11.91126500 | -7.89008600 |
| H | -3.75098500  | 13.06229400 | -6.72959400 |
| H | -5.11600300  | 13.54273400 | -7.74542400 |
| B | -5.80495900  | 8.95387800  | -4.12148100 |
| B | -7.75120800  | 5.68656600  | -2.59951400 |
| C | -6.09299400  | 10.31629700 | -4.78742500 |
| C | -9.73744200  | 3.33059600  | -1.98154100 |
| C | -10.03953600 | 2.68424200  | -3.19101300 |
| C | -10.73161900 | 3.95732000  | -1.21170900 |
| C | -11.37704600 | 2.63244000  | -3.58447100 |
| C | -12.04928500 | 3.88653100  | -1.65595500 |
| C | -12.37547500 | 3.22014300  | -2.82649400 |
| H | -11.63120700 | 2.14257300  | -4.52175600 |
| H | -13.40882900 | 3.17603000  | -3.15861400 |
| H | -12.82902900 | 4.38182400  | -1.08183100 |
| C | -10.42927700 | 4.77489000  | 0.03426400  |
| C | -11.28816300 | 4.31957800  | 1.21919100  |
| H | -11.27823100 | 3.23333900  | 1.35309800  |
| H | -12.33240400 | 4.62179700  | 1.07533800  |
| H | -10.94500000 | 4.78839100  | 2.14814900  |
| C | -10.66710900 | 6.26972100  | -0.20402200 |
| H | -9.36751000  | 4.64900200  | 0.28705100  |
| H | -10.54540500 | 6.82277700  | 0.73454400  |
| H | -11.68796600 | 6.44452800  | -0.56633500 |
| H | -9.97558100  | 6.68648300  | -0.94040300 |
| C | -8.99199700  | 2.13984800  | -4.14844600 |
| C | -9.19828400  | 0.64900700  | -4.43385600 |
| H | -8.38588900  | 0.26081300  | -5.05809500 |
| H | -10.13248800 | 0.49656300  | -4.98834700 |
| H | -9.25647000  | 0.03924000  | -3.52838000 |
| C | -9.02309800  | 2.89443900  | -5.48355900 |
| H | -7.99891600  | 2.29202100  | -3.70473500 |
| H | -8.22524300  | 2.52697200  | -6.13970300 |
| H | -8.89740500  | 3.97109000  | -5.35360400 |

|   |             |             |             |
|---|-------------|-------------|-------------|
| H | -9.97686400 | 2.72433900  | -5.99822200 |
| C | -3.81899100 | 11.31000900 | -4.73970300 |
| C | -3.51677000 | 11.95645100 | -3.53031300 |
| C | -1.50717400 | 10.75413800 | -5.06554500 |
| C | -1.18085700 | 11.42063400 | -3.89510200 |
| C | -2.17921200 | 12.00834600 | -3.13703400 |
| H | -0.14746000 | 11.46481500 | -3.56312100 |
| H | -1.92495100 | 12.49828300 | -2.19981300 |
| C | -4.56423200 | 12.50080400 | -2.57277100 |
| C | -4.53292000 | 11.74625800 | -1.23763600 |
| H | -4.65870200 | 10.66960600 | -1.36753400 |
| H | -5.33064200 | 12.11378900 | -0.58136600 |
| H | -3.57905700 | 11.91632400 | -0.72314500 |
| C | -4.35804200 | 13.99167200 | -2.28746300 |
| H | -5.55735400 | 12.34852600 | -3.01634600 |
| H | -5.17034700 | 14.37980400 | -1.66306700 |
| H | -4.30012500 | 14.60139900 | -3.19298300 |
| H | -3.42373500 | 14.14424600 | -1.73317900 |
| C | -2.82489300 | 10.68325300 | -5.50961800 |
| C | -3.12734500 | 9.86560000  | -6.75551200 |
| C | -2.88934700 | 8.37079500  | -6.51722300 |
| H | -3.01111600 | 7.81771300  | -7.45576600 |
| H | -3.58073800 | 7.95396800  | -5.78075000 |
| H | -1.86842500 | 8.19609400  | -6.15504300 |
| C | -2.26865400 | 10.32092400 | -7.94058000 |
| H | -4.18915600 | 9.99140200  | -7.00816400 |
| H | -2.27866200 | 11.40715800 | -8.07452400 |
| H | -2.61192600 | 9.85206100  | -8.86947200 |
| H | -1.22437500 | 10.01876700 | -7.79686700 |
| H | -0.72748100 | 10.25883200 | -5.63973100 |
| C | -7.51744700 | 9.60643500  | -1.84415700 |
| H | -6.87616100 | 9.02529900  | -1.16758700 |
| H | -6.90937000 | 10.43849900 | -2.22148800 |
| H | -8.33915400 | 10.03309500 | -1.25631800 |

|    |             |            |             |
|----|-------------|------------|-------------|
| C  | -6.03856400 | 5.03410500 | -4.87687900 |
| H  | -5.21683800 | 4.60739200 | -5.46465300 |
| H  | -6.64679100 | 4.20208300 | -4.49969700 |
| H  | -6.67968800 | 5.61539500 | -5.55347200 |
| Cl | -9.34865800 | 5.86368800 | -3.50493800 |
| Cl | -4.20746600 | 8.77696500 | -3.21613300 |

**6. CAAC\_Full\_C<sub>2</sub>H<sub>5</sub>\_Cl (planar)-triplet:**

|   |             |            |             |
|---|-------------|------------|-------------|
| C | -6.17253600 | 4.03464700 | -1.13323000 |
| N | -8.38996600 | 3.40378400 | -1.52081300 |
| C | -6.70046900 | 3.13978600 | 0.00224300  |
| C | -7.86017500 | 2.36236800 | -0.59457500 |
| H | -7.09916300 | 3.78031200 | 0.80377100  |
| H | -5.92281700 | 2.49972200 | 0.43315900  |
| C | -7.46788800 | 4.31980300 | -1.93904800 |
| C | -6.65396400 | 6.71243300 | -3.06669600 |
| C | -6.90222600 | 7.92804200 | -3.65421700 |
| C | -5.51994900 | 5.93513300 | -3.78115300 |
| H | -4.90455000 | 5.34557400 | -3.10167200 |
| H | -4.83527900 | 6.63981400 | -4.25935000 |
| C | -8.03625800 | 8.70532500 | -2.93974300 |
| H | -8.72080100 | 8.00060700 | -2.46140800 |
| H | -8.65178200 | 9.29474000 | -3.61924000 |
| C | -5.09443200 | 3.26007800 | -1.94993400 |
| H | -4.88508100 | 2.28440200 | -1.49957700 |
| H | -4.14785300 | 3.80946800 | -1.97183100 |
| H | -5.39692100 | 3.08513000 | -2.98869000 |
| C | -5.57321800 | 5.29115000 | -0.48601000 |

|   |             |             |             |
|---|-------------|-------------|-------------|
| H | -4.80426200 | 4.98462300  | 0.23584400  |
| H | -6.35032300 | 5.84115800  | 0.05892600  |
| H | -5.10821500 | 5.98369600  | -1.19111600 |
| C | -8.86997300 | 1.93488700  | 0.46401900  |
| H | -9.09395700 | 2.73606400  | 1.17026300  |
| H | -8.43918600 | 1.10330000  | 1.03121500  |
| H | -9.80514100 | 1.58098600  | 0.01528100  |
| C | -7.44813100 | 1.10640700  | -1.36683000 |
| H | -6.79013600 | 1.31960900  | -2.21102700 |
| H | -8.34336300 | 0.60395400  | -1.74622300 |
| H | -6.93520600 | 0.41134700  | -0.69265000 |
| C | -7.38389900 | 10.60574200 | -5.58771300 |
| N | -5.16651900 | 11.23681200 | -5.20016000 |
| C | -6.85605700 | 11.50069200 | -6.72316600 |
| C | -5.69646900 | 12.27824000 | -6.12628900 |
| H | -7.63377900 | 12.14066200 | -7.15409200 |
| H | -6.45725700 | 10.86023700 | -7.52469800 |
| C | -8.46214400 | 11.38016600 | -4.77105200 |
| H | -8.67152500 | 12.35585800 | -5.22135800 |
| H | -8.15976800 | 11.55506300 | -3.73225400 |
| H | -9.40868600 | 10.83070900 | -4.74929000 |
| C | -7.98301800 | 9.34915200  | -6.23495600 |
| H | -8.44793400 | 8.65653300  | -5.52986000 |
| H | -7.20581300 | 8.79926300  | -6.77987300 |
| H | -8.75200300 | 9.65556500  | -6.95682700 |
| C | -6.10875100 | 13.53405400 | -5.35390700 |
| H | -6.76659500 | 13.32060900 | -4.50965300 |
| H | -6.62194700 | 14.22901500 | -6.02798400 |
| H | -5.21362700 | 14.03674100 | -4.97456900 |
| C | -4.68672900 | 12.70598100 | -7.18482400 |
| H | -4.46248300 | 11.90485400 | -7.89104500 |
| H | -3.75168500 | 13.06013800 | -6.73603200 |
| H | -5.11771300 | 13.53744500 | -7.75205200 |
| B | -5.79972100 | 8.95792200  | -4.12299100 |



|   |              |             |             |
|---|--------------|-------------|-------------|
| B | -7.75654700  | 5.68261600  | -2.59795500 |
| C | -6.08850500  | 10.32071700 | -4.78189200 |
| C | -9.74033300  | 3.32296200  | -1.98579400 |
| C | -10.04079500 | 2.67395400  | -3.19449900 |
| C | -10.73680200 | 3.95121500  | -1.21974000 |
| C | -11.37772800 | 2.61967400  | -3.58964800 |
| C | -12.05395000 | 3.87762100  | -1.66534800 |
| C | -12.37801300 | 3.20764000  | -2.83433700 |
| H | -11.63010000 | 2.12680700  | -4.52584600 |
| H | -13.41094300 | 3.16099100  | -3.16743800 |
| H | -12.83500300 | 4.37313000  | -1.09315500 |
| C | -10.43764800 | 4.77268000  | 0.02432000  |
| C | -11.29302200 | 4.31609600  | 1.21129200  |
| H | -11.27600800 | 3.23055400  | 1.34948500  |
| H | -12.33926700 | 4.61086100  | 1.06640300  |
| H | -10.95277800 | 4.79070900  | 2.13839700  |
| C | -10.68484500 | 6.26524500  | -0.21812000 |
| H | -9.37473500  | 4.65324100  | 0.27582300  |
| H | -10.55415800 | 6.82387800  | 0.71589600  |
| H | -11.71094300 | 6.43371000  | -0.56848700 |
| H | -10.00459000 | 6.68091000  | -0.96550100 |
| C | -8.99196600  | 2.12675600  | -4.14886000 |
| C | -9.19408300  | 0.63370200  | -4.42563600 |
| H | -8.38210200  | 0.24480400  | -5.05000700 |
| H | -10.12933900 | 0.47545000  | -4.97674500 |
| H | -9.24782000  | 0.02855900  | -3.51687500 |
| C | -9.02624700  | 2.87300500  | -5.48863900 |
| H | -7.99930000  | 2.28455500  | -3.70604400 |
| H | -8.22385500  | 2.50854500  | -6.14091400 |
| H | -8.91016500  | 3.95146400  | -5.36498400 |
| H | -9.97724800  | 2.69162800  | -6.00452200 |
| C | -3.81604400  | 11.31754800 | -4.73548000 |
| C | -3.51527200  | 11.96656200 | -3.52685900 |
| C | -1.50255500  | 10.76263000 | -5.05637400 |

|   |             |             |             |
|---|-------------|-------------|-------------|
| C | -1.17818600 | 11.43261400 | -3.88747300 |
| C | -2.17825400 | 12.02072100 | -3.13198200 |
| H | -0.14518500 | 11.47915800 | -3.55457800 |
| H | -1.92563900 | 12.51358800 | -2.19584900 |
| C | -4.56386600 | 12.51390700 | -2.57233100 |
| C | -4.52947500 | 11.76771000 | -1.23252700 |
| H | -4.64598100 | 10.68927900 | -1.35610300 |
| H | -5.33156100 | 12.13248800 | -0.58005400 |
| H | -3.57827100 | 11.94877100 | -0.71690800 |
| C | -4.36150300 | 14.00695200 | -2.29569300 |
| H | -5.55662400 | 12.35621300 | -3.01496900 |
| H | -5.17338800 | 14.39604800 | -1.67132000 |
| H | -4.30771600 | 14.61198300 | -3.20453100 |
| H | -3.42618800 | 14.16511500 | -1.74465900 |
| C | -2.81979800 | 10.68916300 | -5.50172000 |
| C | -3.11928600 | 9.86770300  | -6.74570600 |
| C | -2.87232100 | 8.37510700  | -6.50324900 |
| H | -3.00317000 | 7.81647700  | -7.43724300 |
| H | -3.55260400 | 7.95957400  | -5.75581700 |
| H | -1.84623100 | 8.20647200  | -6.15294100 |
| C | -2.26402700 | 10.32411300 | -7.93282700 |
| H | -4.18221300 | 9.98731500  | -6.99706400 |
| H | -2.28084500 | 11.40966400 | -8.07099400 |
| H | -2.60453900 | 9.84958800  | -8.85987700 |
| H | -1.21781500 | 10.02913300 | -7.78813700 |
| H | -0.72166600 | 10.26702300 | -5.62870600 |
| C | -7.48832100 | 9.60889900  | -1.82916700 |
| H | -6.84200000 | 9.02761400  | -1.15763400 |
| H | -6.88295800 | 10.43910600 | -2.21431600 |
| H | -8.30321600 | 10.03943800 | -1.23515000 |
| C | -6.06791200 | 5.03173300  | -4.89185800 |
| H | -5.25303300 | 4.60114500  | -5.48586200 |
| H | -6.67340500 | 4.20157600  | -4.50682700 |
| H | -6.71411900 | 5.61316100  | -5.56337900 |

|    |             |            |             |
|----|-------------|------------|-------------|
| Cl | -9.34017000 | 5.85796900 | -3.52386200 |
| Cl | -4.21606600 | 8.78266300 | -3.19713000 |

**7. CAAC\_Full\_CH<sub>3</sub>\_Cl** (fully optimized)-singlet:

|   |             |            |             |
|---|-------------|------------|-------------|
| C | -5.74013100 | 3.95074500 | -1.56385100 |
| N | -7.63708900 | 3.85956900 | -0.20517900 |
| C | -5.72791900 | 2.65709400 | -0.72479800 |
| C | -7.13996100 | 2.45534000 | -0.18651400 |
| H | -5.04319000 | 2.79978500 | 0.12385600  |
| H | -5.37241900 | 1.79260400 | -1.29721900 |
| C | -6.91298300 | 4.72476500 | -0.95712300 |
| C | -6.52650500 | 7.01156400 | -2.40495400 |
| C | -5.48504100 | 7.85209400 | -2.23128100 |
| C | -7.28111000 | 6.96560600 | -3.71230500 |
| H | -7.46870100 | 5.93556100 | -4.04558500 |
| H | -6.76045900 | 7.50681100 | -4.51861300 |
| H | -8.27646600 | 7.42406800 | -3.59757100 |
| C | -4.73044500 | 7.89806100 | -0.92392400 |
| H | -4.54279200 | 8.92810900 | -0.59068600 |
| H | -3.73511700 | 7.43953500 | -1.03862400 |
| H | -5.25113800 | 7.35692000 | -0.11759800 |
| C | -5.98643900 | 3.69416800 | -3.05954700 |
| H | -5.77436300 | 4.60499200 | -3.62990100 |
| H | -7.02016800 | 3.39696700 | -3.27318000 |
| H | -5.31482800 | 2.90783800 | -3.42762200 |
| C | -4.38407800 | 4.64347100 | -1.41671900 |
| H | -3.58745500 | 3.92708000 | -1.65679800 |
| H | -4.22961000 | 4.98943500 | -0.38728600 |

|    |             |             |             |
|----|-------------|-------------|-------------|
| H  | -4.28379300 | 5.49326000  | -2.09711800 |
| C  | -7.15924400 | 1.85618400  | 1.21683200  |
| H  | -6.45830400 | 2.35274900  | 1.89125800  |
| H  | -6.87166200 | 0.80190100  | 1.15490700  |
| H  | -8.16462200 | 1.90164400  | 1.65269500  |
| C  | -7.99545800 | 1.55281000  | -1.07889400 |
| H  | -7.98261900 | 1.85839600  | -2.12744500 |
| H  | -9.03162400 | 1.54439900  | -0.72515200 |
| H  | -7.61372400 | 0.52805100  | -1.02167100 |
| C  | -6.27140100 | 10.91291900 | -3.07235600 |
| N  | -4.37444900 | 11.00410400 | -4.43103800 |
| C  | -6.28362300 | 12.20657100 | -3.91140500 |
| C  | -4.87158200 | 12.40833300 | -4.44968500 |
| H  | -6.63912700 | 13.07105700 | -3.33898200 |
| H  | -6.96835100 | 12.06387700 | -4.76005900 |
| C  | -6.02506400 | 11.16949100 | -1.57666400 |
| H  | -4.99132200 | 11.46666300 | -1.36304600 |
| H  | -6.23715900 | 10.25867400 | -1.00630600 |
| H  | -6.69664600 | 11.95584200 | -1.20857900 |
| C  | -7.62746000 | 10.22020100 | -3.21946800 |
| H  | -7.72774000 | 9.37040600  | -2.53907600 |
| H  | -7.78195200 | 9.87424900  | -4.24890000 |
| H  | -8.42407300 | 10.93659600 | -2.97936600 |
| C  | -4.01609100 | 13.31084900 | -3.55728600 |
| H  | -4.02893000 | 13.00523800 | -2.50874200 |
| H  | -4.39783200 | 14.33560700 | -3.61448600 |
| H  | -2.97992500 | 13.31927500 | -3.91102900 |
| C  | -4.85229900 | 13.00751200 | -5.85301900 |
| H  | -5.55323900 | 12.51095700 | -6.52745200 |
| H  | -3.84692100 | 12.96206200 | -6.28888200 |
| H  | -5.13988300 | 14.06179400 | -5.79107700 |
| B  | -4.81412600 | 8.67342700  | -3.38350500 |
| B  | -7.19743300 | 6.19023100  | -1.25273900 |
| Cl | -8.46473100 | 7.20229600  | -0.40531400 |

|    |              |             |             |
|----|--------------|-------------|-------------|
| C  | -5.09855700  | 10.13890000 | -3.67910300 |
| Cl | -3.54687400  | 7.66135600  | -4.23099000 |
| C  | -8.84576800  | 4.24321000  | 0.45260700  |
| C  | -10.05432800 | 4.26643000  | -0.26256500 |
| C  | -8.76380800  | 4.69609000  | 1.77971900  |
| C  | -11.19965800 | 4.69345500  | 0.40920400  |
| C  | -9.93653000  | 5.11469500  | 2.40365100  |
| C  | -11.14789300 | 5.10494400  | 1.73041100  |
| H  | -12.14467900 | 4.72648600  | -0.12835900 |
| H  | -12.05135700 | 5.44160300  | 2.23094100  |
| H  | -9.89065100  | 5.48048400  | 3.42700200  |
| C  | -7.44858300  | 4.83457900  | 2.52867900  |
| C  | -7.48388000  | 4.08341400  | 3.86211400  |
| H  | -7.80322800  | 3.04281500  | 3.74729500  |
| H  | -8.17937100  | 4.56596800  | 4.55933000  |
| H  | -6.49593700  | 4.09169100  | 4.33608400  |
| C  | -7.10408500  | 6.30570800  | 2.77997000  |
| H  | -6.64750600  | 4.42040800  | 1.90430100  |
| H  | -6.19912400  | 6.37890000  | 3.39415200  |
| H  | -7.91558700  | 6.81095200  | 3.31844400  |
| H  | -6.93385600  | 6.84918800  | 1.84674500  |
| C  | -10.16554900 | 3.94300700  | -1.74369300 |
| C  | -11.18544900 | 2.83121100  | -2.00597600 |
| H  | -11.17543700 | 2.54133200  | -3.06245900 |
| H  | -12.19959700 | 3.18077900  | -1.77703700 |
| H  | -11.00655000 | 1.93635100  | -1.40286900 |
| C  | -10.56565800 | 5.18084500  | -2.55264200 |
| H  | -9.18129800  | 3.62420500  | -2.10537300 |
| H  | -10.66154200 | 4.92099800  | -3.61326200 |
| H  | -9.83328800  | 5.98598900  | -2.45949800 |
| H  | -11.53507100 | 5.56961500  | -2.21691100 |
| C  | -3.16573600  | 10.62049600 | -5.08878600 |
| C  | -1.95720200  | 10.59726900 | -4.37356500 |
| C  | -2.07486800  | 9.74911900  | -7.03982400 |

|   |             |             |             |
|---|-------------|-------------|-------------|
| C | -0.86353500 | 9.75886000  | -6.36653200 |
| C | -0.81183600 | 10.17029300 | -5.04530500 |
| H | 0.03995800  | 9.42224000  | -6.86703700 |
| H | 0.13316400  | 10.13726200 | -4.50770500 |
| C | -1.84603900 | 10.92063100 | -2.89241700 |
| C | -1.44593200 | 9.68276100  | -2.08352100 |
| H | -2.17820600 | 8.87755100  | -2.17684700 |
| H | -1.35023000 | 9.94252400  | -1.02286400 |
| H | -0.47642700 | 9.29412100  | -2.41914100 |
| C | -0.82616500 | 12.03242600 | -2.63003500 |
| H | -2.83030800 | 11.23939800 | -2.53075200 |
| H | -0.83616700 | 12.32218900 | -1.57352000 |
| H | -1.00509700 | 12.92734900 | -3.23303700 |
| H | 0.18798900  | 11.68290900 | -2.85902600 |
| C | -3.24762400 | 10.16767500 | -6.41592400 |
| C | -4.56280400 | 10.02921100 | -7.16496900 |
| C | -4.90723300 | 8.55809500  | -7.41642600 |
| H | -5.81218200 | 8.48493100  | -8.03062900 |
| H | -5.07744600 | 8.01449800  | -6.48326800 |
| H | -4.09570200 | 8.05295200  | -7.95495200 |
| C | -4.52745900 | 10.78049400 | -8.49833700 |
| H | -5.36392700 | 10.44329800 | -6.54059600 |
| H | -4.20814700 | 11.82109200 | -8.38341800 |
| H | -5.51537600 | 10.77222700 | -8.97236100 |
| H | -3.83191600 | 10.29801600 | -9.19555600 |
| H | -2.12069500 | 9.38338200  | -8.06319600 |

**8. CAAC\_Full\_CH<sub>3</sub>\_Cl** (fully optimized)-triplet:

|   |             |            |             |
|---|-------------|------------|-------------|
| C | -5.79284600 | 3.92365600 | -1.64384100 |
| N | -7.67465100 | 3.83972000 | -0.26411800 |
| C | -5.75416800 | 2.65055700 | -0.77476800 |
| C | -7.15803100 | 2.44323800 | -0.21664000 |
| H | -5.06246400 | 2.82219400 | 0.06277200  |
| H | -5.39347200 | 1.77736200 | -1.33051800 |
| C | -6.96783400 | 4.69721900 | -1.04187400 |
| C | -6.60000800 | 6.98237100 | -2.51350500 |
| C | -5.58030200 | 7.84510900 | -2.32671100 |
| C | -7.34737200 | 6.92918600 | -3.82568500 |
| H | -7.50017000 | 5.89803400 | -4.17178100 |
| H | -6.84177200 | 7.49423100 | -4.62335900 |
| H | -8.35792000 | 7.35289800 | -3.71042100 |
| C | -4.83188400 | 7.90078000 | -1.01407800 |
| H | -4.61540900 | 8.93499700 | -0.70978500 |
| H | -3.84956800 | 7.41238500 | -1.11072000 |
| H | -5.36929100 | 7.39754200 | -0.19502900 |
| C | -6.05713500 | 3.62827100 | -3.12894900 |
| H | -5.87046000 | 4.52915800 | -3.72277600 |
| H | -7.08878200 | 3.30926200 | -3.31904400 |
| H | -5.37814900 | 2.84520500 | -3.49049800 |
| C | -4.44517200 | 4.63840300 | -1.52999500 |
| H | -3.64066100 | 3.92979200 | -1.76665300 |
| H | -4.28299700 | 5.00680400 | -0.50951900 |
| H | -4.36748200 | 5.47751100 | -2.22705200 |
| C | -7.15416700 | 1.87902600 | 1.20124300  |
| H | -6.45446200 | 2.40289700 | 1.85595200  |
| H | -6.85089200 | 0.82804100 | 1.16262300  |

|    |              |             |             |
|----|--------------|-------------|-------------|
| H  | -8.15583000  | 1.92007500  | 1.64598200  |
| C  | -8.01049200  | 1.50681300  | -1.07669500 |
| H  | -8.00915000  | 1.78288800  | -2.13342400 |
| H  | -9.04389600  | 1.49699700  | -0.71462600 |
| H  | -7.61691100  | 0.48831100  | -0.99404000 |
| C  | -6.46841100  | 10.89782800 | -3.03580300 |
| N  | -4.52789100  | 11.13537800 | -4.32034800 |
| C  | -6.48289600  | 12.25154500 | -3.77334600 |
| C  | -5.05876200  | 12.52555100 | -4.24231200 |
| H  | -6.87859400  | 13.06135400 | -3.14967300 |
| H  | -7.13362100  | 12.16168000 | -4.65515600 |
| C  | -6.30651900  | 11.04974300 | -1.51431500 |
| H  | -5.30244600  | 11.38091700 | -1.22394000 |
| H  | -6.50245900  | 10.09105600 | -1.02095200 |
| H  | -7.03443500  | 11.77524700 | -1.12883900 |
| C  | -7.79310300  | 10.17745200 | -3.29668600 |
| H  | -7.89949000  | 9.28879500  | -2.66960600 |
| H  | -7.88340600  | 9.88545700  | -4.35020500 |
| H  | -8.62413500  | 10.85443300 | -3.05891200 |
| C  | -4.24861800  | 13.36580100 | -3.25316600 |
| H  | -4.26447800  | 12.96354200 | -2.23785400 |
| H  | -4.65951400  | 14.38037300 | -3.22203200 |
| H  | -3.20904200  | 13.43603600 | -3.58951500 |
| C  | -5.00841200  | 13.24209900 | -5.58793700 |
| H  | -5.66589700  | 12.78403400 | -6.33018400 |
| H  | -3.98591100  | 13.26611000 | -5.98353000 |
| H  | -5.33374700  | 14.27790200 | -5.44784500 |
| B  | -4.93739100  | 8.72813000  | -3.45002900 |
| B  | -7.26656400  | 6.15415800  | -1.36086400 |
| Cl | -8.54888300  | 7.16370500  | -0.53138900 |
| C  | -5.25029300  | 10.20279200 | -3.64968200 |
| Cl | -3.66044000  | 7.80160400  | -4.37179000 |
| C  | -8.88380500  | 4.22190500  | 0.39345000  |
| C  | -10.09642400 | 4.21457400  | -0.31509400 |



|   |              |             |             |
|---|--------------|-------------|-------------|
| C | -8.80018300  | 4.70560000  | 1.70967300  |
| C | -11.24307400 | 4.64355600  | 0.35303700  |
| C | -9.97480200  | 5.12273300  | 2.33106500  |
| C | -11.18938000 | 5.08421000  | 1.66476600  |
| H | -12.19108800 | 4.65422100  | -0.18013000 |
| H | -12.09416400 | 5.42112000  | 2.16273300  |
| H | -9.92795500  | 5.51142900  | 3.34589300  |
| C | -7.48267600  | 4.88058500  | 2.44700000  |
| C | -7.49720600  | 4.15833300  | 3.79664600  |
| H | -7.79874000  | 3.11003600  | 3.70686800  |
| H | -8.19717300  | 4.64397600  | 4.48720500  |
| H | -6.50691600  | 4.19447400  | 4.26435500  |
| C | -7.16054300  | 6.36215000  | 2.66432100  |
| H | -6.67885000  | 4.46649200  | 1.82612100  |
| H | -6.25130600  | 6.46340000  | 3.26809800  |
| H | -7.97531900  | 6.86549100  | 3.19957600  |
| H | -7.00832300  | 6.88815000  | 1.71815300  |
| C | -10.21157500 | 3.85397300  | -1.78732400 |
| C | -11.22579800 | 2.72981200  | -2.01656400 |
| H | -11.21668900 | 2.41139300  | -3.06478800 |
| H | -12.24165300 | 3.07859700  | -1.79431300 |
| H | -11.03886400 | 1.85288800  | -1.38977100 |
| C | -10.61976300 | 5.06883600  | -2.62635300 |
| H | -9.22764200  | 3.53039500  | -2.14477300 |
| H | -10.73471600 | 4.77756800  | -3.67683100 |
| H | -9.88146500  | 5.87228600  | -2.57040600 |
| H | -11.58108200 | 5.47344400  | -2.28615700 |
| C | -3.26019500  | 10.85098000 | -4.91664300 |
| C | -2.10627500  | 10.78983800 | -4.11549100 |
| C | -1.98648400  | 10.24995400 | -6.86104700 |
| C | -0.82943100  | 10.23212500 | -6.09913500 |
| C | -0.89579300  | 10.48870700 | -4.73991000 |
| H | 0.12403100   | 9.99347800  | -6.56181500 |
| H | 0.00781300   | 10.43232600 | -4.13710200 |

|   |             |             |             |
|---|-------------|-------------|-------------|
| C | -2.11339900 | 10.93423600 | -2.60125800 |
| C | -1.67035500 | 9.62915800  | -1.93049700 |
| H | -2.27177400 | 8.77705400  | -2.25308700 |
| H | -1.74892500 | 9.71872200  | -0.84062200 |
| H | -0.62264400 | 9.40777300  | -2.16977200 |
| C | -1.19469200 | 12.06146300 | -2.12172200 |
| H | -3.14043300 | 11.13745300 | -2.27395400 |
| H | -1.26487100 | 12.17410800 | -1.03405500 |
| H | -1.42083700 | 13.02765700 | -2.57981300 |
| H | -0.14911800 | 11.82536600 | -2.35439400 |
| C | -3.22076900 | 10.54825400 | -6.28838900 |
| C | -4.46766300 | 10.44019800 | -7.15095400 |
| C | -4.71374700 | 8.99314800  | -7.58834500 |
| H | -5.57390600 | 8.94793500  | -8.26630500 |
| H | -4.90921100 | 8.33870000  | -6.73566700 |
| H | -3.84424900 | 8.59469300  | -8.12585300 |
| C | -4.37497200 | 11.33421600 | -8.39023700 |
| H | -5.33215400 | 10.74500100 | -6.54944000 |
| H | -4.12112300 | 12.36984300 | -8.14467500 |
| H | -5.32401600 | 11.33229100 | -8.93803000 |
| H | -3.60650700 | 10.96141600 | -9.07813100 |
| H | -1.94004500 | 10.00222500 | -7.91915900 |

9. CAAC\_Full\_CH<sub>3</sub>\_Cl (twisted)-singlet:

|   |             |            |             |
|---|-------------|------------|-------------|
| C | -5.94281900 | 3.92722000 | -1.85196500 |
| N | -7.75360700 | 3.86321400 | -0.38139900 |
| C | -5.86189500 | 2.65542500 | -0.98458900 |
| C | -7.21901500 | 2.47440500 | -0.31121900 |
| H | -5.09521200 | 2.80515200 | -0.21185900 |
| H | -5.57211100 | 1.77496700 | -1.57007100 |
| C | -7.09088400 | 4.70963300 | -1.20927600 |
| C | -6.60752200 | 7.11720100 | -2.47597500 |
| C | -5.56677200 | 7.88709800 | -2.09519600 |
| C | -7.25332000 | 7.29631400 | -3.82894100 |
| H | -7.32566600 | 6.35091000 | -4.38341800 |
| H | -6.71822200 | 8.02299800 | -4.46026100 |
| H | -8.28937800 | 7.65426800 | -3.71115000 |
| C | -4.92090100 | 7.70800200 | -0.74226700 |
| H | -4.84844600 | 8.65344000 | -0.18785900 |
| H | -3.88486200 | 7.34999400 | -0.86013200 |
| H | -5.45598200 | 6.98136500 | -0.11086100 |
| C | -6.31025800 | 3.61786500 | -3.31032300 |
| H | -6.28396400 | 4.53863600 | -3.90181700 |
| H | -7.31317200 | 3.18642500 | -3.40561700 |
| H | -5.58685800 | 2.91647500 | -3.74639900 |
| C | -4.57879100 | 4.61679800 | -1.82891400 |
| H | -3.81764600 | 3.90133800 | -2.16696600 |
| H | -4.31651300 | 4.92584400 | -0.81098800 |
| H | -4.53336600 | 5.48995200 | -2.48484600 |
| C | -7.09477400 | 1.99660600 | 1.13258400  |
| H | -6.38601900 | 2.59890300 | 1.70563500  |
| H | -6.73461800 | 0.96288600 | 1.13447800  |
| H | -8.06766200 | 2.01243200 | 1.63833400  |
| C | -8.12098100 | 1.47698600 | -1.04282600 |
| H | -8.17942300 | 1.66259200 | -2.11780200 |
| H | -9.13214200 | 1.49729300 | -0.62246300 |

|    |              |             |             |
|----|--------------|-------------|-------------|
| H  | -7.71958800  | 0.46822500  | -0.90001200 |
| C  | -6.23165800  | 11.07701900 | -2.71937600 |
| N  | -4.42090600  | 11.14102000 | -4.18995800 |
| C  | -6.31275200  | 12.34862000 | -3.58701700 |
| C  | -4.95559700  | 12.52979800 | -4.26027500 |
| H  | -6.60282300  | 13.22916300 | -3.00180200 |
| H  | -7.07929700  | 12.19849100 | -4.35981200 |
| C  | -5.86409900  | 11.38652000 | -1.26108000 |
| H  | -4.86102200  | 11.81761100 | -1.16587700 |
| H  | -5.89065300  | 10.46581600 | -0.66948400 |
| H  | -6.58726400  | 12.08818400 | -0.82505300 |
| C  | -7.59566400  | 10.38738000 | -2.74227100 |
| H  | -7.64102900  | 9.51423700  | -2.08631800 |
| H  | -7.85801100  | 10.07831700 | -3.76017100 |
| H  | -8.35680300  | 11.10283200 | -2.40418700 |
| C  | -4.05385500  | 13.52734500 | -3.52853900 |
| H  | -3.99641000  | 13.34239900 | -2.45339700 |
| H  | -4.45474000  | 14.53617500 | -3.67230900 |
| H  | -3.04235600  | 13.50641100 | -3.94802000 |
| C  | -5.07986300  | 13.00758500 | -5.70408700 |
| H  | -5.78794900  | 12.40469600 | -6.27735600 |
| H  | -4.10686000  | 12.99267800 | -6.20965600 |
| H  | -5.44096700  | 14.04097400 | -5.70595500 |
| B  | -4.77233600  | 8.83316800  | -3.06237800 |
| B  | -7.40203000  | 6.17109800  | -1.50888100 |
| Cl | -8.79419400  | 7.10322300  | -0.76461700 |
| C  | -5.08356700  | 10.29461100 | -3.36199800 |
| Cl | -3.38000200  | 7.90117400  | -3.80647600 |
| C  | -8.96961200  | 4.22542800  | 0.27773500  |
| C  | -10.18443300 | 4.15882000  | -0.42567800 |
| C  | -8.89867100  | 4.74870300  | 1.57932300  |
| C  | -11.34295300 | 4.56369900  | 0.23562300  |
| C  | -10.08699100 | 5.13347200  | 2.19674800  |
| C  | -11.30148000 | 5.03434700  | 1.53757600  |

|   |              |             |             |
|---|--------------|-------------|-------------|
| H | -12.29160400 | 4.53184000  | -0.29554600 |
| H | -12.21637100 | 5.34908500  | 2.03160800  |
| H | -10.05085200 | 5.54813600  | 3.20166500  |
| C | -7.58713700  | 5.01800000  | 2.29901800  |
| C | -7.53073800  | 4.31339600  | 3.65680200  |
| H | -7.73520200  | 3.24115400  | 3.58580900  |
| H | -8.27044000  | 4.74440200  | 4.34242300  |
| H | -6.54659000  | 4.44689900  | 4.11980200  |
| C | -7.37454800  | 6.52136200  | 2.50442000  |
| H | -6.76409100  | 4.65972700  | 1.66774300  |
| H | -6.43446500  | 6.69771500  | 3.03973500  |
| H | -8.18510300  | 6.95093300  | 3.10620800  |
| H | -7.34106900  | 7.06191900  | 1.55548900  |
| C | -10.29348100 | 3.75287400  | -1.88730500 |
| C | -11.30422600 | 2.61794600  | -2.07984500 |
| H | -11.27172300 | 2.24636500  | -3.10996800 |
| H | -12.32535100 | 2.97489900  | -1.89929900 |
| H | -11.12914100 | 1.77488600  | -1.40465600 |
| C | -10.69625500 | 4.93300000  | -2.77927000 |
| H | -9.31036400  | 3.41520000  | -2.22848700 |
| H | -10.90903900 | 4.57496000  | -3.79332300 |
| H | -9.90968300  | 5.68986900  | -2.84360600 |
| H | -11.60209800 | 5.42162800  | -2.39969200 |
| C | -3.20508700  | 10.77876300 | -4.84941600 |
| C | -1.99006900  | 10.84550300 | -4.14639100 |
| C | -2.08819100  | 9.87099600  | -6.76881000 |
| C | -0.87349200  | 9.97033300  | -6.11004200 |
| C | -0.83167600  | 10.44088500 | -4.80807200 |
| H | 0.04129700   | 9.65582600  | -6.60441200 |
| H | 0.11712000   | 10.47283000 | -4.27717100 |
| C | -1.88076500  | 11.25131800 | -2.68475600 |
| C | -1.47855400  | 10.07096300 | -1.79281900 |
| H | -2.26648200  | 9.31567600  | -1.72643200 |
| H | -1.26320300  | 10.42927200 | -0.77939700 |

|   |             |             |             |
|---|-------------|-------------|-------------|
| H | -0.57437200 | 9.58034000  | -2.17378900 |
| C | -0.86949600 | 12.38579100 | -2.49226100 |
| H | -2.86369500 | 11.58951500 | -2.34358200 |
| H | -0.90257000 | 12.75815400 | -1.46244400 |
| H | -1.04361700 | 13.22844600 | -3.16823000 |
| H | 0.15158100  | 12.02816200 | -2.67177700 |
| C | -3.27639300 | 10.25548700 | -6.15097800 |
| C | -4.58810000 | 9.98588300  | -6.87018500 |
| C | -4.80026600 | 8.48246900  | -7.07561600 |
| H | -5.74082900 | 8.30584100  | -7.61001200 |
| H | -4.83253000 | 7.94174700  | -6.12672400 |
| H | -3.99014800 | 8.05335400  | -7.67831300 |
| C | -4.64538700 | 10.69054200 | -8.22788000 |
| H | -5.41104900 | 10.34376900 | -6.23854200 |
| H | -4.44198700 | 11.76297900 | -8.15678700 |
| H | -5.62951100 | 10.55609100 | -8.69067700 |
| H | -3.90540700 | 10.26032200 | -8.91368700 |
| H | -2.12455800 | 9.45641300  | -7.77374700 |

**10. CAAC\_Full\_CH<sub>3</sub>\_Cl** (twisted)-triplet:

|   |             |            |             |
|---|-------------|------------|-------------|
| C | -5.94497500 | 3.92570600 | -1.85303600 |
| N | -7.75366000 | 3.86141000 | -0.37953600 |

|   |             |             |             |
|---|-------------|-------------|-------------|
| C | -5.86271200 | 2.65391600  | -0.98566400 |
| C | -7.21882600 | 2.47283400  | -0.31012100 |
| H | -5.09480500 | 2.80368400  | -0.21415900 |
| H | -5.57381500 | 1.77340500  | -1.57153500 |
| C | -7.09181800 | 4.70829800  | -1.20869000 |
| C | -6.60831300 | 7.11807000  | -2.47429300 |
| C | -5.56596000 | 7.88623100  | -2.09681400 |
| C | -7.26256900 | 7.29719400  | -3.82451700 |
| H | -7.34686700 | 6.34870800  | -4.37195300 |
| H | -6.72943000 | 8.01490700  | -4.46587900 |
| H | -8.29506400 | 7.66278300  | -3.69988800 |
| C | -4.91164500 | 7.70712700  | -0.74661900 |
| H | -4.82727900 | 8.65564000  | -0.19924000 |
| H | -3.87915500 | 7.34151800  | -0.87131100 |
| H | -5.44475500 | 6.98943300  | -0.10519300 |
| C | -6.31452700 | 3.61663700  | -3.31082900 |
| H | -6.29161200 | 4.53803000  | -3.90165800 |
| H | -7.31659200 | 3.18286400  | -3.40451100 |
| H | -5.59040200 | 2.91743400  | -3.74926700 |
| C | -4.58097800 | 4.61536400  | -1.83188900 |
| H | -3.81985100 | 3.89967500  | -2.16949000 |
| H | -4.31803600 | 4.92568100  | -0.81452700 |
| H | -4.53613500 | 5.48767000  | -2.48903500 |
| C | -7.09252800 | 1.99537800  | 1.13370200  |
| H | -6.38318200 | 2.59792900  | 1.70578300  |
| H | -6.73233400 | 0.96167400  | 1.13558600  |
| H | -8.06483600 | 2.01132200  | 1.64059500  |
| C | -8.12143700 | 1.47461500  | -1.04007000 |
| H | -8.18007700 | 1.65858900  | -2.11531600 |
| H | -9.13253700 | 1.49574500  | -0.61950600 |
| H | -7.72026900 | 0.46594300  | -0.89598300 |
| C | -6.22946900 | 11.07855100 | -2.71825300 |
| N | -4.42084100 | 11.14281200 | -4.19179300 |
| C | -6.31192800 | 12.35011300 | -3.58593700 |

|    |              |             |             |
|----|--------------|-------------|-------------|
| C  | -4.95578500  | 12.53135400 | -4.26138500 |
| H  | -6.60112700  | 13.23072800 | -3.00036800 |
| H  | -7.07969800  | 12.19989400 | -4.35749600 |
| C  | -5.85974100  | 11.38780900 | -1.26054700 |
| H  | -4.85749500  | 11.82120400 | -1.16700200 |
| H  | -5.88291700  | 10.46649900 | -0.66958800 |
| H  | -6.58359800  | 12.08731800 | -0.82215300 |
| C  | -7.59344600  | 10.38883300 | -2.73917200 |
| H  | -7.63820200  | 9.51655200  | -2.08198500 |
| H  | -7.85650000  | 10.07848100 | -3.75649000 |
| H  | -8.35455200  | 11.10452300 | -2.40152100 |
| C  | -4.05340700  | 13.52973300 | -3.53133600 |
| H  | -3.99583500  | 13.34650500 | -2.45590700 |
| H  | -4.45402700  | 14.53847300 | -3.67648400 |
| H  | -3.04194400  | 13.50791400 | -3.95095400 |
| C  | -5.08214100  | 13.00876100 | -5.70522500 |
| H  | -5.79074700  | 12.40553500 | -6.27752800 |
| H  | -4.10971200  | 12.99383500 | -6.21193100 |
| H  | -5.44339300  | 14.04209500 | -5.70709700 |
| B  | -4.77290700  | 8.83407000  | -3.06586300 |
| B  | -7.40144600  | 6.17019600  | -1.50534500 |
| Cl | -8.79575200  | 7.10097800  | -0.76462900 |
| C  | -5.08262200  | 10.29594600 | -3.36254300 |
| Cl | -3.37839400  | 7.90343700  | -3.80637100 |
| C  | -8.96990800  | 4.22356000  | 0.27880500  |
| C  | -10.18408900 | 4.15769100  | -0.42580700 |
| C  | -8.89995700  | 4.74731100  | 1.58024200  |
| C  | -11.34294000 | 4.56405500  | 0.23394800  |
| C  | -10.08857900 | 5.13342300  | 2.19627500  |
| C  | -11.30241300 | 5.03530400  | 1.53574500  |
| H  | -12.29104100 | 4.53291400  | -0.29825400 |
| H  | -12.21753500 | 5.35122800  | 2.02859600  |
| H  | -10.05316600 | 5.54846700  | 3.20107000  |
| C  | -7.58880300  | 5.01592200  | 2.30078100  |



|   |              |             |             |
|---|--------------|-------------|-------------|
| C | -7.53402900  | 4.31239500  | 3.65911500  |
| H | -7.73834300  | 3.24008500  | 3.58841500  |
| H | -8.27452100  | 4.74374700  | 4.34366500  |
| H | -6.55039500  | 4.44612800  | 4.12314200  |
| C | -7.37462500  | 6.51925800  | 2.50441800  |
| H | -6.76582200  | 4.65606400  | 1.67048100  |
| H | -6.43544100  | 6.69529200  | 3.04141800  |
| H | -8.18591300  | 6.95105600  | 3.10361000  |
| H | -7.33838800  | 7.05819700  | 1.55461900  |
| C | -10.29166000 | 3.75045400  | -1.88715800 |
| C | -11.30455600 | 2.61750300  | -2.07981800 |
| H | -11.27089600 | 2.24415900  | -3.10926800 |
| H | -12.32530900 | 2.97672000  | -1.90170600 |
| H | -11.13224900 | 1.77522800  | -1.40288800 |
| C | -10.68949500 | 4.93038300  | -2.78158800 |
| H | -9.30886300  | 3.40988200  | -2.22604500 |
| H | -10.90526800 | 4.57099900  | -3.79453700 |
| H | -9.89891900  | 5.68293200  | -2.84884900 |
| H | -11.59214600 | 5.42501400  | -2.40215700 |
| C | -3.20480100  | 10.78061300 | -4.85049400 |
| C | -1.99039700  | 10.84664700 | -4.14632000 |
| C | -2.08665500  | 9.87106300  | -6.76838700 |
| C | -0.87258600  | 9.96943500  | -6.10831100 |
| C | -0.83168300  | 10.44058500 | -4.80649700 |
| H | 0.04242500   | 9.65377700  | -6.60153900 |
| H | 0.11658100   | 10.47184100 | -4.27459600 |
| C | -1.88254300  | 11.25375800 | -2.68496500 |
| C | -1.48533000  | 10.07358900 | -1.79055800 |
| H | -2.27738300  | 9.32279200  | -1.72105100 |
| H | -1.26675400  | 10.43326000 | -0.77830300 |
| H | -0.58450900  | 9.57677600  | -2.17149000 |
| C | -0.86908100  | 12.38621800 | -2.49236100 |
| H | -2.86513200  | 11.59490500 | -2.34608800 |
| H | -0.90335700  | 12.76041100 | -1.46324700 |

|   |             |             |             |
|---|-------------|-------------|-------------|
| H | -1.04035700 | 13.22804800 | -3.17013500 |
| H | 0.15161800  | 12.02627800 | -2.66936100 |
| C | -3.27515200 | 10.25685500 | -6.15190200 |
| C | -4.58649100 | 9.98790300  | -6.87191300 |
| C | -4.80017700 | 8.48451100  | -7.07561500 |
| H | -5.73993900 | 8.30816300  | -7.61151400 |
| H | -4.83495600 | 7.94534700  | -6.12587400 |
| H | -3.98941300 | 8.05326700  | -7.67591200 |
| C | -4.64223700 | 10.69151400 | -8.23014000 |
| H | -5.40937200 | 10.34731400 | -6.24120200 |
| H | -4.43901600 | 11.76402400 | -8.15932000 |
| H | -5.62586400 | 10.55681300 | -8.69392300 |
| H | -3.90148300 | 10.26098600 | -8.91491800 |
| H | -2.12232000 | 9.45611100  | -7.77320500 |

**11. CAAC\_Full\_CH<sub>3</sub>\_Cl** (planar)-singlet:

|   |             |            |             |
|---|-------------|------------|-------------|
| C | -6.72440800 | 3.67824800 | -2.04388200 |
| N | -8.12023700 | 4.02880100 | -0.18327500 |
| C | -6.54957600 | 2.57160400 | -0.98494300 |
| C | -7.83083700 | 2.55940300 | -0.18117100 |
| H | -5.72781200 | 2.85051300 | -0.30957900 |
| H | -6.30985900 | 1.59871800 | -1.42671900 |

|   |             |             |             |
|---|-------------|-------------|-------------|
| C | -7.66153800 | 4.67565100  | -1.30467000 |
| C | -7.04198200 | 6.93452700  | -2.73580300 |
| C | -6.93999900 | 8.31425000  | -2.91056500 |
| C | -7.44547800 | 6.14830400  | -4.00009500 |
| H | -6.62190200 | 5.65276500  | -4.52310300 |
| H | -7.90587600 | 6.81894900  | -4.72935600 |
| H | -8.19981100 | 5.39251000  | -3.76329200 |
| C | -6.53647100 | 9.10045600  | -1.64626900 |
| H | -7.36001100 | 9.59609000  | -1.12329800 |
| H | -5.78205600 | 9.85617200  | -1.88306700 |
| H | -6.07615200 | 8.42978600  | -0.91698200 |
| C | -7.30776200 | 3.07108800  | -3.35342700 |
| H | -6.83116900 | 3.50566200  | -4.23509200 |
| H | -8.38460400 | 3.22747200  | -3.46660200 |
| H | -7.12895100 | 1.99037100  | -3.38131500 |
| C | -5.32971700 | 4.25352300  | -2.32650000 |
| H | -4.67488700 | 3.44070500  | -2.66922300 |
| H | -4.89787400 | 4.67386200  | -1.41145200 |
| H | -5.32238600 | 5.03198400  | -3.08925700 |
| C | -7.63188100 | 1.99290700  | 1.21428400  |
| H | -6.79896700 | 2.46134300  | 1.74277300  |
| H | -7.41153000 | 0.92447400  | 1.12074900  |
| H | -8.54390800 | 2.08982900  | 1.81251800  |
| C | -8.96589300 | 1.76026800  | -0.83001600 |
| H | -9.15657200 | 2.03641600  | -1.86748300 |
| H | -9.89062300 | 1.89624100  | -0.25739500 |
| H | -8.71213900 | 0.69508800  | -0.80575300 |
| C | -7.25761300 | 11.57052400 | -3.60239200 |
| N | -5.86177700 | 11.22004600 | -5.46301200 |
| C | -7.43245600 | 12.67719600 | -4.66129800 |
| C | -6.15118000 | 12.68944300 | -5.46504800 |
| H | -7.67220000 | 13.65006300 | -4.21949700 |
| H | -8.25420100 | 12.39829000 | -5.33668700 |
| C | -6.67427500 | 12.17766500 | -2.29282700 |

|    |              |             |             |
|----|--------------|-------------|-------------|
| H  | -5.59746100  | 12.02115300 | -2.17956900 |
| H  | -7.15098900  | 11.74318300 | -1.41118000 |
| H  | -6.85295200  | 13.25840400 | -2.26498800 |
| C  | -8.65229700  | 10.99521500 | -3.31980100 |
| H  | -8.65962500  | 10.21673800 | -2.55705900 |
| H  | -9.08412100  | 10.57488500 | -4.23486300 |
| H  | -9.30714600  | 11.80801400 | -2.97707200 |
| C  | -5.01613100  | 13.48853800 | -4.81614100 |
| H  | -4.82543400  | 13.21229400 | -3.77870200 |
| H  | -5.26989800  | 14.55371700 | -4.84030300 |
| H  | -4.09140500  | 13.35262800 | -5.38878500 |
| C  | -6.35011400  | 13.25601900 | -6.86047300 |
| H  | -7.18302700  | 12.78762300 | -7.38899800 |
| H  | -5.43808100  | 13.15912100 | -7.45870200 |
| H  | -6.57045300  | 14.32445000 | -6.76688000 |
| B  | -6.41952800  | 9.03846300  | -4.18359300 |
| B  | -7.56246200  | 6.21033900  | -1.46275900 |
| Cl | -8.33658800  | 7.21427600  | -0.15295500 |
| C  | -6.32046700  | 10.57315800 | -4.34163500 |
| Cl | -5.64547100  | 8.03458600  | -5.49347700 |
| C  | -9.25617200  | 4.48609300  | 0.57168400  |
| C  | -10.49835500 | 4.64615600  | -0.07562600 |
| C  | -9.10539300  | 4.79613700  | 1.93791800  |
| C  | -11.58620100 | 5.07280800  | 0.68603400  |
| C  | -10.23245500 | 5.19537300  | 2.65270000  |
| C  | -11.46713400 | 5.32931500  | 2.04058200  |
| H  | -12.54591400 | 5.21498600  | 0.19489500  |
| H  | -12.33029600 | 5.65552300  | 2.61357700  |
| H  | -10.12538900 | 5.44126500  | 3.70666700  |
| C  | -7.76433000  | 4.84610000  | 2.65642000  |
| C  | -7.73687000  | 3.95379300  | 3.90351800  |
| H  | -8.05399300  | 2.92574000  | 3.71738600  |
| H  | -8.39970600  | 4.36581700  | 4.67430800  |
| H  | -6.72854100  | 3.92956200  | 4.33224000  |

|   |              |             |             |
|---|--------------|-------------|-------------|
| C | -7.42735500  | 6.27320500  | 3.10863100  |
| H | -6.98638400  | 4.53012200  | 1.95034100  |
| H | -6.46529800  | 6.27589300  | 3.63406700  |
| H | -8.18375400  | 6.64189600  | 3.81206600  |
| H | -7.36898100  | 6.97287900  | 2.27544500  |
| C | -10.73120500 | 4.44702100  | -1.56713300 |
| C | -11.88765400 | 3.48313800  | -1.84501700 |
| H | -11.96360500 | 3.28307000  | -2.91969800 |
| H | -12.84616100 | 3.91214900  | -1.53091100 |
| H | -11.76803500 | 2.52658200  | -1.32700000 |
| C | -11.00253400 | 5.78407100  | -2.26480500 |
| H | -9.82678400  | 4.02823200  | -2.01821800 |
| H | -11.19114600 | 5.62077000  | -3.33252000 |
| H | -10.16402900 | 6.48049700  | -2.16729300 |
| H | -11.89059800 | 6.26808500  | -1.83918900 |
| C | -4.72583100  | 10.76279600 | -6.21797800 |
| C | -3.48365600  | 10.60269500 | -5.57066100 |
| C | -3.74951700  | 10.05364500 | -8.29902500 |
| C | -2.51484500  | 9.91967100  | -7.68689900 |
| C | -2.39579800  | 10.17609400 | -6.33233400 |
| H | -1.65167400  | 9.59350100  | -8.25990200 |
| H | -1.43609100  | 10.03388900 | -5.84119000 |
| C | -3.25081900  | 10.80173600 | -4.07913900 |
| C | -2.97947100  | 9.46464300  | -3.38155700 |
| H | -3.81795800  | 8.76820300  | -3.47913400 |
| H | -2.79088300  | 9.62787100  | -2.31382700 |
| H | -2.09138800  | 8.98068000  | -3.80719100 |
| C | -2.09438900  | 11.76562100 | -3.80118300 |
| H | -4.15525000  | 11.22048000 | -3.62802800 |
| H | -2.01844000  | 11.96560800 | -2.72648700 |
| H | -2.21402900  | 12.72221300 | -4.31912600 |
| H | -1.13587400  | 11.33665300 | -4.11532400 |
| C | -4.87658900  | 10.45283400 | -7.58423300 |
| C | -6.21764200  | 10.40291000 | -8.30275700 |

|   |             |             |              |
|---|-------------|-------------|--------------|
| C | -6.55460800 | 8.97582900  | -8.75505000  |
| H | -7.51665900 | 8.97316600  | -9.28049700  |
| H | -6.61299100 | 8.27611000  | -7.92190200  |
| H | -5.79820000 | 8.60717800  | -9.45849500  |
| C | -6.24508800 | 11.29528400 | -9.54980700  |
| H | -6.99559800 | 10.71884800 | -7.59667100  |
| H | -5.92796600 | 12.32332600 | -9.36361700  |
| H | -7.25341200 | 11.31953900 | -9.97853900  |
| H | -5.58224500 | 10.88330000 | -10.32061200 |
| H | -3.85656800 | 9.80781700  | -9.35300900  |

**12. CAAC\_Full\_CH<sub>3</sub>\_Cl** (planar)-triplet:

|   |             |            |             |
|---|-------------|------------|-------------|
| C | -6.73559400 | 3.68817200 | -2.05252300 |
| N | -8.14231900 | 4.01691100 | -0.19478500 |
| C | -6.55313200 | 2.57994200 | -0.99613500 |
| C | -7.83746600 | 2.55300200 | -0.19490900 |
| H | -5.73608400 | 2.86540400 | -0.31765100 |
| H | -6.30252700 | 1.61057800 | -1.43998600 |
| C | -7.68104500 | 4.67419800 | -1.31346700 |
| C | -7.04379800 | 6.94189500 | -2.74587300 |
| C | -6.93835500 | 8.30722200 | -2.90053900 |
| C | -7.49053600 | 6.17581500 | -4.00553700 |

|   |             |             |             |
|---|-------------|-------------|-------------|
| H | -6.69287800 | 5.62289100  | -4.51029400 |
| H | -7.90630900 | 6.86257900  | -4.74694800 |
| H | -8.28513300 | 5.46045100  | -3.76194900 |
| C | -6.49152300 | 9.07330800  | -1.64088500 |
| H | -7.28902100 | 9.62650000  | -1.13618600 |
| H | -5.69672900 | 9.78848300  | -1.88446500 |
| H | -6.07593600 | 8.38650200  | -0.89941200 |
| C | -7.31962600 | 3.08342100  | -3.36283100 |
| H | -6.83647200 | 3.50992700  | -4.24482000 |
| H | -8.39439500 | 3.25313500  | -3.47773000 |
| H | -7.15311800 | 2.00067800  | -3.39046600 |
| C | -5.34626100 | 4.27673600  | -2.33372500 |
| H | -4.68321500 | 3.47308300  | -2.68161900 |
| H | -4.91743000 | 4.69600000  | -1.41641500 |
| H | -5.34380700 | 5.05975200  | -3.09285800 |
| C | -7.63673000 | 1.99025200  | 1.20253700  |
| H | -6.80472700 | 2.46247500  | 1.72919900  |
| H | -7.41489700 | 0.92175300  | 1.11423200  |
| H | -8.54865400 | 2.08901100  | 1.80111600  |
| C | -8.96059500 | 1.73930000  | -0.84685000 |
| H | -9.14834600 | 2.00950800  | -1.88648800 |
| H | -9.88955000 | 1.86859600  | -0.27941500 |
| H | -8.69690700 | 0.67661800  | -0.81706800 |
| C | -7.24641700 | 11.56092900 | -3.59372400 |
| N | -5.83982500 | 11.23203900 | -5.45167000 |
| C | -7.42912400 | 12.66896900 | -4.65037400 |
| C | -6.14480500 | 12.69591700 | -5.45164400 |
| H | -7.67973900 | 13.63848400 | -4.20686000 |
| H | -8.24612600 | 12.38322000 | -5.32877100 |
| C | -6.66207400 | 12.16573800 | -2.28357900 |
| H | -5.58752500 | 11.99506300 | -2.16826800 |
| H | -7.14599100 | 11.74007700 | -1.40156800 |
| H | -6.82752800 | 13.24865700 | -2.25645400 |
| C | -8.63566800 | 10.97227100 | -3.31215600 |

|    |              |             |             |
|----|--------------|-------------|-------------|
| H  | -8.63785700  | 10.18918300 | -2.55310400 |
| H  | -9.06476900  | 10.55306400 | -4.22936400 |
| H  | -9.29866600  | 11.77582800 | -2.96396300 |
| C  | -5.02175500  | 13.50973500 | -4.79971100 |
| H  | -4.83406600  | 13.23964800 | -3.76003000 |
| H  | -5.28547800  | 14.57240700 | -4.82964300 |
| H  | -4.09274200  | 13.38039600 | -5.36705100 |
| C  | -6.34548600  | 13.25850200 | -6.84915100 |
| H  | -7.17725400  | 12.78598000 | -7.37593100 |
| H  | -5.43340900  | 13.15986100 | -7.44751300 |
| H  | -6.56756200  | 14.32696600 | -6.76106200 |
| B  | -6.40869900  | 9.04453200  | -4.18652900 |
| B  | -7.57346500  | 6.20455600  | -1.45986300 |
| Cl | -8.41344200  | 7.22812500  | -0.21090500 |
| C  | -6.30110900  | 10.57485100 | -4.33294600 |
| Cl | -5.56933200  | 8.02112700  | -5.43600300 |
| C  | -9.27431200  | 4.47453500  | 0.56208700  |
| C  | -10.52191500 | 4.62674900  | -0.07625800 |
| C  | -9.11087400  | 4.80690700  | 1.92141100  |
| C  | -11.60205200 | 5.06849800  | 0.68738600  |
| C  | -10.23021600 | 5.22124300  | 2.64001600  |
| C  | -11.46982200 | 5.34801100  | 2.03646000  |
| H  | -12.56616800 | 5.20406700  | 0.20289000  |
| H  | -12.32713600 | 5.68592300  | 2.61150700  |
| H  | -10.11324900 | 5.48411800  | 3.68886700  |
| C  | -7.76256800  | 4.86162100  | 2.62496600  |
| C  | -7.72699700  | 3.98564900  | 3.88286500  |
| H  | -8.04594900  | 2.95572200  | 3.70923500  |
| H  | -8.38509000  | 4.40647800  | 4.65297600  |
| H  | -6.71590500  | 3.96535900  | 4.30526400  |
| C  | -7.41480300  | 6.29424700  | 3.04968200  |
| H  | -6.99358700  | 4.53089200  | 1.91599600  |
| H  | -6.44596100  | 6.30319700  | 3.56241700  |
| H  | -8.16115100  | 6.67810300  | 3.75581900  |



|   |              |             |             |
|---|--------------|-------------|-------------|
| H | -7.36557000  | 6.97961900  | 2.20366100  |
| C | -10.76482300 | 4.40228100  | -1.56225600 |
| C | -11.92217400 | 3.43259200  | -1.81476900 |
| H | -12.00616300 | 3.21331100  | -2.88510200 |
| H | -12.87865200 | 3.86630100  | -1.50071500 |
| H | -11.79782100 | 2.48551600  | -1.28072000 |
| C | -11.04352100 | 5.72632200  | -2.28145700 |
| H | -9.86209200  | 3.97785800  | -2.01077500 |
| H | -11.24412400 | 5.54358700  | -3.34387800 |
| H | -10.20373500 | 6.42389600  | -2.20625200 |
| H | -11.92614600 | 6.21973600  | -1.85531900 |
| C | -4.70767100  | 10.77428500 | -6.20827600 |
| C | -3.46016400  | 10.62201300 | -5.56973000 |
| C | -3.75143500  | 10.02738000 | -8.28601200 |
| C | -2.51192500  | 9.90063300  | -7.68226300 |
| C | -2.37992100  | 10.18018200 | -6.33318300 |
| H | -1.65452800  | 9.56268200  | -8.25716100 |
| H | -1.41588900  | 10.04459900 | -5.84852600 |
| C | -3.21741800  | 10.84654700 | -4.08373000 |
| C | -2.93910200  | 9.52247500  | -3.36444400 |
| H | -3.77886800  | 8.82490900  | -3.44010500 |
| H | -2.73902400  | 9.70514800  | -2.30191100 |
| H | -2.05627000  | 9.02908100  | -3.79017700 |
| C | -2.05994000  | 11.81604700 | -3.83109300 |
| H | -4.12013500  | 11.27116900 | -3.63540400 |
| H | -1.97612400  | 12.03544000 | -2.76076900 |
| H | -2.18403700  | 12.76307900 | -4.36528100 |
| H | -1.10347400  | 11.38214200 | -4.14491000 |
| C | -4.87088900  | 10.44175700 | -7.56761100 |
| C | -6.21905600  | 10.38699300 | -8.27144100 |
| C | -6.56665300  | 8.95440900  | -8.69648600 |
| H | -7.53532800  | 8.94554200  | -9.20954000 |
| H | -6.61620800  | 8.26890000  | -7.85059700 |
| H | -5.82008800  | 8.57065500  | -9.40244400 |

|   |             |             |              |
|---|-------------|-------------|--------------|
| C | -6.25446500 | 11.26308800 | -9.52927200  |
| H | -6.98819900 | 10.71755700 | -7.56256500  |
| H | -5.93559400 | 12.29301500 | -9.35554400  |
| H | -7.26549000 | 11.28335300 | -9.95183500  |
| H | -5.59622700 | 10.84232700 | -10.29930000 |
| H | -3.86824100 | 9.76445700  | -9.33487100  |

**13. CAAC\_Full\_H\_CI (fully optimized)-singlet:**

|   |             |            |             |
|---|-------------|------------|-------------|
| C | -5.66662400 | 4.07027700 | -1.62632100 |
| N | -7.52692600 | 4.05490700 | -0.21701200 |
| C | -5.69574800 | 2.75923700 | -0.81491800 |
| C | -7.10012100 | 2.62077600 | -0.24026000 |
| H | -4.97910600 | 2.83553300 | 0.01471100  |
| H | -5.40999700 | 1.89240000 | -1.42140200 |
| C | -6.79632900 | 4.88258800 | -0.98303400 |
| C | -6.42435800 | 7.07395500 | -2.40288600 |
| C | -6.71447800 | 8.36861500 | -2.84358300 |
| C | -5.94521700 | 3.78852100 | -3.11456900 |
| H | -5.86405200 | 4.68965600 | -3.72467500 |
| H | -6.94372900 | 3.37298000 | -3.27785900 |
| H | -5.21291200 | 3.05892500 | -3.48392100 |
| C | -4.28524300 | 4.71505900 | -1.47569800 |

|   |             |             |             |
|---|-------------|-------------|-------------|
| H | -3.51724200 | 3.98683700  | -1.76744300 |
| H | -4.10278700 | 5.00054100  | -0.43384300 |
| H | -4.16198400 | 5.60374500  | -2.09652500 |
| C | -7.09539700 | 1.98951700  | 1.14602500  |
| H | -6.38915800 | 2.47281900  | 1.82471600  |
| H | -6.79957400 | 0.94011300  | 1.04619900  |
| H | -8.09661900 | 2.01087500  | 1.59029400  |
| C | -8.05089100 | 1.78506300  | -1.10092000 |
| H | -8.10470500 | 2.11500800  | -2.13938200 |
| H | -9.05913000 | 1.81298500  | -0.67298100 |
| H | -7.71355300 | 0.74351700  | -1.09354100 |
| C | -7.47246800 | 11.37217800 | -3.62021700 |
| N | -5.61216600 | 11.38771600 | -5.02952700 |
| C | -7.44350100 | 12.68321100 | -4.43164500 |
| C | -6.03917000 | 12.82178600 | -5.00638800 |
| H | -7.72927000 | 13.55002700 | -3.82513900 |
| H | -8.16020200 | 12.60686900 | -5.26121700 |
| C | -7.19389300 | 11.65402100 | -2.13198300 |
| H | -6.19546200 | 12.06977700 | -1.96873600 |
| H | -7.27485500 | 10.75288800 | -1.52184900 |
| H | -7.92633900 | 12.38347700 | -1.76263300 |
| C | -8.85378000 | 10.72723400 | -3.77081400 |
| H | -8.97695800 | 9.83857200  | -3.14993200 |
| H | -9.03618900 | 10.44166200 | -4.81265300 |
| H | -9.62186400 | 11.45539400 | -3.47913100 |
| C | -5.08847900 | 13.65770100 | -4.14583600 |
| H | -5.03473000 | 13.32793300 | -3.10731400 |
| H | -5.42586600 | 14.69922900 | -4.15340800 |
| H | -4.08020600 | 13.62974800 | -4.57370200 |
| C | -6.04403400 | 13.45289400 | -6.39274200 |
| H | -6.75029100 | 12.96947900 | -7.07133400 |
| H | -5.04283900 | 13.43154200 | -6.83706700 |
| H | -6.33991000 | 14.50229300 | -6.29301600 |
| B | -6.10226800 | 9.06115200  | -4.01072000 |

|    |              |             |             |
|----|--------------|-------------|-------------|
| B  | -7.03659000  | 6.38144300  | -1.23574500 |
| Cl | -8.16561200  | 7.36582800  | -0.17265100 |
| C  | -6.34267400  | 10.55997600 | -4.26348500 |
| Cl | -4.97314600  | 8.07684100  | -5.07375900 |
| C  | -8.78915800  | 4.41499700  | 0.36802700  |
| C  | -9.92015600  | 4.52791900  | -0.46153300 |
| C  | -8.85324000  | 4.70160600  | 1.74312400  |
| C  | -11.13423200 | 4.86357900  | 0.13717000  |
| C  | -10.09401700 | 5.02638000  | 2.28729200  |
| C  | -11.22979500 | 5.09583700  | 1.49819700  |
| H  | -12.01783900 | 4.96225700  | -0.48883300 |
| H  | -12.18667000 | 5.35755300  | 1.94073700  |
| H  | -10.15902100 | 5.25938100  | 3.34751900  |
| C  | -7.63254700  | 4.79415300  | 2.64530500  |
| C  | -7.75024800  | 3.88313000  | 3.87160300  |
| H  | -7.98173300  | 2.84505300  | 3.62004000  |
| H  | -8.54339400  | 4.24383800  | 4.53763400  |
| H  | -6.81866400  | 3.89723200  | 4.44848000  |
| C  | -7.41743800  | 6.23178900  | 3.13268200  |
| H  | -6.74874400  | 4.51140100  | 2.06126500  |
| H  | -6.54454700  | 6.27256700  | 3.79442000  |
| H  | -8.28433000  | 6.57569200  | 3.71012700  |
| H  | -7.26435000  | 6.92832000  | 2.30748200  |
| C  | -9.89629900  | 4.38372300  | -1.97658600 |
| C  | -10.87449500 | 3.30941800  | -2.46257000 |
| H  | -10.77933900 | 3.17195300  | -3.54543900 |
| H  | -11.90989700 | 3.61314900  | -2.26741100 |
| H  | -10.72020400 | 2.34022400  | -1.98022800 |
| C  | -10.24310000 | 5.71043400  | -2.66306000 |
| H  | -8.88403100  | 4.10985200  | -2.29329000 |
| H  | -10.24215700 | 5.57648400  | -3.75057000 |
| H  | -9.53488000  | 6.50508000  | -2.41678700 |
| H  | -11.24641100 | 6.04414900  | -2.37067900 |
| C  | -4.34986900  | 11.02778200 | -5.61452500 |

|   |             |             |             |
|---|-------------|-------------|-------------|
| C | -3.21888500 | 10.91506000 | -4.78492400 |
| C | -3.04487500 | 10.41642900 | -7.53370700 |
| C | -1.90911500 | 10.34715600 | -6.74457100 |
| C | -2.00474800 | 10.57950800 | -5.38356400 |
| H | -0.95219600 | 10.08551200 | -7.18706000 |
| H | -1.12114900 | 10.48098500 | -4.75752700 |
| C | -3.24282000 | 11.05936100 | -3.26988300 |
| C | -2.89589300 | 9.73274300  | -2.58329600 |
| H | -3.60395200 | 8.93797500  | -2.82962600 |
| H | -2.89700700 | 9.86674600  | -1.49579300 |
| H | -1.89248700 | 9.39917600  | -2.87552200 |
| C | -2.26479500 | 12.13383500 | -2.78393900 |
| H | -4.25513900 | 11.33312700 | -2.95324700 |
| H | -2.35993000 | 12.27127600 | -1.70106500 |
| H | -2.41929800 | 13.10300300 | -3.26626800 |
| H | -1.22934700 | 11.83029700 | -2.97914700 |
| C | -4.28571100 | 10.74109800 | -6.98960400 |
| C | -5.50634400 | 10.64840100 | -7.89185700 |
| C | -5.72121500 | 9.21074000  | -8.37926000 |
| H | -6.59408400 | 9.16982300  | -9.04101800 |
| H | -5.87421000 | 8.51418500  | -7.55406600 |
| H | -4.85425400 | 8.86697600  | -8.95668300 |
| C | -5.38867100 | 11.55944900 | -9.11814200 |
| H | -6.39021700 | 10.93102500 | -7.30786500 |
| H | -5.15728200 | 12.59754500 | -8.86657300 |
| H | -6.32023100 | 11.54527900 | -9.69505600 |
| H | -4.59547100 | 11.19880600 | -9.78414400 |
| H | -2.97981200 | 10.18336400 | -8.59391600 |
| H | -5.71580600 | 6.53941300  | -3.03342800 |
| H | -7.42303600 | 8.90314400  | -2.21303900 |

**14. CAAC\_Full\_H\_CI (fully optimized)-triplet:**

|   |             |            |             |
|---|-------------|------------|-------------|
| C | -5.76776300 | 4.00280900 | -1.70307600 |
| N | -7.58094900 | 3.98782800 | -0.21884700 |
| C | -5.75245200 | 2.70701900 | -0.86795600 |
| C | -7.13391800 | 2.56379000 | -0.23610500 |
| H | -5.00519300 | 2.80510500 | -0.06828600 |
| H | -5.48180300 | 1.83105600 | -1.46897500 |
| C | -6.88169700 | 4.81374200 | -1.03963400 |
| C | -6.49035600 | 7.05970100 | -2.48344300 |
| C | -6.64844600 | 8.38304800 | -2.76281600 |
| C | -6.09117800 | 3.69658500 | -3.17552800 |
| H | -6.11600100 | 4.60247800 | -3.78516500 |
| H | -7.05781600 | 3.19795400 | -3.29049100 |
| H | -5.32008500 | 3.03332100 | -3.58892300 |
| C | -4.39268600 | 4.67212700 | -1.61132500 |
| H | -3.62021900 | 3.95963800 | -1.92871500 |
| H | -4.17669800 | 4.96870100 | -0.57882900 |
| H | -4.30762000 | 5.55835900 | -2.24386100 |
| C | -7.06486700 | 1.96110700 | 1.16160800  |

|    |             |             |             |
|----|-------------|-------------|-------------|
| H  | -6.35252600 | 2.48103200  | 1.80636800  |
| H  | -6.74254200 | 0.91812300  | 1.07690900  |
| H  | -8.05211700 | 1.96536200  | 1.63674700  |
| C  | -8.09966000 | 1.68910400  | -1.04154500 |
| H  | -8.18570800 | 1.98104600  | -2.08916100 |
| H  | -9.09664500 | 1.72240500  | -0.58769700 |
| H  | -7.75224100 | 0.65118400  | -1.00838500 |
| C  | -7.37120800 | 11.43986500 | -3.54328900 |
| N  | -5.55809200 | 11.45487500 | -5.02761000 |
| C  | -7.38662500 | 12.73560000 | -4.37848600 |
| C  | -6.00517900 | 12.87889800 | -5.01035900 |
| H  | -7.65735600 | 13.61158300 | -3.77753500 |
| H  | -8.13387100 | 12.63737900 | -5.17815400 |
| C  | -7.04776100 | 11.74616600 | -2.07086100 |
| H  | -6.08110200 | 12.24476700 | -1.95594100 |
| H  | -7.02295900 | 10.84030500 | -1.46117600 |
| H  | -7.81882600 | 12.40947500 | -1.65748700 |
| C  | -8.74625300 | 10.77047200 | -3.63497800 |
| H  | -8.83127000 | 9.88426400  | -3.00240200 |
| H  | -8.96224400 | 10.47384600 | -4.66745900 |
| H  | -9.51874800 | 11.48294000 | -3.31760700 |
| C  | -5.03946100 | 13.75362300 | -4.20493800 |
| H  | -4.95336800 | 13.46165800 | -3.15733200 |
| H  | -5.38693900 | 14.79152400 | -4.23806400 |
| H  | -4.04248700 | 13.72038800 | -4.65881400 |
| C  | -6.07430100 | 13.48155300 | -6.40807700 |
| H  | -6.78665900 | 12.96157700 | -7.05277200 |
| H  | -5.08707800 | 13.47731400 | -6.88327700 |
| H  | -6.39666000 | 14.52452800 | -6.32339200 |
| B  | -6.01545300 | 9.14099700  | -3.94535300 |
| B  | -7.12339000 | 6.30174100  | -1.30093100 |
| Cl | -8.21681000 | 7.29092700  | -0.23398900 |
| C  | -6.25725400 | 10.62896300 | -4.20673400 |
| Cl | -4.92201600 | 8.15182200  | -5.01228700 |

|   |              |             |             |
|---|--------------|-------------|-------------|
| C | -8.83640700  | 4.34320600  | 0.37549700  |
| C | -9.98128400  | 4.43118000  | -0.43939400 |
| C | -8.88825200  | 4.66037000  | 1.74522000  |
| C | -11.18994600 | 4.77474900  | 0.16506800  |
| C | -10.12508000 | 4.98696600  | 2.29838300  |
| C | -11.27082100 | 5.03471400  | 1.52248700  |
| H | -12.08217900 | 4.85324800  | -0.45174200 |
| H | -12.22393300 | 5.29933500  | 1.97144400  |
| H | -10.17912800 | 5.23901200  | 3.35500500  |
| C | -7.65778300  | 4.78145700  | 2.63065400  |
| C | -7.74409000  | 3.88118800  | 3.86734600  |
| H | -7.95270000  | 2.83543200  | 3.62900700  |
| H | -8.54067600  | 4.23051900  | 4.53556300  |
| H | -6.80861600  | 3.92327100  | 4.43664400  |
| C | -7.46026300  | 6.22636400  | 3.10405300  |
| H | -6.77858200  | 4.50844200  | 2.03540600  |
| H | -6.57489200  | 6.28896300  | 3.74722100  |
| H | -8.32083200  | 6.55927900  | 3.69714400  |
| H | -7.33562100  | 6.91998200  | 2.27174800  |
| C | -9.97476900  | 4.24229000  | -1.94946500 |
| C | -10.96294600 | 3.15893300  | -2.39219800 |
| H | -10.87472500 | 2.98145500  | -3.46990100 |
| H | -11.99577900 | 3.47441100  | -2.20223700 |
| H | -10.80964800 | 2.20735900  | -1.87531300 |
| C | -10.31805500 | 5.55021200  | -2.67182700 |
| H | -8.96759900  | 3.95188000  | -2.26622100 |
| H | -10.34630700 | 5.38233600  | -3.75438400 |
| H | -9.59267000  | 6.34245600  | -2.46924600 |
| H | -11.30735800 | 5.91253900  | -2.36614700 |
| C | -4.30268500  | 11.09950400 | -5.62207100 |
| C | -3.15769500  | 11.01163400 | -4.80733400 |
| C | -3.01423500  | 10.45579000 | -7.54511700 |
| C | -1.86838400  | 10.40814700 | -6.76937700 |
| C | -1.94909100  | 10.66813200 | -5.41195200 |



|   |             |             |             |
|---|-------------|-------------|-------------|
| H | -0.91531300 | 10.14359600 | -7.21846200 |
| H | -1.05676700 | 10.58971600 | -4.79526500 |
| C | -3.16402100 | 11.20056100 | -3.29727000 |
| C | -2.82051400 | 9.89268300  | -2.57493800 |
| H | -3.54578200 | 9.10033200  | -2.77751400 |
| H | -2.79225600 | 10.06054700 | -1.49237900 |
| H | -1.83116100 | 9.53051700  | -2.88065000 |
| C | -2.17585900 | 12.28399900 | -2.85470900 |
| H | -4.17117100 | 11.49089100 | -2.98036800 |
| H | -2.26390000 | 12.46146800 | -1.77699000 |
| H | -2.32932200 | 13.23556300 | -3.37156400 |
| H | -1.14303400 | 11.96860200 | -3.04485700 |
| C | -4.25101200 | 10.78231000 | -6.99179400 |
| C | -5.48160100 | 10.66110400 | -7.87705200 |
| C | -5.67911200 | 9.21614800  | -8.35031300 |
| H | -6.56460300 | 9.15343700  | -8.99330300 |
| H | -5.80353500 | 8.52257700  | -7.51793600 |
| H | -4.81863300 | 8.88326000  | -8.94355000 |
| C | -5.39549100 | 11.56127100 | -9.11383200 |
| H | -6.36073700 | 10.93413500 | -7.28170500 |
| H | -5.18710100 | 12.60709900 | -8.87561600 |
| H | -6.33096700 | 11.51893200 | -9.68310700 |
| H | -4.59885200 | 11.21202900 | -9.78203000 |
| H | -2.96030500 | 10.20373100 | -8.60174100 |
| H | -5.87971600 | 6.50770000  | -3.19793700 |
| H | -7.25908100 | 8.93504900  | -2.04831900 |

**15. CAAC\_Full\_H\_CI (twisted)-singlet:**

|   |             |            |             |
|---|-------------|------------|-------------|
| C | -5.94244100 | 4.01662900 | -1.73507200 |
| N | -8.21069800 | 3.76377600 | -1.14118500 |
| C | -6.15255000 | 2.69139800 | -0.97239300 |
| C | -7.65124500 | 2.38681200 | -1.01680000 |
| H | -5.84819400 | 2.82818300 | 0.07584400  |
| H | -5.55037700 | 1.87405400 | -1.38597500 |
| C | -7.33180200 | 4.65607300 | -1.67870600 |
| C | -6.56304000 | 7.04102500 | -2.75937600 |
| C | -5.80151700 | 7.91612200 | -2.08326200 |
| C | -5.45648100 | 3.81353300 | -3.17554800 |
| H | -5.37183500 | 4.78290600 | -3.68043600 |
| H | -6.12550900 | 3.17996800 | -3.76472300 |
| H | -4.46142500 | 3.35104600 | -3.17321100 |
| C | -4.87906300 | 4.85011800 | -0.99806400 |
| H | -4.02215500 | 4.20427800 | -0.76353300 |
| H | -5.26875200 | 5.25349200 | -0.05359200 |
| H | -4.51442200 | 5.68376000 | -1.60166700 |
| C | -8.15509800 | 1.69659100 | 0.24026200  |
| H | -7.91520400 | 2.27545200 | 1.13830300  |
| H | -7.68191900 | 0.71327300 | 0.32715500  |
| H | -9.24127900 | 1.54953200 | 0.20454100  |
| C | -7.99539800 | 1.53221400 | -2.24266200 |

|    |              |             |             |
|----|--------------|-------------|-------------|
| H  | -7.81275400  | 2.07847600  | -3.17255300 |
| H  | -9.03839300  | 1.20856700  | -2.23470000 |
| H  | -7.36929500  | 0.63310200  | -2.24305300 |
| C  | -6.42211400  | 10.94052100 | -3.10756700 |
| N  | -4.15385900  | 11.19336900 | -3.70146100 |
| C  | -6.21200500  | 12.26575000 | -3.87024800 |
| C  | -4.71330900  | 12.57033400 | -3.82584700 |
| H  | -6.81417400  | 13.08309600 | -3.45666500 |
| H  | -6.51636500  | 12.12896600 | -4.91848400 |
| C  | -6.90806700  | 11.14362000 | -1.66708900 |
| H  | -6.99271300  | 10.17424700 | -1.16220000 |
| H  | -7.90312200  | 11.60610900 | -1.66942200 |
| H  | -6.23903500  | 11.77718400 | -1.07791800 |
| C  | -7.48549700  | 10.10703400 | -3.84457000 |
| H  | -7.85013500  | 9.27339100  | -3.24096600 |
| H  | -7.09581300  | 9.70366000  | -4.78904400 |
| H  | -8.34240600  | 10.75287300 | -4.07909600 |
| C  | -4.36915000  | 13.42493300 | -2.59998700 |
| H  | -4.55179600  | 12.87867600 | -1.67009500 |
| H  | -4.99524800  | 14.32404900 | -2.59960000 |
| H  | -3.32615400  | 13.74857400 | -2.60795200 |
| C  | -4.20946000  | 13.26055200 | -5.08291100 |
| H  | -4.44935600  | 12.68168900 | -5.98095100 |
| H  | -3.12327800  | 13.40761000 | -5.04719400 |
| H  | -4.68263800  | 14.24387000 | -5.16980500 |
| B  | -4.74845500  | 8.89161600  | -2.69168300 |
| B  | -7.61610300  | 6.06553100  | -2.15095800 |
| Cl | -9.29028400  | 6.77555600  | -2.15972500 |
| C  | -5.03275500  | 10.30107400 | -3.16393800 |
| Cl | -3.07427500  | 8.18158800  | -2.68292800 |
| C  | -9.40670400  | 4.17316300  | -0.46839700 |
| C  | -10.66761000 | 3.97403000  | -1.04730100 |
| C  | -9.27041000  | 4.82042500  | 0.77363600  |
| C  | -11.79224300 | 4.42292800  | -0.35722300 |

|   |              |             |             |
|---|--------------|-------------|-------------|
| C | -10.42196900 | 5.28096600  | 1.40851400  |
| C | -11.67610600 | 5.08184800  | 0.85486700  |
| H | -12.77524600 | 4.27349500  | -0.79782100 |
| H | -12.56271100 | 5.44469700  | 1.36683400  |
| H | -10.32831000 | 5.80585800  | 2.35641800  |
| C | -7.92895100  | 5.06824400  | 1.43999500  |
| C | -7.91596700  | 4.59083000  | 2.89400400  |
| H | -8.23571300  | 3.54748000  | 2.98836800  |
| H | -8.58195700  | 5.19659400  | 3.51891700  |
| H | -6.90882300  | 4.68099300  | 3.31531400  |
| C | -7.56092300  | 6.55306800  | 1.37991900  |
| H | -7.16213700  | 4.50203900  | 0.89691800  |
| H | -6.56331700  | 6.72595500  | 1.80213400  |
| H | -8.27922200  | 7.14502200  | 1.96223600  |
| H | -7.57467200  | 6.93612000  | 0.35349400  |
| C | -10.85721900 | 3.33015700  | -2.40447600 |
| C | -11.55286600 | 1.97432300  | -2.24666300 |
| H | -11.59364500 | 1.43262700  | -3.19885700 |
| H | -12.58529500 | 2.12253600  | -1.90460700 |
| H | -11.05924400 | 1.33617900  | -1.50473100 |
| C | -11.66874500 | 4.21119700  | -3.35683000 |
| H | -9.86564400  | 3.18899600  | -2.85030300 |
| H | -11.73212400 | 3.73866700  | -4.34342700 |
| H | -11.21892400 | 5.19967900  | -3.47443000 |
| H | -12.69538800 | 4.34428800  | -2.99612800 |
| C | -2.95785500  | 10.78397900 | -4.37425200 |
| C | -1.69694700  | 10.98311000 | -3.79535100 |
| C | -1.94259600  | 9.67617400  | -6.25116600 |
| C | -0.68845700  | 9.87528900  | -5.69752200 |
| C | -0.57231600  | 10.53420900 | -4.48543200 |
| H | 0.19814600   | 9.51243800  | -6.20949100 |
| H | 0.41068800   | 10.68364000 | -4.04483600 |
| C | -1.50733300  | 11.62698100 | -2.43817600 |
| C | -0.69580900  | 10.74593800 | -1.48582400 |

|   |             |             |             |
|---|-------------|-------------|-------------|
| H | -1.14563300 | 9.75745700  | -1.36822400 |
| H | -0.63242700 | 11.21846700 | -0.49922700 |
| H | 0.33083300  | 10.61284400 | -1.84652800 |
| C | -0.81168300 | 12.98281300 | -2.59599000 |
| H | -2.49890800 | 11.76814600 | -1.99234700 |
| H | -0.77089900 | 13.52450800 | -1.64379600 |
| H | -1.30530400 | 13.62095900 | -3.33792100 |
| H | 0.22074600  | 12.83459700 | -2.93804800 |
| C | -3.09415300 | 10.13671700 | -5.61628400 |
| C | -4.43561500 | 9.88889900  | -6.28263900 |
| C | -4.80364300 | 8.40407500  | -6.22256100 |
| H | -5.80125300 | 8.23118900  | -6.64476600 |
| H | -4.78988300 | 8.02102200  | -5.19613600 |
| H | -4.08535000 | 7.81212100  | -6.80488500 |
| C | -4.44860400 | 10.36631200 | -7.73664900 |
| H | -5.20242700 | 10.45510400 | -5.73956000 |
| H | -4.12886000 | 11.40966200 | -7.83101400 |
| H | -5.45574800 | 10.27614600 | -8.15795500 |
| H | -3.78261400 | 9.76054800  | -8.36156300 |
| H | -2.03625900 | 9.15128200  | -7.19906900 |
| H | -6.56764100 | 7.14385500  | -3.85739200 |
| H | -5.79691500 | 7.81329200  | -0.98524600 |

**16. CAAC\_Full\_H\_CI (twisted)-triplet:**

|   |             |             |             |
|---|-------------|-------------|-------------|
| C | -5.94135800 | 4.01842000  | -1.73378800 |
| N | -8.20935900 | 3.76530200  | -1.13946000 |
| C | -6.15139200 | 2.69278200  | -0.97169200 |
| C | -7.65004200 | 2.38824700  | -1.01618800 |
| H | -5.84695600 | 2.82898800  | 0.07659300  |
| H | -5.54924600 | 1.87567200  | -1.38577100 |
| C | -7.33091400 | 4.65760300  | -1.67767700 |
| C | -6.56207200 | 7.04124200  | -2.76086900 |
| C | -5.80263700 | 7.91607000  | -2.08193900 |
| C | -5.45452100 | 3.81602800  | -3.17404200 |
| H | -5.36961800 | 4.78559500  | -3.67851400 |
| H | -6.12307300 | 3.18254100  | -3.76387500 |
| H | -4.45938000 | 3.35373100  | -3.17127800 |
| C | -4.87865800 | 4.85190400  | -0.99572100 |
| H | -4.02196000 | 4.20606600  | -0.76040100 |
| H | -5.26928200 | 5.25519500  | -0.05159700 |
| H | -4.51351900 | 5.68561700  | -1.59890600 |
| C | -8.15397000 | 1.69685900  | 0.24019000  |
| H | -7.91364200 | 2.27453800  | 1.13885800  |
| H | -7.68123300 | 0.71322000  | 0.32586100  |
| H | -9.24022500 | 1.55032600  | 0.20449200  |
| C | -7.99434900 | 1.53489800  | -2.24283600 |
| H | -7.81192900 | 2.08223100  | -3.17216300 |
| H | -9.03734800 | 1.21124900  | -2.23491800 |
| H | -7.36821400 | 0.63580400  | -2.24427100 |
| C | -6.42338600 | 10.93879200 | -3.10937000 |

|    |              |             |             |
|----|--------------|-------------|-------------|
| N  | -4.15527600  | 11.19200000 | -3.70327900 |
| C  | -6.21328800  | 12.26442600 | -3.87145400 |
| C  | -4.71465300  | 12.56903200 | -3.82677100 |
| H  | -6.81552500  | 13.08152300 | -3.45748400 |
| H  | -6.51757800  | 12.12817200 | -4.91977300 |
| C  | -6.91064800  | 11.14109700 | -1.66926200 |
| H  | -6.99581100  | 10.17148800 | -1.16491200 |
| H  | -7.90573500  | 11.60350700 | -1.67227200 |
| H  | -6.24218500  | 11.77441700 | -1.07916900 |
| C  | -7.48577900  | 10.10522300 | -3.84777200 |
| H  | -7.85089300  | 9.27136100  | -3.24477700 |
| H  | -7.09486500  | 9.70217200  | -4.79188200 |
| H  | -8.34254700  | 10.75093700 | -4.08318200 |
| C  | -4.37072800  | 13.42265300 | -2.60017100 |
| H  | -4.55401700  | 12.87573200 | -1.67078400 |
| H  | -4.99656000  | 14.32195500 | -2.59941800 |
| H  | -3.32762700  | 13.74596200 | -2.60741500 |
| C  | -4.21050300  | 13.26020200 | -5.08318100 |
| H  | -4.45027200  | 12.68214400 | -5.98176900 |
| H  | -3.12430600  | 13.40710100 | -5.04709100 |
| H  | -4.68353300  | 14.24365400 | -5.16935000 |
| B  | -4.74899800  | 8.89094200  | -2.69103300 |
| B  | -7.61571100  | 6.06637700  | -2.15174400 |
| Cl | -9.28862600  | 6.77945800  | -2.15327700 |
| C  | -5.03375600  | 10.29971900 | -3.16509100 |
| Cl | -3.07597200  | 8.17808100  | -2.68896000 |
| C  | -9.40560000  | 4.17417700  | -0.46694700 |
| C  | -10.66619100 | 3.97608500  | -1.04680900 |
| C  | -9.26973100  | 4.81990500  | 0.77588800  |
| C  | -11.79105300 | 4.42465600  | -0.35687800 |
| C  | -10.42144600 | 5.28017600  | 1.41065500  |
| C  | -11.67533900 | 5.08219700  | 0.85600700  |
| H  | -12.77387200 | 4.27606700  | -0.79817500 |
| H  | -12.56210200 | 5.44483000  | 1.36785600  |

|   |              |             |             |
|---|--------------|-------------|-------------|
| H | -10.32814300 | 5.80398400  | 2.35919300  |
| C | -7.92841200  | 5.06658000  | 1.44293500  |
| C | -7.91638000  | 4.58851000  | 2.89672400  |
| H | -8.23720300  | 3.54541900  | 2.99043400  |
| H | -8.58199100  | 5.19461200  | 3.52171300  |
| H | -6.90930200  | 4.67748800  | 3.31843400  |
| C | -7.55943000  | 6.55115000  | 1.38339900  |
| H | -7.16169500  | 4.50015400  | 0.89992300  |
| H | -6.56250000  | 6.72350400  | 1.80741400  |
| H | -8.27848700  | 7.14363400  | 1.96423300  |
| H | -7.57107600  | 6.93387900  | 0.35682100  |
| C | -10.85518300 | 3.33353500  | -2.40470900 |
| C | -11.55193500 | 1.97806300  | -2.24869300 |
| H | -11.59220800 | 1.43723800  | -3.20140100 |
| H | -12.58458000 | 2.12669100  | -1.90748100 |
| H | -11.05946900 | 1.33889500  | -1.50688800 |
| C | -11.66524900 | 4.21606800  | -3.35690400 |
| H | -9.86337400  | 3.19202600  | -2.84991000 |
| H | -11.72862900 | 3.74426400  | -4.34384900 |
| H | -11.21429200 | 5.20414200  | -3.47358200 |
| H | -12.69192500 | 4.35007300  | -2.99663100 |
| C | -2.95883800  | 10.78316200 | -4.37553300 |
| C | -1.69834200  | 10.98125300 | -3.79542900 |
| C | -1.94260600  | 9.67705100  | -6.25287400 |
| C | -0.68881700  | 9.87518100  | -5.69805700 |
| C | -0.57334200  | 10.53271200 | -4.48514900 |
| H | 0.19805000   | 9.51259100  | -6.20975600 |
| H | 0.40938700   | 10.68130900 | -4.04365600 |
| C | -1.50961700  | 11.62359700 | -2.43741100 |
| C | -0.69910200  | 10.74126400 | -1.48539100 |
| H | -1.14930800  | 9.75278000  | -1.36928400 |
| H | -0.63636100  | 11.21264900 | -0.49820800 |
| H | 0.32778400   | 10.60826300 | -1.84543700 |
| C | -0.81343900  | 12.97938200 | -2.59331200 |



|   |             |             |             |
|---|-------------|-------------|-------------|
| H | -2.50149400 | 11.76458100 | -1.99217600 |
| H | -0.77340800 | 13.52022300 | -1.64060300 |
| H | -1.30617500 | 13.61830300 | -3.33516900 |
| H | 0.21926800  | 12.83116400 | -2.93452800 |
| C | -3.09446400 | 10.13724300 | -5.61830300 |
| C | -4.43568700 | 9.89018200  | -6.28540000 |
| C | -4.80437300 | 8.40553100  | -6.22557300 |
| H | -5.80148500 | 8.23294900  | -6.64907400 |
| H | -4.79212000 | 8.02284800  | -5.19898800 |
| H | -4.08550000 | 7.81313800  | -6.80673000 |
| C | -4.44778700 | 10.36791500 | -7.73928900 |
| H | -5.20251700 | 10.45658100 | -5.74252800 |
| H | -4.12746200 | 11.41113400 | -7.83321800 |
| H | -5.45478700 | 10.27837500 | -8.16106900 |
| H | -3.78184000 | 9.76196800  | -8.36407000 |
| H | -2.03571200 | 9.15315200  | -7.20137900 |
| H | -6.56094000 | 7.14162600  | -3.85894600 |
| H | -5.80371200 | 7.81566500  | -0.98386400 |

17. CAAC\_Full\_H\_CI (planar)-singlet:

|   |             |             |             |
|---|-------------|-------------|-------------|
| C | -5.87198400 | 4.00119000  | -1.83453700 |
| N | -7.67775600 | 3.97040400  | -0.35834700 |
| C | -5.82726600 | 2.71496900  | -0.98239100 |
| C | -7.18746400 | 2.55812100  | -0.31812100 |
| H | -5.06172500 | 2.83241900  | -0.20332400 |
| H | -5.55526100 | 1.83850900  | -1.58195700 |
| C | -7.03098600 | 4.78869100  | -1.20591200 |
| C | -6.49818000 | 7.04761000  | -2.46126700 |
| C | -6.65115200 | 8.39365900  | -2.80203000 |
| C | -6.19188400 | 3.68989000  | -3.30528400 |
| H | -6.23127800 | 4.60569600  | -3.90100400 |
| H | -7.15593600 | 3.18185200  | -3.41665100 |
| H | -5.41412900 | 3.03649800  | -3.72120800 |
| C | -4.48701700 | 4.65949000  | -1.73421400 |
| H | -3.72622300 | 3.87996500  | -1.87287400 |
| H | -4.33760600 | 5.10431300  | -0.74450200 |
| H | -4.30541200 | 5.42874200  | -2.48461700 |
| C | -7.07963100 | 2.03123500  | 1.10803200  |
| H | -6.36179000 | 2.59600800  | 1.70720800  |
| H | -6.73939100 | 0.99143800  | 1.06972000  |
| H | -8.05485600 | 2.04423700  | 1.60782600  |
| C | -8.13104300 | 1.61825900  | -1.07140500 |
| H | -8.22394200 | 1.85632000  | -2.13292100 |
| H | -9.12640800 | 1.63861100  | -0.61556900 |
| H | -7.74649500 | 0.59643000  | -0.98897200 |
| C | -7.27738900 | 11.44006300 | -3.42881200 |
| N | -5.47155300 | 11.47084700 | -4.90496200 |
| C | -7.32200400 | 12.72638600 | -4.28080300 |
| C | -5.96184000 | 12.88312300 | -4.94519000 |
| H | -7.59378500 | 13.60280900 | -3.68108200 |

|    |              |             |             |
|----|--------------|-------------|-------------|
| H  | -8.08766300  | 12.60919800 | -5.05978700 |
| C  | -6.95769700  | 11.75131100 | -1.95800800 |
| H  | -5.99390700  | 12.25982200 | -1.84653200 |
| H  | -6.91793500  | 10.83547400 | -1.36236500 |
| H  | -7.73578000  | 12.40431600 | -1.54208700 |
| C  | -8.66233600  | 10.78174100 | -3.52928800 |
| H  | -8.84392200  | 10.01236200 | -2.77901000 |
| H  | -8.81172600  | 10.33706500 | -4.51906600 |
| H  | -9.42315300  | 11.56122400 | -3.39051300 |
| C  | -5.01811200  | 13.82297100 | -4.19205600 |
| H  | -4.92494800  | 13.58487500 | -3.13056500 |
| H  | -5.40267000  | 14.84480400 | -4.27437600 |
| H  | -4.02284700  | 13.80262000 | -4.64811300 |
| C  | -6.06973900  | 13.40993200 | -6.37137000 |
| H  | -6.78781000  | 12.84532200 | -6.97042600 |
| H  | -5.09457300  | 13.39660600 | -6.87125800 |
| H  | -6.40966100  | 14.44983500 | -6.33311400 |
| B  | -5.83326600  | 9.16295600  | -3.78051100 |
| B  | -7.31607200  | 6.27832000  | -1.48278100 |
| Cl | -8.60939800  | 7.21858600  | -0.57008800 |
| C  | -6.11834200  | 10.65258300 | -4.05739000 |
| Cl | -4.54004100  | 8.22271800  | -4.69334100 |
| C  | -8.92246600  | 4.30584100  | 0.27569200  |
| C  | -10.10927700 | 4.28051400  | -0.47858600 |
| C  | -8.90987500  | 4.71594300  | 1.61913200  |
| C  | -11.29761400 | 4.61130600  | 0.17155100  |
| C  | -10.12683900 | 5.03362500  | 2.21826700  |
| C  | -11.31415700 | 4.97206600  | 1.50806800  |
| H  | -12.22513400 | 4.60741200  | -0.39609400 |
| H  | -12.25243100 | 5.23048700  | 1.99064100  |
| H  | -10.13402400 | 5.36533900  | 3.25392900  |
| C  | -7.63529000  | 4.94623300  | 2.41487500  |
| C  | -7.62713900  | 4.15613900  | 3.72681100  |
| H  | -7.82172300  | 3.08935200  | 3.58603500  |

|   |              |             |             |
|---|--------------|-------------|-------------|
| H | -8.39284300  | 4.54229500  | 4.41039600  |
| H | -6.66170100  | 4.26563600  | 4.23345600  |
| C | -7.45219600  | 6.43395900  | 2.73463400  |
| H | -6.78178400  | 4.63793500  | 1.79982100  |
| H | -6.54287000  | 6.57823900  | 3.32936600  |
| H | -8.29722600  | 6.80715300  | 3.32634400  |
| H | -7.38023200  | 7.04235900  | 1.83144400  |
| C | -10.17235500 | 3.99745800  | -1.97279800 |
| C | -11.13638600 | 2.85069700  | -2.29458300 |
| H | -11.08424200 | 2.59814200  | -3.35946700 |
| H | -12.17104200 | 3.14858600  | -2.08661600 |
| H | -10.93465000 | 1.94395500  | -1.71769400 |
| C | -10.61112800 | 5.23830500  | -2.75897700 |
| H | -9.17049600  | 3.73026100  | -2.32603200 |
| H | -10.71811100 | 4.98437300  | -3.81977800 |
| H | -9.89689000  | 6.05923900  | -2.67257200 |
| H | -11.58502400 | 5.59684200  | -2.40368700 |
| C | -4.22656700  | 11.13562400 | -5.53858800 |
| C | -3.04009700  | 11.16088000 | -4.78377000 |
| C | -3.02127600  | 10.40820600 | -7.48073000 |
| C | -1.83428200  | 10.46971400 | -6.76998700 |
| C | -1.85144600  | 10.83027500 | -5.43342200 |
| H | -0.89577900  | 10.21141500 | -7.25217800 |
| H | -0.92418100  | 10.83416200 | -4.86535900 |
| C | -2.97770400  | 11.44376400 | -3.28950100 |
| C | -2.53882400  | 10.20295800 | -2.50332200 |
| H | -3.25266300  | 9.38173500  | -2.59032400 |
| H | -2.43257100  | 10.45670700 | -1.44240500 |
| H | -1.56456500  | 9.84491600  | -2.85811400 |
| C | -2.01427000  | 12.59088700 | -2.96721000 |
| H | -3.97979300  | 11.71053800 | -2.93661000 |
| H | -2.06684200  | 12.84321900 | -1.90229300 |
| H | -2.21626900  | 13.49764600 | -3.54398600 |
| H | -0.97941800  | 12.29350700 | -3.17493700 |

|   |             |             |             |
|---|-------------|-------------|-------------|
| C | -4.23852900 | 10.72573800 | -6.88209800 |
| C | -5.51274500 | 10.49555700 | -7.67845100 |
| C | -5.69575600 | 9.00787500  | -7.99843400 |
| H | -6.60467200 | 8.86376700  | -8.59384500 |
| H | -5.76847000 | 8.39941400  | -7.09534800 |
| H | -4.85033500 | 8.63462900  | -8.58954500 |
| C | -5.52028800 | 11.28565000 | -8.99039300 |
| H | -6.36649700 | 10.80387200 | -7.06376700 |
| H | -5.32574500 | 12.35244600 | -8.84961600 |
| H | -6.48552700 | 11.17614400 | -9.49742300 |
| H | -4.75432500 | 10.89943700 | -9.67365400 |
| H | -3.01362000 | 10.07663600 | -8.51643600 |
| H | -5.74316400 | 6.52819500  | -3.04638400 |
| H | -7.40616100 | 8.91307700  | -2.21690500 |

**18. CAAC\_Full\_H\_CI** (planar)-triplet:

|   |             |             |             |
|---|-------------|-------------|-------------|
| C | -5.87797000 | 3.97299700  | -1.80998100 |
| N | -7.65821300 | 3.95549900  | -0.28615900 |
| C | -5.82955900 | 2.68671100  | -0.95841300 |
| C | -7.18195700 | 2.54105700  | -0.27160300 |
| H | -5.05044000 | 2.79615200  | -0.19181200 |
| H | -5.57698000 | 1.80616700  | -1.56094100 |
| C | -7.02428300 | 4.76548200  | -1.17441100 |
| C | -6.48790100 | 7.06156500  | -2.48572500 |
| C | -6.66152400 | 8.37982900  | -2.77763900 |
| C | -6.19589200 | 3.66442100  | -3.28066800 |
| H | -6.28061800 | 4.58352300  | -3.86826200 |
| H | -7.13824000 | 3.11659600  | -3.38776600 |
| H | -5.39640200 | 3.05154800  | -3.71711300 |
| C | -4.49967600 | 4.64323700  | -1.70863500 |
| H | -3.72816400 | 3.88813800  | -1.90884300 |
| H | -4.33363300 | 5.03333200  | -0.69812200 |
| H | -4.34874700 | 5.45722700  | -2.41808900 |
| C | -7.05479800 | 2.00040900  | 1.14758500  |
| H | -6.33458200 | 2.56554200  | 1.74413400  |
| H | -6.71064900 | 0.96223500  | 1.09912000  |
| H | -8.02560400 | 2.00548600  | 1.65605100  |
| C | -8.14207800 | 1.61071200  | -1.01764700 |
| H | -8.24399100 | 1.85216600  | -2.07759800 |
| H | -9.13317500 | 1.63933700  | -0.55231000 |
| H | -7.76708200 | 0.58455000  | -0.94259200 |
| C | -7.27163500 | 11.46830800 | -3.45368300 |
| N | -5.49114300 | 11.48585700 | -4.97725800 |
| C | -7.31988000 | 12.75462200 | -4.30521900 |
| C | -5.96729900 | 12.90034300 | -4.99165200 |
| H | -7.57266600 | 13.63514600 | -3.70274900 |
| H | -8.09877300 | 12.64515500 | -5.07204500 |
| C | -6.95425900 | 11.77688100 | -1.98287400 |
| H | -6.01213700 | 12.32501500 | -1.87542800 |
| H | -6.86943700 | 10.85778300 | -1.39529000 |

|    |              |             |             |
|----|--------------|-------------|-------------|
| H  | -7.75408300  | 12.38947800 | -1.54665700 |
| C  | -8.64981300  | 10.79790500 | -3.55550500 |
| H  | -8.80070400  | 9.98361400  | -2.84638600 |
| H  | -8.81561000  | 10.40815500 | -4.56619200 |
| H  | -9.42148500  | 11.55280100 | -3.35514900 |
| C  | -5.00728700  | 13.83048300 | -4.24519900 |
| H  | -4.90558700  | 13.58881800 | -3.18528100 |
| H  | -5.38221400  | 14.85668000 | -4.32013000 |
| H  | -4.01609000  | 13.80189700 | -4.71034000 |
| C  | -6.09400600  | 13.44123500 | -6.41077300 |
| H  | -6.81412900  | 12.87627000 | -7.00759300 |
| H  | -5.12305900  | 13.43607100 | -6.91896800 |
| H  | -6.43800900  | 14.47945400 | -6.36227100 |
| B  | -5.86697700  | 9.19044200  | -3.81985200 |
| B  | -7.28243900  | 6.25094400  | -1.44351700 |
| Cl | -8.50461400  | 7.20861300  | -0.49004600 |
| C  | -6.12511200  | 10.67590200 | -4.08897800 |
| Cl | -4.64479900  | 8.23276800  | -4.77332200 |
| C  | -8.90949600  | 4.29174000  | 0.32849900  |
| C  | -10.08511300 | 4.29258500  | -0.44646900 |
| C  | -8.92298300  | 4.68084400  | 1.67927700  |
| C  | -11.28226800 | 4.62712800  | 0.18507500  |
| C  | -10.14866500 | 4.99899500  | 2.26116700  |
| C  | -11.32249400 | 4.96372600  | 1.52768700  |
| H  | -12.19900800 | 4.64011000  | -0.39988700 |
| H  | -12.26763500 | 5.22223800  | 1.99666500  |
| H  | -10.17282700 | 5.30983700  | 3.30315400  |
| C  | -7.66309300  | 4.88921000  | 2.50395800  |
| C  | -7.67537900  | 4.06641300  | 3.79549000  |
| H  | -7.85512900  | 3.00169400  | 3.62510100  |
| H  | -8.46012900  | 4.42809700  | 4.47103700  |
| H  | -6.72250800  | 4.17291900  | 4.32616000  |
| C  | -7.48904100  | 6.36770700  | 2.86921300  |
| H  | -6.80071600  | 4.59847300  | 1.89303400  |

|   |              |             |             |
|---|--------------|-------------|-------------|
| H | -6.58152500  | 6.50032400  | 3.46938700  |
| H | -8.33641400  | 6.71859400  | 3.47108300  |
| H | -7.41844400  | 7.00398900  | 1.98551200  |
| C | -10.12752800 | 4.02124800  | -1.94387900 |
| C | -11.10165500 | 2.89012200  | -2.28941000 |
| H | -11.03306100 | 2.64179500  | -3.35444800 |
| H | -12.13629200 | 3.19933000  | -2.09868200 |
| H | -10.92052800 | 1.97856300  | -1.71325500 |
| C | -10.53507400 | 5.27340000  | -2.72879500 |
| H | -9.12417500  | 3.74192300  | -2.28207900 |
| H | -10.63357300 | 5.02872200  | -3.79257800 |
| H | -9.80796400  | 6.08252200  | -2.63100700 |
| H | -11.50593600 | 5.64923900  | -2.38320200 |
| C | -4.23952000  | 11.14973200 | -5.59132000 |
| C | -3.06431700  | 11.14860900 | -4.81571000 |
| C | -2.99930100  | 10.44310100 | -7.52355200 |
| C | -1.82587900  | 10.47806300 | -6.78941200 |
| C | -1.86683800  | 10.81418800 | -5.44670400 |
| H | -0.88049000  | 10.21968500 | -7.25796100 |
| H | -0.95041800  | 10.80097800 | -4.86124500 |
| C | -3.02258300  | 11.41961300 | -3.31821500 |
| C | -2.61548100  | 10.16728500 | -2.53334600 |
| H | -3.34269100  | 9.35828400  | -2.63145900 |
| H | -2.51730700  | 10.41181000 | -1.46949700 |
| H | -1.64456200  | 9.79133700  | -2.87865500 |
| C | -2.04858800  | 12.55065800 | -2.97203600 |
| H | -4.02605600  | 11.69891900 | -2.98036700 |
| H | -2.11762700  | 12.79875100 | -1.90697100 |
| H | -2.22950600  | 13.46233700 | -3.54806900 |
| H | -1.01387000  | 12.24150900 | -3.16240800 |
| C | -4.22530100  | 10.76107000 | -6.94222700 |
| C | -5.48475000  | 10.55287900 | -7.76765300 |
| C | -5.65857100  | 9.07444500  | -8.13330300 |
| H | -6.56589600  | 8.94187100  | -8.73377500 |



|   |             |             |             |
|---|-------------|-------------|-------------|
| H | -5.72936200 | 8.43796800  | -7.24977200 |
| H | -4.81098700 | 8.72377700  | -8.73500200 |
| C | -5.47180600 | 11.37589500 | -9.05903300 |
| H | -6.34745300 | 10.84348800 | -7.15711300 |
| H | -5.29248400 | 12.44064700 | -8.88839200 |
| H | -6.42428900 | 11.26920000 | -9.59036000 |
| H | -4.68650600 | 11.01453200 | -9.73411300 |
| H | -2.97456800 | 10.13262500 | -8.56563300 |
| H | -5.77901300 | 6.54006000  | -3.12719100 |
| H | -7.37042800 | 8.90134300  | -2.13619100 |

**19. CAAC\_Full\_C<sub>2</sub>H<sub>5</sub>\_H** (fully optimized)-singlet:

|   |             |            |             |
|---|-------------|------------|-------------|
| C | -6.14984000 | 3.67000800 | -2.19271200 |
| N | -7.75223700 | 3.82401000 | -0.50969800 |
| C | -6.12202000 | 2.38848500 | -1.33989800 |
| C | -7.40733900 | 2.37781800 | -0.50786600 |

|   |             |             |             |
|---|-------------|-------------|-------------|
| H | -5.26029100 | 2.43196400  | -0.65894400 |
| H | -6.01797500 | 1.48194300  | -1.94786900 |
| C | -7.07135600 | 4.58679800  | -1.40145000 |
| C | -6.42348700 | 7.03290700  | -2.49760100 |
| C | -5.51225100 | 7.91753000  | -2.01787500 |
| C | -6.73153700 | 7.00814500  | -3.98547800 |
| H | -6.42957000 | 7.96683500  | -4.44151000 |
| H | -6.10290600 | 6.25464200  | -4.49436100 |
| C | -5.21969100 | 7.90786300  | -0.52117800 |
| H | -5.19655600 | 6.86935200  | -0.14352100 |
| H | -6.07831900 | 8.37158500  | 0.00033500  |
| C | -6.74389900 | 3.39288000  | -3.58223800 |
| H | -6.73097300 | 4.29458400  | -4.19876300 |
| H | -7.78134400 | 3.04523200  | -3.52769300 |
| H | -6.15375900 | 2.62294400  | -4.09670300 |
| C | -4.74240800 | 4.24409300  | -2.34964400 |
| H | -4.06941800 | 3.48187700  | -2.76326200 |
| H | -4.34538100 | 4.56506000  | -1.37811500 |
| H | -4.72951400 | 5.11170700  | -3.01510800 |
| C | -7.15392400 | 1.85410800  | 0.90191300  |
| H | -6.31232400 | 2.36712100  | 1.37416300  |
| H | -6.90954100 | 0.78794700  | 0.84506200  |
| H | -8.04098200 | 1.96116400  | 1.53745800  |
| C | -8.53974100 | 1.54724400  | -1.11529000 |
| H | -8.77665800 | 1.83577500  | -2.14214800 |
| H | -9.44624700 | 1.65424600  | -0.50782300 |
| H | -8.25868400 | 0.48865700  | -1.11391200 |
| C | -6.46306300 | 10.98655500 | -2.94836600 |
| N | -4.48745700 | 11.11044700 | -4.17144600 |
| C | -6.53271300 | 12.20342400 | -3.89048900 |
| C | -5.12877000 | 12.41712600 | -4.46692100 |
| H | -6.90272200 | 13.10114500 | -3.38075300 |
| H | -7.22930700 | 11.98275600 | -4.71072900 |
| C | -6.27055200 | 11.40633900 | -1.48365700 |

|   |              |             |             |
|---|--------------|-------------|-------------|
| H | -5.34233600  | 11.97639000 | -1.34604100 |
| H | -6.21489200  | 10.51880400 | -0.84266700 |
| H | -7.11113400  | 12.02582200 | -1.14337400 |
| C | -7.74406700  | 10.16256000 | -3.06899000 |
| H | -7.74388500  | 9.30516800  | -2.38906300 |
| H | -7.87456900  | 9.79117700  | -4.09321300 |
| H | -8.60826000  | 10.79579600 | -2.82890100 |
| C | -4.37016800  | 13.56001300 | -3.79576500 |
| H | -4.30651300  | 13.43552300 | -2.71031300 |
| H | -4.87911900  | 14.50759700 | -4.00287000 |
| H | -3.35550700  | 13.62828100 | -4.20304800 |
| C | -5.17270800  | 12.69054800 | -5.96840800 |
| H | -5.76227600  | 11.93345800 | -6.49304300 |
| H | -4.16616400  | 12.72085500 | -6.40271100 |
| H | -5.64389300  | 13.66400300 | -6.14171000 |
| B | -4.68686400  | 8.91066400  | -2.91560100 |
| B | -7.21295900  | 6.09864000  | -1.50847200 |
| C | -5.19879300  | 10.26323500 | -3.38909700 |
| C | -8.81445400  | 4.30827300  | 0.31495900  |
| C | -10.11720100 | 4.38268500  | -0.20716200 |
| C | -8.53946700  | 4.69478200  | 1.63774500  |
| C | -11.15624000 | 4.71878800  | 0.66152200  |
| C | -9.61152900  | 5.02557800  | 2.46591900  |
| C | -10.91420100 | 5.00786100  | 1.99430200  |
| H | -12.17072700 | 4.77512200  | 0.27346700  |
| H | -11.73804700 | 5.25838800  | 2.65657900  |
| H | -9.41305800  | 5.32434900  | 3.49274100  |
| C | -7.12810300  | 4.90115400  | 2.15827200  |
| C | -6.85704800  | 4.15709900  | 3.46709200  |
| H | -7.07640600  | 3.08768800  | 3.40351900  |
| H | -7.46897700  | 4.57069900  | 4.27774700  |
| H | -5.80967200  | 4.27609300  | 3.76578200  |
| C | -6.89777200  | 6.40140400  | 2.37424900  |
| H | -6.42076100  | 4.56448800  | 1.38704900  |

|   |              |             |             |
|---|--------------|-------------|-------------|
| H | -5.85180600  | 6.60040100  | 2.63618100  |
| H | -7.52565000  | 6.76827400  | 3.19660400  |
| H | -7.14662700  | 6.97330100  | 1.47678800  |
| C | -10.42629000 | 4.25719300  | -1.68933100 |
| C | -11.52279100 | 3.23823000  | -1.99841600 |
| H | -11.69117700 | 3.17794100  | -3.07932900 |
| H | -12.47418500 | 3.53641600  | -1.54210600 |
| H | -11.28218000 | 2.23477800  | -1.63597900 |
| C | -10.84508700 | 5.63707600  | -2.21121200 |
| H | -9.50790700  | 3.96787500  | -2.21809000 |
| H | -10.99091000 | 5.61567700  | -3.29762800 |
| H | -10.08778500 | 6.39335400  | -1.97782500 |
| H | -11.79086900 | 5.94827200  | -1.74971400 |
| C | -3.20604500  | 10.79762200 | -4.71921100 |
| C | -2.03866100  | 11.14122300 | -4.01713400 |
| C | -1.89283200  | 9.96617700  | -6.55129800 |
| C | -0.73659900  | 10.40078500 | -5.92239000 |
| C | -0.81128900  | 10.95410700 | -4.65469000 |
| H | 0.22840700   | 10.26927800 | -6.40367800 |
| H | 0.10248800   | 11.22293900 | -4.12928800 |
| C | -2.04089300  | 11.54144600 | -2.55048400 |
| C | -1.35621500  | 10.42920000 | -1.74482400 |
| H | -1.78162900  | 9.44981700  | -1.97766200 |
| H | -1.46316300  | 10.60841700 | -0.66857700 |
| H | -0.28343400  | 10.39847600 | -1.97413600 |
| C | -1.32305100  | 12.86179500 | -2.26766400 |
| H | -3.08465600  | 11.60618900 | -2.20934800 |
| H | -1.34275600  | 13.07995900 | -1.19410200 |
| H | -1.75871700  | 13.71442700 | -2.79361700 |
| H | -0.26835200  | 12.79498400 | -2.56122600 |
| C | -3.14332600  | 10.14229800 | -5.96026900 |
| C | -4.35975600  | 9.51244400  | -6.61574600 |
| C | -4.24757600  | 7.98790100  | -6.50049200 |
| H | -5.14812000  | 7.50066800  | -6.89324400 |

|   |             |             |             |
|---|-------------|-------------|-------------|
| H | -4.11386700 | 7.67754000  | -5.45820100 |
| H | -3.38634000 | 7.62448600  | -7.07627000 |
| C | -4.51741100 | 9.91385300  | -8.08247100 |
| H | -5.25710100 | 9.81929300  | -6.06024400 |
| H | -4.52333000 | 10.99989200 | -8.21892900 |
| H | -5.44919000 | 9.51018400  | -8.49352100 |
| H | -3.69845300 | 9.50979000  | -8.68930600 |
| H | -1.82779900 | 9.46242700  | -7.51305600 |
| C | -8.19789100 | 6.72993600  | -4.29923900 |
| H | -8.50945100 | 5.74805000  | -3.91430700 |
| H | -8.84541200 | 7.47511800  | -3.81823700 |
| H | -8.40183500 | 6.74809000  | -5.37570900 |
| C | -3.93971000 | 8.62437000  | -0.11312400 |
| H | -3.06094100 | 8.14039000  | -0.55380100 |
| H | -3.93568500 | 9.66898300  | -0.46182900 |
| H | -3.80916400 | 8.63451100  | 0.97412300  |
| H | -7.94881400 | 6.61878500  | -0.70471200 |
| H | -3.55474000 | 8.62872000  | -3.21479300 |

**20. CAAC\_Full\_C<sub>2</sub>H<sub>5</sub>\_H (fully optimized)-triplet:**

|   |             |            |             |
|---|-------------|------------|-------------|
| C | -5.76256400 | 4.00587400 | -1.78016100 |
| N | -7.65569200 | 3.88030800 | -0.43293800 |
| C | -5.62786000 | 2.79973400 | -0.83152800 |
| C | -7.00069300 | 2.56965800 | -0.19009200 |
| H | -4.90084200 | 3.04431500 | -0.04470000 |
| H | -5.26306500 | 1.90351700 | -1.34772800 |
| C | -6.99008600 | 4.73289900 | -1.25007400 |
| C | -6.67580200 | 7.12402100 | -2.52256700 |

|   |             |             |             |
|---|-------------|-------------|-------------|
| C | -5.76656000 | 7.99634300  | -2.02837400 |
| C | -6.94158800 | 7.12219600  | -4.02305700 |
| H | -6.89481600 | 8.15223000  | -4.42167800 |
| H | -6.10902700 | 6.59411700  | -4.52681900 |
| C | -5.46047100 | 8.00639500  | -0.53940600 |
| H | -5.73426400 | 7.03447700  | -0.09322900 |
| H | -6.10617100 | 8.73906300  | -0.02055900 |
| C | -6.05513500 | 3.56554200  | -3.22218700 |
| H | -6.15208800 | 4.44241900  | -3.87160300 |
| H | -6.98815300 | 2.99314800  | -3.29349300 |
| H | -5.23743600 | 2.94215000  | -3.60814100 |
| C | -4.47502100 | 4.82959000  | -1.76535200 |
| H | -3.62446800 | 4.17873000  | -2.00734600 |
| H | -4.29791400 | 5.26068100  | -0.77204500 |
| H | -4.50027100 | 5.64755900  | -2.49234900 |
| C | -6.88140700 | 2.27352400  | 1.30261200  |
| H | -6.26904200 | 3.02423900  | 1.80967200  |
| H | -6.40020200 | 1.29887200  | 1.43724200  |
| H | -7.86563700 | 2.23284900  | 1.78470200  |
| C | -7.79275700 | 1.43343300  | -0.83577800 |
| H | -7.90526200 | 1.56112100  | -1.91625400 |
| H | -8.78935300 | 1.36760300  | -0.38482500 |
| H | -7.27995900 | 0.48248800  | -0.65547000 |
| C | -6.14375600 | 11.30883600 | -2.46650000 |
| N | -4.46412700 | 11.17973200 | -4.07344400 |
| C | -6.19340900 | 12.56406000 | -3.35585600 |
| C | -4.88240500 | 12.60471400 | -4.14719800 |
| H | -6.35235400 | 13.48174800 | -2.77701000 |
| H | -7.03090200 | 12.46818600 | -4.06109400 |
| C | -5.60653200 | 11.63915200 | -1.06615600 |
| H | -4.59470200 | 12.05812700 | -1.10023000 |
| H | -5.57119700 | 10.73961700 | -0.44560500 |
| H | -6.26122900 | 12.36854900 | -0.57088100 |
| C | -7.53211900 | 10.68328400 | -2.33835600 |

|   |              |             |             |
|---|--------------|-------------|-------------|
| H | -7.53895300  | 9.85307800  | -1.62666300 |
| H | -7.87447300  | 10.29527700 | -3.30640200 |
| H | -8.25159300  | 11.43797200 | -1.99514400 |
| C | -3.81631700  | 13.51849100 | -3.54058500 |
| H | -3.60070700  | 13.28449700 | -2.49506200 |
| H | -4.15268400  | 14.55938800 | -3.59550800 |
| H | -2.88531000  | 13.43643700 | -4.11367100 |
| C | -5.11421100  | 13.05209200 | -5.58691700 |
| H | -5.91086400  | 12.47318400 | -6.06132400 |
| H | -4.20143100  | 12.96436600 | -6.18813700 |
| H | -5.41643500  | 14.10486300 | -5.58757300 |
| B | -4.93561900  | 8.91943200  | -3.00009800 |
| B | -7.49144400  | 6.11938200  | -1.62509700 |
| C | -5.15152700  | 10.41276500 | -3.19145600 |
| C | -8.91477400  | 4.18174100  | 0.171104200 |
| C | -10.10591800 | 3.86136600  | -0.50169300 |
| C | -8.93548500  | 4.80438500  | 1.43009700  |
| C | -11.31206000 | 4.03938100  | 0.17734600  |
| C | -10.16613600 | 4.97013300  | 2.06446900  |
| C | -11.34415400 | 4.55971900  | 1.46069800  |
| H | -12.24315200 | 3.78913800  | -0.32634200 |
| H | -12.29291600 | 4.68443800  | 1.97494600  |
| H | -10.19790400 | 5.44849900  | 3.04078800  |
| C | -7.69799900  | 5.41453300  | 2.06416800  |
| C | -7.48421400  | 4.95743800  | 3.50752900  |
| H | -7.46588800  | 3.86750400  | 3.60346900  |
| H | -8.28434300  | 5.33208300  | 4.15699700  |
| H | -6.54142600  | 5.35347000  | 3.90062600  |
| C | -7.82081200  | 6.94204000  | 2.01793300  |
| H | -6.82209600  | 5.13569200  | 1.46159100  |
| H | -6.90513700  | 7.41675900  | 2.39052100  |
| H | -8.65583200  | 7.27672900  | 2.64710700  |
| H | -8.00209400  | 7.29508100  | 0.99728800  |
| C | -10.15016200 | 3.49017400  | -1.97474800 |

|   |              |             |             |
|---|--------------|-------------|-------------|
| C | -10.90010300 | 2.18858800  | -2.25905300 |
| H | -10.90179700 | 1.97952600  | -3.33458600 |
| H | -11.94837700 | 2.27121800  | -1.94741300 |
| H | -10.47045800 | 1.32391500  | -1.74695700 |
| C | -10.82658700 | 4.63399000  | -2.74144600 |
| H | -9.11836600  | 3.40740800  | -2.34426000 |
| H | -10.76741700 | 4.46439800  | -3.82299700 |
| H | -10.35734700 | 5.59539100  | -2.51455900 |
| H | -11.88786100 | 4.69973500  | -2.46965400 |
| C | -3.34971700  | 10.71957200 | -4.84088200 |
| C | -2.06275400  | 10.74317800 | -4.27685500 |
| C | -2.44372800  | 9.95993000  | -6.93330300 |
| C | -1.16020500  | 10.07582100 | -6.42441100 |
| C | -0.97837200  | 10.43351500 | -5.09860800 |
| H | -0.30213600  | 9.84788900  | -7.05042500 |
| H | 0.02458900   | 10.45312800 | -4.67824700 |
| C | -1.81187200  | 10.94372600 | -2.79189400 |
| C | -1.32363400  | 9.61438900  | -2.20290700 |
| H | -2.01637900  | 8.79990000  | -2.43833800 |
| H | -1.22586100  | 9.68349400  | -1.11310600 |
| H | -0.33974700  | 9.35408500  | -2.61350100 |
| C | -0.79107000  | 12.04005800 | -2.48774000 |
| H | -2.76479300  | 11.19210800 | -2.30467500 |
| H | -0.66127600  | 12.14776900 | -1.40517800 |
| H | -1.07973600  | 13.01365000 | -2.89332500 |
| H | 0.19073400   | 11.78511000 | -2.90423000 |
| C | -3.55923200  | 10.26091400 | -6.15249800 |
| C | -4.93914900  | 9.94542400  | -6.70178400 |
| C | -5.07036500  | 8.42461200  | -6.84469000 |
| H | -6.09522800  | 8.14503900  | -7.11688800 |
| H | -4.80807500  | 7.91707500  | -5.91254200 |
| H | -4.39994400  | 8.05722300  | -7.63252200 |
| C | -5.21382100  | 10.60708200 | -8.05298700 |
| H | -5.68943400  | 10.27554400 | -5.96905500 |



|   |             |             |             |
|---|-------------|-------------|-------------|
| H | -5.06382000 | 11.69022800 | -8.03478900 |
| H | -6.24170300 | 10.40779100 | -8.37550300 |
| H | -4.55178900 | 10.19614100 | -8.82462500 |
| H | -2.59120100 | 9.60654500  | -7.95133100 |
| C | -8.26137000 | 6.47889600  | -4.42698400 |
| H | -8.31880000 | 5.43536600  | -4.08070300 |
| H | -9.10900600 | 7.00796200  | -3.97523800 |
| H | -8.40257200 | 6.47900600  | -5.51301500 |
| C | -4.00062000 | 8.32001400  | -0.23197700 |
| H | -3.33752400 | 7.60431400  | -0.73670600 |
| H | -3.72374000 | 9.31891400  | -0.60123800 |
| H | -3.78368000 | 8.28702900  | 0.84128100  |
| H | -8.57800100 | 6.43520200  | -1.21224500 |
| H | -4.09535000 | 8.40022600  | -3.69611100 |

**21. CAAC\_Full\_C<sub>2</sub>H<sub>5</sub>\_H (twisted)-singlet:**

|   |             |            |             |
|---|-------------|------------|-------------|
| C | -5.91982500 | 3.88518700 | -1.93680700 |
| N | -7.74752100 | 3.87351800 | -0.50024400 |
| C | -5.85049000 | 2.63107700 | -1.04743100 |
| C | -7.20899600 | 2.49636100 | -0.34998900 |
| H | -5.07040900 | 2.77542300 | -0.28685400 |
| H | -5.59149900 | 1.73031800 | -1.61691300 |
| C | -7.03158700 | 4.70425100 | -1.29734500 |
| C | -6.57992800 | 7.10616800 | -2.52764300 |
| C | -5.59454400 | 7.89800700 | -2.04376800 |
| C | -6.91341300 | 7.15550700 | -4.01145800 |
| H | -6.71646200 | 8.16498700 | -4.41396600 |
| H | -6.21283400 | 6.50069700 | -4.56275300 |

|   |             |             |             |
|---|-------------|-------------|-------------|
| C | -5.26123900 | 7.84897000  | -0.55989700 |
| H | -5.45773300 | 6.83944900  | -0.15726800 |
| H | -5.96224500 | 8.50348200  | -0.00880300 |
| C | -6.35208900 | 3.53363700  | -3.36874700 |
| H | -6.41953800 | 4.44057700  | -3.97788600 |
| H | -7.33364500 | 3.04581500  | -3.39111400 |
| H | -5.62186400 | 2.85939300  | -3.83623700 |
| C | -4.56188300 | 4.58367100  | -1.98475900 |
| H | -3.79386800 | 3.86928600  | -2.30885500 |
| H | -4.27668600 | 4.96037800  | -0.99444000 |
| H | -4.56238000 | 5.42761600  | -2.68092100 |
| C | -7.04692200 | 2.10988400  | 1.11806900  |
| H | -6.33698800 | 2.76621400  | 1.62826700  |
| H | -6.66014300 | 1.08674600  | 1.17599000  |
| H | -8.00490200 | 2.13797500  | 1.65104700  |
| C | -8.14065800 | 1.47513800  | -1.00219700 |
| H | -8.30321500 | 1.67003200  | -2.06567800 |
| H | -9.11180700 | 1.47980800  | -0.49416700 |
| H | -7.71368200 | 0.47180900  | -0.89909000 |
| C | -6.25511600 | 11.11885200 | -2.63520000 |
| N | -4.42716300 | 11.13055400 | -4.07146300 |
| C | -6.32429300 | 12.37290800 | -3.52467100 |
| C | -4.96561100 | 12.50772800 | -4.22170000 |
| H | -6.58354500 | 13.27368600 | -2.95533600 |
| H | -7.10413200 | 12.22842800 | -4.28547000 |
| C | -5.82342200 | 11.47041600 | -1.20309300 |
| H | -4.84168300 | 11.95786100 | -1.18029700 |
| H | -5.75659300 | 10.56352900 | -0.59381900 |
| H | -6.55361900 | 12.14497400 | -0.73601500 |
| C | -7.61305100 | 10.42028500 | -2.58783000 |
| H | -7.61257200 | 9.57575200  | -1.89237600 |
| H | -7.89822800 | 10.04442900 | -3.57847000 |
| H | -8.38108800 | 11.13440500 | -2.26320300 |
| C | -4.03408900 | 13.52879200 | -3.56906000 |

|   |              |             |             |
|---|--------------|-------------|-------------|
| H | -3.87189800  | 13.33376100 | -2.50554900 |
| H | -4.46091400  | 14.53218200 | -3.67220200 |
| H | -3.06278600  | 13.52405300 | -4.07678700 |
| C | -5.12723500  | 12.89439300 | -5.68975600 |
| H | -5.83704700  | 12.23815000 | -6.20023300 |
| H | -4.16910300  | 12.86631800 | -6.22246500 |
| H | -5.51395300  | 13.91755400 | -5.74767500 |
| B | -4.75885200  | 8.85956700  | -2.97125200 |
| B | -7.41569400  | 6.14457200  | -1.60029500 |
| C | -5.14302900  | 10.29987300 | -3.27425600 |
| C | -8.93380200  | 4.26153800  | 0.19522900  |
| C | -10.18669500 | 4.09709100  | -0.41843700 |
| C | -8.82230900  | 4.80285000  | 1.48705800  |
| C | -11.32951800 | 4.34567200  | 0.34320900  |
| C | -9.99308100  | 5.04470500  | 2.20470900  |
| C | -11.23793900 | 4.78600100  | 1.65323000  |
| H | -12.30760100 | 4.21533900  | -0.11457500 |
| H | -12.13930300 | 4.96723700  | 2.23187700  |
| H | -9.92254300  | 5.46190400  | 3.20667300  |
| C | -7.49790100  | 5.25373300  | 2.07707700  |
| C | -7.25086700  | 4.69831000  | 3.48009900  |
| H | -7.33785800  | 3.60836900  | 3.52209700  |
| H | -7.97060700  | 5.11397600  | 4.19525800  |
| H | -6.25217700  | 4.97766100  | 3.83332200  |
| C | -7.47452300  | 6.78583200  | 2.11600000  |
| H | -6.68795900  | 4.92902200  | 1.40896600  |
| H | -6.49435200  | 7.15244200  | 2.44393900  |
| H | -8.22936800  | 7.16065500  | 2.81952400  |
| H | -7.68993800  | 7.20916400  | 1.12979700  |
| C | -10.35032800 | 3.82063300  | -1.90363600 |
| C | -11.23509200 | 2.61196100  | -2.20970600 |
| H | -11.31872800 | 2.46791400  | -3.29262700 |
| H | -12.25104600 | 2.77061500  | -1.82825600 |
| H | -10.85932300 | 1.68330300  | -1.77273500 |

|   |              |             |             |
|---|--------------|-------------|-------------|
| C | -10.95904700 | 5.06562300  | -2.56207200 |
| H | -9.35381700  | 3.66537500  | -2.34126200 |
| H | -10.98516900 | 4.95474300  | -3.65244900 |
| H | -10.38566200 | 5.96469500  | -2.31791000 |
| H | -11.98973300 | 5.21405800  | -2.21574900 |
| C | -3.24073900  | 10.74256700 | -4.76669100 |
| C | -1.98794700  | 10.90708500 | -4.15287900 |
| C | -2.18120500  | 9.95956400  | -6.77610300 |
| C | -0.93642400  | 10.21828900 | -6.22445000 |
| C | -0.84502200  | 10.65856100 | -4.91439800 |
| H | -0.03497900  | 10.03710100 | -6.80298600 |
| H | 0.13300100   | 10.78888000 | -4.45648400 |
| C | -1.82451300  | 11.18334100 | -2.66762100 |
| C | -1.21582000  | 9.93825500  | -2.00932600 |
| H | -1.78892100  | 9.03914600  | -2.25400700 |
| H | -1.19024900  | 10.04878300 | -0.91890000 |
| H | -0.18492900  | 9.79018200  | -2.35518900 |
| C | -0.93981700  | 12.39198400 | -2.36121700 |
| H | -2.82106400  | 11.33853200 | -2.23003500 |
| H | -0.85608600  | 12.53563000 | -1.27825000 |
| H | -1.31569300  | 13.32078000 | -2.79779200 |
| H | 0.07611300   | 12.23355600 | -2.74281800 |
| C | -3.35206200  | 10.20133900 | -6.05857000 |
| C | -4.67640800  | 9.75045000  | -6.64872700 |
| C | -4.69982400  | 8.21834700  | -6.68753000 |
| H | -5.67994700  | 7.85173600  | -7.01561300 |
| H | -4.48459100  | 7.79508700  | -5.70125800 |
| H | -3.94486200  | 7.84345000  | -7.39089100 |
| C | -4.92324100  | 10.30577700 | -8.05182100 |
| H | -5.48643500  | 10.07524100 | -5.98075500 |
| H | -4.83618200  | 11.39571100 | -8.09388400 |
| H | -5.92190300  | 10.02645500 | -8.40514700 |
| H | -4.20343800  | 9.89002500  | -8.76686600 |
| H | -2.25160600  | 9.54241300  | -7.77809600 |

|   |             |            |             |
|---|-------------|------------|-------------|
| C | -8.34182200 | 6.73661000 | -4.33239400 |
| H | -8.53044800 | 5.70160700 | -4.00802000 |
| H | -9.06283300 | 7.37130600 | -3.80053400 |
| H | -8.56061400 | 6.79675100 | -5.40369300 |
| C | -3.83307800 | 8.26860700 | -0.23882000 |
| H | -3.11172400 | 7.63411100 | -0.77048700 |
| H | -3.64489100 | 9.30363400 | -0.56341000 |
| H | -3.61437200 | 8.20877600 | 0.83251400  |
| H | -8.42945500 | 6.55659100 | -1.09241300 |
| H | -3.74507800 | 8.44757800 | -3.47911200 |

**22. CAAC\_Full\_C<sub>2</sub>H<sub>5</sub>\_H (twisted)-triplet:**

|   |             |            |             |
|---|-------------|------------|-------------|
| C | -5.91992400 | 3.88475500 | -1.93826200 |
| N | -7.74907700 | 3.87185800 | -0.50339900 |
| C | -5.85185100 | 2.62947600 | -1.05043500 |
| C | -7.21078500 | 2.49456900 | -0.35388200 |
| H | -5.07204800 | 2.77233100 | -0.28930100 |
| H | -5.59312000 | 1.72928000 | -1.62093400 |
| C | -7.03239900 | 4.70327000 | -1.29935300 |
| C | -6.57945500 | 7.10639200 | -2.52861900 |
| C | -5.59540200 | 7.89790200 | -2.04285800 |
| C | -6.91357100 | 7.15745700 | -4.01266600 |
| H | -6.72000800 | 8.16739000 | -4.41522500 |
| H | -6.21187300 | 6.50485200 | -4.56496300 |
| C | -5.26145700 | 7.84715600 | -0.55872500 |
| H | -5.45404700 | 6.83703900 | -0.15613700 |
| H | -5.96394000 | 8.49901200 | -0.00658300 |
| C | -6.35030600 | 3.53558100 | -3.37130900 |

|   |             |             |             |
|---|-------------|-------------|-------------|
| H | -6.41644200 | 4.44356600  | -3.97910400 |
| H | -7.33215900 | 3.04838600  | -3.39568100 |
| H | -5.61981700 | 2.86177000  | -3.83901100 |
| C | -4.56177200 | 4.58304400  | -1.98317600 |
| H | -3.79367500 | 3.86942200  | -2.30875100 |
| H | -4.27718100 | 4.95658200  | -0.99149500 |
| H | -4.56151500 | 5.42905200  | -2.67681600 |
| C | -7.04973000 | 2.10686500  | 1.11399200  |
| H | -6.33981400 | 2.76248600  | 1.62513700  |
| H | -6.66344100 | 1.08351300  | 1.17139000  |
| H | -8.00800900 | 2.13498700  | 1.64644500  |
| C | -8.14202600 | 1.47404600  | -1.00766500 |
| H | -8.30314000 | 1.66968600  | -2.07124600 |
| H | -9.11375100 | 1.47879400  | -0.50076900 |
| H | -7.71552600 | 0.47050400  | -0.90463500 |
| C | -6.25547100 | 11.11951600 | -2.63450100 |
| N | -4.42536400 | 11.13227000 | -4.06822100 |
| C | -6.32268900 | 12.37490900 | -3.52227300 |
| C | -4.96326900 | 12.50968600 | -4.21783900 |
| H | -6.58168300 | 13.27509500 | -2.95188600 |
| H | -7.10196600 | 12.23225600 | -4.28398200 |
| C | -5.82695500 | 11.46855700 | -1.20088800 |
| H | -4.84480100 | 11.95512700 | -1.17517400 |
| H | -5.76230800 | 10.56060100 | -0.59290400 |
| H | -6.55769100 | 12.14286800 | -0.73430300 |
| C | -7.61365000 | 10.42112900 | -2.59146300 |
| H | -7.61439400 | 9.57424200  | -1.89888500 |
| H | -7.89750100 | 10.04889300 | -3.58384900 |
| H | -8.38200700 | 11.13434500 | -2.26560800 |
| C | -4.03231600 | 13.52983900 | -3.56306900 |
| H | -3.87175800 | 13.33356800 | -2.49950900 |
| H | -4.45872100 | 14.53345800 | -3.66576400 |
| H | -3.06033700 | 13.52532500 | -4.06947700 |
| C | -5.12314900 | 12.89772400 | -5.68573900 |

|   |              |             |             |
|---|--------------|-------------|-------------|
| H | -5.83268500  | 12.24222700 | -6.19757200 |
| H | -4.16445700  | 12.86966700 | -6.21744700 |
| H | -5.50936000  | 13.92110100 | -5.74322000 |
| B | -4.75855900  | 8.86078300  | -2.96917400 |
| B | -7.41627000  | 6.14354100  | -1.60230500 |
| C | -5.14225900  | 10.30107800 | -3.27223100 |
| C | -8.93567600  | 4.25955400  | 0.19162200  |
| C | -10.18836600 | 4.09585900  | -0.42257700 |
| C | -8.82451700  | 4.80009200  | 1.48382400  |
| C | -11.33138900 | 4.34456000  | 0.33876100  |
| C | -9.99543600  | 5.04204100  | 2.20119200  |
| C | -11.24018200 | 4.78420100  | 1.64903200  |
| H | -12.30934000 | 4.21486200  | -0.11948600 |
| H | -12.14171800 | 4.96556000  | 2.22737400  |
| H | -9.92512700  | 5.45864600  | 3.20341800  |
| C | -7.50012400  | 5.25026500  | 2.07440200  |
| C | -7.25387500  | 4.69471700  | 3.47747700  |
| H | -7.34111500  | 3.60477500  | 3.51923600  |
| H | -7.97383300  | 5.11042200  | 4.19239200  |
| H | -6.25527600  | 4.97378800  | 3.83117600  |
| C | -7.47609700  | 6.78232400  | 2.11301000  |
| H | -6.69006500  | 4.92513100  | 1.40664700  |
| H | -6.49610200  | 7.14867600  | 2.44174600  |
| H | -8.23149700  | 7.15767800  | 2.81565400  |
| H | -7.69051900  | 7.20537200  | 1.12643400  |
| C | -10.35180800 | 3.81980700  | -1.90782300 |
| C | -11.23618800 | 2.61095500  | -2.21449600 |
| H | -11.32060500 | 2.46814300  | -3.29752500 |
| H | -12.25191100 | 2.76872900  | -1.83207500 |
| H | -10.85971500 | 1.68193900  | -1.77895500 |
| C | -10.96113000 | 5.06470900  | -2.56593000 |
| H | -9.35522000  | 3.66508200  | -2.34552300 |
| H | -10.98466000 | 4.95514200  | -3.65650300 |
| H | -10.38965500 | 5.96436400  | -2.31956000 |

|   |              |             |             |
|---|--------------|-------------|-------------|
| H | -11.99283700 | 5.21103700  | -2.22175600 |
| C | -3.23866600  | 10.74441900 | -4.76292500 |
| C | -1.98604400  | 10.90845900 | -4.14862500 |
| C | -2.17858000  | 9.96167600  | -6.77220000 |
| C | -0.93393200  | 10.21999600 | -6.22003600 |
| C | -0.84291300  | 10.65992000 | -4.90984000 |
| H | -0.03231900  | 10.03877800 | -6.79830000 |
| H | 0.13497600   | 10.78992700 | -4.45154500 |
| C | -1.82299300  | 11.18424000 | -2.66320800 |
| C | -1.21363200  | 9.93939800  | -2.00506700 |
| H | -1.78527600  | 9.03977300  | -2.25108100 |
| H | -1.18968100  | 10.04920100 | -0.91452800 |
| H | -0.18208100  | 9.79286800  | -2.34961900 |
| C | -0.93877300  | 12.39309300 | -2.35607300 |
| H | -2.81974200  | 11.33878100 | -2.22576600 |
| H | -0.85483500  | 12.53582200 | -1.27299700 |
| H | -1.31504900  | 13.32214500 | -2.79170600 |
| H | 0.07712600   | 12.23533600 | -2.73804200 |
| C | -3.34961400  | 10.20355400 | -6.05499200 |
| C | -4.67391200  | 9.75324200  | -6.64567500 |
| C | -4.69798300  | 8.22116900  | -6.68378100 |
| H | -5.67785000  | 7.85473700  | -7.01280500 |
| H | -4.48395300  | 7.79840400  | -5.69699700 |
| H | -3.94231200  | 7.84558700  | -7.38601200 |
| C | -4.91982500  | 10.30831300 | -8.04900200 |
| H | -5.48410100  | 10.07868500 | -5.97820200 |
| H | -4.83220400  | 11.39821200 | -8.09117800 |
| H | -5.91847600  | 10.02943500 | -8.40270500 |
| H | -4.19992700  | 9.89208500  | -8.76367200 |
| H | -2.24871800  | 9.54483300  | -7.77433700 |
| C | -8.34099800  | 6.73433700  | -4.33118200 |
| H | -8.52617000  | 5.69984100  | -4.00248500 |
| H | -9.06309700  | 7.36876100  | -3.80050500 |
| H | -8.56150200  | 6.78998900  | -5.40234200 |



|   |             |            |             |
|---|-------------|------------|-------------|
| C | -3.83452300 | 8.27164200 | -0.23995100 |
| H | -3.11179100 | 7.63778900 | -0.77043100 |
| H | -3.65012800 | 9.30624800 | -0.56873500 |
| H | -3.61420200 | 8.21629500 | 0.83126400  |
| H | -8.43242400 | 6.55445900 | -1.09846400 |
| H | -3.74211600 | 8.44995600 | -3.47247900 |

**23. CAAC\_Full\_C<sub>2</sub>H<sub>5</sub>\_H** (planar)-singlet:

|   |             |            |             |
|---|-------------|------------|-------------|
| C | -5.44943700 | 3.63711800 | -1.44812500 |
| N | -7.61380500 | 3.85525500 | -0.63048300 |
| C | -5.83201700 | 2.38399800 | -0.61997700 |
| C | -7.35248400 | 2.39798200 | -0.49791300 |
| H | -5.39197000 | 2.45192800 | 0.38521400  |
| H | -5.46292100 | 1.45948700 | -1.07916300 |
| C | -6.68878500 | 4.53958700 | -1.35313300 |
| C | -6.27896900 | 7.06151900 | -2.55160600 |
| C | -6.87131400 | 8.35366100 | -2.77382200 |
| C | -4.97296800 | 6.74085600 | -3.25701900 |
| H | -4.53896700 | 5.85229300 | -2.80489500 |
| H | -4.22967400 | 7.53469800 | -3.12203100 |
| C | -8.17737700 | 8.67421600 | -2.06846400 |
| H | -8.92053500 | 7.88025200 | -2.20348900 |
| H | -8.61150600 | 9.56270200 | -2.52065300 |
| C | -5.07543300 | 3.23041000 | -2.87955600 |
| H | -5.82920600 | 2.56441900 | -3.31031100 |
| H | -4.12386300 | 2.68383700 | -2.86769100 |
| H | -4.97152600 | 4.08228300 | -3.55244900 |
| C | -4.26555000 | 4.31146900 | -0.73064600 |

|   |             |             |             |
|---|-------------|-------------|-------------|
| H | -3.43722000 | 3.59384600  | -0.65524000 |
| H | -4.55581500 | 4.59736000  | 0.28771000  |
| H | -3.89536800 | 5.20677800  | -1.22896400 |
| C | -7.86348100 | 1.82810400  | 0.81774500  |
| H | -7.41056900 | 2.31339300  | 1.68640900  |
| H | -7.61696400 | 0.76209100  | 0.85878700  |
| H | -8.95276100 | 1.92460600  | 0.89312700  |
| C | -8.01458200 | 1.63031700  | -1.64761800 |
| H | -7.77089800 | 2.07335000  | -2.61801500 |
| H | -9.10274400 | 1.61786600  | -1.53927000 |
| H | -7.66471400 | 0.59192000  | -1.64097500 |
| C | -7.70020000 | 11.77831900 | -3.87745300 |
| N | -5.53590700 | 11.55962900 | -4.69511200 |
| C | -7.31730700 | 13.03141000 | -4.70548100 |
| C | -5.79685100 | 13.01694500 | -4.82782900 |
| H | -7.68597000 | 13.95598800 | -4.24608100 |
| H | -7.75758500 | 12.96379400 | -5.71059300 |
| C | -8.07398300 | 12.18491300 | -2.44594600 |
| H | -7.31952300 | 12.84992100 | -2.01485300 |
| H | -8.17896400 | 11.33289800 | -1.77341500 |
| H | -9.02495400 | 12.73253300 | -2.45777200 |
| C | -8.88425500 | 11.10423000 | -4.59486600 |
| H | -9.25429000 | 10.20878200 | -4.09668100 |
| H | -8.59422700 | 10.81859800 | -5.61336200 |
| H | -9.71260800 | 11.82186600 | -4.66989400 |
| C | -5.13433700 | 13.78461300 | -3.67837000 |
| H | -5.37810100 | 13.34190200 | -2.70784400 |
| H | -5.48382300 | 14.82313600 | -3.68522100 |
| H | -4.04618100 | 13.79663600 | -3.78684000 |
| C | -5.28594300 | 13.58652700 | -6.14366000 |
| H | -5.73937900 | 13.10148700 | -7.01218500 |
| H | -4.19673600 | 13.48946600 | -6.21937400 |
| H | -5.53191500 | 14.65266800 | -6.18464300 |
| B | -6.13216100 | 9.41951300  | -3.55673400 |

|   |              |             |             |
|---|--------------|-------------|-------------|
| B | -7.01802900  | 5.99558200  | -1.76870800 |
| C | -6.46110500  | 10.87554300 | -3.97246800 |
| C | -8.71256900  | 4.48435800  | 0.03865900  |
| C | -9.96433500  | 4.61286200  | -0.57514800 |
| C | -8.45556600  | 5.02955600  | 1.30848100  |
| C | -10.97559400 | 5.26921600  | 0.12666100  |
| C | -9.49113600  | 5.69780700  | 1.95908600  |
| C | -10.74573600 | 5.81112800  | 1.38020000  |
| H | -11.95260700 | 5.38093100  | -0.33876100 |
| H | -11.54175600 | 6.33380300  | 1.90282300  |
| H | -9.30488400  | 6.14481200  | 2.93257400  |
| C | -7.08633000  | 4.97581800  | 1.96591500  |
| C | -7.17000900  | 4.54679700  | 3.43176900  |
| H | -7.75470500  | 3.62887700  | 3.55961200  |
| H | -7.63564700  | 5.32311100  | 4.04955500  |
| H | -6.16670100  | 4.37641700  | 3.83695300  |
| C | -6.37269500  | 6.32448700  | 1.85081200  |
| H | -6.47633000  | 4.23574000  | 1.43287900  |
| H | -5.40448600  | 6.29266800  | 2.36566600  |
| H | -6.97531700  | 7.11706000  | 2.31414600  |
| H | -6.19852500  | 6.59916700  | 0.80391000  |
| C | -10.24178000 | 4.14624800  | -1.99025200 |
| C | -11.34998200 | 3.08998800  | -2.00530900 |
| H | -11.47537100 | 2.66449700  | -3.00726400 |
| H | -12.30877800 | 3.53997200  | -1.71822500 |
| H | -11.15664700 | 2.27162500  | -1.30273500 |
| C | -10.62977100 | 5.31366800  | -2.90039400 |
| H | -9.31852500  | 3.71701000  | -2.39465100 |
| H | -10.83829200 | 4.94912700  | -3.91273100 |
| H | -9.82622500  | 6.05239100  | -2.96181200 |
| H | -11.53524400 | 5.81484900  | -2.53730700 |
| C | -4.43729600  | 10.93011900 | -5.36411900 |
| C | -3.18561800  | 10.80124100 | -4.75020900 |
| C | -3.65918300  | 9.71577700  | -7.28416300 |

|   |             |             |             |
|---|-------------|-------------|-------------|
| C | -2.40468500 | 9.60199800  | -6.70514700 |
| C | -2.17463300 | 10.14419900 | -5.45176400 |
| H | -1.60888900 | 9.07876200  | -7.22755100 |
| H | -1.19770100 | 10.03215900 | -4.98625000 |
| C | -2.90803000 | 11.26814700 | -3.33522700 |
| C | -2.52056500 | 10.10087100 | -2.42467700 |
| H | -3.32438800 | 9.36246800  | -2.36307800 |
| H | -2.31201100 | 10.46568200 | -1.41244200 |
| H | -1.61523700 | 9.59923700  | -2.78750500 |
| C | -1.79939200 | 12.32395200 | -3.32044800 |
| H | -3.83111400 | 11.69788900 | -2.93099500 |
| H | -1.67382700 | 12.74965200 | -2.31860400 |
| H | -1.99237900 | 13.14221200 | -4.02323400 |
| H | -0.84078300 | 11.87349000 | -3.60741100 |
| C | -4.69447300 | 10.38471400 | -6.63381400 |
| C | -6.06363400 | 10.43893800 | -7.29136700 |
| C | -6.77783700 | 9.09057400  | -7.17629400 |
| H | -7.74598700 | 9.12279100  | -7.69123700 |
| H | -6.95222900 | 8.81602300  | -6.12939400 |
| H | -6.17552100 | 8.29771500  | -7.63953200 |
| C | -5.97959800 | 10.86792400 | -8.75721000 |
| H | -6.67341000 | 11.17925600 | -6.75841200 |
| H | -5.39458000 | 11.78565500 | -8.88494300 |
| H | -6.98278400 | 11.03862900 | -9.16256300 |
| H | -5.51409800 | 10.09146500 | -9.37491800 |
| H | -3.84558700 | 9.26857800  | -8.25753400 |
| C | -8.01138300 | 8.94933500  | -0.57290800 |
| H | -7.76570600 | 8.03535800  | -0.02349900 |
| H | -7.19984900 | 9.66939000  | -0.40203700 |
| H | -8.93034300 | 9.36320800  | -0.13838500 |
| C | -5.13916900 | 6.46578700  | -4.75258700 |
| H | -4.22037500 | 6.05170900  | -5.18726300 |
| H | -5.95089000 | 5.74589800  | -4.92336300 |
| H | -5.38471700 | 7.37981700  | -5.30195900 |

|   |             |            |             |
|---|-------------|------------|-------------|
| H | -8.09632300 | 6.28303100 | -1.36000200 |
| H | -5.05384900 | 9.13194000 | -3.96525500 |

**24. CAAC\_Full\_C<sub>2</sub>H<sub>5</sub>\_H (planar)-triplet:**

|   |             |            |             |
|---|-------------|------------|-------------|
| C | -5.69496700 | 3.41027800 | -1.97858200 |
| N | -7.57166500 | 3.78691300 | -0.68742500 |
| C | -5.84530000 | 2.26056600 | -0.96639200 |
| C | -7.23907100 | 2.37681200 | -0.35410700 |
| H | -5.09049200 | 2.38810200 | -0.17698300 |
| H | -5.67256700 | 1.28214900 | -1.43201100 |
| C | -6.64783000 | 4.48050600 | -1.43266400 |
| C | -6.26891400 | 7.08571500 | -2.59535300 |
| C | -6.88117400 | 8.32903900 | -2.73035400 |
| C | -4.78708400 | 6.93322100 | -2.91201800 |
| H | -4.36522300 | 6.21995800 | -2.19748000 |
| H | -4.24692900 | 7.86697200 | -2.73107500 |
| C | -8.36306300 | 8.48142800 | -2.41387400 |
| H | -8.90309300 | 7.54753600 | -2.59434900 |
| H | -8.78501000 | 9.19431100 | -3.12877100 |
| C | -6.22302400 | 2.99973000 | -3.36397900 |
| H | -7.27763000 | 2.70991700 | -3.32838100 |
| H | -5.64254800 | 2.15568000 | -3.76144000 |
| H | -6.14008300 | 3.83627900 | -4.06481200 |
| C | -4.20847700 | 3.73586800 | -2.10530400 |
| H | -3.65909400 | 2.79238500 | -2.22270200 |
| H | -3.82374200 | 4.23589800 | -1.20965600 |
| H | -3.98321500 | 4.34732600 | -2.98038000 |
| C | -7.21738600 | 2.13867200 | 1.15742600  |

|   |             |             |             |
|---|-------------|-------------|-------------|
| H | -6.44767700 | 2.73265700  | 1.65508700  |
| H | -6.99617900 | 1.08276400  | 1.34572200  |
| H | -8.18967000 | 2.36452300  | 1.61152700  |
| C | -8.25195700 | 1.38988900  | -0.94315000 |
| H | -8.26647100 | 1.38604500  | -2.03512000 |
| H | -9.25994100 | 1.61571900  | -0.57639500 |
| H | -7.99559600 | 0.37876600  | -0.60993800 |
| C | -7.45516800 | 12.00433800 | -3.34735600 |
| N | -5.57836400 | 11.62774500 | -4.63828400 |
| C | -7.30477600 | 13.15405400 | -4.35953400 |
| C | -5.91090100 | 13.03783900 | -4.97163300 |
| H | -7.47760800 | 14.13246900 | -3.89395200 |
| H | -8.05947100 | 13.02644900 | -5.14903800 |
| C | -6.92723000 | 12.41489100 | -1.96194700 |
| H | -5.87277800 | 12.70522600 | -1.99768600 |
| H | -7.00964700 | 11.57824100 | -1.26119900 |
| H | -7.50797900 | 13.25866600 | -1.56432600 |
| C | -8.94168700 | 11.67873500 | -3.22095800 |
| H | -9.16720500 | 11.06714600 | -2.34605600 |
| H | -9.32619600 | 11.17882800 | -4.11677500 |
| H | -9.49109300 | 12.62220300 | -3.10357700 |
| C | -4.89803700 | 14.02472000 | -4.38246100 |
| H | -4.88387200 | 14.02876300 | -3.29048800 |
| H | -5.15410100 | 15.03583100 | -4.71592800 |
| H | -3.88997100 | 13.79863600 | -4.74883600 |
| C | -5.93244700 | 13.27599300 | -6.48317700 |
| H | -6.70214100 | 12.68204400 | -6.98091100 |
| H | -4.96015000 | 13.05011200 | -6.93722000 |
| H | -6.15360200 | 14.33191100 | -6.67148200 |
| B | -6.17018500 | 9.46850700  | -3.52756800 |
| B | -6.97993900 | 5.94620000  | -1.79810600 |
| C | -6.50221900 | 10.93417200 | -3.89303600 |
| C | -8.69679900 | 4.42603900  | -0.07701300 |
| C | -9.93461900 | 4.40727100  | -0.73708300 |

|   |              |             |             |
|---|--------------|-------------|-------------|
| C | -8.51123500  | 5.16327700  | 1.10575300  |
| C | -11.00841100 | 5.07634200  | -0.14920800 |
| C | -9.61520100  | 5.81349100  | 1.65512100  |
| C | -10.85828800 | 5.76373900  | 1.04359800  |
| H | -11.96990500 | 5.08173600  | -0.65774600 |
| H | -11.70406800 | 6.28359100  | 1.48458900  |
| H | -9.48644100  | 6.39350400  | 2.56645900  |
| C | -7.15452700  | 5.37110400  | 1.75907000  |
| C | -7.17079900  | 4.96045400  | 3.23342600  |
| H | -7.55194200  | 3.94438000  | 3.37762800  |
| H | -7.80509500  | 5.63622800  | 3.81943800  |
| H | -6.16295700  | 5.01511200  | 3.66007300  |
| C | -6.70909400  | 6.83166700  | 1.63538700  |
| H | -6.41237500  | 4.76443800  | 1.22709600  |
| H | -5.75528100  | 6.98162300  | 2.15451900  |
| H | -7.44701900  | 7.50452500  | 2.09155000  |
| H | -6.57981000  | 7.13080000  | 0.58935200  |
| C | -10.11674100 | 3.81405900  | -2.12277500 |
| C | -11.31370000 | 2.86591900  | -2.19775000 |
| H | -11.35649600 | 2.37855700  | -3.17793200 |
| H | -12.25681000 | 3.41042600  | -2.06940600 |
| H | -11.27755700 | 2.08654400  | -1.42945700 |
| C | -10.26545100 | 4.92778900  | -3.16292100 |
| H | -9.21017600  | 3.25871800  | -2.37799400 |
| H | -10.46246400 | 4.50172000  | -4.15365000 |
| H | -9.35602800  | 5.53378100  | -3.22681200 |
| H | -11.10182500 | 5.59158900  | -2.90878400 |
| C | -4.45292700  | 10.98871900 | -5.24822300 |
| C | -3.21534200  | 11.00751900 | -4.58769300 |
| C | -3.53379300  | 9.60151800  | -6.98018300 |
| C | -2.29093600  | 9.65131400  | -6.36820800 |
| C | -2.14130000  | 10.33858400 | -5.17526000 |
| H | -1.44494700  | 9.13159300  | -6.80895100 |
| H | -1.17997800  | 10.33322200 | -4.66640000 |

|   |             |             |             |
|---|-------------|-------------|-------------|
| C | -3.03373900 | 11.60065600 | -3.20189400 |
| C | -2.88529800 | 10.48686900 | -2.16175600 |
| H | -3.79467900 | 9.88078700  | -2.09815500 |
| H | -2.68860600 | 10.91290000 | -1.17094900 |
| H | -2.04878500 | 9.82315900  | -2.41567800 |
| C | -1.83679800 | 12.54878500 | -3.12640400 |
| H | -3.94040700 | 12.15597900 | -2.94696000 |
| H | -1.79442300 | 13.03613700 | -2.14620000 |
| H | -1.87256400 | 13.32816600 | -3.89470200 |
| H | -0.89365000 | 12.00424100 | -3.25432200 |
| C | -4.63800700 | 10.25157600 | -6.43111800 |
| C | -5.99450300 | 10.04362900 | -7.08482700 |
| C | -6.43976900 | 8.58300500  | -6.96125900 |
| H | -7.39345100 | 8.43291900  | -7.48059400 |
| H | -6.56922700 | 8.28386200  | -5.91524700 |
| H | -5.70165000 | 7.91024300  | -7.41725300 |
| C | -5.97790900 | 10.45432700 | -8.55916100 |
| H | -6.73686800 | 10.65018400 | -6.55302600 |
| H | -5.59696200 | 11.47049500 | -8.70322300 |
| H | -6.98561900 | 10.39945800 | -8.98609000 |
| H | -5.34329800 | 9.77871900  | -9.14502300 |
| H | -3.66218200 | 9.02158500  | -7.89162400 |
| C | -8.65473500 | 8.94363700  | -0.98792600 |
| H | -8.47051200 | 8.13429800  | -0.27165000 |
| H | -8.01472600 | 9.78590300  | -0.69717900 |
| H | -9.69878600 | 9.25937600  | -0.86721700 |
| C | -4.49545500 | 6.47164800  | -4.33810200 |
| H | -3.45191200 | 6.15415000  | -4.45856700 |
| H | -5.13676400 | 5.63065600  | -4.62979800 |
| H | -4.67790100 | 7.28179400  | -5.05391300 |
| H | -8.00909300 | 6.26698400  | -1.30389600 |
| H | -5.14092600 | 9.14771900  | -4.02151300 |



**25. CAAC\_Full\_CH<sub>3</sub>\_H** (fully optimized)-singlet:

|   |             |            |             |
|---|-------------|------------|-------------|
| C | -5.83011800 | 3.85100900 | -1.79189100 |
| N | -7.69507800 | 3.82374000 | -0.40465700 |
| C | -5.81447300 | 2.56004500 | -0.94947600 |
| C | -7.19193800 | 2.43098300 | -0.28977900 |
| H | -5.04821900 | 2.65382400 | -0.16761800 |
| H | -5.56576100 | 1.67546100 | -1.54807400 |
| C | -6.95943200 | 4.66101600 | -1.17571100 |
| C | -6.63133900 | 7.10600800 | -2.41530900 |
| C | -5.55231300 | 7.87896600 | -2.15249800 |
| C | -7.38180700 | 7.26554800 | -3.71926200 |
| H | -7.50232700 | 6.30604500 | -4.24439900 |
| H | -6.88690200 | 7.97326100 | -4.40510200 |
| H | -8.40548200 | 7.63342900 | -3.54327200 |
| C | -4.80184600 | 7.71942500 | -0.84854500 |
| H | -4.68133800 | 8.67892400 | -0.32340000 |
| H | -3.77816700 | 7.35155600 | -1.02453600 |
| H | -5.29674600 | 7.01170200 | -0.16271200 |
| C | -6.18079500 | 3.58173100 | -3.26217600 |
| H | -6.18209900 | 4.52427600 | -3.82088400 |
| H | -7.17151700 | 3.12450800 | -3.37037500 |
| H | -5.43952300 | 2.91249000 | -3.71893000 |
| C | -4.46924700 | 4.53895800 | -1.72978900 |
| H | -3.69264400 | 3.85288100 | -2.09211100 |
| H | -4.21988300 | 4.82227700 | -0.70041400 |
| H | -4.45084100 | 5.43938200 | -2.35024500 |
| C | -7.09190700 | 1.99556300 | 1.17010200  |
| H | -6.38276900 | 2.61322300 | 1.72756000  |
| H | -6.74197900 | 0.95881700 | 1.21313200  |
| H | -8.06896900 | 2.04184200 | 1.66646100  |

|   |              |             |             |
|---|--------------|-------------|-------------|
| C | -8.11576400  | 1.44734300  | -1.00965100 |
| H | -8.18363500  | 1.64197100  | -2.08352500 |
| H | -9.12249900  | 1.49049000  | -0.57896500 |
| H | -7.73622300  | 0.42901200  | -0.87393600 |
| C | -6.35353800  | 11.13396400 | -2.77593800 |
| N | -4.48859100  | 11.16121800 | -4.16318800 |
| C | -6.36919700  | 12.42491300 | -3.61837500 |
| C | -4.99174000  | 12.55397000 | -4.27808900 |
| H | -6.61790600  | 13.30950600 | -3.01978900 |
| H | -7.13546100  | 12.33111700 | -4.40022200 |
| C | -6.00284200  | 11.40326900 | -1.30566200 |
| H | -5.01212100  | 11.86049800 | -1.19748400 |
| H | -6.00152600  | 10.46073300 | -0.74693800 |
| H | -6.74411100  | 12.07251400 | -0.84890900 |
| C | -7.71440800  | 10.44601000 | -2.83801000 |
| H | -7.73280300  | 9.54559500  | -2.21754200 |
| H | -7.96378600  | 10.16267800 | -3.86737700 |
| H | -8.49100700  | 11.13209100 | -2.47568500 |
| C | -4.06791500  | 13.53763300 | -3.55824900 |
| H | -4.00003700  | 13.34303400 | -2.48437100 |
| H | -4.44746100  | 14.55595800 | -3.69398900 |
| H | -3.06118200  | 13.49448000 | -3.98893900 |
| C | -5.09179200  | 12.98935600 | -5.73798000 |
| H | -5.80092700  | 12.37167300 | -6.29541600 |
| H | -4.11473400  | 12.94307900 | -6.23434800 |
| H | -5.44173500  | 14.02609600 | -5.78103000 |
| B | -4.84878800  | 8.86876800  | -3.14641700 |
| B | -7.33486400  | 6.11620400  | -1.42139300 |
| C | -5.22422700  | 10.32395100 | -3.39211600 |
| C | -8.90314900  | 4.23406900  | 0.23732300  |
| C | -10.12210000 | 4.15035900  | -0.45581000 |
| C | -8.83307900  | 4.77719800  | 1.53019600  |
| C | -11.28837500 | 4.50156100  | 0.22437900  |
| C | -10.02625300 | 5.11546100  | 2.16765500  |

|   |              |             |             |
|---|--------------|-------------|-------------|
| C | -11.24768500 | 4.95496500  | 1.53302800  |
| H | -12.24163100 | 4.44194300  | -0.29626400 |
| H | -12.16771200 | 5.21916800  | 2.04679100  |
| H | -9.98989200  | 5.53611700  | 3.17011700  |
| C | -7.51761500  | 5.12285000  | 2.20608400  |
| C | -7.40485700  | 4.51989400  | 3.60679600  |
| H | -7.56549300  | 3.43725800  | 3.60934000  |
| H | -8.14494100  | 4.96467100  | 4.28282600  |
| H | -6.41685300  | 4.72226200  | 4.03493000  |
| C | -7.36663800  | 6.64601400  | 2.28280000  |
| H | -6.69556100  | 4.74603300  | 1.58341200  |
| H | -6.40341500  | 6.91409700  | 2.73206200  |
| H | -8.15963800  | 7.08094800  | 2.90480300  |
| H | -7.42623700  | 7.10357600  | 1.28976600  |
| C | -10.21003000 | 3.82451800  | -1.93723300 |
| C | -11.19575000 | 2.69589700  | -2.24174500 |
| H | -11.18480800 | 2.45822300  | -3.31120700 |
| H | -12.22049800 | 2.99506000  | -1.99073100 |
| H | -10.97539100 | 1.77900800  | -1.68738600 |
| C | -10.61773100 | 5.07933700  | -2.71721300 |
| H | -9.21258700  | 3.53481600  | -2.28720400 |
| H | -10.65222100 | 4.86672200  | -3.79190200 |
| H | -9.91529800  | 5.90169200  | -2.54855600 |
| H | -11.61623200 | 5.41663300  | -2.41051600 |
| C | -3.28052600  | 10.75088300 | -4.80517500 |
| C | -2.06156600  | 10.83461700 | -4.11206000 |
| C | -2.15744100  | 9.86945200  | -6.73550000 |
| C | -0.93600100  | 10.02997300 | -6.10089300 |
| C | -0.89529800  | 10.48340800 | -4.79225500 |
| H | -0.01597900  | 9.76576600  | -6.61466300 |
| H | 0.05796500   | 10.54304500 | -4.27162500 |
| C | -1.97362000  | 11.16049400 | -2.63064600 |
| C | -1.56591300  | 9.90569500  | -1.85063700 |
| H | -2.26836000  | 9.08334200  | -2.01925000 |

|   |             |             |             |
|---|-------------|-------------|-------------|
| H | -1.53139400 | 10.11834300 | -0.77595500 |
| H | -0.56742400 | 9.56837800  | -2.15734700 |
| C | -0.98789400 | 12.28912100 | -2.32617300 |
| H | -2.97105800 | 11.45020800 | -2.28067100 |
| H | -0.99883200 | 12.52683100 | -1.25672000 |
| H | -1.20825200 | 13.20599300 | -2.88056200 |
| H | 0.03685200  | 11.98994700 | -2.57718200 |
| C | -3.35060900 | 10.20772000 | -6.09803300 |
| C | -4.66607800 | 9.86203700  | -6.77389300 |
| C | -4.81703400 | 8.33886900  | -6.85058000 |
| H | -5.78026200 | 8.07076400  | -7.29981900 |
| H | -4.75740800 | 7.88132400  | -5.85754000 |
| H | -4.02404100 | 7.90393600  | -7.47259300 |
| C | -4.77886600 | 10.46496300 | -8.17461700 |
| H | -5.48812900 | 10.23885200 | -6.15121700 |
| H | -4.61824900 | 11.54760200 | -8.17718500 |
| H | -5.76687200 | 10.26256900 | -8.60273200 |
| H | -4.03878400 | 10.02018400 | -8.85064800 |
| H | -2.19381200 | 9.44877200  | -7.73795200 |
| H | -8.33281500 | 6.51454200  | -0.87764700 |
| H | -3.85083300 | 8.47043000  | -3.69015300 |

**26. CAAC\_Full\_CH<sub>3</sub>\_H** (fully optimized)-triplet:

|   |             |            |             |
|---|-------------|------------|-------------|
| C | -5.84667400 | 3.84132400 | -1.83445300 |
| N | -7.70730000 | 3.81727700 | -0.44244300 |
| C | -5.82439400 | 2.55418000 | -0.98645100 |
| C | -7.19573800 | 2.42934600 | -0.31204100 |
| H | -5.04956400 | 2.64958200 | -0.21339800 |
| H | -5.58348900 | 1.66673400 | -1.58410800 |
| C | -6.97048100 | 4.65500400 | -1.21305700 |
| C | -6.63525000 | 7.11624000 | -2.42869600 |
| C | -5.54841900 | 7.86872000 | -2.13914500 |
| C | -7.38267600 | 7.31692000 | -3.72985700 |
| H | -7.48439300 | 6.37538900 | -4.29028900 |
| H | -6.89942400 | 8.05485800 | -4.38941400 |
| H | -8.41311300 | 7.65921700 | -3.54212800 |
| C | -4.80099400 | 7.66803900 | -0.83798300 |
| H | -4.69927700 | 8.60957000 | -0.27755100 |
| H | -3.77055600 | 7.32574300 | -1.02571300 |
| H | -5.28424500 | 6.93010100 | -0.17842700 |
| C | -6.21924900 | 3.56504500 | -3.29831300 |
| H | -6.23779700 | 4.50636100 | -3.85954900 |
| H | -7.20872800 | 3.10091800 | -3.38752600 |
| H | -5.48145400 | 2.89951700 | -3.76612300 |
| C | -4.48291600 | 4.52420500 | -1.79484400 |
| H | -3.71682800 | 3.83756500 | -2.17780600 |
| H | -4.21061000 | 4.79800300 | -0.76895400 |
| H | -4.47253700 | 5.42923300 | -2.40889300 |
| C | -7.07892500 | 2.02018100 | 1.15450100  |
| H | -6.37051800 | 2.65472000 | 1.69382000  |
| H | -6.71887900 | 0.98765800 | 1.21328500  |
| H | -8.05177500 | 2.06708700 | 1.65909200  |
| C | -8.11947200 | 1.42782200 | -1.00667300 |
| H | -8.19302200 | 1.60019100 | -2.08405400 |
| H | -9.12423800 | 1.47525100 | -0.57195900 |
| H | -7.73474400 | 0.41408500 | -0.85240600 |

|   |              |             |             |
|---|--------------|-------------|-------------|
| C | -6.33699400  | 11.14363600 | -2.73339100 |
| N | -4.47636900  | 11.16768000 | -4.12540200 |
| C | -6.35927400  | 12.43077800 | -3.58139500 |
| C | -4.98793100  | 12.55561000 | -4.25580700 |
| H | -6.60017900  | 13.31822600 | -2.98374000 |
| H | -7.13410600  | 12.33537500 | -4.35444800 |
| C | -5.96441700  | 11.41991700 | -1.26953200 |
| H | -4.97493800  | 11.88404500 | -1.18032000 |
| H | -5.94586900  | 10.47860300 | -0.70829400 |
| H | -6.70221200  | 12.08544700 | -0.80172200 |
| C | -7.70075200  | 10.46075500 | -2.77299600 |
| H | -7.71113000  | 9.55572800  | -2.15894600 |
| H | -7.97306000  | 10.18695600 | -3.79888500 |
| H | -8.46683900  | 11.14739600 | -2.39003400 |
| C | -4.06419700  | 13.55713600 | -3.56117800 |
| H | -3.99064600  | 13.38477000 | -2.48379600 |
| H | -4.44892500  | 14.57087300 | -3.71544800 |
| H | -3.05943000  | 13.50970600 | -3.99589300 |
| C | -5.10474600  | 12.96477200 | -5.72235000 |
| H | -5.81315200  | 12.33023100 | -6.26166600 |
| H | -4.13189600  | 12.91786500 | -6.22694200 |
| H | -5.46479200  | 13.99729400 | -5.78113600 |
| B | -4.82827600  | 8.87983900  | -3.09917900 |
| B | -7.35539300  | 6.10512000  | -1.46866200 |
| C | -5.21318700  | 10.32995400 | -3.35478600 |
| C | -8.90967200  | 4.23317100  | 0.20610600  |
| C | -10.13579000 | 4.13032600  | -0.47141100 |
| C | -8.82731600  | 4.80523700  | 1.48579800  |
| C | -11.29604600 | 4.49111700  | 0.21394000  |
| C | -10.01490700 | 5.15121600  | 2.12954100  |
| C | -11.24268800 | 4.97186500  | 1.51235300  |
| H | -12.25471900 | 4.41722300  | -0.29479200 |
| H | -12.15802500 | 5.24297400  | 2.03088600  |
| H | -9.96925000  | 5.59329600  | 3.12237400  |

|   |              |             |             |
|---|--------------|-------------|-------------|
| C | -7.50618700  | 5.17377600  | 2.13831800  |
| C | -7.37110600  | 4.59893000  | 3.54880600  |
| H | -7.52042400  | 3.51491900  | 3.57342300  |
| H | -8.10815000  | 5.04873600  | 4.22484300  |
| H | -6.38042900  | 4.81941000  | 3.96150800  |
| C | -7.36656000  | 6.69942700  | 2.18350000  |
| H | -6.68861700  | 4.79144900  | 1.51278500  |
| H | -6.39765800  | 6.98388200  | 2.61007300  |
| H | -8.15216400  | 7.13990900  | 2.81095400  |
| H | -7.44735900  | 7.13777800  | 1.18310700  |
| C | -10.23750600 | 3.77292500  | -1.94461000 |
| C | -11.22810100 | 2.63961100  | -2.21423700 |
| H | -11.22132800 | 2.37125200  | -3.27642700 |
| H | -12.25112300 | 2.94921500  | -1.96888800 |
| H | -11.00914200 | 1.73831100  | -1.63417200 |
| C | -10.64876800 | 5.00992400  | -2.75073800 |
| H | -9.24395200  | 3.47272100  | -2.29603100 |
| H | -10.71065800 | 4.76629600  | -3.81758400 |
| H | -9.93315700  | 5.82842300  | -2.62297300 |
| H | -11.63599000 | 5.36801100  | -2.43148400 |
| C | -3.27399700  | 10.75178400 | -4.77395100 |
| C | -2.04787900  | 10.85463100 | -4.09643600 |
| C | -2.16876400  | 9.83373300  | -6.69738500 |
| C | -0.94098300  | 10.01308700 | -6.08019800 |
| C | -0.88762400  | 10.49383800 | -4.78178700 |
| H | -0.02564600  | 9.74197600  | -6.59873100 |
| H | 0.07105000   | 10.56773300 | -4.27305500 |
| C | -1.94616100  | 11.21203600 | -2.62323700 |
| C | -1.53490000  | 9.97503900  | -1.81710600 |
| H | -2.25051200  | 9.15654100  | -1.94486700 |
| H | -1.47300800  | 10.21867100 | -0.75026100 |
| H | -0.54767900  | 9.61694900  | -2.13636100 |
| C | -0.95556600  | 12.34535000 | -2.35361400 |
| H | -2.93971500  | 11.51224200 | -2.27181600 |

|   |             |             |             |
|---|-------------|-------------|-------------|
| H | -0.96233800 | 12.61371300 | -1.29142500 |
| H | -1.17452400 | 13.24664800 | -2.93368200 |
| H | 0.06745600  | 12.03574500 | -2.59896300 |
| C | -3.35635500 | 10.17971500 | -6.05364200 |
| C | -4.67748400 | 9.81117300  | -6.70615900 |
| C | -4.81711000 | 8.28552200  | -6.75133800 |
| H | -5.78601300 | 8.00106500  | -7.17790800 |
| H | -4.73630900 | 7.84717300  | -5.75094400 |
| H | -4.03150800 | 7.84503900  | -7.37879100 |
| C | -4.81256800 | 10.38601600 | -8.11664800 |
| H | -5.49505400 | 10.19350100 | -6.08062500 |
| H | -4.66325000 | 11.47002700 | -8.14126700 |
| H | -5.80324500 | 10.16553400 | -8.52934900 |
| H | -4.07552400 | 9.93620800  | -8.79268400 |
| H | -2.21442200 | 9.39165200  | -7.69021700 |
| H | -8.38103400 | 6.48755700  | -0.96676700 |
| H | -3.80263400 | 8.49740100  | -3.60107300 |

**27. CAAC\_Full\_CH<sub>3</sub>\_H (twisted)-singlet:**

|   |             |            |             |
|---|-------------|------------|-------------|
| C | -5.87566000 | 3.81403500 | -1.89289100 |
| N | -7.70666500 | 3.81776400 | -0.45764300 |
| C | -5.84004700 | 2.54015500 | -1.02392700 |



|   |             |             |             |
|---|-------------|-------------|-------------|
| C | -7.19757200 | 2.42978800  | -0.31969000 |
| H | -5.04929500 | 2.64382500  | -0.26854900 |
| H | -5.61529600 | 1.64217300  | -1.61199000 |
| C | -7.00563300 | 4.62868600  | -1.28542800 |
| C | -6.60514900 | 7.09176200  | -2.46640800 |
| C | -5.57836100 | 7.89309100  | -2.10122500 |
| C | -7.29151000 | 7.30146900  | -3.79807100 |
| H | -7.34066300 | 6.37628600  | -4.39111100 |
| H | -6.79687700 | 8.07366400  | -4.41046700 |
| H | -8.33875700 | 7.61379300  | -3.65141200 |
| C | -4.89203900 | 7.68338600  | -0.76954900 |
| H | -4.84317700 | 8.60849700  | -0.17637500 |
| H | -3.84470500 | 7.37133700  | -0.91616900 |
| H | -5.38653200 | 6.91099700  | -0.15729900 |
| C | -6.23642100 | 3.50830400  | -3.35304900 |
| H | -6.27432100 | 4.43919900  | -3.92986400 |
| H | -7.21517600 | 3.02056700  | -3.43755700 |
| H | -5.48319100 | 2.85136500  | -3.80785200 |
| C | -4.52124000 | 4.51851100  | -1.85004500 |
| H | -3.74100700 | 3.84092100  | -2.22053100 |
| H | -4.26400500 | 4.80312400  | -0.82291400 |
| H | -4.51792400 | 5.42194600  | -2.46689200 |
| C | -7.05219200 | 2.04335900  | 1.14962000  |
| H | -6.33594600 | 2.68957600  | 1.66444800  |
| H | -6.68754700 | 1.01307500  | 1.21803600  |
| H | -8.01550600 | 2.09542200  | 1.67167100  |
| C | -8.13747400 | 1.42225800  | -0.98309600 |
| H | -8.23110300 | 1.58228800  | -2.06101800 |
| H | -9.13372600 | 1.47747400  | -0.53004600 |
| H | -7.75202900 | 0.40943800  | -0.82435200 |
| C | -6.30793500 | 11.17078700 | -2.67475200 |
| N | -4.47696900 | 11.16707500 | -4.11004300 |
| C | -6.34370000 | 12.44454200 | -3.54387500 |
| C | -4.98620500 | 12.55496200 | -4.24816100 |

|   |              |             |             |
|---|--------------|-------------|-------------|
| H | -6.56857000  | 13.34257700 | -2.95594200 |
| H | -7.13443700  | 12.34066200 | -4.29924500 |
| C | -5.94709700  | 11.47674900 | -1.21465700 |
| H | -4.96838700  | 11.96458200 | -1.13025300 |
| H | -5.90909700  | 10.54594400 | -0.63770200 |
| H | -6.70035400  | 12.13369500 | -0.75990900 |
| C | -7.66231100  | 10.46622500 | -2.71739300 |
| H | -7.66553700  | 9.56290600  | -2.10038000 |
| H | -7.91958600  | 10.18140700 | -3.74445700 |
| H | -8.44256300  | 11.14383600 | -2.34698600 |
| C | -4.04631200  | 13.56262100 | -3.58495200 |
| H | -3.95232500  | 13.40253700 | -2.50706000 |
| H | -4.43194100  | 14.57539400 | -3.74354700 |
| H | -3.05019300  | 13.50756000 | -4.03829900 |
| C | -5.13173400  | 12.94119500 | -5.71751700 |
| H | -5.84779000  | 12.29471600 | -6.23229600 |
| H | -4.16841200  | 12.88939500 | -6.23957300 |
| H | -5.49669100  | 13.97136600 | -5.78600700 |
| B | -4.82131900  | 8.89659800  | -3.04046400 |
| B | -7.36221900  | 6.08824400  | -1.52720600 |
| C | -5.17795500  | 10.35614600 | -3.28223400 |
| C | -8.90701100  | 4.23852400  | 0.19229800  |
| C | -10.13672000 | 4.12630800  | -0.47795200 |
| C | -8.82048500  | 4.81891100  | 1.46776300  |
| C | -11.29469400 | 4.48301900  | 0.21338400  |
| C | -10.00620600 | 5.15848600  | 2.11845000  |
| C | -11.23659200 | 4.96757100  | 1.51024000  |
| H | -12.25604200 | 4.40136100  | -0.28901500 |
| H | -12.15057200 | 5.23357600  | 2.03377400  |
| H | -9.95690600  | 5.60566900  | 3.10882600  |
| C | -7.49791000  | 5.20933900  | 2.10430700  |
| C | -7.33428000  | 4.64002700  | 3.51407800  |
| H | -7.45821100  | 3.55320000  | 3.54412000  |
| H | -8.07467200  | 5.07509700  | 4.19619500  |

|   |              |             |             |
|---|--------------|-------------|-------------|
| H | -6.34484800  | 4.88476000  | 3.91590700  |
| C | -7.38830600  | 6.73784400  | 2.14924500  |
| H | -6.68192400  | 4.84192100  | 1.46675300  |
| H | -6.41307400  | 7.04163500  | 2.54724700  |
| H | -8.16360600  | 7.15984800  | 2.80168200  |
| H | -7.50803100  | 7.17662900  | 1.15332700  |
| C | -10.24741400 | 3.76133800  | -1.94890000 |
| C | -11.23587300 | 2.62345100  | -2.20698300 |
| H | -11.23613500 | 2.35202900  | -3.26842400 |
| H | -12.25828100 | 2.92930000  | -1.95471800 |
| H | -11.00822200 | 1.72478800  | -1.62619000 |
| C | -10.66874000 | 4.99416100  | -2.75634000 |
| H | -9.25586600  | 3.46284700  | -2.30761000 |
| H | -10.73768000 | 4.74659200  | -3.82180600 |
| H | -9.95464000  | 5.81540900  | -2.63671800 |
| H | -11.65466300 | 5.35007900  | -2.43080500 |
| C | -3.27668400  | 10.74635000 | -4.76010000 |
| C | -2.04688300  | 10.85888600 | -4.09010100 |
| C | -2.17771000  | 9.82635600  | -6.68634900 |
| C | -0.94723800  | 10.01761200 | -6.07841200 |
| C | -0.88896800  | 10.50234300 | -4.78163100 |
| H | -0.03330900  | 9.75174600  | -6.60210500 |
| H | 0.07246700   | 10.58427300 | -4.27943600 |
| C | -1.93603300  | 11.22393000 | -2.61919100 |
| C | -1.51405700  | 9.99123500  | -1.81186700 |
| H | -2.22771400  | 9.16962200  | -1.93161200 |
| H | -1.44524900  | 10.23868600 | -0.74636800 |
| H | -0.52795100  | 9.63588700  | -2.13746000 |
| C | -0.94794200  | 12.36215900 | -2.36125700 |
| H | -2.92763300  | 11.52203800 | -2.26029500 |
| H | -0.94719500  | 12.63317600 | -1.29971200 |
| H | -1.17631400  | 13.26095000 | -2.94156400 |
| H | 0.07445200   | 12.05683300 | -2.61422500 |
| C | -3.36336500  | 10.16578700 | -6.03547100 |

|   |             |             |             |
|---|-------------|-------------|-------------|
| C | -4.68600100 | 9.77526800  | -6.67181400 |
| C | -4.79543100 | 8.24679500  | -6.71719400 |
| H | -5.77086400 | 7.94307800  | -7.11476700 |
| H | -4.67511900 | 7.80768700  | -5.72148600 |
| H | -4.02046300 | 7.82509700  | -7.37022300 |
| C | -4.84988000 | 10.34498500 | -8.08140300 |
| H | -5.50193100 | 10.14240900 | -6.03400700 |
| H | -4.72591600 | 11.43182500 | -8.11111000 |
| H | -5.83936700 | 10.10038500 | -8.48318000 |
| H | -4.10956100 | 9.91013100  | -8.76373800 |
| H | -2.22711700 | 9.37906800  | -7.67667400 |
| H | -8.36519500 | 6.49620800  | -1.00000500 |
| H | -3.81832700 | 8.48864400  | -3.56764500 |

**28. CAAC\_Full\_CH<sub>3</sub>\_H** (twisted)-triplet:

|   |             |            |             |
|---|-------------|------------|-------------|
| C | -5.87780500 | 3.81045500 | -1.89764800 |
| N | -7.71000600 | 3.81338500 | -0.46382700 |
| C | -5.84196400 | 2.53676700 | -1.02837200 |
| C | -7.19946500 | 2.42640700 | -0.32363700 |
| H | -5.05099500 | 2.64063600 | -0.27323700 |
| H | -5.61730900 | 1.63861500 | -1.61624700 |
| C | -7.00690200 | 4.62554200 | -1.28957800 |

|   |             |             |             |
|---|-------------|-------------|-------------|
| C | -6.60417200 | 7.09151100  | -2.46772400 |
| C | -5.57927400 | 7.89337100  | -2.09992600 |
| C | -7.29925600 | 7.30660700  | -3.79544500 |
| H | -7.35010300 | 6.38269100  | -4.39019300 |
| H | -6.81399500 | 8.08038200  | -4.41094100 |
| H | -8.34645700 | 7.61425400  | -3.63907100 |
| C | -4.88423600 | 7.67827300  | -0.77218700 |
| H | -4.83361600 | 8.60213200  | -0.17733300 |
| H | -3.83697100 | 7.37082400  | -0.92851000 |
| H | -5.36941400 | 6.90435600  | -0.15681700 |
| C | -6.24094100 | 3.50471300  | -3.35716900 |
| H | -6.28162500 | 4.43595800  | -3.93351200 |
| H | -7.21929100 | 3.01573500  | -3.43952300 |
| H | -5.48793400 | 2.84912600  | -3.81434400 |
| C | -4.52338200 | 4.51479700  | -1.85656100 |
| H | -3.74357800 | 3.83778000  | -2.22896100 |
| H | -4.26418000 | 4.79854200  | -0.82967500 |
| H | -4.52118300 | 5.41876500  | -2.47269600 |
| C | -7.05328100 | 2.04345900  | 1.14666400  |
| H | -6.33740400 | 2.69151900  | 1.65971800  |
| H | -6.68784900 | 1.01362600  | 1.21765400  |
| H | -8.01648500 | 2.09625500  | 1.66889400  |
| C | -8.13806100 | 1.41597200  | -0.98451100 |
| H | -8.23071500 | 1.57225300  | -2.06307400 |
| H | -9.13478300 | 1.47200200  | -0.53260100 |
| H | -7.75209200 | 0.40394100  | -0.82202700 |
| C | -6.30577500 | 11.17438000 | -2.67002200 |
| N | -4.47359300 | 11.17149300 | -4.10385500 |
| C | -6.34178200 | 12.44793200 | -3.53948000 |
| C | -4.98429700 | 12.55837700 | -4.24423100 |
| H | -6.56659600 | 13.34614100 | -2.95175400 |
| H | -7.13271900 | 12.34381500 | -4.29461900 |
| C | -5.94259800 | 11.48035500 | -1.21055700 |
| H | -4.96430300 | 11.96945000 | -1.12829200 |

|   |              |             |             |
|---|--------------|-------------|-------------|
| H | -5.90179600  | 10.54919600 | -0.63408400 |
| H | -6.69565500  | 12.13592500 | -0.75343900 |
| C | -7.66014500  | 10.46993300 | -2.71094000 |
| H | -7.66226100  | 9.56607300  | -2.09464900 |
| H | -7.91936000  | 10.18599400 | -3.73777000 |
| H | -8.43998200  | 11.14696100 | -2.33863200 |
| C | -4.04578600  | 13.56898200 | -3.58350300 |
| H | -3.95287200  | 13.41265900 | -2.50496200 |
| H | -4.43197700  | 14.58094600 | -3.74587500 |
| H | -3.04914900  | 13.51315200 | -4.03561700 |
| C | -5.13057800  | 12.94110500 | -5.71458500 |
| H | -5.84627800  | 12.29277600 | -6.22755700 |
| H | -4.16736800  | 12.88851900 | -6.23682100 |
| H | -5.49630000  | 13.97082900 | -5.78569000 |
| B | -4.82097100  | 8.90024300  | -3.03672500 |
| B | -7.36250200  | 6.08462900  | -1.53096200 |
| C | -5.17664200  | 10.35932200 | -3.27808600 |
| C | -8.90873200  | 4.23636800  | 0.18708700  |
| C | -10.13968600 | 4.12210000  | -0.48044900 |
| C | -8.81937700  | 4.82315500  | 1.45943200  |
| C | -11.29614800 | 4.48348500  | 0.21094800  |
| C | -10.00364000 | 5.16721300  | 2.11044700  |
| C | -11.23526100 | 4.97458200  | 1.50523700  |
| H | -12.25844500 | 4.40037500  | -0.28940600 |
| H | -12.14804300 | 5.24427900  | 2.02897800  |
| H | -9.95226000  | 5.61919100  | 3.09854600  |
| C | -7.49522000  | 5.21475500  | 2.09193700  |
| C | -7.33044800  | 4.65182200  | 3.50409100  |
| H | -7.45653200  | 3.56534300  | 3.53897400  |
| H | -8.06892600  | 5.09133200  | 4.18543100  |
| H | -6.33987700  | 4.89630600  | 3.90325400  |
| C | -7.38277800  | 6.74323900  | 2.12866400  |
| H | -6.68081400  | 4.84261600  | 1.45511300  |
| H | -6.40700400  | 7.04752700  | 2.52499200  |

|   |              |             |             |
|---|--------------|-------------|-------------|
| H | -8.15738800  | 7.17034700  | 2.77858300  |
| H | -7.50181600  | 7.17689100  | 1.13027500  |
| C | -10.25270600 | 3.74978400  | -1.94933300 |
| C | -11.24389100 | 2.61265000  | -2.20011200 |
| H | -11.24471900 | 2.33412800  | -3.25970800 |
| H | -12.26559600 | 2.92259700  | -1.94997800 |
| H | -11.01847600 | 1.71734700  | -1.61323900 |
| C | -10.67170500 | 4.97898900  | -2.76340300 |
| H | -9.26214100  | 3.44710700  | -2.30710700 |
| H | -10.74551200 | 4.72459400  | -3.82694000 |
| H | -9.95369500  | 5.79796100  | -2.65179700 |
| H | -11.65490400 | 5.34139600  | -2.43680400 |
| C | -3.27494700  | 10.74855200 | -4.75491000 |
| C | -2.04388000  | 10.86316800 | -4.08766200 |
| C | -2.18030000  | 9.81775900  | -6.67841800 |
| C | -0.94858000  | 10.01074900 | -6.07351600 |
| C | -0.88749300  | 10.50198700 | -4.77929200 |
| H | -0.03586100  | 9.74122400  | -6.59745500 |
| H | 0.07490700   | 10.58536100 | -4.27917600 |
| C | -1.93071700  | 11.23552500 | -2.61880500 |
| C | -1.51097200  | 10.00642400 | -1.80493600 |
| H | -2.22846400  | 9.18702600  | -1.91673500 |
| H | -1.43732600  | 10.26062200 | -0.74134400 |
| H | -0.52755300  | 9.64470000  | -2.13162600 |
| C | -0.93990400  | 12.37301300 | -2.36818200 |
| H | -2.92132400  | 11.53777600 | -2.26080600 |
| H | -0.93871500  | 12.65126500 | -1.30851600 |
| H | -1.16594200  | 13.26837600 | -2.95471900 |
| H | 0.08181200   | 12.06352700 | -2.61885200 |
| C | -3.36449000  | 10.16161000 | -6.02716000 |
| C | -4.68873100  | 9.76976100  | -6.65933400 |
| C | -4.80083800  | 8.24128100  | -6.69624800 |
| H | -5.77685900  | 7.93688600  | -7.09188900 |
| H | -4.68095900  | 7.80750100  | -5.69800900 |

|   |             |             |             |
|---|-------------|-------------|-------------|
| H | -4.02664000 | 7.81444500  | -7.34683300 |
| C | -4.85405200 | 10.33292200 | -8.07133600 |
| H | -5.50306300 | 10.14160700 | -6.02222000 |
| H | -4.72892700 | 11.41952400 | -8.10591700 |
| H | -5.84443900 | 10.08769900 | -8.47050600 |
| H | -4.11522800 | 9.89424600  | -8.75283700 |
| H | -2.23179200 | 9.36568200  | -7.66646600 |
| H | -8.37512600 | 6.48905800  | -1.01980700 |
| H | -3.80833700 | 8.49584000  | -3.54789600 |

**29. CAAC\_Full\_CH<sub>3</sub>\_H** (planar)-singlet:

|   |             |            |             |
|---|-------------|------------|-------------|
| C | -5.60998500 | 3.52780000 | -1.85468000 |
| N | -7.49094800 | 3.84971900 | -0.53650900 |
| C | -5.77977000 | 2.32387600 | -0.90113500 |
| C | -7.18441000 | 2.41064800 | -0.31244400 |
| H | -5.04626900 | 2.39659700 | -0.08719500 |
| H | -5.60756900 | 1.36933500 | -1.41238700 |
| C | -6.70483600 | 4.50450900 | -1.42309900 |
| C | -6.33191800 | 7.02897000 | -2.59411500 |
| C | -6.82593800 | 8.38328100 | -2.63549800 |
| C | -5.84865600 | 3.06533300 | -3.30159100 |
| H | -5.86856300 | 3.88884700 | -4.01644800 |



|   |             |             |             |
|---|-------------|-------------|-------------|
| H | -6.80798800 | 2.54274600  | -3.38608900 |
| H | -5.05937500 | 2.36396000  | -3.60129400 |
| C | -4.19767900 | 4.08744300  | -1.64915000 |
| H | -3.46421700 | 3.29377500  | -1.84419300 |
| H | -4.07629500 | 4.40749900  | -0.60785000 |
| H | -3.95639800 | 4.93701700  | -2.28484500 |
| C | -7.20071300 | 2.03712600  | 1.16741000  |
| H | -6.44044600 | 2.57957300  | 1.73476700  |
| H | -6.98513900 | 0.96723700  | 1.25796100  |
| H | -8.18271800 | 2.21985600  | 1.61889700  |
| C | -8.20623700 | 1.51651500  | -1.01922300 |
| H | -8.25527900 | 1.69326700  | -2.09634300 |
| H | -9.20375700 | 1.67686500  | -0.59504300 |
| H | -7.93748900 | 0.46710700  | -0.85785400 |
| C | -7.54843600 | 11.88403100 | -3.37460000 |
| N | -5.66737200 | 11.56283200 | -4.69281500 |
| C | -7.37921100 | 13.08795900 | -4.32823800 |
| C | -5.97454800 | 13.00174100 | -4.91699200 |
| H | -7.55174400 | 14.04246800 | -3.81704000 |
| H | -8.11273400 | 13.01490100 | -5.14213000 |
| C | -7.30964000 | 12.34692700 | -1.92784100 |
| H | -7.29007500 | 11.52380100 | -1.21255800 |
| H | -8.09870900 | 13.04869600 | -1.62849200 |
| H | -6.35015000 | 12.86924300 | -1.84353500 |
| C | -8.96044700 | 11.32357400 | -3.57979500 |
| H | -9.20056100 | 10.47310100 | -2.94485700 |
| H | -9.08225300 | 11.00451000 | -4.62134600 |
| H | -9.69443400 | 12.11643300 | -3.38342100 |
| C | -4.95302700 | 13.89639800 | -4.21041500 |
| H | -4.90378800 | 13.71982900 | -3.13327700 |
| H | -5.22221200 | 14.94567400 | -4.37190800 |
| H | -3.95547900 | 13.73639400 | -4.63466900 |
| C | -5.95851600 | 13.37514200 | -6.39688300 |
| H | -6.71858500 | 12.83231700 | -6.96414200 |

|   |              |             |             |
|---|--------------|-------------|-------------|
| H | -4.97645900  | 13.19282400 | -6.84842300 |
| H | -6.17457100  | 14.44492900 | -6.48749900 |
| B | -6.17618800  | 9.40894400  | -3.53252000 |
| B | -6.98164500  | 6.00328600  | -1.69710500 |
| C | -6.45327200  | 10.90770800 | -3.80629100 |
| C | -8.69353200  | 4.38849200  | 0.02901100  |
| C | -9.88171100  | 4.39125600  | -0.72047700 |
| C | -8.64623600  | 4.91862200  | 1.32750000  |
| C | -11.04863000 | 4.82528700  | -0.09071200 |
| C | -9.83872700  | 5.34419100  | 1.91060400  |
| C | -11.03767400 | 5.27436200  | 1.21979800  |
| H | -11.97854200 | 4.83354100  | -0.65476700 |
| H | -11.95929700 | 5.60453000  | 1.69058800  |
| H | -9.81697900  | 5.76184200  | 2.91455800  |
| C | -7.34082600  | 5.17162200  | 2.06099100  |
| C | -7.35103300  | 4.62285200  | 3.48848800  |
| H | -7.63567500  | 3.56687800  | 3.53094900  |
| H | -8.05715000  | 5.18010700  | 4.11547600  |
| H | -6.36265300  | 4.73134100  | 3.94856200  |
| C | -7.05472200  | 6.67657600  | 2.08846000  |
| H | -6.52763900  | 4.69777800  | 1.49712500  |
| H | -6.11392900  | 6.87824900  | 2.61345700  |
| H | -7.85581500  | 7.20946300  | 2.61658500  |
| H | -6.98072300  | 7.08334800  | 1.07559300  |
| C | -9.93786100  | 4.07452200  | -2.20638300 |
| C | -10.98630100 | 3.01463700  | -2.55011500 |
| H | -10.95803400 | 2.78694200  | -3.62146700 |
| H | -11.99645600 | 3.37838600  | -2.32743900 |
| H | -10.84376200 | 2.08005400  | -2.00008900 |
| C | -10.24161100 | 5.35646600  | -2.99191500 |
| H | -8.95137300  | 3.71903700  | -2.53018600 |
| H | -10.25511300 | 5.14789700  | -4.06770800 |
| H | -9.49488800  | 6.13380200  | -2.80160600 |
| H | -11.22882700 | 5.74828000  | -2.71553000 |

|   |             |             |             |
|---|-------------|-------------|-------------|
| C | -4.46459600 | 11.02449600 | -5.25833100 |
| C | -3.27644600 | 11.02217600 | -4.50880500 |
| C | -3.31899500 | 10.06913800 | -7.13984700 |
| C | -2.12010100 | 10.13939300 | -6.44899200 |
| C | -2.10935100 | 10.58851400 | -5.13849600 |
| H | -1.19834700 | 9.80952400  | -6.91973400 |
| H | -1.17946100 | 10.58059600 | -4.57440100 |
| C | -3.22048900 | 11.33902900 | -3.02292100 |
| C | -2.91642500 | 10.05721500 | -2.23730200 |
| H | -3.66289400 | 9.27964600  | -2.42767100 |
| H | -2.90310100 | 10.26581800 | -1.16151400 |
| H | -1.92906500 | 9.66568800  | -2.51357600 |
| C | -2.17240600 | 12.39926900 | -2.67920700 |
| H | -4.20710100 | 11.69425100 | -2.69921400 |
| H | -2.20078600 | 12.62702100 | -1.60787000 |
| H | -2.31525300 | 13.33376900 | -3.22929800 |
| H | -1.16212100 | 12.03585100 | -2.90183100 |
| C | -4.51166200 | 10.49430200 | -6.55680700 |
| C | -5.81693900 | 10.24082100 | -7.29036900 |
| C | -6.10243700 | 8.73575600  | -7.31797600 |
| H | -7.04314400 | 8.53376000  | -7.84300400 |
| H | -6.17628400 | 8.32886800  | -6.30514700 |
| H | -5.30112900 | 8.20323400  | -7.84614100 |
| C | -5.80689000 | 10.78968000 | -8.71783500 |
| H | -6.63033900 | 10.71429200 | -6.72649700 |
| H | -5.52264800 | 11.84576300 | -8.76024500 |
| H | -6.79521100 | 10.68083500 | -9.17795100 |
| H | -5.10053700 | 10.23272000 | -9.34482100 |
| H | -3.34055600 | 9.65145400  | -8.14379200 |
| H | -7.89561600 | 6.36452500  | -1.02307400 |
| H | -5.26206000 | 9.04787100  | -4.20642200 |
| C | -5.27799900 | 6.66034300  | -3.61461500 |
| H | -5.55780400 | 6.98548500  | -4.62175400 |
| H | -4.30592900 | 7.13247800  | -3.40939400 |

|   |             |            |             |
|---|-------------|------------|-------------|
| H | -5.11976300 | 5.58834500 | -3.66444000 |
| C | -7.87974900 | 8.75204400 | -1.61489300 |
| H | -8.85232200 | 8.28117700 | -1.82078900 |
| H | -7.60052900 | 8.42579000 | -0.60797900 |
| H | -8.03690100 | 9.82414300 | -1.56416400 |

**30. CAAC\_Full\_CH<sub>3</sub>\_H** (planar)-triplet:

|   |             |            |             |
|---|-------------|------------|-------------|
| C | -5.64157700 | 3.48752300 | -1.89760300 |
| N | -7.67505200 | 3.73729900 | -0.78767000 |
| C | -6.22749300 | 2.09982300 | -1.55512400 |
| C | -7.33041500 | 2.31730400 | -0.52332000 |
| H | -5.45877800 | 1.40454100 | -1.19720800 |
| H | -6.67149300 | 1.66265500 | -2.45993500 |
| C | -6.74885000 | 4.45937100 | -1.49061000 |
| C | -6.29529900 | 7.07325900 | -2.55705500 |
| C | -6.86279000 | 8.33933400 | -2.67226500 |
| C | -5.34258400 | 3.51861300 | -3.39986200 |
| H | -4.89643800 | 4.45299800 | -3.73802700 |
| H | -6.26725700 | 3.36380000 | -3.96767500 |
| H | -4.65145400 | 2.70329200 | -3.65206300 |
| C | -4.36521000 | 3.71982100 | -1.07187600 |
| H | -3.60526500 | 2.97584400 | -1.34506000 |

|   |             |             |             |
|---|-------------|-------------|-------------|
| H | -4.56444800 | 3.61559900  | -0.00025300 |
| H | -3.93709500 | 4.71218500  | -1.22286200 |
| C | -6.87589400 | 2.11795700  | 0.92622200  |
| H | -6.01266900 | 2.73068300  | 1.19453300  |
| H | -6.60839200 | 1.06703100  | 1.08044200  |
| H | -7.69696400 | 2.35908200  | 1.61134600  |
| C | -8.51285700 | 1.37922900  | -0.75452500 |
| H | -8.85174500 | 1.39428400  | -1.79335600 |
| H | -9.35606900 | 1.62820300  | -0.09958800 |
| H | -8.19937500 | 0.35646400  | -0.51988600 |
| C | -7.51660700 | 11.92510200 | -3.33154500 |
| N | -5.48318500 | 11.67537500 | -4.44160000 |
| C | -6.93063000 | 13.31282000 | -3.67381500 |
| C | -5.82777600 | 13.09542200 | -4.70571100 |
| H | -6.48655000 | 13.74979800 | -2.76895100 |
| H | -7.69928900 | 14.00824100 | -4.03157400 |
| C | -7.81564300 | 11.89381400 | -1.82930700 |
| H | -6.89095800 | 12.04842200 | -1.26146000 |
| H | -8.26197100 | 10.95945900 | -1.49129500 |
| H | -8.50666000 | 12.70921400 | -1.57701800 |
| C | -8.79297100 | 11.69296200 | -4.15731200 |
| H | -9.22129600 | 10.70071700 | -4.00619300 |
| H | -8.59365300 | 11.79697800 | -5.22894000 |
| H | -9.55278100 | 12.43712500 | -3.88426400 |
| C | -4.64529400 | 14.03340100 | -4.47436800 |
| H | -4.30635800 | 14.01804500 | -3.43555300 |
| H | -4.95876700 | 15.05623900 | -4.70871000 |
| H | -3.80213100 | 13.78457600 | -5.12942400 |
| C | -6.28234600 | 13.29500900 | -6.15520500 |
| H | -7.14569600 | 12.68245700 | -6.42352000 |
| H | -5.46136100 | 13.05383000 | -6.84041200 |
| H | -6.54969500 | 14.34599500 | -6.30928900 |
| B | -6.10084300 | 9.47515900  | -3.42366500 |
| B | -7.05729700 | 5.93747800  | -1.80564200 |

|   |              |             |             |
|---|--------------|-------------|-------------|
| C | -6.40935800  | 10.95326200 | -3.73866300 |
| C | -8.79862100  | 4.31407400  | -0.11565600 |
| C | -10.06345100 | 4.22455900  | -0.71733000 |
| C | -8.61998500  | 4.97819700  | 1.11030400  |
| C | -11.16744000 | 4.70576000  | -0.01467800 |
| C | -9.75539000  | 5.44089700  | 1.77564800  |
| C | -11.02184700 | 5.28636800  | 1.23477700  |
| H | -12.15288200 | 4.64579100  | -0.47119200 |
| H | -11.89252900 | 5.65113000  | 1.77233500  |
| H | -9.63549100  | 5.95532400  | 2.72653300  |
| C | -7.25481600  | 5.32681200  | 1.68053700  |
| C | -7.08203700  | 4.86670900  | 3.12912200  |
| H | -7.25414000  | 3.79370800  | 3.25485000  |
| H | -7.77750700  | 5.39339500  | 3.79340800  |
| H | -6.06966600  | 5.09305000  | 3.48181700  |
| C | -7.03623500  | 6.84295600  | 1.60074400  |
| H | -6.48320600  | 4.85212200  | 1.06203400  |
| H | -6.04472700  | 7.10554000  | 1.98674100  |
| H | -7.78189400  | 7.36907900  | 2.21045000  |
| H | -7.11376500  | 7.21316400  | 0.57253600  |
| C | -10.25107900 | 3.75510300  | -2.14897900 |
| C | -11.34708900 | 2.69798600  | -2.28612500 |
| H | -11.38674600 | 2.31646300  | -3.31243300 |
| H | -12.33265300 | 3.12553900  | -2.06649000 |
| H | -11.19784500 | 1.85005200  | -1.61035500 |
| C | -10.57625500 | 4.95786700  | -3.03993700 |
| H | -9.30010600  | 3.33874000  | -2.50281200 |
| H | -10.71386900 | 4.64096800  | -4.08015100 |
| H | -9.77329100  | 5.70079300  | -3.00831600 |
| H | -11.50377700 | 5.44271500  | -2.70943300 |
| C | -4.35970900  | 11.09864200 | -5.11381600 |
| C | -3.09477200  | 11.18807700 | -4.51233900 |
| C | -3.40322300  | 9.97212800  | -7.00546100 |
| C | -2.13667600  | 10.12663600 | -6.46480200 |

|   |             |             |             |
|---|-------------|-------------|-------------|
| C | -1.99089200 | 10.70703900 | -5.21527300 |
| H | -1.26607300 | 9.76200200  | -7.00257400 |
| H | -1.00537400 | 10.76696400 | -4.75891800 |
| C | -2.90687900 | 11.65722000 | -3.08061900 |
| C | -2.58120800 | 10.45429200 | -2.19006000 |
| H | -3.38389100 | 9.71107900  | -2.22185100 |
| H | -2.44360700 | 10.77091800 | -1.14976100 |
| H | -1.65353700 | 9.96988900  | -2.52079700 |
| C | -1.81100100 | 12.71448000 | -2.94345700 |
| H | -3.85784900 | 12.07331200 | -2.72644400 |
| H | -1.77116800 | 13.09574600 | -1.91706000 |
| H | -1.96049800 | 13.56256500 | -3.61897500 |
| H | -0.82543000 | 12.28711300 | -3.16341800 |
| C | -4.53852600 | 10.43468500 | -6.33984300 |
| C | -5.90377900 | 10.08607900 | -6.90987100 |
| C | -6.12225400 | 8.56991700  | -6.83011800 |
| H | -7.11385000 | 8.30728900  | -7.21585900 |
| H | -6.04440600 | 8.19964800  | -5.80195200 |
| H | -5.37672200 | 8.04388500  | -7.44005800 |
| C | -6.07684700 | 10.54627400 | -8.35839000 |
| H | -6.67529700 | 10.56070000 | -6.29120400 |
| H | -5.90481300 | 11.61929300 | -8.48406900 |
| H | -7.08927600 | 10.31991800 | -8.71090800 |
| H | -5.38148600 | 10.01966600 | -9.02285100 |
| H | -3.52327600 | 9.45783500  | -7.95640000 |
| H | -8.10848600 | 6.24235100  | -1.33799100 |
| H | -5.04954500 | 9.17043600  | -3.89118100 |
| C | -4.84810800 | 6.88156600  | -2.96819700 |
| H | -4.72430900 | 6.81490900  | -4.05958300 |
| H | -4.20576600 | 7.70134700  | -2.63827800 |
| H | -4.43547800 | 5.97147300  | -2.54083800 |
| C | -8.31000700 | 8.53094100  | -2.26115500 |
| H | -8.95228300 | 7.71109900  | -2.59102600 |
| H | -8.43384600 | 8.59764700  | -1.16977300 |

H -8.72268500 9.44098700 -2.68857700

**31. CAAC\_Full\_H\_H (fully optimized)-singlet:**

C -5.66987200 3.88555200 -1.76743700  
N -7.56027700 3.93962100 -0.42291800  
C -5.74621200 2.57919900 -0.94881400  
C -7.14827700 2.51137300 -0.33783200  
H -5.00300800 2.61571000 -0.14058700  
H -5.52494900 1.69530000 -1.55868300  
C -6.79013900 4.73371100 -1.18418300  
C -6.40746600 7.04224900 -2.46165600  
C -6.74561400 8.37318100 -2.75989900  
C -5.95002200 3.62906400 -3.25656000  
H -5.92850900 4.56276100 -3.82462500  
H -6.93413300 3.17208200 -3.41011700  
H -5.19222000 2.94905000 -3.66738800  
C -4.28792400 4.51987800 -1.60252300  
H -3.51568200 3.80172400 -1.90771000  
H -4.10815100 4.78922800 -0.55573400  
H -4.17384600 5.42204800 -2.20574800  
C -7.12537200 2.01422200 1.10437900  
H -6.39826700 2.55902300 1.71213900



|   |             |             |             |
|---|-------------|-------------|-------------|
| H | -6.84323500 | 0.95617600  | 1.11045700  |
| H | -8.11439600 | 2.09994100  | 1.57018900  |
| C | -8.11470800 | 1.62146300  | -1.12088800 |
| H | -8.15788400 | 1.87525500  | -2.18319100 |
| H | -9.12359800 | 1.70111200  | -0.70046400 |
| H | -7.79603300 | 0.57745400  | -1.03346200 |
| C | -7.48320000 | 11.52992600 | -3.45385000 |
| N | -5.59276800 | 11.47595600 | -4.79833000 |
| C | -7.40693000 | 12.83624400 | -4.27253500 |
| C | -6.00484000 | 12.90417100 | -4.88344600 |
| H | -7.62833700 | 13.72016200 | -3.66274500 |
| H | -8.15008200 | 12.79958400 | -5.08080700 |
| C | -7.20290300 | 11.78643000 | -1.96476000 |
| H | -7.22447000 | 10.85274600 | -1.39667300 |
| H | -7.96059800 | 12.46653200 | -1.55388100 |
| H | -6.21872900 | 12.24329800 | -1.81129900 |
| C | -8.86517600 | 10.89562400 | -3.61862900 |
| H | -8.97925200 | 9.99350200  | -3.01533500 |
| H | -9.04503800 | 10.62621200 | -4.66538200 |
| H | -9.63737200 | 11.61382700 | -3.31343800 |
| C | -5.03847300 | 13.79412700 | -4.10034600 |
| H | -4.99547100 | 13.54046100 | -3.03800900 |
| H | -5.35704800 | 14.83815100 | -4.18794800 |
| H | -4.02952200 | 13.71434800 | -4.52061800 |
| C | -6.02770200 | 13.40135900 | -6.32565900 |
| H | -6.75483900 | 12.85666100 | -6.93347200 |
| H | -5.03867500 | 13.31559500 | -6.79145200 |
| H | -6.30974400 | 14.45943100 | -6.33168900 |
| B | -6.06259300 | 9.19614400  | -3.80169000 |
| B | -7.09048900 | 6.21932900  | -1.41983400 |
| C | -6.36295800 | 10.68177900 | -4.03720300 |
| C | -8.78463100 | 4.38340300  | 0.17414700  |
| C | -9.96272000 | 4.40479000  | -0.59141400 |
| C | -8.76763800 | 4.82884300  | 1.50516400  |

|   |              |             |             |
|---|--------------|-------------|-------------|
| C | -11.14965600 | 4.76211700  | 0.04903900  |
| C | -9.98008200  | 5.17877400  | 2.09810000  |
| C | -11.16755800 | 5.12063200  | 1.38695100  |
| H | -12.07240300 | 4.78180900  | -0.52630800 |
| H | -12.10431200 | 5.39111800  | 1.86599300  |
| H | -9.98355900  | 5.52769800  | 3.12821400  |
| C | -7.48158600  | 5.06990300  | 2.27529600  |
| C | -7.47969000  | 4.39056600  | 3.64525200  |
| H | -7.69338600  | 3.31898400  | 3.58290300  |
| H | -8.23269800  | 4.83939100  | 4.30391100  |
| H | -6.50857800  | 4.51903300  | 4.13600200  |
| C | -7.26539900  | 6.57762200  | 2.44339000  |
| H | -6.64339900  | 4.68536300  | 1.68162600  |
| H | -6.32731200  | 6.77275600  | 2.97543200  |
| H | -8.08131500  | 7.01804600  | 3.03062200  |
| H | -7.22938000  | 7.08447800  | 1.47497100  |
| C | -9.99231700  | 4.17809100  | -2.09408100 |
| C | -10.99485000 | 3.10068900  | -2.51165800 |
| H | -10.94833600 | 2.93845000  | -3.59420300 |
| H | -12.02033600 | 3.41123600  | -2.27845400 |
| H | -10.82037000 | 2.14117500  | -2.01632400 |
| C | -10.33592300 | 5.49262200  | -2.80466500 |
| H | -8.98995200  | 3.88113800  | -2.42511700 |
| H | -10.32620500 | 5.34980100  | -3.89103800 |
| H | -9.62349600  | 6.28412900  | -2.55501300 |
| H | -11.34143900 | 5.82887700  | -2.52109400 |
| C | -4.36849000  | 11.03218800 | -5.39554500 |
| C | -3.19031000  | 11.01082000 | -4.63015700 |
| C | -3.17336800  | 10.23659600 | -7.31960700 |
| C | -1.98578900  | 10.29469900 | -6.60861900 |
| C | -2.00348400  | 10.65334500 | -5.27073600 |
| H | -1.04912100  | 10.02408700 | -7.08775600 |
| H | -1.08065900  | 10.63365100 | -4.69551800 |
| C | -3.16057500  | 11.23768400 | -3.12752200 |

|   |             |             |             |
|---|-------------|-------------|-------------|
| C | -2.81699300 | 9.92321100  | -2.41682900 |
| H | -3.52937900 | 9.13166700  | -2.66648200 |
| H | -2.82678900 | 10.06610000 | -1.33046700 |
| H | -1.81144500 | 9.58696600  | -2.70030700 |
| C | -2.15793400 | 12.31505900 | -2.71014400 |
| H | -4.16290000 | 11.53473900 | -2.79645100 |
| H | -2.20431900 | 12.47738500 | -1.62760700 |
| H | -2.33240200 | 13.27454800 | -3.20553300 |
| H | -1.13249800 | 12.00441900 | -2.94343300 |
| C | -4.38569800 | 10.58664900 | -6.72651700 |
| C | -5.67187400 | 10.34573800 | -7.49646600 |
| C | -5.88822400 | 8.83806900  | -7.66474800 |
| H | -6.82623400 | 8.64317100  | -8.19703100 |
| H | -5.92454100 | 8.33110700  | -6.69639400 |
| H | -5.07225800 | 8.39758100  | -8.25185500 |
| C | -5.67399300 | 11.02514700 | -8.86636200 |
| H | -6.50997400 | 10.73024100 | -6.90265900 |
| H | -5.45980800 | 12.09663500 | -8.80406600 |
| H | -6.64537600 | 10.89709200 | -9.35669900 |
| H | -4.92145300 | 10.57599300 | -9.52533700 |
| H | -3.17007600 | 9.88759000  | -8.34969700 |
| H | -7.98052200 | 6.71389200  | -0.77759700 |
| H | -5.17256300 | 8.70162600  | -4.44397600 |
| H | -5.61493700 | 6.64293800  | -3.10762800 |
| H | -7.53813400 | 8.77248800  | -2.11391500 |

**32. CAAC\_Full\_H\_H (fully optimized)-triplet:**

|   |             |            |             |
|---|-------------|------------|-------------|
| C | -5.70092700 | 3.84271200 | -1.76918900 |
| N | -7.57715600 | 3.91285000 | -0.39071400 |
| C | -5.76992700 | 2.54690000 | -0.93354400 |
| C | -7.16636300 | 2.48781800 | -0.30418100 |
| H | -5.01772100 | 2.59295000 | -0.13417300 |
| H | -5.55728500 | 1.65375900 | -1.53329000 |
| C | -6.80621200 | 4.70053200 | -1.17932600 |
| C | -6.41550900 | 7.05221000 | -2.50439100 |
| C | -6.73802500 | 8.36317900 | -2.71785500 |
| C | -5.99729400 | 3.57785500 | -3.25273300 |
| H | -6.01018100 | 4.51463300 | -3.81879200 |
| H | -6.97148000 | 3.09559500 | -3.39050300 |
| H | -5.22938200 | 2.92232100 | -3.68459900 |
| C | -4.31963500 | 4.48425700 | -1.62907800 |
| H | -3.54473900 | 3.78233800 | -1.96349300 |
| H | -4.11812900 | 4.74238800 | -0.58323200 |
| H | -4.22934900 | 5.39577900 | -2.22437000 |
| C | -7.12758600 | 1.99941000 | 1.14114100  |
| H | -6.39439900 | 2.54896600 | 1.73750500  |
| H | -6.84790900 | 0.94073900 | 1.15475500  |
| H | -8.11227900 | 2.09174200 | 1.61526700  |
| C | -8.14038700 | 1.58940900 | -1.06996200 |
| H | -8.18715000 | 1.82704400 | -2.13582400 |

|   |              |             |             |
|---|--------------|-------------|-------------|
| H | -9.14756700  | 1.68022700  | -0.64697400 |
| H | -7.82688700  | 0.54489200  | -0.96892200 |
| C | -7.45265700  | 11.57261200 | -3.45296200 |
| N | -5.57602700  | 11.50283900 | -4.83091400 |
| C | -7.38348100  | 12.86854200 | -4.28840300 |
| C | -5.98676000  | 12.92791400 | -4.91706500 |
| H | -7.59664700  | 13.76158800 | -3.68870500 |
| H | -8.13524200  | 12.82236600 | -5.08818900 |
| C | -7.15679600  | 11.83723100 | -1.96926700 |
| H | -7.14437400  | 10.90038900 | -1.40331100 |
| H | -7.92472000  | 12.49289800 | -1.53762600 |
| H | -6.18254500  | 12.31921500 | -1.83101900 |
| C | -8.83386900  | 10.93101400 | -3.59362300 |
| H | -8.92429600  | 10.01939400 | -2.99849700 |
| H | -9.03499700  | 10.67302700 | -4.63957800 |
| H | -9.60892000  | 11.63283600 | -3.25936200 |
| C | -5.01311400  | 13.82604800 | -4.15047500 |
| H | -4.96670300  | 13.58787400 | -3.08472400 |
| H | -5.32674300  | 14.87056600 | -4.25109100 |
| H | -4.00576000  | 13.73561700 | -4.57315000 |
| C | -6.02481700  | 13.41689400 | -6.36221500 |
| H | -6.75820000  | 12.86801800 | -6.95895900 |
| H | -5.04006900  | 13.32415700 | -6.83616900 |
| H | -6.30389600  | 14.47572400 | -6.37553800 |
| B | -6.05565700  | 9.23815700  | -3.79020000 |
| B | -7.09777600  | 6.17728400  | -1.43194500 |
| C | -6.34715800  | 10.71495200 | -4.04268000 |
| C | -8.79828300  | 4.36939000  | 0.19517500  |
| C | -9.97230300  | 4.40053600  | -0.57753400 |
| C | -8.78618300  | 4.82979100  | 1.52156700  |
| C | -11.15839900 | 4.78311100  | 0.04937100  |
| C | -9.99762300  | 5.20239700  | 2.10316200  |
| C | -11.18060100 | 5.15544100  | 1.38382500  |
| H | -12.07709600 | 4.80908600  | -0.53236100 |

|   |              |             |             |
|---|--------------|-------------|-------------|
| H | -12.11673000 | 5.44436200  | 1.85327900  |
| H | -10.00349600 | 5.56058700  | 3.13023300  |
| C | -7.50088500  | 5.06303800  | 2.29484400  |
| C | -7.50847100  | 4.39222700  | 3.66866700  |
| H | -7.72316400  | 3.32066000  | 3.61044700  |
| H | -8.26515400  | 4.84565000  | 4.32008600  |
| H | -6.54016500  | 4.52151300  | 4.16483000  |
| C | -7.27130200  | 6.56960600  | 2.45381000  |
| H | -6.66608200  | 4.66727500  | 1.70414700  |
| H | -6.33156000  | 6.76108000  | 2.98427800  |
| H | -8.08338000  | 7.02265500  | 3.03673700  |
| H | -7.23102800  | 7.07014800  | 1.48197700  |
| C | -9.99352800  | 4.14808600  | -2.07590700 |
| C | -11.01420500 | 3.08374900  | -2.48202100 |
| H | -10.95817600 | 2.89482200  | -3.55981800 |
| H | -12.03589500 | 3.41987800  | -2.26842100 |
| H | -10.86417000 | 2.13320300  | -1.96172600 |
| C | -10.29980000 | 5.45545900  | -2.81554400 |
| H | -8.99497300  | 3.82245200  | -2.38972000 |
| H | -10.29572200 | 5.28959400  | -3.89874300 |
| H | -9.56603200  | 6.23401800  | -2.58432800 |
| H | -11.29371900 | 5.82945400  | -2.53846800 |
| C | -4.35471700  | 11.04639000 | -5.41650700 |
| C | -3.18100500  | 11.01497800 | -4.64332500 |
| C | -3.15464100  | 10.21395600 | -7.32423400 |
| C | -1.97194900  | 10.26068700 | -6.60441500 |
| C | -1.99466200  | 10.63256100 | -5.26985000 |
| H | -1.03564600  | 9.97191800  | -7.07361600 |
| H | -1.07620300  | 10.60634300 | -4.68775500 |
| C | -3.16043100  | 11.26692100 | -3.14485900 |
| C | -2.85455600  | 9.95929000  | -2.40551200 |
| H | -3.58836100  | 9.18090200  | -2.63718600 |
| H | -2.85894100  | 10.12484100 | -1.32226600 |
| H | -1.86060400  | 9.58524400  | -2.68240100 |

|   |             |             |             |
|---|-------------|-------------|-------------|
| C | -2.13989000 | 12.33109100 | -2.73793300 |
| H | -4.15909600 | 11.59248900 | -2.83134300 |
| H | -2.19648100 | 12.51978300 | -1.66012600 |
| H | -2.28956100 | 13.28176400 | -3.25811000 |
| H | -1.11811200 | 11.99493800 | -2.95105200 |
| C | -4.36634300 | 10.58635200 | -6.74302900 |
| C | -5.65138000 | 10.35316000 | -7.51682800 |
| C | -5.88102300 | 8.84659600  | -7.67554800 |
| H | -6.82094000 | 8.65502800  | -8.20565100 |
| H | -5.92097200 | 8.34622600  | -6.70361000 |
| H | -5.06914700 | 8.39343800  | -8.25866800 |
| C | -5.64306200 | 11.02395800 | -8.89064800 |
| H | -6.48633500 | 10.74910900 | -6.92644800 |
| H | -5.42856000 | 12.09553500 | -8.83228800 |
| H | -6.61104700 | 10.89463800 | -9.38740500 |
| H | -4.88596000 | 10.57064600 | -9.54165500 |
| H | -3.14827600 | 9.85608200  | -8.35140100 |
| H | -7.96477600 | 6.69375600  | -0.77947100 |
| H | -5.18862000 | 8.72169600  | -4.44262100 |
| H | -5.65075600 | 6.65707300  | -3.18612000 |
| H | -7.50276900 | 8.75831200  | -2.03611800 |

**33. CAAC\_Full\_H\_H (twisted)-singlet:**

|   |             |             |             |
|---|-------------|-------------|-------------|
| C | -5.94134400 | 3.83266000  | -1.84238900 |
| N | -7.88958100 | 3.79851600  | -0.56874800 |
| C | -5.94254900 | 2.57568400  | -0.94862900 |
| C | -7.35322400 | 2.42788200  | -0.36824700 |
| H | -5.22913300 | 2.72354500  | -0.12619200 |
| H | -5.63093300 | 1.67706000  | -1.49471700 |
| C | -7.14322000 | 4.61885000  | -1.34767000 |
| C | -6.68262700 | 7.01621400  | -2.57443500 |
| C | -5.71412400 | 7.85942400  | -2.17031100 |
| C | -6.16669300 | 3.49801600  | -3.32331800 |
| H | -6.21587500 | 4.42369100  | -3.90938400 |
| H | -7.10501000 | 2.95193700  | -3.47900800 |
| H | -5.34274100 | 2.88534400  | -3.71244900 |
| C | -4.61368200 | 4.57649200  | -1.69342900 |
| H | -3.78253400 | 3.88254200  | -1.87621900 |
| H | -4.50588800 | 4.97972700  | -0.67875200 |
| H | -4.53208200 | 5.40743100  | -2.39681600 |
| C | -7.33141000 | 2.04902800  | 1.11085200  |
| H | -6.67068700 | 2.70244300  | 1.68670900  |
| H | -6.96251100 | 1.02316200  | 1.21361400  |
| H | -8.33729900 | 2.08952200  | 1.54655200  |
| C | -8.20132600 | 1.38921500  | -1.10357900 |
| H | -8.21870900 | 1.54956200  | -2.18512200 |
| H | -9.23033600 | 1.40765400  | -0.72762100 |
| H | -7.79362800 | 0.39017200  | -0.91585300 |
| C | -6.45618300 | 11.04241400 | -2.90328300 |
| N | -4.51080600 | 11.07518300 | -4.18117100 |



|   |              |             |             |
|---|--------------|-------------|-------------|
| C | -6.45703500  | 12.29844200 | -3.79835800 |
| C | -5.04781200  | 12.44543100 | -4.38251400 |
| H | -6.76715200  | 13.19768300 | -3.25242800 |
| H | -7.17256700  | 12.14979800 | -4.61882200 |
| C | -6.22646400  | 11.37860100 | -1.42337900 |
| H | -6.17648000  | 10.45358400 | -0.83635100 |
| H | -7.04870200  | 11.99255000 | -1.03263400 |
| H | -5.28711300  | 11.92389000 | -1.27105600 |
| C | -7.78442600  | 10.29879700 | -3.04790500 |
| H | -7.86442100  | 9.46860300  | -2.34345400 |
| H | -7.89493000  | 9.89447600  | -4.06187400 |
| H | -8.61492200  | 10.99315700 | -2.86372300 |
| C | -4.19792400  | 13.48524800 | -3.65092300 |
| H | -4.17793900  | 13.32654200 | -2.56918300 |
| H | -4.60603400  | 14.48401700 | -3.83920900 |
| H | -3.16983900  | 13.46614900 | -4.02933500 |
| C | -5.07350700  | 12.82196900 | -5.86216100 |
| H | -5.73593300  | 12.16777800 | -6.43515300 |
| H | -4.06884400  | 12.78060400 | -6.30059400 |
| H | -5.44254900  | 13.84772300 | -5.96552200 |
| B | -4.87142800  | 8.82191700  | -3.06745600 |
| B | -7.52666100  | 6.05286000  | -1.67950300 |
| C | -5.25581600  | 10.25543300 | -3.40038300 |
| C | -9.14167400  | 4.19924700  | -0.01043500 |
| C | -10.32193800 | 4.04402700  | -0.75684900 |
| C | -9.15347200  | 4.80099100  | 1.25805400  |
| C | -11.53052400 | 4.38798000  | -0.15045500 |
| C | -10.38595900 | 5.13395700  | 1.81869700  |
| C | -11.56890500 | 4.90523800  | 1.13408700  |
| H | -12.45467000 | 4.27142500  | -0.71227800 |
| H | -12.52085500 | 5.16450000  | 1.58881400  |
| H | -10.41200200 | 5.60151100  | 2.80047000  |
| C | -7.88340000  | 5.20318600  | 1.98674600  |
| C | -7.84311100  | 4.67419300  | 3.42075600  |

|   |              |             |             |
|---|--------------|-------------|-------------|
| H | -7.99782400  | 3.59148900  | 3.46852000  |
| H | -8.61969600  | 5.14591100  | 4.03453400  |
| H | -6.87999400  | 4.90503300  | 3.88929600  |
| C | -7.75309500  | 6.72972200  | 1.98796800  |
| H | -7.02376100  | 4.80515800  | 1.43342600  |
| H | -6.83478500  | 7.03585500  | 2.50194400  |
| H | -8.60076100  | 7.18897100  | 2.51266000  |
| H | -7.72929400  | 7.12807700  | 0.96792800  |
| C | -10.33139200 | 3.64918200  | -2.22395200 |
| C | -11.25715300 | 2.46786000  | -2.51788100 |
| H | -11.19263300 | 2.18682300  | -3.57488100 |
| H | -12.30239500 | 2.73492300  | -2.32086500 |
| H | -11.02462100 | 1.58445300  | -1.91657300 |
| C | -10.76078800 | 4.84989400  | -3.07449100 |
| H | -9.30824200  | 3.38844200  | -2.51952500 |
| H | -10.73707300 | 4.59174800  | -4.13931000 |
| H | -10.10770800 | 5.71160000  | -2.91006200 |
| H | -11.78707500 | 5.14922600  | -2.82651900 |
| C | -3.26161000  | 10.67251400 | -4.74447500 |
| C | -2.07773000  | 10.82902700 | -4.00419500 |
| C | -2.02679600  | 9.73199500  | -6.57699800 |
| C | -0.84042000  | 9.96183100  | -5.89869700 |
| C | -0.87225400  | 10.48267700 | -4.61543900 |
| H | 0.10916600   | 9.70069700  | -6.35728100 |
| H | 0.05465600   | 10.60015300 | -4.05837900 |
| C | -2.06127500  | 11.22746100 | -2.53814500 |
| C | -1.62918300  | 10.02837900 | -1.68668300 |
| H | -2.28383300  | 9.16693600  | -1.84613700 |
| H | -1.64782300  | 10.28906800 | -0.62238200 |
| H | -0.60432400  | 9.72746700  | -1.93861500 |
| C | -1.13307900  | 12.40861100 | -2.25131600 |
| H | -3.08286700  | 11.48989000 | -2.23865100 |
| H | -1.19281300  | 12.69262300 | -1.19483400 |
| H | -1.36720700  | 13.29061800 | -2.85407300 |

|   |             |             |             |
|---|-------------|-------------|-------------|
| H | -0.08895500 | 12.13991700 | -2.45202400 |
| C | -3.25636500 | 10.06729600 | -6.01139200 |
| C | -4.53014100 | 9.66434600  | -6.73321300 |
| C | -4.66197300 | 8.13793900  | -6.73021000 |
| H | -5.58270500 | 7.83155700  | -7.23968800 |
| H | -4.68204500 | 7.74200400  | -5.70912800 |
| H | -3.81693900 | 7.67655200  | -7.25726700 |
| C | -4.57635700 | 10.18990100 | -8.16833100 |
| H | -5.38696700 | 10.06450600 | -6.17702500 |
| H | -4.42039700 | 11.27228200 | -8.21943400 |
| H | -5.54191300 | 9.95919900  | -8.63188900 |
| H | -3.80320800 | 9.71567300  | -8.78450700 |
| H | -2.00574800 | 9.26175800  | -7.55760800 |
| H | -8.58389500 | 6.44814500  | -1.26312300 |
| H | -3.81477800 | 8.42631200  | -3.48498800 |
| H | -7.00327300 | 7.13620000  | -3.62594600 |
| H | -5.39306200 | 7.73994400  | -1.11898400 |

**34. CAAC\_Full\_H\_H (twisted)-triplet:**

|   |             |             |             |
|---|-------------|-------------|-------------|
| C | -5.93896200 | 3.83482600  | -1.83950300 |
| N | -7.88674700 | 3.80117600  | -0.56474300 |
| C | -5.94064800 | 2.57767000  | -0.94594200 |
| C | -7.35154100 | 2.42985600  | -0.36624800 |
| H | -5.22766900 | 2.72537400  | -0.12309000 |
| H | -5.62876400 | 1.67912400  | -1.49200200 |
| C | -7.14134900 | 4.62088000  | -1.34561600 |
| C | -6.68296800 | 7.01551300  | -2.57825000 |
| C | -5.71586200 | 7.85886700  | -2.16966700 |
| C | -6.16242500 | 3.50074500  | -3.32080200 |
| H | -6.21127600 | 4.42669800  | -3.90645300 |
| H | -7.10029800 | 2.95435800  | -3.47797400 |
| H | -5.33769800 | 2.88870300  | -3.70931200 |
| C | -4.61144100 | 4.57871800  | -1.68877800 |
| H | -3.78004000 | 3.88472000  | -1.87027900 |
| H | -4.50496700 | 4.98196500  | -0.67396100 |
| H | -4.52881000 | 5.40959100  | -2.39211600 |
| C | -7.33074700 | 2.04810300  | 1.11210800  |
| H | -6.66926400 | 2.69929400  | 1.68959900  |
| H | -6.96349100 | 1.02146400  | 1.21294800  |
| H | -8.33674300 | 2.08921700  | 1.54750500  |
| C | -8.20016600 | 1.39318500  | -1.10387700 |
| H | -8.21740400 | 1.55586700  | -2.18506500 |
| H | -9.22920500 | 1.41148200  | -0.72796600 |
| H | -7.79309900 | 0.39348300  | -0.91826500 |
| C | -6.46029800 | 11.03923100 | -2.90889800 |
| N | -4.51423000 | 11.07205500 | -4.18621300 |
| C | -6.45978700 | 12.29588900 | -3.80315400 |
| C | -5.04978000 | 12.44316900 | -4.38516900 |
| H | -6.77068300 | 13.19478600 | -3.25710800 |
| H | -7.17408400 | 12.14783100 | -4.62480300 |

|   |              |             |             |
|---|--------------|-------------|-------------|
| C | -6.23425100  | 11.37413100 | -1.42818000 |
| H | -6.18490500  | 10.44853500 | -0.84201300 |
| H | -7.05797600  | 11.98688900 | -1.03867500 |
| H | -5.29577500  | 11.92006800 | -1.27297400 |
| C | -7.78818200  | 10.29550400 | -3.05712500 |
| H | -7.86989200  | 9.46502700  | -2.35321200 |
| H | -7.89624800  | 9.89168400  | -4.07155500 |
| H | -8.61918900  | 10.98974800 | -2.87476800 |
| C | -4.20000000  | 13.48048100 | -3.64979300 |
| H | -4.18103500  | 13.31865400 | -2.56850600 |
| H | -4.60737500  | 14.48002700 | -3.83557200 |
| H | -3.17156500  | 13.46187100 | -4.02731300 |
| C | -5.07295100  | 12.82358300 | -5.86384600 |
| H | -5.73550700  | 12.17197000 | -6.43961900 |
| H | -4.06770900  | 12.78193300 | -6.30092600 |
| H | -5.44026000  | 13.85017400 | -5.96499200 |
| B | -4.87273900  | 8.82049200  | -3.06861900 |
| B | -7.52688100  | 6.05337500  | -1.68059900 |
| C | -5.25883000  | 10.25269600 | -3.40424300 |
| C | -9.13905300  | 4.20165400  | -0.00683400 |
| C | -10.31887600 | 4.04919100  | -0.75450400 |
| C | -9.15134100  | 4.80039800  | 1.26307400  |
| C | -11.52760800 | 4.39289900  | -0.14822900 |
| C | -10.38390500 | 5.13326200  | 1.82356000  |
| C | -11.56652300 | 4.90725300  | 1.13745900  |
| H | -12.45144400 | 4.27840400  | -0.71098800 |
| H | -12.51859600 | 5.16635700  | 1.59202100  |
| H | -10.41028900 | 5.59861100  | 2.80637100  |
| C | -7.88131600  | 5.19996900  | 1.99325200  |
| C | -7.84255200  | 4.66900400  | 3.42654400  |
| H | -7.99849100  | 3.58640000  | 3.47267100  |
| H | -8.61897400  | 5.14073100  | 4.04052000  |
| H | -6.87946800  | 4.89809200  | 3.89601300  |
| C | -7.74913000  | 6.72632200  | 1.99639300  |

|   |              |             |             |
|---|--------------|-------------|-------------|
| H | -7.02187400  | 4.80153200  | 1.43997400  |
| H | -6.83089400  | 7.03080600  | 2.51148700  |
| H | -8.59669900  | 7.18598100  | 2.52088100  |
| H | -7.72416200  | 7.12573000  | 0.97681200  |
| C | -10.32773400 | 3.65713400  | -2.22237000 |
| C | -11.25391900 | 2.47680700  | -2.51896800 |
| H | -11.18917400 | 2.19788000  | -3.57651500 |
| H | -12.29911000 | 2.74389900  | -2.32172300 |
| H | -11.02191500 | 1.59209900  | -1.91937700 |
| C | -10.75614300 | 4.85964000  | -3.07086900 |
| H | -9.30454900  | 3.39646700  | -2.51794300 |
| H | -10.73176400 | 4.60358600  | -4.13617600 |
| H | -10.10287600 | 5.72084400  | -2.90432200 |
| H | -11.78248700 | 5.15888600  | -2.82302500 |
| C | -3.26366700  | 10.67042300 | -4.74714500 |
| C | -2.08166300  | 10.82362000 | -4.00314600 |
| C | -2.02452300  | 9.73543400  | -6.57965700 |
| C | -0.83983400  | 9.96207500  | -5.89733300 |
| C | -0.87480300  | 10.47850400 | -4.61237000 |
| H | 0.11081800   | 9.70187500  | -6.35423600 |
| H | 0.05070500   | 10.59352100 | -4.05246900 |
| C | -2.06857700  | 11.21776800 | -2.53588000 |
| C | -1.63849800  | 10.01621000 | -1.68688900 |
| H | -2.29268000  | 9.15514200  | -1.85048400 |
| H | -1.65982200  | 10.27373700 | -0.62187200 |
| H | -0.61299900  | 9.71607100  | -1.93714100 |
| C | -1.14093700  | 12.39800600 | -2.24352100 |
| H | -3.09083100  | 11.47940500 | -2.23790100 |
| H | -1.20276500  | 12.67865900 | -1.18625800 |
| H | -1.37394600  | 13.28190300 | -2.84392700 |
| H | -0.09641900  | 12.12997300 | -2.44304800 |
| C | -3.25533200  | 10.06966200 | -6.01615200 |
| C | -4.52760000  | 9.66964900  | -6.74219500 |
| C | -4.66070600  | 8.14337000  | -6.74277000 |

|   |             |             |             |
|---|-------------|-------------|-------------|
| H | -5.58041300 | 7.83871800  | -7.25513600 |
| H | -4.68340300 | 7.74543700  | -5.72254800 |
| H | -3.81472500 | 7.68242400  | -7.26869400 |
| C | -4.56994300 | 10.19855100 | -8.17615900 |
| H | -5.38534300 | 10.06937000 | -6.18718200 |
| H | -4.41325900 | 11.28096500 | -8.22428500 |
| H | -5.53450400 | 9.96954100  | -8.64262300 |
| H | -3.79559300 | 9.72532700  | -8.79159500 |
| H | -2.00115200 | 9.26852600  | -7.56180500 |
| H | -8.57742300 | 6.45310200  | -1.25184600 |
| H | -3.82255400 | 8.42056200  | -3.49804100 |
| H | -6.99241800 | 7.12648500  | -3.63336600 |
| H | -5.40616100 | 7.74818500  | -1.11466000 |

**35. CAAC\_Full\_H\_H (planar)-singlet:**

|   |             |            |             |
|---|-------------|------------|-------------|
| C | -5.74416200 | 3.84245300 | -1.85670600 |
|---|-------------|------------|-------------|

|   |             |             |             |
|---|-------------|-------------|-------------|
| N | -7.61433700 | 3.90584500  | -0.48309800 |
| C | -5.79360800 | 2.55298900  | -1.00777800 |
| C | -7.17762000 | 2.48811800  | -0.35891100 |
| H | -5.02870100 | 2.60957700  | -0.22153700 |
| H | -5.58291800 | 1.65801500  | -1.60523100 |
| C | -6.88750800 | 4.68127500  | -1.30445800 |
| C | -6.42744600 | 7.03202300  | -2.48778400 |
| C | -6.73069400 | 8.38065500  | -2.74154400 |
| C | -6.01137300 | 3.55948000  | -3.34205000 |
| H | -6.01723500 | 4.49191700  | -3.91494200 |
| H | -6.98293100 | 3.07294400  | -3.49087700 |
| H | -5.23369900 | 2.89914500  | -3.74752500 |
| C | -4.36832600 | 4.49365300  | -1.69153700 |
| H | -3.59009100 | 3.75598900  | -1.92779800 |
| H | -4.21881700 | 4.82619500  | -0.65823500 |
| H | -4.22855900 | 5.35374100  | -2.34662000 |
| C | -7.11474200 | 2.04452000  | 1.09944700  |
| H | -6.38262900 | 2.62231100  | 1.66973200  |
| H | -6.81653800 | 0.99168600  | 1.13833600  |
| H | -8.09402900 | 2.13402500  | 1.58479100  |
| C | -8.14220400 | 1.55521400  | -1.09179000 |
| H | -8.20477800 | 1.77233700  | -2.16178200 |
| H | -9.14527200 | 1.63011100  | -0.65763200 |
| H | -7.80155200 | 0.52100700  | -0.97464900 |
| C | -7.41399800 | 11.57025500 | -3.37271300 |
| N | -5.54377700 | 11.50679100 | -4.74623500 |
| C | -7.36476600 | 12.85940000 | -4.22211300 |
| C | -5.98068900 | 12.92441700 | -4.87080100 |
| H | -7.57588600 | 13.75455800 | -3.62508400 |
| H | -8.12950300 | 12.80220100 | -5.00848400 |
| C | -7.14658100 | 11.85367900 | -1.88749900 |
| H | -7.14058800 | 10.92138500 | -1.31436800 |
| H | -7.92423600 | 12.51407200 | -1.48208100 |
| H | -6.17502800 | 12.34029500 | -1.73893800 |



|   |              |             |             |
|---|--------------|-------------|-------------|
| C | -8.78982500  | 10.91894400 | -3.53750000 |
| H | -8.92963000  | 10.05927800 | -2.88187200 |
| H | -8.93930400  | 10.58575800 | -4.57059800 |
| H | -9.56806200  | 11.65675900 | -3.30171900 |
| C | -5.01622500  | 13.85756600 | -4.13805800 |
| H | -4.95382000  | 13.64082500 | -3.06798300 |
| H | -5.35677000  | 14.89175700 | -4.25563400 |
| H | -4.01308800  | 13.78242800 | -4.57204200 |
| C | -6.04356000  | 13.36776400 | -6.32925400 |
| H | -6.77558700  | 12.78981800 | -6.89949200 |
| H | -5.06424300  | 13.27833300 | -6.81455000 |
| H | -6.34188200  | 14.42056000 | -6.36828800 |
| B | -5.93616500  | 9.25894400  | -3.65033900 |
| B | -7.22196600  | 6.15372100  | -1.57899100 |
| C | -6.27062800  | 10.73138500 | -3.92486800 |
| C | -8.83330100  | 4.34779500  | 0.12641100  |
| C | -10.03382900 | 4.31109300  | -0.60298100 |
| C | -8.78544200  | 4.85384900  | 1.43442500  |
| C | -11.20776500 | 4.67614300  | 0.05684600  |
| C | -9.98601400  | 5.20955100  | 2.04768300  |
| C | -11.19263300 | 5.09715900  | 1.37649600  |
| H | -12.14757700 | 4.65248100  | -0.49006600 |
| H | -12.11979300 | 5.37322000  | 1.87078000  |
| H | -9.96565400  | 5.60581000  | 3.06028300  |
| C | -7.48106000  | 5.14958300  | 2.15302500  |
| C | -7.43092400  | 4.53845700  | 3.55355300  |
| H | -7.63105400  | 3.46225500  | 3.54772800  |
| H | -8.17123200  | 5.00833500  | 4.21186500  |
| H | -6.44817000  | 4.70258800  | 4.00921800  |
| C | -7.28123800  | 6.66647400  | 2.23619500  |
| H | -6.65490000  | 4.74497800  | 1.55578300  |
| H | -6.33194000  | 6.90139400  | 2.73094000  |
| H | -8.08750100  | 7.12713800  | 2.82136800  |
| H | -7.27787800  | 7.12156900  | 1.24122300  |

|   |              |             |             |
|---|--------------|-------------|-------------|
| C | -10.10480700 | 4.01490000  | -2.09236000 |
| C | -11.09854100 | 2.90133600  | -2.42894600 |
| H | -11.07856500 | 2.68706500  | -3.50322300 |
| H | -12.12248900 | 3.20705200  | -2.18286600 |
| H | -10.89531200 | 1.97004800  | -1.89277300 |
| C | -10.49789900 | 5.28635800  | -2.85379900 |
| H | -9.10692600  | 3.72228300  | -2.44055100 |
| H | -10.52361100 | 5.08882500  | -3.93138300 |
| H | -9.79352800  | 6.10175100  | -2.66847900 |
| H | -11.49935700 | 5.61866700  | -2.55206200 |
| C | -4.32480200  | 11.06485700 | -5.35569600 |
| C | -3.12432500  | 11.10169000 | -4.62629000 |
| C | -3.17208400  | 10.20299900 | -7.27690400 |
| C | -1.96547000  | 10.31549100 | -6.60569800 |
| C | -1.95036600  | 10.73660000 | -5.28607000 |
| H | -1.03828700  | 10.03942300 | -7.09993700 |
| H | -1.01055100  | 10.76035700 | -4.73917100 |
| C | -3.05355000  | 11.39811800 | -3.13695200 |
| C | -2.66029800  | 10.12684000 | -2.37530900 |
| H | -3.36443700  | 9.31126300  | -2.56071300 |
| H | -2.63486800  | 10.32447500 | -1.29773900 |
| H | -1.65869200  | 9.79473900  | -2.67679600 |
| C | -2.06010100  | 12.51194300 | -2.80039500 |
| H | -4.05154200  | 11.69057100 | -2.78891800 |
| H | -2.07986000  | 12.72594200 | -1.72605900 |
| H | -2.26380300  | 13.44330400 | -3.33626500 |
| H | -1.03612100  | 12.20663200 | -3.04684100 |
| C | -4.37265800  | 10.55866400 | -6.66364000 |
| C | -5.67708700  | 10.26274900 | -7.38206800 |
| C | -5.87669500  | 8.74581700  | -7.46535900 |
| H | -6.82580700  | 8.51081300  | -7.96043000 |
| H | -5.88034900  | 8.29068600  | -6.47040700 |
| H | -5.07018600  | 8.28526900  | -8.05027400 |
| C | -5.72757800  | 10.87380600 | -8.78258200 |

|   |             |             |             |
|---|-------------|-------------|-------------|
| H | -6.50329200 | 10.66710800 | -6.78473100 |
| H | -5.52715000 | 11.94995500 | -8.77693800 |
| H | -6.71057400 | 10.70986800 | -9.23781100 |
| H | -4.98766300 | 10.40362800 | -9.44113200 |
| H | -3.19244700 | 9.80665900  | -8.28947400 |
| H | -8.16884700 | 6.62110700  | -1.00138400 |
| H | -4.98931800 | 8.79152000  | -4.22798600 |
| H | -5.57297700 | 6.66579500  | -3.07011500 |
| H | -7.58514100 | 8.74690100  | -2.15919600 |

**36. CAAC\_Full\_H\_H** (planar)-triplet:

|   |             |            |             |
|---|-------------|------------|-------------|
| C | -5.74394600 | 3.80796700 | -1.84380000 |
| N | -7.61006300 | 3.87876100 | -0.44995000 |
| C | -5.79575400 | 2.52117300 | -0.99111300 |
| C | -7.17996600 | 2.46142000 | -0.33776100 |
| H | -5.02935500 | 2.57809600 | -0.20629800 |

|   |             |             |             |
|---|-------------|-------------|-------------|
| H | -5.58945300 | 1.62249500  | -1.58481900 |
| C | -6.87916600 | 4.65167900  | -1.29033300 |
| C | -6.41055800 | 7.05220400  | -2.51069300 |
| C | -6.74768600 | 8.36047400  | -2.71867600 |
| C | -6.00796900 | 3.52912800  | -3.32962100 |
| H | -6.03235000 | 4.46722000  | -3.89537200 |
| H | -6.97140000 | 3.02714600  | -3.47926100 |
| H | -5.22022300 | 2.88962400  | -3.74942900 |
| C | -4.37200300 | 4.46683200  | -1.67875300 |
| H | -3.58460000 | 3.75098900  | -1.94888400 |
| H | -4.21279000 | 4.77025100  | -0.63762000 |
| H | -4.25380500 | 5.34896100  | -2.31005200 |
| C | -7.11569600 | 2.00980000  | 1.11853800  |
| H | -6.37961400 | 2.58191700  | 1.68975200  |
| H | -6.82494300 | 0.95477400  | 1.15524600  |
| H | -8.09397400 | 2.10514700  | 1.60531400  |
| C | -8.14711400 | 1.53179600  | -1.07330800 |
| H | -8.20330800 | 1.74702600  | -2.14404100 |
| H | -9.15207700 | 1.61435000  | -0.64437600 |
| H | -7.81445500 | 0.49514500  | -0.95332300 |
| C | -7.41430000 | 11.60471000 | -3.38557700 |
| N | -5.54817700 | 11.53391500 | -4.77942000 |
| C | -7.36248800 | 12.89150500 | -4.23826400 |
| C | -5.97827300 | 12.95125600 | -4.89161000 |
| H | -7.56879000 | 13.79018200 | -3.64455800 |
| H | -8.12888400 | 12.83458300 | -5.02308200 |
| C | -7.15028800 | 11.88354900 | -1.89975500 |
| H | -7.12591000 | 10.94545700 | -1.33400200 |
| H | -7.93803600 | 12.52305200 | -1.47995200 |
| H | -6.18685700 | 12.38553100 | -1.75010800 |
| C | -8.78624100 | 10.94584200 | -3.55063400 |
| H | -8.90443800 | 10.06370700 | -2.91934600 |
| H | -8.94545000 | 10.64243500 | -4.59177100 |
| H | -9.57364600 | 11.66168100 | -3.28049800 |

|   |              |             |             |
|---|--------------|-------------|-------------|
| C | -5.01112700  | 13.88087900 | -4.15605800 |
| H | -4.95493900  | 13.66564800 | -3.08532500 |
| H | -5.34378600  | 14.91753100 | -4.27604300 |
| H | -4.00616200  | 13.79832500 | -4.58498600 |
| C | -6.04253700  | 13.40287800 | -6.34790900 |
| H | -6.77861700  | 12.83076300 | -6.91912700 |
| H | -5.06425700  | 13.30753100 | -6.83468100 |
| H | -6.33328900  | 14.45790400 | -6.38461600 |
| B | -5.95938700  | 9.29396900  | -3.66079800 |
| B | -7.19885600  | 6.11870900  | -1.56857100 |
| C | -6.27907600  | 10.76099800 | -3.93903800 |
| C | -8.82784400  | 4.33030100  | 0.14688100  |
| C | -10.02225800 | 4.31348500  | -0.59440500 |
| C | -8.78791100  | 4.83857700  | 1.45467900  |
| C | -11.19716700 | 4.69996500  | 0.05118100  |
| C | -9.98884600  | 5.21408200  | 2.05562100  |
| C | -11.18961400 | 5.12193900  | 1.37093400  |
| H | -12.13164000 | 4.69011300  | -0.50540600 |
| H | -12.11753600 | 5.41376200  | 1.85468000  |
| H | -9.97321100  | 5.61000100  | 3.06858300  |
| C | -7.48497000  | 5.11617900  | 2.18250400  |
| C | -7.45103800  | 4.50410500  | 3.58269900  |
| H | -7.65713100  | 3.42906500  | 3.57262700  |
| H | -8.19479800  | 4.97698900  | 4.23507800  |
| H | -6.47142200  | 4.66124200  | 4.04758900  |
| C | -7.26547200  | 6.63013200  | 2.26566100  |
| H | -6.66204500  | 4.70044000  | 1.58872800  |
| H | -6.31551200  | 6.85461100  | 2.76398100  |
| H | -8.06857300  | 7.10374700  | 2.84478700  |
| H | -7.25216700  | 7.08430600  | 1.26993500  |
| C | -10.08111400 | 4.00712600  | -2.08207800 |
| C | -11.09332000 | 2.91111100  | -2.42065100 |
| H | -11.06102800 | 2.68144500  | -3.49147900 |
| H | -12.11457000 | 3.24044300  | -2.19456200 |

|   |              |             |             |
|---|--------------|-------------|-------------|
| H | -10.91669600 | 1.98367800  | -1.86839100 |
| C | -10.43587100 | 5.27891000  | -2.86111200 |
| H | -9.08534200  | 3.68981200  | -2.41333800 |
| H | -10.46387500 | 5.06952000  | -3.93643200 |
| H | -9.71055900  | 6.07855900  | -2.68422200 |
| H | -11.42749900 | 5.64558700  | -2.56685800 |
| C | -4.33039400  | 11.08237600 | -5.37624600 |
| C | -3.13598400  | 11.09918900 | -4.63495400 |
| C | -3.16938300  | 10.19859600 | -7.28498200 |
| C | -1.96861900  | 10.29073700 | -6.60028900 |
| C | -1.96107200  | 10.71270800 | -5.28053600 |
| H | -1.04069500  | 9.99891400  | -7.08403200 |
| H | -1.02660100  | 10.72255900 | -4.72394400 |
| C | -3.07713400  | 11.40554600 | -3.14728100 |
| C | -2.72238100  | 10.13376200 | -2.36824700 |
| H | -3.44769400  | 9.33411300  | -2.54513900 |
| H | -2.69438000  | 10.34315200 | -1.29292600 |
| H | -1.73075200  | 9.76708300  | -2.66249700 |
| C | -2.06492900  | 12.50156000 | -2.80870300 |
| H | -4.07290700  | 11.72286100 | -2.81602500 |
| H | -2.09722600  | 12.73122600 | -1.73787500 |
| H | -2.24154900  | 13.42899400 | -3.36096300 |
| H | -1.04367800  | 12.17222700 | -3.03478700 |
| C | -4.37032100  | 10.57410100 | -6.68404500 |
| C | -5.67325900  | 10.29650000 | -7.41187700 |
| C | -5.89275600  | 8.78254800  | -7.49503600 |
| H | -6.84271400  | 8.55806900  | -7.99336000 |
| H | -5.90606500  | 8.32837200  | -6.49931100 |
| H | -5.08965300  | 8.30893300  | -8.07415900 |
| C | -5.70718400  | 10.90857500 | -8.81207100 |
| H | -6.49618700  | 10.71223900 | -6.81810500 |
| H | -5.50109200  | 11.98361500 | -8.80199700 |
| H | -6.68679800  | 10.75143800 | -9.27696600 |
| H | -4.96342100  | 10.43569300 | -9.46444700 |

|   |             |            |             |
|---|-------------|------------|-------------|
| H | -3.18501400 | 9.80267800 | -8.29794500 |
| H | -8.13087100 | 6.60251800 | -0.98473700 |
| H | -5.02737300 | 8.81015800 | -4.24463000 |
| H | -5.56487000 | 6.70198900 | -3.11623900 |
| H | -7.59337300 | 8.71068900 | -2.11312900 |

**37. NHC\_Full\_C<sub>2</sub>H<sub>5</sub>\_Cl** (fully optimized)-singlet:

|   |              |            |             |
|---|--------------|------------|-------------|
| N | -10.24743300 | 5.14764000 | -1.96066900 |
| C | -10.28829000 | 5.99024400 | 0.05854200  |
| C | -11.07134400 | 5.46023200 | -0.90225200 |
| C | -8.95260400  | 5.46416800 | -1.68334300 |
| C | -6.55467900  | 5.97862400 | -2.79169000 |
| C | -5.27400300  | 5.51109200 | -3.29409000 |
| C | -6.71547300  | 7.46418800 | -2.51783500 |
| H | -7.66177500  | 7.61778200 | -1.98208700 |
| H | -6.84350300  | 8.02774700 | -3.45312400 |
| C | -4.80575500  | 4.17526000 | -2.72144400 |

|    |              |            |             |
|----|--------------|------------|-------------|
| H  | -5.57844200  | 3.79358800 | -2.04304300 |
| H  | -3.95403700  | 4.37600600 | -2.05993300 |
| N  | -1.98646100  | 5.44576900 | -3.83459600 |
| N  | -2.53768900  | 5.51879700 | -5.92731700 |
| C  | -0.91724500  | 4.94679600 | -4.55906900 |
| C  | -1.25950100  | 5.00744000 | -5.86325300 |
| B  | -4.44236500  | 6.22912000 | -4.26651300 |
| B  | -7.71414200  | 5.11494600 | -2.55742600 |
| Cl | -7.87310800  | 3.41152200 | -3.26525600 |
| C  | -3.01572200  | 5.76546800 | -4.67565300 |
| Cl | -5.02459800  | 7.67999100 | -5.25733100 |
| C  | -10.73314600 | 4.71562500 | -3.23626200 |
| C  | -11.25503700 | 3.42033700 | -3.33993600 |
| C  | -10.67703400 | 5.60191800 | -4.31879600 |
| C  | -11.78765200 | 3.03380500 | -4.56645700 |
| C  | -11.19966800 | 5.15161600 | -5.53245600 |
| C  | -11.76053200 | 3.89140600 | -5.65551800 |
| H  | -12.20906500 | 2.03735600 | -4.67177400 |
| H  | -12.16983700 | 3.57112500 | -6.60940000 |
| H  | -11.17193400 | 5.81543700 | -6.39297200 |
| C  | -10.12288600 | 7.01526000 | -4.24845100 |
| C  | -11.23409700 | 8.03405700 | -4.51598300 |
| H  | -12.06553200 | 7.92558600 | -3.81107000 |
| H  | -11.63884100 | 7.91520500 | -5.52840700 |
| H  | -10.84517600 | 9.05487400 | -4.43505300 |
| C  | -8.97318300  | 7.20230800 | -5.24247000 |
| H  | -9.72799500  | 7.20374200 | -3.24030100 |
| H  | -8.55570300  | 8.21228300 | -5.16069600 |
| H  | -9.32463300  | 7.07481800 | -6.27372000 |
| H  | -8.16128600  | 6.48748600 | -5.06120400 |
| C  | -11.22405000 | 2.43605400 | -2.18618600 |
| C  | -12.62372400 | 2.25050100 | -1.59491900 |
| H  | -12.60742800 | 1.53854200 | -0.76228500 |
| H  | -13.30490100 | 1.85587700 | -2.35995200 |



|   |              |             |              |
|---|--------------|-------------|--------------|
| H | -13.05263000 | 3.18999300  | -1.23034700  |
| C | -10.66194400 | 1.08036300  | -2.61699300  |
| H | -10.55613500 | 2.83747100  | -1.41212900  |
| H | -10.53585900 | 0.43155200  | -1.74360400  |
| H | -9.69248200  | 1.19007500  | -3.10948500  |
| H | -11.34406700 | 0.56618100  | -3.30417500  |
| C | -3.13773100  | 5.99178000  | -7.14539600  |
| C | -4.20607600  | 5.30785800  | -7.72756000  |
| C | -3.17828100  | 7.66496900  | -8.85187800  |
| C | -4.22231500  | 6.99309300  | -9.47038100  |
| C | -4.73725200  | 5.83931700  | -8.90371200  |
| H | -4.64839200  | 7.38289700  | -10.39054500 |
| H | -5.57596700  | 5.33181300  | -9.37448500  |
| C | -4.81384300  | 4.05660700  | -7.13291400  |
| C | -6.27271500  | 4.29024600  | -6.72631200  |
| H | -6.36788600  | 5.10009700  | -5.99350300  |
| H | -6.69286700  | 3.38492200  | -6.27215500  |
| H | -6.88437900  | 4.53834600  | -7.60384000  |
| C | -4.71598300  | 2.88254800  | -8.10928500  |
| H | -4.24921500  | 3.80169900  | -6.23184900  |
| H | -5.10849200  | 1.97015500  | -7.64756700  |
| H | -3.68340600  | 2.69281600  | -8.42121300  |
| H | -5.30750700  | 3.07270500  | -9.01345700  |
| C | -2.63186300  | 7.19248500  | -7.66236300  |
| C | -1.57249600  | 8.00941100  | -6.94621300  |
| C | -2.04576000  | 9.44449200  | -6.70414700  |
| H | -1.28963600  | 10.00278700 | -6.13808800  |
| H | -2.98631900  | 9.46267000  | -6.14352800  |
| H | -2.20050800  | 9.98093200  | -7.64769100  |
| C | -0.25069300  | 7.99811000  | -7.71352100  |
| H | -1.39169700  | 7.55964600  | -5.96325300  |
| H | 0.12592100   | 6.97889900  | -7.85745800  |
| H | 0.51399200   | 8.57254700  | -7.17698400  |
| H | -0.37540900  | 8.44897300  | -8.70636900  |

|   |              |             |             |
|---|--------------|-------------|-------------|
| H | -2.79627500  | 8.58811900  | -9.28164200 |
| N | -8.99250300  | 5.99388100  | -0.42152100 |
| C | -7.92373500  | 6.59963800  | 0.32458300  |
| C | -6.90648700  | 5.80047600  | 0.86472600  |
| C | -7.99324200  | 7.98445800  | 0.54381600  |
| C | -5.94910300  | 6.43111700  | 1.65866100  |
| C | -6.01097600  | 7.79338000  | 1.91750200  |
| C | -7.02286600  | 8.55892200  | 1.36591300  |
| H | -5.14546100  | 5.84203800  | 2.08911100  |
| H | -5.26108000  | 8.25913200  | 2.55061600  |
| H | -7.06314200  | 9.62741300  | 1.56341400  |
| C | -9.07584100  | 8.87417900  | -0.05111500 |
| C | -8.50314300  | 10.09317400 | -0.77829400 |
| H | -7.92860400  | 10.73250200 | -0.09832700 |
| H | -9.32157100  | 10.70171400 | -1.17835000 |
| H | -7.85379300  | 9.81005400  | -1.60987800 |
| C | -10.03043000 | 9.35078500  | 1.04836600  |
| H | -9.64633300  | 8.29286600  | -0.79023400 |
| H | -9.48600200  | 9.96613100  | 1.77586700  |
| H | -10.48475800 | 8.52221400  | 1.60067900  |
| H | -10.83488300 | 9.96438100  | 0.62859900  |
| C | -6.88565900  | 4.29736100  | 0.67684200  |
| C | -5.48114100  | 3.71494800  | 0.80405500  |
| H | -4.75292900  | 4.30160800  | 0.22698400  |
| H | -5.46632600  | 2.68614300  | 0.42804000  |
| H | -5.14710400  | 3.68381900  | 1.84925200  |
| C | -7.84016500  | 3.63737700  | 1.67661100  |
| H | -7.24062600  | 4.07453500  | -0.33754100 |
| H | -7.52532900  | 3.85274500  | 2.70571400  |
| H | -7.84875900  | 2.54978800  | 1.54532500  |
| H | -8.86782300  | 4.00000800  | 1.55657900  |
| H | -0.72113800  | 4.74027100  | -6.75838300 |
| H | -0.01008600  | 4.62481600  | -4.07559800 |
| H | -12.13385300 | 5.28737400  | -0.94916400 |

|   |              |             |             |
|---|--------------|-------------|-------------|
| H | -10.51214500 | 6.35727000  | 1.04643300  |
| C | -1.93933600  | 5.82857800  | -2.44827400 |
| C | -1.80528900  | 4.84301800  | -1.45990600 |
| C | -2.02433700  | 7.20112000  | -2.13433600 |
| C | -1.87791100  | 5.24923800  | -0.12466000 |
| C | -2.12435400  | 7.54501600  | -0.78961900 |
| C | -2.08335600  | 6.57635800  | 0.20666500  |
| H | -1.79308500  | 4.50133600  | 0.65941200  |
| H | -2.23070900  | 8.58916500  | -0.51479000 |
| H | -2.17271100  | 6.86929100  | 1.24918000  |
| C | -1.84420200  | 8.27892100  | -3.19464400 |
| C | -2.22575700  | 9.68719500  | -2.75029500 |
| H | -3.24372400  | 9.74589800  | -2.35594900 |
| H | -2.16098100  | 10.36033200 | -3.61251300 |
| H | -1.53473600  | 10.06930300 | -1.98795900 |
| C | -0.36630300  | 8.28580100  | -3.61833100 |
| H | -2.46712600  | 8.04414700  | -4.06781700 |
| H | 0.26485100   | 8.53267900  | -2.75521400 |
| H | -0.18718200  | 9.04227500  | -4.39239700 |
| H | -0.03352400  | 7.31904700  | -4.01010200 |
| C | -1.53739700  | 3.38286300  | -1.78089600 |
| C | -0.04126500  | 3.09511900  | -1.60152900 |
| H | 0.19592700   | 2.05927800  | -1.86830700 |
| H | 0.23893600   | 3.24482700  | -0.55080500 |
| H | 0.59372400   | 3.75942000  | -2.19703000 |
| C | -2.33010000  | 2.40642300  | -0.90950900 |
| H | -1.81746800  | 3.19918700  | -2.82635700 |
| H | -2.19162800  | 1.38438200  | -1.27866400 |
| H | -3.40118900  | 2.62591100  | -0.90971300 |
| H | -1.97784000  | 2.42003000  | 0.12884000  |
| C | -4.43832400  | 3.05345300  | -3.69055900 |
| H | -4.21899200  | 2.12211900  | -3.14964100 |
| H | -5.27141000  | 2.85274500  | -4.37418400 |
| H | -3.55280700  | 3.28246800  | -4.29850300 |

|   |             |            |             |
|---|-------------|------------|-------------|
| C | -5.54648200 | 8.05865300 | -1.73558600 |
| H | -5.27426500 | 7.40922200 | -0.89058100 |
| H | -4.66504600 | 8.12407500 | -2.38002600 |
| H | -5.76021000 | 9.06288700 | -1.34604900 |

**38. NHC\_Full\_C<sub>2</sub>H<sub>5</sub>\_Cl** (fully optimized)-triplet:

|   |              |            |             |
|---|--------------|------------|-------------|
| N | -9.31002300  | 4.72159000 | -0.40653200 |
| C | -10.48171400 | 6.58095600 | -0.39812400 |
| C | -10.43587100 | 5.33381800 | 0.10392600  |
| C | -8.59959800  | 5.59908900 | -1.22058900 |
| C | -6.30706600  | 6.35461100 | -2.63303800 |
| C | -6.51386300  | 6.64542300 | -3.94450400 |
| C | -4.97670600  | 6.73668800 | -1.97811100 |
| H | -4.66552900  | 7.73277000 | -2.32651600 |
| H | -4.21087600  | 6.05597800 | -2.38158300 |
| C | -7.71234900  | 6.03913700 | -4.65908200 |
| H | -8.53601200  | 5.87999400 | -3.94634700 |
| H | -7.41416600  | 5.01815100 | -4.96093900 |
| N | -3.45612700  | 5.95344800 | -5.06351500 |
| N | -3.08528900  | 8.05134200 | -5.56459000 |
| C | -2.13600700  | 6.07331700 | -5.46000700 |

|    |              |             |             |
|----|--------------|-------------|-------------|
| C  | -1.91330100  | 7.35992400  | -5.77973300 |
| B  | -5.51564100  | 7.54561000  | -4.74667000 |
| B  | -7.22171100  | 5.38369700  | -1.81940200 |
| Cl | -6.38037600  | 3.77687600  | -1.53382100 |
| C  | -4.08507000  | 7.19783600  | -5.11893000 |
| Cl | -6.14119600  | 9.22485100  | -5.15473100 |
| C  | -9.10419700  | 3.31273300  | -0.29493300 |
| C  | -8.69209400  | 2.78914900  | 0.93905600  |
| C  | -9.32637100  | 2.51312800  | -1.42163200 |
| C  | -8.49546700  | 1.41264600  | 1.01746900  |
| C  | -9.11525200  | 1.14219200  | -1.29079500 |
| C  | -8.69970400  | 0.59675800  | -0.08775700 |
| H  | -8.16990000  | 0.96757300  | 1.95178000  |
| H  | -8.53596000  | -0.47401000 | -0.00475400 |
| H  | -9.28463700  | 0.49678700  | -2.14946100 |
| C  | -9.80999200  | 3.07044200  | -2.74740500 |
| C  | -11.29547700 | 2.75160700  | -2.92535200 |
| H  | -11.89811300 | 3.21971200  | -2.13570700 |
| H  | -11.46955400 | 1.66871100  | -2.87966100 |
| H  | -11.65826000 | 3.11008900  | -3.89516100 |
| C  | -8.98271100  | 2.56904000  | -3.93171700 |
| H  | -9.69789100  | 4.15938000  | -2.73669300 |
| H  | -9.28063100  | 3.10061200  | -4.84675400 |
| H  | -9.13341100  | 1.49753300  | -4.11431300 |
| H  | -7.91319200  | 2.74843400  | -3.76818800 |
| C  | -8.39491100  | 3.70609400  | 2.11383200  |
| C  | -8.30617300  | 2.96918300  | 3.44566200  |
| H  | -8.22259300  | 3.69021000  | 4.26449800  |
| H  | -7.41524200  | 2.33121500  | 3.48839400  |
| H  | -9.18275900  | 2.33998000  | 3.63366400  |
| C  | -7.10019600  | 4.49116000  | 1.87049200  |
| H  | -9.21413300  | 4.43618900  | 2.19516400  |
| H  | -6.84976100  | 5.09132000  | 2.75289400  |
| H  | -7.17628900  | 5.16476500  | 1.01101500  |

|   |              |             |              |
|---|--------------|-------------|--------------|
| H | -6.26905500  | 3.80178500  | 1.67459000   |
| C | -3.27740000  | 9.34278300  | -6.15157900  |
| C | -3.56896900  | 9.39670100  | -7.51507800  |
| C | -3.35817300  | 11.71567500 | -5.95706900  |
| C | -3.59964600  | 11.80493100 | -7.32323900  |
| C | -3.72139400  | 10.65834400 | -8.09102400  |
| H | -3.72215000  | 12.78065200 | -7.78520500  |
| H | -3.96058400  | 10.73452000 | -9.14984200  |
| C | -3.83711200  | 8.14636500  | -8.32898100  |
| C | -5.31770500  | 8.09580300  | -8.71670200  |
| H | -5.95852900  | 8.18963900  | -7.83235500  |
| H | -5.55472000  | 7.15097500  | -9.22403700  |
| H | -5.57137400  | 8.91533100  | -9.40139100  |
| C | -2.94260100  | 8.05045200  | -9.56204900  |
| H | -3.63354000  | 7.27058900  | -7.70150100  |
| H | -3.14497700  | 7.12208100  | -10.10945900 |
| H | -1.88109500  | 8.06203400  | -9.29207700  |
| H | -3.12281600  | 8.88467400  | -10.25114200 |
| C | -3.20490200  | 10.47800100 | -5.34074500  |
| C | -3.04648200  | 10.32871900 | -3.84112400  |
| C | -3.71433500  | 11.45999900 | -3.06726000  |
| H | -3.72832100  | 11.22717400 | -1.99692600  |
| H | -4.75017600  | 11.60358300 | -3.39835000  |
| H | -3.17733400  | 12.40921700 | -3.18522500  |
| C | -1.57059400  | 10.20003700 | -3.46074300  |
| H | -3.56062800  | 9.39530100  | -3.55837100  |
| H | -1.09593000  | 9.35169500  | -3.96593900  |
| H | -1.45363700  | 10.05940700 | -2.38049800  |
| H | -1.02473800  | 11.10861600 | -3.74463900  |
| H | -3.31772000  | 12.62232100 | -5.36098800  |
| N | -9.39613900  | 6.74752000  | -1.23821400  |
| C | -9.46472700  | 7.77084800  | -2.24682100  |
| C | -8.61165100  | 8.87661400  | -2.16900000  |
| C | -10.47676700 | 7.67242800  | -3.21444500  |

|   |              |             |             |
|---|--------------|-------------|-------------|
| C | -8.77880000  | 9.89973600  | -3.09761700 |
| C | -9.78670000  | 9.84004100  | -4.04868600 |
| C | -10.62868700 | 8.74193700  | -4.09892300 |
| H | -8.10661900  | 10.75236900 | -3.07798800 |
| H | -9.90874200  | 10.65132200 | -4.76060700 |
| H | -11.41175600 | 8.69646300  | -4.85292700 |
| C | -11.43383600 | 6.49386000  | -3.32498600 |
| C | -11.40402000 | 5.84358600  | -4.71123000 |
| H | -11.46656000 | 6.58778300  | -5.51342200 |
| H | -12.25623800 | 5.16411800  | -4.82554800 |
| H | -10.48690700 | 5.26339600  | -4.86561900 |
| C | -12.85829700 | 6.94644700  | -2.99027900 |
| H | -11.14753300 | 5.72445100  | -2.59727300 |
| H | -13.21545900 | 7.67845100  | -3.72508600 |
| H | -12.91265500 | 7.41895600  | -2.00353400 |
| H | -13.54883900 | 6.09588000  | -3.00268100 |
| C | -7.60882200  | 8.98168300  | -1.04438000 |
| C | -6.37779800  | 9.80118800  | -1.41613100 |
| H | -5.98460900  | 9.51109500  | -2.39739000 |
| H | -5.58736800  | 9.66386100  | -0.66811000 |
| H | -6.60392000  | 10.87532900 | -1.44976800 |
| C | -8.28856600  | 9.56049100  | 0.19988300  |
| H | -7.28803300  | 7.96097900  | -0.80750900 |
| H | -8.65358500  | 10.57543500 | -0.00264800 |
| H | -7.58483100  | 9.61483100  | 1.03871300  |
| H | -9.14303800  | 8.95024600  | 0.51395200  |
| H | -1.03694700  | 7.86358300  | -6.15559100 |
| H | -1.49326100  | 5.21054000  | -5.49654800 |
| H | -11.09722000 | 4.80602900  | 0.77225200  |
| H | -11.20166200 | 7.37467000  | -0.27484600 |
| C | -4.02766200  | 4.66139500  | -4.81437900 |
| C | -5.00233400  | 4.15776900  | -5.70081500 |
| C | -3.49387300  | 3.86709900  | -3.78354300 |
| C | -5.53672000  | 2.90045800  | -5.43420500 |

|   |             |            |             |
|---|-------------|------------|-------------|
| C | -4.02389600 | 2.58869900 | -3.60420000 |
| C | -5.06090300 | 2.12198300 | -4.38788600 |
| H | -6.31895800 | 2.50815200 | -6.07796200 |
| H | -3.63338200 | 1.96806900 | -2.80191500 |
| H | -5.49243300 | 1.14321300 | -4.19819100 |
| C | -2.33588300 | 4.28515100 | -2.88905400 |
| C | -2.61763600 | 4.02490000 | -1.40513800 |
| H | -3.60041000 | 4.38779700 | -1.09782000 |
| H | -1.85296700 | 4.50749100 | -0.78658500 |
| H | -2.57869400 | 2.95225300 | -1.18146700 |
| C | -1.06711900 | 3.51562100 | -3.27732000 |
| H | -2.15573900 | 5.36047400 | -3.01866200 |
| H | -1.22624900 | 2.44089100 | -3.12316100 |
| H | -0.22098200 | 3.81995600 | -2.65108500 |
| H | -0.78151800 | 3.64869100 | -4.32534700 |
| C | -5.33329600 | 4.86747900 | -7.00204800 |
| C | -4.16563500 | 4.65449000 | -7.97914900 |
| H | -4.35092400 | 5.17937400 | -8.92578900 |
| H | -4.06157000 | 3.58508000 | -8.20288400 |
| H | -3.20930100 | 5.00756000 | -7.57950400 |
| C | -6.61603200 | 4.39265900 | -7.68002100 |
| H | -5.43344100 | 5.94539600 | -6.80854200 |
| H | -6.86318100 | 5.07214400 | -8.50436300 |
| H | -7.47497000 | 4.36569400 | -7.00165800 |
| H | -6.49184500 | 3.39111100 | -8.11094700 |
| C | -8.22806600 | 6.79332100 | -5.87770600 |
| H | -7.43271500 | 6.96261300 | -6.61549400 |
| H | -9.02200300 | 6.23352300 | -6.38543300 |
| H | -8.62212000 | 7.77581900 | -5.60005800 |
| C | -4.88561800 | 6.68525700 | -0.45472100 |
| H | -3.86704400 | 6.92828500 | -0.12986400 |
| H | -5.55835200 | 7.39448200 | 0.03919000  |
| H | -5.12113000 | 5.69113900 | -0.05956800 |



**39. NHC\_Full\_C<sub>2</sub>H<sub>5</sub>\_Cl (twisted)-singlet:**

|    |              |            |             |
|----|--------------|------------|-------------|
| N  | -9.41618100  | 4.70740300 | -0.45451800 |
| C  | -10.55028300 | 6.59184500 | -0.39424600 |
| C  | -10.55390800 | 5.31659200 | 0.03526300  |
| C  | -8.63500800  | 5.62544600 | -1.15083700 |
| C  | -6.33326300  | 6.36471900 | -2.58102000 |
| C  | -6.39734100  | 6.50417800 | -3.93087300 |
| C  | -5.06032100  | 6.84760900 | -1.86747100 |
| H  | -4.87516400  | 7.90500100 | -2.12219300 |
| H  | -4.21015100  | 6.30856400 | -2.31897300 |
| C  | -7.56496400  | 5.89411200 | -4.68032200 |
| H  | -8.39547200  | 5.73877900 | -3.97224700 |
| H  | -7.27304200  | 4.87558500 | -4.99095700 |
| N  | -3.37785400  | 5.92263500 | -5.12933300 |
| N  | -3.08565800  | 7.99240800 | -5.76283500 |
| C  | -2.10013700  | 6.03308700 | -5.64285000 |
| C  | -1.92344300  | 7.30645800 | -6.03943000 |
| B  | -5.39427200  | 7.49518200 | -4.61928600 |
| B  | -7.28048900  | 5.40781400 | -1.78610000 |
| Cl | -6.47535800  | 3.76374800 | -1.59456500 |
| C  | -4.01367400  | 7.16435600 | -5.14788200 |

|    |              |             |             |
|----|--------------|-------------|-------------|
| Cl | -6.03750600  | 9.19433200  | -4.83769600 |
| C  | -9.19213000  | 3.30211200  | -0.31771500 |
| C  | -8.82218100  | 2.79487700  | 0.93559400  |
| C  | -9.35378000  | 2.48762400  | -1.44439300 |
| C  | -8.62088500  | 1.41971800  | 1.03778500  |
| C  | -9.14068600  | 1.12037200  | -1.29165600 |
| C  | -8.77657700  | 0.59052900  | -0.06436100 |
| H  | -8.32892100  | 0.98845600  | 1.98963200  |
| H  | -8.61078500  | -0.47833900 | 0.03759800  |
| H  | -9.26187400  | 0.46517400  | -2.15027400 |
| C  | -9.78168200  | 3.04564900  | -2.78698000 |
| C  | -11.29415400 | 2.86686800  | -2.93926600 |
| H  | -11.83723700 | 3.41091200  | -2.15395700 |
| H  | -11.56554400 | 1.80628200  | -2.85749900 |
| H  | -11.63934500 | 3.22986000  | -3.91342300 |
| C  | -9.02148100  | 2.43816000  | -3.96522800 |
| H  | -9.55935700  | 4.11815800  | -2.80394400 |
| H  | -9.26677300  | 2.98833100  | -4.88458800 |
| H  | -9.28800400  | 1.38787800  | -4.13696600 |
| H  | -7.93709400  | 2.50600600  | -3.81001400 |
| C  | -8.55322900  | 3.72406000  | 2.10613900  |
| C  | -8.55526200  | 3.01380200  | 3.45544200  |
| H  | -8.49589200  | 3.74949900  | 4.26332700  |
| H  | -7.68533000  | 2.35443200  | 3.55963600  |
| H  | -9.45706700  | 2.41121800  | 3.60818900  |
| C  | -7.21621000  | 4.44698900  | 1.90226700  |
| H  | -9.34476400  | 4.48735000  | 2.13174000  |
| H  | -6.97726800  | 5.06288300  | 2.77702900  |
| H  | -7.22593000  | 5.09509300  | 1.02025500  |
| H  | -6.40926800  | 3.71598300  | 1.76382300  |
| C  | -3.29913800  | 9.30890600  | -6.27357200 |
| C  | -3.66464000  | 9.42806200  | -7.61536900 |
| C  | -3.31454600  | 11.67325100 | -5.97712600 |
| C  | -3.64869000  | 11.82521300 | -7.31805000 |

|   |              |             |              |
|---|--------------|-------------|--------------|
| C | -3.83529000  | 10.71532400 | -8.12616000  |
| H | -3.78555600  | 12.82180600 | -7.72864800  |
| H | -4.13858700  | 10.84170200 | -9.16321100  |
| C | -4.00364700  | 8.21206800  | -8.45319300  |
| C | -5.52416500  | 8.13607900  | -8.61122500  |
| H | -6.01729700  | 8.23817600  | -7.63834100  |
| H | -5.82695100  | 7.18112400  | -9.06374700  |
| H | -5.88817500  | 8.94770000  | -9.25511800  |
| C | -3.30852500  | 8.20263500  | -9.81079600  |
| H | -3.68545100  | 7.31519000  | -7.90767800  |
| H | -3.55653600  | 7.28449000  | -10.35641200 |
| H | -2.21938100  | 8.25534200  | -9.71169800  |
| H | -3.63083500  | 9.04653600  | -10.43252600 |
| C | -3.14165400  | 10.40833500 | -5.42450300  |
| C | -2.83939900  | 10.20182200 | -3.95378300  |
| C | -3.44476900  | 11.28921300 | -3.07185800  |
| H | -3.36227800  | 11.00703300 | -2.01662800  |
| H | -4.50557400  | 11.43991800 | -3.30343100  |
| H | -2.92522700  | 12.24819000 | -3.19059900  |
| C | -1.32967900  | 10.09452700 | -3.72969000  |
| H | -3.30207700  | 9.24782600  | -3.65611600  |
| H | -0.89268800  | 9.27420600  | -4.30986300  |
| H | -1.10090500  | 9.92083000  | -2.67231800  |
| H | -0.83314500  | 11.02432700 | -4.03503600  |
| H | -3.20939100  | 12.55262800 | -5.34859900  |
| N | -9.41332300  | 6.78506200  | -1.15838800  |
| C | -9.43030600  | 7.80323200  | -2.17706100  |
| C | -8.61648700  | 8.93243900  | -2.03307400  |
| C | -10.35464000 | 7.67479800  | -3.22469900  |
| C | -8.74358000  | 9.95611800  | -2.96582400  |
| C | -9.66624900  | 9.86631300  | -3.99780500  |
| C | -10.46400500 | 8.74154300  | -4.11970500  |
| H | -8.10177000  | 10.82884500 | -2.89037200  |
| H | -9.75719800  | 10.67650700 | -4.71556400  |

|   |              |             |             |
|---|--------------|-------------|-------------|
| H | -11.18431000 | 8.67734900  | -4.93254700 |
| C | -11.28697200 | 6.48262500  | -3.38460700 |
| C | -11.22826100 | 5.85585000  | -4.78134100 |
| H | -11.22834300 | 6.61272800  | -5.57324000 |
| H | -12.10412100 | 5.21716500  | -4.94139100 |
| H | -10.33354500 | 5.23733600  | -4.91200000 |
| C | -12.72573300 | 6.91066500  | -3.07568400 |
| H | -11.00260600 | 5.70656700  | -2.66348500 |
| H | -13.07750000 | 7.63692200  | -3.81939400 |
| H | -12.81026400 | 7.38178000  | -2.09093300 |
| H | -13.40052800 | 6.04735200  | -3.10392700 |
| C | -7.68505300  | 9.04057900  | -0.84934000 |
| C | -6.48349100  | 9.94517300  | -1.10478300 |
| H | -6.03396000  | 9.75745600  | -2.08586700 |
| H | -5.71929300  | 9.78444700  | -0.33482600 |
| H | -6.76716100  | 11.00507400 | -1.06197300 |
| C | -8.45552200  | 9.52187500  | 0.38413400  |
| H | -7.32292300  | 8.02607800  | -0.64647000 |
| H | -8.86697000  | 10.52333000 | 0.20496700  |
| H | -7.79476700  | 9.58031700  | 1.25679700  |
| H | -9.28654700  | 8.85374800  | 0.63376000  |
| H | -1.08919500  | 7.80216800  | -6.50976400 |
| H | -1.45875000  | 5.17059100  | -5.71185800 |
| H | -11.25475500 | 4.76689900  | 0.64349200  |
| H | -11.26433100 | 7.38970900  | -0.26530000 |
| C | -3.94051000  | 4.63710500  | -4.83788100 |
| C | -4.88748400  | 4.08848300  | -5.72713900 |
| C | -3.42395000  | 3.90061500  | -3.76146900 |
| C | -5.39106300  | 2.82354100  | -5.43569400 |
| C | -3.92851500  | 2.61761900  | -3.54570200 |
| C | -4.92234000  | 2.09411200  | -4.35068400 |
| H | -6.15001100  | 2.39061900  | -6.08148200 |
| H | -3.55244000  | 2.03964200  | -2.70526200 |
| H | -5.33110300  | 1.10926400  | -4.14236300 |

|   |             |            |             |
|---|-------------|------------|-------------|
| C | -2.31714300 | 4.40588800 | -2.85245400 |
| C | -2.64450300 | 4.17158200 | -1.37374400 |
| H | -3.68348300 | 4.41541900 | -1.14118300 |
| H | -1.98690100 | 4.77139000 | -0.73515900 |
| H | -2.48486100 | 3.12120000 | -1.10104100 |
| C | -0.99454600 | 3.70295800 | -3.17803100 |
| H | -2.19449600 | 5.48497000 | -3.01640000 |
| H | -1.10571000 | 2.62054600 | -3.03425500 |
| H | -0.19769500 | 4.04823200 | -2.50966600 |
| H | -0.66439100 | 3.86226200 | -4.20888800 |
| C | -5.26493900 | 4.79257900 | -7.01962700 |
| C | -4.13270200 | 4.63741800 | -8.04653000 |
| H | -4.38366800 | 5.17373800 | -8.97248400 |
| H | -4.00037500 | 3.57760800 | -8.29872100 |
| H | -3.17374300 | 5.02096000 | -7.68694200 |
| C | -6.55147300 | 4.28306900 | -7.66665200 |
| H | -5.38867800 | 5.86501800 | -6.80602800 |
| H | -6.84425000 | 4.96130700 | -8.47687200 |
| H | -7.39135300 | 4.21568200 | -6.96852800 |
| H | -6.40241300 | 3.29168200 | -8.11311800 |
| C | -8.06902600 | 6.68547500 | -5.88057900 |
| H | -7.26612900 | 6.89312900 | -6.59569200 |
| H | -8.84888600 | 6.14096300 | -6.42473300 |
| H | -8.47883000 | 7.65190400 | -5.56588200 |
| C | -4.97694500 | 6.67452100 | -0.35322700 |
| H | -3.98240300 | 6.96316900 | 0.00639100  |
| H | -5.70543800 | 7.28626800 | 0.18992400  |
| H | -5.14393700 | 5.63597700 | -0.04711400 |

**40. NHC\_Full\_C<sub>2</sub>H<sub>5</sub>\_Cl** (twisted)-triplet:

|    |              |            |             |
|----|--------------|------------|-------------|
| N  | -9.41494300  | 4.70704500 | -0.45499700 |
| C  | -10.54780800 | 6.59225100 | -0.39339500 |
| C  | -10.55207000 | 5.31676300 | 0.03546800  |
| C  | -8.63346200  | 5.62502800 | -1.15116600 |
| C  | -6.33252300  | 6.36531700 | -2.58251700 |
| C  | -6.39895800  | 6.50517800 | -3.93155100 |
| C  | -5.05767300  | 6.84501500 | -1.86881100 |
| H  | -4.86949700  | 7.90221200 | -2.12112300 |
| H  | -4.20827100  | 6.30449000 | -2.31987000 |
| C  | -7.56952200  | 5.89764200 | -4.67956700 |
| H  | -8.40147100  | 5.74663000 | -3.97281900 |
| H  | -7.28067700  | 4.87732000 | -4.98734300 |
| N  | -3.37904000  | 5.92442500 | -5.12577300 |
| N  | -3.08689100  | 7.99391600 | -5.76199700 |
| C  | -2.10036300  | 6.03530300 | -5.63718600 |
| C  | -1.92401000  | 7.30813400 | -6.03564100 |
| B  | -5.39567700  | 7.49769300 | -4.61896400 |
| B  | -7.27951300  | 5.40692900 | -1.78743600 |
| Cl | -6.47412900  | 3.76349100 | -1.59702900 |
| C  | -4.01579000  | 7.16593500 | -5.14787500 |
| Cl | -6.04083200  | 9.19531700 | -4.84191200 |
| C  | -9.19176500  | 3.30151700 | -0.31917900 |
| C  | -8.82307500  | 2.79305100 | 0.93405000  |
| C  | -9.35333900  | 2.48786100 | -1.44651800 |
| C  | -8.62298600  | 1.41765200 | 1.03542000  |

|   |              |             |             |
|---|--------------|-------------|-------------|
| C | -9.14148000  | 1.12034100  | -1.29453700 |
| C | -8.77862800  | 0.58933400  | -0.06736700 |
| H | -8.33208100  | 0.98550200  | 1.98718300  |
| H | -8.61384100  | -0.47974600 | 0.03397200  |
| H | -9.26283300  | 0.46579900  | -2.15362500 |
| C | -9.78033800  | 3.04677300  | -2.78904300 |
| C | -11.29289800 | 2.86901400  | -2.94178300 |
| H | -11.83591700 | 3.41322500  | -2.15655200 |
| H | -11.56483700 | 1.80855300  | -2.86017500 |
| H | -11.63763000 | 3.23225500  | -3.91600200 |
| C | -9.02025100  | 2.43888600  | -3.96716500 |
| H | -9.55707900  | 4.11910900  | -2.80569300 |
| H | -9.26435900  | 2.98971300  | -4.88646600 |
| H | -9.28793600  | 1.38899700  | -4.13948200 |
| H | -7.93590800  | 2.50534800  | -3.81119500 |
| C | -8.55404200  | 3.72112300  | 2.10544200  |
| C | -8.55714200  | 3.00988300  | 3.45421800  |
| H | -8.49741500  | 3.74494000  | 4.26265800  |
| H | -7.68782700  | 2.34968100  | 3.55824800  |
| H | -9.45952300  | 2.40797200  | 3.60621900  |
| C | -7.21648300  | 4.44324000  | 1.90250400  |
| H | -9.34496700  | 4.48502000  | 2.13133200  |
| H | -6.97767300  | 5.05896200  | 2.77742300  |
| H | -7.22541700  | 5.09138400  | 1.02052700  |
| H | -6.40989400  | 3.71177000  | 1.76449900  |
| C | -3.30086200  | 9.30959400  | -6.27451000 |
| C | -3.66634600  | 9.42706700  | -7.61641600 |
| C | -3.31838000  | 11.67430000 | -5.98062000 |
| C | -3.65218100  | 11.82454700 | -7.32183200 |
| C | -3.83783000  | 10.71362600 | -8.12871100 |
| H | -3.78963700  | 12.82059200 | -7.73356500 |
| H | -4.14098700  | 10.83855500 | -9.16599600 |
| C | -4.00399300  | 8.20998500  | -8.45309900 |
| C | -5.52408700  | 8.13449300  | -8.61503400 |

|   |              |             |              |
|---|--------------|-------------|--------------|
| H | -6.01967400  | 8.23847400  | -7.64360700  |
| H | -5.82610900  | 7.17888200  | -9.06664100  |
| H | -5.88611100  | 8.94507200  | -9.26135600  |
| C | -3.30512100  | 8.19812300  | -9.80877500  |
| H | -3.68771800  | 7.31388600  | -7.90525900  |
| H | -3.55267200  | 7.27967700  | -10.35409200 |
| H | -2.21619400  | 8.24964800  | -9.70663400  |
| H | -3.62463300  | 9.04180100  | -10.43226900 |
| C | -3.14476800  | 10.41012700 | -5.42653000  |
| C | -2.84375800  | 10.20551800 | -3.95525700  |
| C | -3.44981400  | 11.29407500 | -3.07523800  |
| H | -3.36801900  | 11.01334300 | -2.01956500  |
| H | -4.51047900  | 11.44440900 | -3.30771600  |
| H | -2.93022600  | 12.25290300 | -3.19494300  |
| C | -1.33427100  | 10.09840600 | -3.72951600  |
| H | -3.30682000  | 9.25190300  | -3.65686900  |
| H | -0.89671500  | 9.27735900  | -4.30820200  |
| H | -1.10656500  | 9.92605600  | -2.67169400  |
| H | -0.83742300  | 11.02781700 | -4.03552900  |
| H | -3.21422000  | 12.55446300 | -5.35303400  |
| N | -9.41125600  | 6.78512400  | -1.15820000  |
| C | -9.42882200  | 7.80371100  | -2.17661800  |
| C | -8.61502300  | 8.93293400  | -2.03270800  |
| C | -10.35339200 | 7.67564100  | -3.22410500  |
| C | -8.74263200  | 9.95707400  | -2.96485700  |
| C | -9.66582900  | 9.86774800  | -3.99635600  |
| C | -10.46329600 | 8.74280100  | -4.11853600  |
| H | -8.10059400  | 10.82964400 | -2.88946000  |
| H | -9.75726700  | 10.67828500 | -4.71366400  |
| H | -11.18397200 | 8.67891100  | -4.93106200  |
| C | -11.28556600 | 6.48338700  | -3.38428100  |
| C | -11.22807900 | 5.85782000  | -4.78169900  |
| H | -11.22758700 | 6.61546000  | -5.57286300  |
| H | -12.10476700 | 5.22034700  | -4.94203100  |



|   |              |             |             |
|---|--------------|-------------|-------------|
| H | -10.33423600 | 5.23829400  | -4.91353100 |
| C | -12.72418000 | 6.91088300  | -3.07384800 |
| H | -11.00037700 | 5.70689400  | -2.66393600 |
| H | -13.07679100 | 7.63732300  | -3.81698300 |
| H | -12.80800600 | 7.38158200  | -2.08885300 |
| H | -13.39872500 | 6.04736100  | -3.10187000 |
| C | -7.68180000  | 9.03987800  | -0.85030200 |
| C | -6.47901500  | 9.94218800  | -1.10820100 |
| H | -6.03129400  | 9.75271600  | -2.08985400 |
| H | -5.71397000  | 9.78075100  | -0.33922100 |
| H | -6.76058900  | 11.00266900 | -1.06594500 |
| C | -8.44965000  | 9.52245700  | 0.38423300  |
| H | -7.32100600  | 8.02484500  | -0.64793900 |
| H | -8.85958500  | 10.52466600 | 0.20582000  |
| H | -7.78771900  | 9.57948500  | 1.25609400  |
| H | -9.28158400  | 8.85571500  | 0.63469200  |
| H | -1.08928800  | 7.80339600  | -6.50563000 |
| H | -1.45829900  | 5.17318800  | -5.70447900 |
| H | -11.25313900 | 4.76721800  | 0.64357200  |
| H | -11.26141500 | 7.39040700  | -0.26379600 |
| C | -3.94117400  | 4.63878100  | -4.83427600 |
| C | -4.89010100  | 4.09054200  | -5.72195800 |
| C | -3.42240600  | 3.90101200  | -3.75959700 |
| C | -5.39363300  | 2.82574200  | -5.43010000 |
| C | -3.92682400  | 2.61802600  | -3.54376000 |
| C | -4.92289000  | 2.09537600  | -4.34655700 |
| H | -6.15366600  | 2.39333300  | -6.07497700 |
| H | -3.54884900  | 2.03935400  | -2.70463200 |
| H | -5.33147200  | 1.11051000  | -4.13797800 |
| C | -2.31443700  | 4.40518300  | -2.85133900 |
| C | -2.64122900  | 4.17080500  | -1.37242100 |
| H | -3.68015900  | 4.41453100  | -1.13945700 |
| H | -1.98345900  | 4.77061000  | -0.73399300 |
| H | -2.48142500  | 3.12041700  | -1.09985000 |

|   |             |            |             |
|---|-------------|------------|-------------|
| C | -0.99261100 | 3.70115300 | -3.17763800 |
| H | -2.19095400 | 5.48420500 | -3.01496200 |
| H | -1.10462700 | 2.61883300 | -3.03387400 |
| H | -0.19507700 | 4.04566000 | -2.50968500 |
| H | -0.66282800 | 3.86014700 | -4.20867000 |
| C | -5.26726100 | 4.79373700 | -7.01489600 |
| C | -4.13429500 | 4.63754900 | -8.04089500 |
| H | -4.38482700 | 5.17231800 | -8.96785800 |
| H | -4.00140900 | 3.57739000 | -8.29131400 |
| H | -3.17571200 | 5.02198300 | -7.68119600 |
| C | -6.55332900 | 4.28351700 | -7.66225400 |
| H | -5.39102600 | 5.86639200 | -6.80248200 |
| H | -6.84692300 | 4.96210800 | -8.47191500 |
| H | -7.39307000 | 4.21467700 | -6.96405400 |
| H | -6.40335800 | 3.29255400 | -8.10937500 |
| C | -8.06930000 | 6.68767700 | -5.88214500 |
| H | -7.26332000 | 6.89475000 | -6.59408000 |
| H | -8.84712300 | 6.14271800 | -6.42883500 |
| H | -8.48020300 | 7.65454700 | -5.57021400 |
| C | -4.97684700 | 6.67030900 | -0.35469000 |
| H | -3.98233500 | 6.95616400 | 0.00718200  |
| H | -5.70490300 | 7.28348100 | 0.18746800  |
| H | -5.14708300 | 5.63201500 | -0.04966200 |

**41. NHC\_Full\_C<sub>2</sub>H<sub>5</sub>\_Cl** (planar)-singlet:

|    |              |             |             |
|----|--------------|-------------|-------------|
| N  | -8.57596100  | 3.48546500  | -0.98783300 |
| C  | -6.99970000  | 2.08893300  | -1.58869000 |
| C  | -8.11942500  | 2.18980900  | -0.85645800 |
| C  | -7.85533800  | 4.18638500  | -1.94187100 |
| C  | -7.07022000  | 6.40143900  | -3.30711300 |
| C  | -7.09494500  | 7.81152400  | -3.59630800 |
| C  | -6.72049500  | 5.48964400  | -4.48782700 |
| H  | -6.86024800  | 4.44714000  | -4.20527600 |
| H  | -5.67129000  | 5.58875800  | -4.79597900 |
| C  | -7.15261900  | 8.69377200  | -2.30243900 |
| H  | -8.15445900  | 8.84518000  | -1.88456000 |
| H  | -6.76452200  | 9.69362200  | -2.53748200 |
| N  | -7.52063000  | 10.93700300 | -4.59684200 |
| N  | -5.72081400  | 10.85208200 | -5.79804500 |
| C  | -7.44157100  | 12.11604100 | -5.30168600 |
| C  | -6.31904700  | 12.06854500 | -6.04280000 |
| B  | -6.31539700  | 8.57037200  | -4.62850200 |
| B  | -7.88482500  | 5.70844300  | -2.25094400 |
| Cl | -9.21730600  | 6.62111200  | -1.34597200 |
| C  | -6.42621400  | 10.12680900 | -4.85537500 |
| Cl | -5.25215800  | 7.84180500  | -5.93439200 |
| C  | -9.82356600  | 3.85639600  | -0.39458300 |
| C  | -10.99178200 | 3.81011700  | -1.15876400 |
| C  | -9.80303200  | 4.25449700  | 0.94535900  |
| C  | -12.16165700 | 4.27610300  | -0.56145800 |
| C  | -10.99829300 | 4.70298000  | 1.50069200  |
| C  | -12.16277400 | 4.73553600  | 0.74720600  |
| H  | -13.08349200 | 4.28742000  | -1.13843400 |
| H  | -13.08280000 | 5.10857700  | 1.18840200  |
| H  | -11.00866700 | 5.05120500  | 2.53111300  |

|   |              |             |             |
|---|--------------|-------------|-------------|
| C | -8.52565600  | 4.25919000  | 1.76261600  |
| C | -8.70484600  | 3.53314200  | 3.09575900  |
| H | -9.08856100  | 2.51667100  | 2.95912900  |
| H | -9.40229400  | 4.06757800  | 3.75177100  |
| H | -7.74665200  | 3.46968300  | 3.62435500  |
| C | -8.02130500  | 5.68379300  | 2.00036000  |
| H | -7.75455800  | 3.72426000  | 1.19602700  |
| H | -7.09072800  | 5.66316900  | 2.58314800  |
| H | -8.75998500  | 6.26438700  | 2.56864800  |
| H | -7.83793900  | 6.21550800  | 1.06024800  |
| C | -11.01234500 | 3.31278700  | -2.59162200 |
| C | -12.10070100 | 2.25719100  | -2.79471800 |
| H | -12.04312300 | 1.84161200  | -3.80640400 |
| H | -13.10114200 | 2.69044900  | -2.67987400 |
| H | -12.00974900 | 1.43348400  | -2.07918100 |
| C | -11.20612300 | 4.47289500  | -3.57046600 |
| H | -10.04401600 | 2.84207500  | -2.81032500 |
| H | -11.25545000 | 4.10423300  | -4.60184100 |
| H | -10.38815100 | 5.19569100  | -3.49850600 |
| H | -12.14431600 | 5.00112600  | -3.35449800 |
| C | -4.30955800  | 10.72275600 | -6.06274700 |
| C | -3.41914800  | 11.03274800 | -5.02665300 |
| C | -2.51320300  | 10.33774200 | -7.58348200 |
| C | -1.60526100  | 10.58713200 | -6.56454600 |
| C | -2.05518700  | 10.93156900 | -5.29990900 |
| H | -0.53893100  | 10.52104700 | -6.76089700 |
| H | -1.33930400  | 11.14101700 | -4.50941100 |
| C | -3.89631200  | 11.46722100 | -3.65465600 |
| C | -3.85511500  | 10.30378500 | -2.66103100 |
| H | -4.32578500  | 9.40339500  | -3.07004400 |
| H | -4.37655600  | 10.56719500 | -1.72921700 |
| H | -2.81440300  | 10.05674500 | -2.41230600 |
| C | -3.11015100  | 12.65811700 | -3.10862100 |
| H | -4.93871400  | 11.79603000 | -3.75364200 |

|   |             |             |              |
|---|-------------|-------------|--------------|
| H | -3.56745300 | 13.00951200 | -2.17671400  |
| H | -3.08673500 | 13.49362000 | -3.81568400  |
| H | -2.07533000 | 12.38551600 | -2.87249900  |
| C | -3.88523200 | 10.39073800 | -7.35214700  |
| C | -4.86552800 | 10.09926600 | -8.47004000  |
| C | -4.47711900 | 8.85558700  | -9.26884400  |
| H | -5.27307900 | 8.59904700  | -9.97567700  |
| H | -4.30840500 | 7.99570200  | -8.61522100  |
| H | -3.56801900 | 9.02645600  | -9.85768100  |
| C | -4.97092300 | 11.30525000 | -9.40743700  |
| H | -5.84588900 | 9.91211100  | -8.01297100  |
| H | -5.30206000 | 12.20973600 | -8.88589900  |
| H | -5.67606800 | 11.10748400 | -10.22232400 |
| H | -3.99223300 | 11.52298100 | -9.85456200  |
| H | -2.15273300 | 10.08064200 | -8.57602300  |
| N | -6.77396100 | 3.32018400  | -2.17508000  |
| C | -5.40504600 | 3.67066100  | -2.46763700  |
| C | -4.81023800 | 3.13924000  | -3.61897700  |
| C | -4.66973000 | 4.42124800  | -1.52687000  |
| C | -3.47276200 | 3.44481700  | -3.87107100  |
| C | -2.75461000 | 4.25389400  | -3.01074200  |
| C | -3.34717900 | 4.72358600  | -1.84647400  |
| H | -2.99926000 | 3.04666600  | -4.76486700  |
| H | -1.72099200 | 4.50394400  | -3.23130100  |
| H | -2.75764600 | 5.31346300  | -1.15211100  |
| C | -5.20167000 | 4.76723100  | -0.14414200  |
| C | -4.46453800 | 5.92188100  | 0.53669500   |
| H | -3.49647700 | 5.58634700  | 0.93066000   |
| H | -5.05298400 | 6.27711200  | 1.38991200   |
| H | -4.28538300 | 6.77021500  | -0.12448500  |
| C | -5.07710100 | 3.54809600  | 0.78389000   |
| H | -6.26417800 | 5.03640600  | -0.22864600  |
| H | -4.02244400 | 3.25725000  | 0.87313600   |
| H | -5.64133900 | 2.67950300  | 0.43659200   |

|   |              |             |             |
|---|--------------|-------------|-------------|
| H | -5.43759800  | 3.80705700  | 1.78947500  |
| C | -5.54918300  | 2.22640200  | -4.58044000 |
| C | -5.37930500  | 2.66000900  | -6.03825300 |
| H | -5.60059700  | 3.72092900  | -6.17787300 |
| H | -6.04219400  | 2.07791400  | -6.68726300 |
| H | -4.35430600  | 2.48175800  | -6.38420400 |
| C | -5.04921400  | 0.78628200  | -4.42513500 |
| H | -6.61897400  | 2.25639700  | -4.33468500 |
| H | -3.97972400  | 0.73322900  | -4.66592100 |
| H | -5.57963800  | 0.11296000  | -5.10765000 |
| H | -5.17180400  | 0.40375100  | -3.40654200 |
| H | -5.85574200  | 12.79004200 | -6.69552800 |
| H | -8.21610900  | 12.86089800 | -5.20998100 |
| H | -8.65458000  | 1.48096200  | -0.24535900 |
| H | -6.28963700  | 1.28632000  | -1.70565100 |
| C | -8.63832100  | 10.73073500 | -3.71624600 |
| C | -8.66136800  | 11.46157400 | -2.52109100 |
| C | -9.65917400  | 9.84797000  | -4.08025000 |
| C | -9.75668300  | 11.29378300 | -1.67681500 |
| C | -10.71093000 | 9.68249800  | -3.17961800 |
| C | -10.76469900 | 10.39868000 | -1.99342900 |
| H | -9.79660700  | 11.85151500 | -0.74417700 |
| H | -11.50325400 | 8.97927500  | -3.41279500 |
| H | -11.59662400 | 10.25196200 | -1.31097400 |
| C | -9.68216100  | 9.14842700  | -5.42310700 |
| C | -10.34418100 | 7.77750700  | -5.33546600 |
| H | -9.92035800  | 7.20426000  | -4.50013500 |
| H | -10.18137100 | 7.21355700  | -6.25938900 |
| H | -11.42850300 | 7.85931400  | -5.19221700 |
| C | -10.38767400 | 10.04378000 | -6.44541300 |
| H | -8.64596600  | 8.99468100  | -5.75129000 |
| H | -11.42345800 | 10.23436600 | -6.13641100 |
| H | -10.40983200 | 9.56868400  | -7.43251700 |
| H | -9.88515400  | 11.01370200 | -6.54637000 |

|   |             |             |             |
|---|-------------|-------------|-------------|
| C | -7.52319500 | 12.36517600 | -2.08522400 |
| C | -7.93899300 | 13.83556700 | -2.15093400 |
| H | -7.12313000 | 14.49019900 | -1.82512600 |
| H | -8.79702500 | 14.01499400 | -1.49058700 |
| H | -8.23380600 | 14.13569200 | -3.16222400 |
| C | -7.03700900 | 12.01757400 | -0.67642400 |
| H | -6.67759700 | 12.21063300 | -2.76691900 |
| H | -6.12002100 | 12.57162900 | -0.44383400 |
| H | -6.83045600 | 10.94732700 | -0.57689400 |
| H | -7.78083100 | 12.28785200 | 0.08230700  |
| C | -6.21698400 | 8.15970800  | -1.21774300 |
| H | -6.64404300 | 7.31335600  | -0.67056200 |
| H | -5.28302500 | 7.80971500  | -1.67735800 |
| H | -5.96775200 | 8.93252200  | -0.47665400 |
| C | -7.66767400 | 5.68654500  | -5.67515700 |
| H | -7.34880500 | 5.09978200  | -6.54616400 |
| H | -8.67268700 | 5.34593000  | -5.38982100 |
| H | -7.75110500 | 6.73039400  | -5.98927900 |

**42. NHC\_Full\_C<sub>2</sub>H<sub>5</sub>\_Cl** (planar)-triplet:

|   |             |            |             |
|---|-------------|------------|-------------|
| N | -8.59574200 | 3.40699500 | -1.02080600 |
|---|-------------|------------|-------------|

|    |              |             |             |
|----|--------------|-------------|-------------|
| C  | -6.99369500  | 2.06049400  | -1.67267700 |
| C  | -8.12014400  | 2.11736100  | -0.94185500 |
| C  | -7.87606300  | 4.15702100  | -1.94347700 |
| C  | -7.08751300  | 6.43525300  | -3.27886300 |
| C  | -7.14912300  | 7.80186700  | -3.51857500 |
| C  | -6.79969200  | 5.53744800  | -4.50283500 |
| H  | -7.06324200  | 4.50039800  | -4.27228900 |
| H  | -5.72970400  | 5.53050300  | -4.74291800 |
| C  | -7.21571400  | 8.68489900  | -2.23101400 |
| H  | -8.22519500  | 8.82388500  | -1.82591000 |
| H  | -6.84698400  | 9.68746100  | -2.47387100 |
| N  | -7.52656600  | 10.93177100 | -4.59234000 |
| N  | -5.67096400  | 10.85125800 | -5.74976300 |
| C  | -7.41905500  | 12.10944400 | -5.29987500 |
| C  | -6.27580100  | 12.06374100 | -6.00684800 |
| B  | -6.31391300  | 8.59639900  | -4.57246600 |
| B  | -7.93714800  | 5.67574300  | -2.21762900 |
| Cl | -9.34524000  | 6.55880200  | -1.44442700 |
| C  | -6.40555600  | 10.11561700 | -4.81464100 |
| Cl | -4.83315600  | 7.82681800  | -5.32522600 |
| C  | -9.82617200  | 3.77857200  | -0.40096100 |
| C  | -11.01199200 | 3.72214900  | -1.13802100 |
| C  | -9.76877300  | 4.22048800  | 0.92354500  |
| C  | -12.16461000 | 4.20810400  | -0.52405400 |
| C  | -10.94859000 | 4.68611400  | 1.49832400  |
| C  | -12.13094400 | 4.70000900  | 0.77324300  |
| H  | -13.10111800 | 4.21123100  | -1.07612000 |
| H  | -13.03929100 | 5.08642400  | 1.22703000  |
| H  | -10.93202300 | 5.06213200  | 2.51905100  |
| C  | -8.46679900  | 4.25349600  | 1.69865500  |
| C  | -8.58557800  | 3.52028200  | 3.03423100  |
| H  | -8.92974900  | 2.48902100  | 2.90434900  |
| H  | -9.29157400  | 4.02580700  | 3.70413800  |
| H  | -7.61473600  | 3.49588000  | 3.54257400  |



|   |              |             |             |
|---|--------------|-------------|-------------|
| C | -7.99323000  | 5.69074600  | 1.92124800  |
| H | -7.70228000  | 3.74052000  | 1.10301200  |
| H | -7.01993400  | 5.69540700  | 2.42985400  |
| H | -8.70417100  | 6.24011300  | 2.55237900  |
| H | -7.89920700  | 6.23816700  | 0.97719300  |
| C | -11.05945100 | 3.19484600  | -2.56048200 |
| C | -12.23819400 | 2.23993800  | -2.76001400 |
| H | -12.17468200 | 1.76101400  | -3.74265500 |
| H | -13.19479500 | 2.77402800  | -2.72576000 |
| H | -12.26482300 | 1.45636400  | -1.99583700 |
| C | -11.13357000 | 4.33567400  | -3.58154100 |
| H | -10.13499900 | 2.63051600  | -2.74815000 |
| H | -11.31345100 | 3.93563600  | -4.58624800 |
| H | -10.20901400 | 4.92199400  | -3.60667200 |
| H | -11.95678500 | 5.01879500  | -3.33346800 |
| C | -4.25506900  | 10.73082100 | -5.97154000 |
| C | -3.38417700  | 11.16001700 | -4.96289500 |
| C | -2.43287300  | 10.16861400 | -7.40511900 |
| C | -1.54434100  | 10.57604600 | -6.41965700 |
| C | -2.01526500  | 11.05898000 | -5.20828000 |
| H | -0.47434600  | 10.51063600 | -6.59637000 |
| H | -1.31176100  | 11.36840300 | -4.43979400 |
| C | -3.90585000  | 11.67025600 | -3.63477400 |
| C | -3.92612300  | 10.54649400 | -2.59086300 |
| H | -4.35174600  | 9.62201300  | -2.99421300 |
| H | -4.51775200  | 10.83856000 | -1.71023300 |
| H | -2.90380100  | 10.32556700 | -2.25604900 |
| C | -3.12456500  | 12.86929400 | -3.10293100 |
| H | -4.93728600  | 12.00695000 | -3.79739800 |
| H | -3.61466600  | 13.26589300 | -2.20635500 |
| H | -3.05676500  | 13.67531000 | -3.84076100 |
| H | -2.10550300  | 12.59088900 | -2.81079400 |
| C | -3.80801700  | 10.22517700 | -7.19431000 |
| C | -4.79034700  | 9.72048100  | -8.23150100 |

|   |             |             |             |
|---|-------------|-------------|-------------|
| C | -4.28615700 | 8.47082700  | -8.94829400 |
| H | -5.08088700 | 8.04838500  | -9.57171200 |
| H | -3.96725200 | 7.70578600  | -8.23342200 |
| H | -3.44409300 | 8.69723300  | -9.61338500 |
| C | -5.11433200 | 10.82062900 | -9.24426500 |
| H | -5.71228300 | 9.44916500  | -7.69734600 |
| H | -5.54977200 | 11.70325800 | -8.76393100 |
| H | -5.82348100 | 10.46331100 | -9.99934500 |
| H | -4.20073300 | 11.13928700 | -9.76270300 |
| H | -2.05138900 | 9.77702400  | -8.34388700 |
| N | -6.77746800 | 3.31637300  | -2.20728500 |
| C | -5.44076200 | 3.71311100  | -2.55642100 |
| C | -4.87950000 | 3.20392300  | -3.73430100 |
| C | -4.70815000 | 4.54174100  | -1.67835900 |
| C | -3.59696900 | 3.62209200  | -4.08747000 |
| C | -2.90966300 | 4.53602100  | -3.30965000 |
| C | -3.45619100 | 4.97614500  | -2.11140500 |
| H | -3.15102000 | 3.24593100  | -5.00457800 |
| H | -1.93154500 | 4.89098300  | -3.62005100 |
| H | -2.87882200 | 5.64512400  | -1.48230900 |
| C | -5.16637400 | 4.83050000  | -0.25611000 |
| C | -4.37599500 | 5.93177200  | 0.44912600  |
| H | -3.37377400 | 5.57471900  | 0.71984400  |
| H | -4.88424700 | 6.20100200  | 1.38167300  |
| H | -4.26263700 | 6.83968600  | -0.14344700 |
| C | -5.02902200 | 3.56623700  | 0.60730800  |
| H | -6.22812400 | 5.11727200  | -0.27377600 |
| H | -3.97913500 | 3.24829500  | 0.63939800  |
| H | -5.62807000 | 2.72702600  | 0.24800500  |
| H | -5.34230000 | 3.78625700  | 1.63773300  |
| C | -5.61218500 | 2.23023500  | -4.63865100 |
| C | -5.55442400 | 2.64684000  | -6.10987900 |
| H | -5.84726800 | 3.69023100  | -6.24982500 |
| H | -6.21940000 | 2.01604300  | -6.70930500 |

|   |              |             |             |
|---|--------------|-------------|-------------|
| H | -4.54368000  | 2.52409000  | -6.51592800 |
| C | -5.01395700  | 0.82721500  | -4.49185000 |
| H | -6.66693200  | 2.20093000  | -4.33453700 |
| H | -3.95972800  | 0.83794900  | -4.79717400 |
| H | -5.53981500  | 0.10805000  | -5.12970300 |
| H | -5.04774100  | 0.45856400  | -3.46138300 |
| H | -5.80189500  | 12.78976100 | -6.64737800 |
| H | -8.19706800  | 12.85418200 | -5.24223900 |
| H | -8.64224100  | 1.37432000  | -0.36071100 |
| H | -6.27399200  | 1.27067400  | -1.81464600 |
| C | -8.64245300  | 10.74631800 | -3.71035600 |
| C | -8.66829600  | 11.49345200 | -2.52352600 |
| C | -9.66660200  | 9.85581600  | -4.05413900 |
| C | -9.76587200  | 11.34392100 | -1.67918800 |
| C | -10.71977600 | 9.70459900  | -3.15185000 |
| C | -10.77655800 | 10.44574500 | -1.98133900 |
| H | -9.80450200  | 11.91406000 | -0.75394300 |
| H | -11.51063600 | 8.99510200  | -3.37008800 |
| H | -11.61057200 | 10.31446300 | -1.29809500 |
| C | -9.67927800  | 9.14176800  | -5.38887800 |
| C | -10.46704800 | 7.83784200  | -5.34227400 |
| H | -10.15133100 | 7.22073700  | -4.48952400 |
| H | -10.30896300 | 7.26754700  | -6.26298200 |
| H | -11.54540600 | 8.02220400  | -5.25850600 |
| C | -10.24585100 | 10.07909000 | -6.45992500 |
| H | -8.64194600  | 8.90054000  | -5.65853300 |
| H | -11.27730700 | 10.36066700 | -6.21212700 |
| H | -10.25445500 | 9.59025100  | -7.44067800 |
| H | -9.65696600  | 10.99940100 | -6.54588300 |
| C | -7.51432300  | 12.37743200 | -2.08950200 |
| C | -7.87770700  | 13.85811900 | -2.20804500 |
| H | -7.04810100  | 14.49404200 | -1.87949700 |
| H | -8.74495500  | 14.08393900 | -1.57404400 |
| H | -8.13614500  | 14.13919000 | -3.23410800 |

|   |             |             |             |
|---|-------------|-------------|-------------|
| C | -7.07090600 | 12.06167900 | -0.65888800 |
| H | -6.66034800 | 12.16830000 | -2.74630200 |
| H | -6.13711200 | 12.58777200 | -0.42730600 |
| H | -6.90676900 | 10.98816700 | -0.51748500 |
| H | -7.81693100 | 12.38754300 | 0.07545700  |
| C | -6.26982100 | 8.16255200  | -1.15539000 |
| H | -6.65417700 | 7.26758500  | -0.65543800 |
| H | -5.31363200 | 7.88943400  | -1.62392700 |
| H | -6.07340100 | 8.91306800  | -0.37696100 |
| C | -7.62461400 | 5.89443000  | -5.73680700 |
| H | -7.35939500 | 5.26100400  | -6.59229200 |
| H | -8.68797400 | 5.73393200  | -5.52484500 |
| H | -7.50031800 | 6.93633700  | -6.05187400 |

**43. NHC\_Full\_CH<sub>3</sub>\_Cl** (fully optimized)-singlet:

|   |              |            |             |
|---|--------------|------------|-------------|
| N | -10.18146800 | 5.00708400 | -1.79420100 |
| C | -9.98829400  | 6.17514700 | 0.04986400  |
| C | -10.84626400 | 5.41375500 | -0.65729100 |
| C | -8.90839300  | 5.51071200 | -1.82519900 |
| C | -6.63520400  | 6.04177400 | -3.11999500 |
| C | -5.29603000  | 5.65249900 | -3.46599500 |
| C | -6.96193300  | 7.51802300 | -3.09205500 |

|    |              |            |             |
|----|--------------|------------|-------------|
| H  | -7.98983100  | 7.68305100 | -2.74329600 |
| H  | -6.92483100  | 7.94572800 | -4.10244400 |
| H  | -6.27197200  | 8.11355200 | -2.46747400 |
| C  | -4.95527400  | 4.18675900 | -3.26637700 |
| H  | -5.32755300  | 3.54795700 | -4.07710200 |
| H  | -5.40293300  | 3.78580300 | -2.34784100 |
| H  | -3.87710100  | 4.02370100 | -3.20479200 |
| N  | -1.82939100  | 5.38343500 | -3.64231800 |
| N  | -2.28123000  | 5.91498000 | -5.67809000 |
| C  | -0.72479900  | 5.05096800 | -4.40374300 |
| C  | -1.00973600  | 5.38527600 | -5.67863800 |
| B  | -4.22672600  | 6.48345200 | -4.05017000 |
| B  | -7.77115500  | 5.14101200 | -2.81599600 |
| Cl | -7.96515500  | 3.39686200 | -3.40153600 |
| C  | -2.80841900  | 5.91329200 | -4.42636700 |
| Cl | -4.32883200  | 8.22400600 | -4.66327000 |
| C  | -10.87454500 | 4.47855800 | -2.93154800 |
| C  | -11.23841200 | 3.12766600 | -2.93676100 |
| C  | -11.18862200 | 5.35321100 | -3.97799000 |
| C  | -11.95800100 | 2.65746100 | -4.03176500 |
| C  | -11.88268100 | 4.82420800 | -5.06706700 |
| C  | -12.27069700 | 3.49488600 | -5.09269900 |
| H  | -12.25893500 | 1.61359500 | -4.06111400 |
| H  | -12.81783200 | 3.10633300 | -5.94698300 |
| H  | -12.12722500 | 5.47602200 | -5.90264400 |
| C  | -10.82882200 | 6.82777700 | -3.97840800 |
| C  | -12.07739800 | 7.69917600 | -4.12700500 |
| H  | -12.81514800 | 7.48964600 | -3.34529300 |
| H  | -12.56258900 | 7.53630800 | -5.09656600 |
| H  | -11.80937700 | 8.75995800 | -4.07102200 |
| C  | -9.81963800  | 7.13698000 | -5.08584300 |
| H  | -10.36180800 | 7.08169900 | -3.01691400 |
| H  | -9.51247700  | 8.18876900 | -5.04415100 |
| H  | -10.26582300 | 6.95526400 | -6.07218300 |

|   |              |             |              |
|---|--------------|-------------|--------------|
| H | -8.92262400  | 6.51335300  | -4.99262300  |
| C | -10.86205700 | 2.19167400  | -1.80598800  |
| C | -12.06611800 | 1.94806000  | -0.89254100  |
| H | -11.80583000 | 1.27064800  | -0.07158400  |
| H | -12.88356500 | 1.48746600  | -1.46257600  |
| H | -12.45236800 | 2.87566400  | -0.45679400  |
| C | -10.32409900 | 0.85707400  | -2.32117700  |
| H | -10.06193500 | 2.67185400  | -1.22719800  |
| H | -9.93126000  | 0.26377700  | -1.48874400  |
| H | -9.52113800  | 1.00504900  | -3.04816100  |
| H | -11.11479800 | 0.26222200  | -2.79371300  |
| C | -2.95045100  | 6.36491500  | -6.86418000  |
| C | -3.97105900  | 5.58236400  | -7.41251000  |
| C | -3.12946800  | 7.97543000  | -8.61860000  |
| C | -4.12559600  | 7.20846600  | -9.20432000  |
| C | -4.54693300  | 6.03561400  | -8.60092400  |
| H | -4.58443400  | 7.53463900  | -10.13342000 |
| H | -5.33401100  | 5.44401300  | -9.06117500  |
| C | -4.43194300  | 4.26135500  | -6.82612700  |
| C | -5.94669700  | 4.23688600  | -6.60876400  |
| H | -6.27050000  | 5.03027900  | -5.92469000  |
| H | -6.25540600  | 3.27850500  | -6.17597600  |
| H | -6.48460300  | 4.35194100  | -7.55726300  |
| C | -4.00272800  | 3.11217800  | -7.74305200  |
| H | -3.95212800  | 4.11943400  | -5.84907300  |
| H | -4.30207900  | 2.14768800  | -7.31884000  |
| H | -2.91806400  | 3.09796100  | -7.89874100  |
| H | -4.47796000  | 3.20499000  | -8.72775500  |
| C | -2.53278200  | 7.57923500  | -7.42488200  |
| C | -1.48536300  | 8.46004800  | -6.76910300  |
| C | -1.90919600  | 9.92921400  | -6.74813900  |
| H | -1.20784300  | 10.51292500 | -6.14257700  |
| H | -2.91185100  | 10.05068300 | -6.33066200  |
| H | -1.89851800  | 10.36155200 | -7.75555700  |

|   |              |             |             |
|---|--------------|-------------|-------------|
| C | -0.13960200  | 8.32594600  | -7.48653100 |
| H | -1.37149700  | 8.13540300  | -5.72407100 |
| H | 0.23762600   | 7.29829100  | -7.48223400 |
| H | 0.61779600   | 8.96767500  | -7.02283300 |
| H | -0.24396000  | 8.63342200  | -8.53513100 |
| H | -2.81956000  | 8.90713400  | -9.08416600 |
| N | -8.80341900  | 6.23004700  | -0.65746700 |
| C | -7.71100700  | 7.04776900  | -0.21257700 |
| C | -6.50345600  | 6.45455500  | 0.18703300  |
| C | -7.91860000  | 8.43409200  | -0.16864300 |
| C | -5.48815600  | 7.30339100  | 0.62279200  |
| C | -5.68547600  | 8.67538700  | 0.72039900  |
| C | -6.89153600  | 9.23107700  | 0.33905000  |
| H | -4.52270500  | 6.88556700  | 0.89867400  |
| H | -4.88455400  | 9.31240000  | 1.08586200  |
| H | -7.03808000  | 10.30652000 | 0.40154000  |
| C | -9.17413900  | 9.11501600  | -0.68847000 |
| C | -8.83766000  | 10.24596800 | -1.66637700 |
| H | -8.37236300  | 11.09194000 | -1.14735700 |
| H | -9.75357200  | 10.62202500 | -2.13533400 |
| H | -8.15320600  | 9.91806600  | -2.45386800 |
| C | -10.00990600 | 9.67805200  | 0.46382300  |
| H | -9.77749900  | 8.37547200  | -1.23267500 |
| H | -9.42363200  | 10.41646600 | 1.02552200  |
| H | -10.32561600 | 8.90498600  | 1.17144100  |
| H | -10.90688300 | 10.18171600 | 0.08694000  |
| C | -6.33384700  | 4.95033800  | 0.24689300  |
| C | -4.87108900  | 4.52858700  | 0.18017600  |
| H | -4.34486400  | 5.04126100  | -0.63844200 |
| H | -4.78923300  | 3.44720200  | 0.01682100  |
| H | -4.34451100  | 4.75094600  | 1.11741500  |
| C | -6.99441800  | 4.41712800  | 1.52245300  |
| H | -6.84685500  | 4.51116100  | -0.61832700 |
| H | -6.51244700  | 4.84543500  | 2.41071000  |

|   |              |            |             |
|---|--------------|------------|-------------|
| H | -6.90328200  | 3.32668400 | 1.58013200  |
| H | -8.06060500  | 4.66929300 | 1.56409800  |
| H | -0.44811400  | 5.27932400 | -6.59195500 |
| H | 0.15601500   | 4.62689500 | -3.95101500 |
| H | -11.87072200 | 5.13207400 | -0.47711300 |
| H | -10.08281300 | 6.66763100 | 1.00378100  |
| C | -1.82327400  | 5.29758600 | -2.21116100 |
| C | -1.70318100  | 4.02993200 | -1.61791700 |
| C | -1.81796400  | 6.48214300 | -1.45898100 |
| C | -1.56501200  | 3.97333600 | -0.23077800 |
| C | -1.70772600  | 6.36172900 | -0.07282300 |
| C | -1.56927800  | 5.12511500 | 0.53768900  |
| H | -1.45703000  | 3.00353600 | 0.24869900  |
| H | -1.69652000  | 7.26679700 | 0.53042400  |
| H | -1.46495500  | 5.05935600 | 1.61721800  |
| C | -1.85431600  | 7.87456600 | -2.05999100 |
| C | -3.06236100  | 8.65056400 | -1.53630600 |
| H | -3.99082000  | 8.08620000 | -1.68789600 |
| H | -3.15718500  | 9.61223600 | -2.05151900 |
| H | -2.95445800  | 8.84974100 | -0.46129400 |
| C | -0.55499200  | 8.62377700 | -1.75291100 |
| H | -1.94751900  | 7.80282500 | -3.15014300 |
| H | -0.42693500  | 8.76453200 | -0.67279500 |
| H | -0.57166800  | 9.61644000 | -2.21532900 |
| H | 0.32414900   | 8.08708300 | -2.12525000 |
| C | -1.68976000  | 2.72920000 | -2.40395400 |
| C | -0.29917200  | 2.08932400 | -2.35981200 |
| H | -0.28052300  | 1.15817600 | -2.93629600 |
| H | -0.02606700  | 1.84698300 | -1.32523700 |
| H | 0.48010700   | 2.74987400 | -2.75443500 |
| C | -2.72508300  | 1.73881500 | -1.86435600 |
| H | -1.94402600  | 2.94378700 | -3.45056200 |
| H | -2.76880500  | 0.85003500 | -2.50273200 |
| H | -3.72449200  | 2.18088100 | -1.82153500 |



H -2.45851700 1.40082000 -0.85610300

**44. NHC\_Full\_CH<sub>3</sub>\_Cl** (fully optimized)-triplet:

N -9.83959600 4.52111800 -1.20208200  
C -10.60159800 6.58343800 -1.09123100  
C -10.84882200 5.31973700 -0.70248500  
C -8.91883900 5.28779000 -1.91240900  
C -6.67833000 5.74156300 -3.46136200  
C -5.33482800 5.84253400 -3.23741200  
C -7.28176000 6.41442900 -4.68246900  
H -8.27684200 6.00357000 -4.90532100  
H -6.65003600 6.26874000 -5.57249500  
H -7.38727600 7.50009700 -4.56190000  
C -4.71553900 5.16893600 -2.02531700  
H -4.77344900 4.07167000 -2.06415300

|    |              |             |             |
|----|--------------|-------------|-------------|
| H  | -5.21939900  | 5.48085200  | -1.10049900 |
| H  | -3.65793000  | 5.44785200  | -1.92192900 |
| N  | -2.59740300  | 5.01358800  | -4.88354100 |
| N  | -2.08129100  | 7.08884400  | -5.31344700 |
| C  | -1.40703900  | 5.01289100  | -5.57828100 |
| C  | -1.08827900  | 6.29400300  | -5.84484700 |
| B  | -4.38304000  | 6.73966600  | -4.08994500 |
| B  | -7.63567200  | 4.84595100  | -2.60129000 |
| Cl | -7.26652400  | 3.05001100  | -2.53808400 |
| C  | -3.05096200  | 6.31092600  | -4.69349800 |
| Cl | -4.81719300  | 8.51131400  | -4.25662000 |
| C  | -9.58637700  | 3.25859100  | -0.57041300 |
| C  | -8.89284200  | 3.26670500  | 0.64053500  |
| C  | -10.04893000 | 2.08782900  | -1.17568000 |
| C  | -8.69210100  | 2.04074300  | 1.27628900  |
| C  | -9.83663500  | 0.88926000  | -0.50182500 |
| C  | -9.16985100  | 0.86689300  | 0.71749800  |
| H  | -8.14162100  | 2.01302900  | 2.21448800  |
| H  | -9.00629700  | -0.07977700 | 1.22495300  |
| H  | -10.17431300 | -0.04314300 | -0.94434600 |
| C  | -10.70883700 | 2.14601700  | -2.53742400 |
| C  | -12.21418100 | 2.37960700  | -2.39461800 |
| H  | -12.43059500 | 3.30729400  | -1.85389400 |
| H  | -12.67626400 | 1.55256900  | -1.84075800 |
| H  | -12.69769100 | 2.44024900  | -3.37612800 |
| C  | -10.43293900 | 0.90216400  | -3.37462100 |
| H  | -10.27088500 | 3.00546500  | -3.06622700 |
| H  | -10.79159400 | 1.04934600  | -4.39831800 |
| H  | -10.95099600 | 0.02096100  | -2.97722800 |
| H  | -9.36046600  | 0.68377600  | -3.41451200 |
| C  | -8.28206700  | 4.52962400  | 1.21484100  |
| C  | -8.76507100  | 4.81201100  | 2.63506000  |
| H  | -8.31568500  | 5.73688200  | 3.01542400  |
| H  | -8.48414400  | 4.00310600  | 3.32052300  |

|   |             |             |             |
|---|-------------|-------------|-------------|
| H | -9.85436100 | 4.92222000  | 2.67415700  |
| C | -6.75640500 | 4.42192600  | 1.15394200  |
| H | -8.57685800 | 5.38177400  | 0.59060000  |
| H | -6.28340500 | 5.38608200  | 1.38979200  |
| H | -6.42991500 | 4.10874900  | 0.15557600  |
| H | -6.38827500 | 3.68117200  | 1.87593600  |
| C | -1.87042200 | 8.49402900  | -5.12777200 |
| C | -2.35566400 | 9.38154400  | -6.09228700 |
| C | -0.98072200 | 10.28355100 | -3.82232000 |
| C | -1.43728000 | 11.18493900 | -4.77082800 |
| C | -2.11528400 | 10.73817100 | -5.89736200 |
| H | -1.27150000 | 12.24918100 | -4.62795200 |
| H | -2.48452800 | 11.45799400 | -6.62173800 |
| C | -3.14521900 | 8.87048700  | -7.28014100 |
| C | -4.23668900 | 9.84073600  | -7.72018400 |
| H | -4.86434200 | 10.13955900 | -6.87445400 |
| H | -4.87690100 | 9.36909500  | -8.47251100 |
| H | -3.81624100 | 10.74387500 | -8.17886600 |
| C | -2.20752600 | 8.55424600  | -8.44761000 |
| H | -3.63834600 | 7.93939600  | -6.96418600 |
| H | -2.76839800 | 8.17568800  | -9.30943700 |
| H | -1.45813100 | 7.80293400  | -8.17691100 |
| H | -1.67476100 | 9.46056500  | -8.76264700 |
| C | -1.17981800 | 8.91238900  | -3.98609700 |
| C | -0.72253000 | 7.92864400  | -2.92684900 |
| C | -1.73931800 | 7.87234400  | -1.78142500 |
| H | -1.49656700 | 7.06014800  | -1.08212900 |
| H | -2.75813200 | 7.71251000  | -2.15217400 |
| H | -1.73184800 | 8.81726400  | -1.22195000 |
| C | 0.66905000  | 8.24732200  | -2.38407300 |
| H | -0.67359600 | 6.93348100  | -3.38900200 |
| H | 1.40761700  | 8.34944300  | -3.18572400 |
| H | 1.00261400  | 7.45032900  | -1.71096400 |
| H | 0.67169500  | 9.17645800  | -1.80278400 |

|   |              |             |             |
|---|--------------|-------------|-------------|
| H | -0.46448800  | 10.64613900 | -2.93738100 |
| N | -9.42475100  | 6.57703600  | -1.81050900 |
| C | -8.90052100  | 7.78874900  | -2.35509100 |
| C | -7.75098700  | 8.35435000  | -1.78023000 |
| C | -9.59924900  | 8.40070500  | -3.40331900 |
| C | -7.30782400  | 9.56824000  | -2.29626900 |
| C | -7.99816900  | 10.21037200 | -3.31544700 |
| C | -9.13588200  | 9.63629200  | -3.85656000 |
| H | -6.39932000  | 10.01447700 | -1.90526500 |
| H | -7.63486800  | 11.16034600 | -3.69676800 |
| H | -9.66224600  | 10.13609900 | -4.66601500 |
| C | -10.78690000 | 7.75038100  | -4.08954500 |
| C | -10.65157400 | 7.79629300  | -5.61481800 |
| H | -10.79600500 | 8.81514800  | -5.99279600 |
| H | -11.41921200 | 7.16988600  | -6.08141700 |
| H | -9.67020900  | 7.45072000  | -5.95087100 |
| C | -12.09823200 | 8.43278600  | -3.68978900 |
| H | -10.82348600 | 6.69486800  | -3.78475000 |
| H | -12.06349000 | 9.49423800  | -3.96763100 |
| H | -12.29201900 | 8.37951200  | -2.61460800 |
| H | -12.94907800 | 7.97892600  | -4.21005000 |
| C | -7.06451800  | 7.70514800  | -0.59385900 |
| C | -5.60107600  | 8.10828300  | -0.44499000 |
| H | -5.05082700  | 7.98699500  | -1.38625400 |
| H | -5.12176500  | 7.48155300  | 0.31735700  |
| H | -5.49857300  | 9.15010800  | -0.11653200 |
| C | -7.82828600  | 8.03159100  | 0.69528400  |
| H | -7.09090200  | 6.61494800  | -0.74159400 |
| H | -7.80213200  | 9.11133000  | 0.89012000  |
| H | -7.36828900  | 7.52401500  | 1.55392600  |
| H | -8.87969600  | 7.72403500  | 0.64716700  |
| H | -0.24156400  | 6.73093000  | -6.34922200 |
| H | -0.92943900  | 4.08480800  | -5.84719300 |
| H | -11.62822700 | 4.89926500  | -0.08731700 |

|   |              |            |             |
|---|--------------|------------|-------------|
| H | -11.12810000 | 7.50603500 | -0.90956900 |
| C | -3.12957800  | 3.80143400 | -4.33904400 |
| C | -4.25749400  | 3.22111500 | -4.93401300 |
| C | -2.45971600  | 3.21610200 | -3.25571600 |
| C | -4.69948500  | 2.00479800 | -4.42142400 |
| C | -2.92175000  | 1.98084100 | -2.80179800 |
| C | -4.03116000  | 1.38257800 | -3.37638200 |
| H | -5.59142000  | 1.54472200 | -4.83420900 |
| H | -2.42068000  | 1.50053000 | -1.96520200 |
| H | -4.39309200  | 0.43214200 | -2.99485800 |
| C | -1.31424000  | 3.90429000 | -2.53394200 |
| C | -1.45229900  | 3.80513400 | -1.01139200 |
| H | -2.45715900  | 4.06762500 | -0.66798900 |
| H | -0.73314400  | 4.47454600 | -0.52582200 |
| H | -1.23059900  | 2.79101600 | -0.65828500 |
| C | 0.04067800   | 3.32000200 | -2.94243800 |
| H | -1.34324600  | 4.97173200 | -2.80157100 |
| H | 0.06539400   | 2.24760900 | -2.70872900 |
| H | 0.85511000   | 3.80126700 | -2.38911100 |
| H | 0.24513100   | 3.43310100 | -4.01028800 |
| C | -4.92513800  | 3.86721400 | -6.13113900 |
| C | -4.15696200  | 3.50762200 | -7.40712800 |
| H | -4.61533200  | 3.98088600 | -8.28290100 |
| H | -4.17215900  | 2.42156700 | -7.56422600 |
| H | -3.11009100  | 3.82665100 | -7.36075000 |
| C | -6.39495500  | 3.48777500 | -6.27647900 |
| H | -4.87316000  | 4.95730700 | -5.99326400 |
| H | -6.86676500  | 4.11284000 | -7.04232300 |
| H | -6.94213800  | 3.62257200 | -5.33669400 |
| H | -6.51139900  | 2.44463500 | -6.59653700 |

**45. NHC\_Full\_CH<sub>3</sub>\_Cl** (twisted)-singlet:

|   |              |            |             |
|---|--------------|------------|-------------|
| N | -9.58836700  | 4.66891800 | -0.63369100 |
| C | -10.67282400 | 6.58382900 | -0.63121700 |
| C | -10.73538800 | 5.30895300 | -0.20641000 |
| C | -8.78876400  | 5.53745400 | -1.36860100 |
| C | -6.43307800  | 6.22645900 | -2.78434100 |
| C | -6.46189600  | 6.25662800 | -4.14367600 |
| C | -5.46858300  | 7.10774900 | -2.02946700 |
| H | -5.97751100  | 8.00372900 | -1.64120200 |
| H | -4.64279100  | 7.46259200 | -2.66472300 |
| H | -5.03366400  | 6.58716400 | -1.16390700 |
| C | -7.40896700  | 5.34208200 | -4.88428200 |
| H | -7.79479400  | 5.79806600 | -5.80669000 |
| H | -8.26686400  | 5.04420700 | -4.26321500 |
| H | -6.90108500  | 4.40910700 | -5.17135500 |
| N | -3.46607600  | 5.68573400 | -5.67164600 |
| N | -3.28518700  | 7.76977700 | -6.26030000 |
| C | -2.35217200  | 5.79368400 | -6.47354200 |

|    |              |             |             |
|----|--------------|-------------|-------------|
| C  | -2.23055800  | 7.08785200  | -6.82542800 |
| B  | -5.48936400  | 7.18041900  | -4.97378900 |
| B  | -7.40168900  | 5.30594400  | -1.94683800 |
| Cl | -6.70270200  | 3.63084000  | -1.65409600 |
| C  | -4.09938300  | 6.91318600  | -5.53243400 |
| Cl | -5.99710400  | 8.95029300  | -5.00899800 |
| C  | -9.43789700  | 3.25961100  | -0.44877200 |
| C  | -9.09890100  | 2.80166300  | 0.83204800  |
| C  | -9.66411300  | 2.40136700  | -1.52764100 |
| C  | -8.97646800  | 1.42524100  | 1.00862600  |
| C  | -9.52926000  | 1.03302000  | -1.30002000 |
| C  | -9.18549500  | 0.54941300  | -0.04854800 |
| H  | -8.70879800  | 1.02885500  | 1.98271500  |
| H  | -9.08260800  | -0.52047100 | 0.10980200  |
| H  | -9.70112600  | 0.33983600  | -2.11992700 |
| C  | -10.06431400 | 2.90116400  | -2.90237000 |
| C  | -11.54471900 | 2.59746100  | -3.14598400 |
| H  | -12.18051000 | 3.06396400  | -2.38501500 |
| H  | -11.72369300 | 1.51492800  | -3.11215000 |
| H  | -11.86318900 | 2.96070100  | -4.12941000 |
| C  | -9.19977100  | 2.29769300  | -4.01172900 |
| H  | -9.93021400  | 3.99059200  | -2.93563800 |
| H  | -9.45133300  | 2.75587200  | -4.97527400 |
| H  | -9.37386400  | 1.21913900  | -4.11022500 |
| H  | -8.13133900  | 2.45994900  | -3.82609200 |
| C  | -8.79632000  | 3.77845600  | 1.95651900  |
| C  | -8.89994900  | 3.15011400  | 3.34236900  |
| H  | -8.81880700  | 3.92508100  | 4.11078700  |
| H  | -8.08417500  | 2.43912300  | 3.51954400  |
| H  | -9.84762200  | 2.62098700  | 3.48924200  |
| C  | -7.40340800  | 4.39188300  | 1.76999000  |
| H  | -9.52830700  | 4.59916400  | 1.90846100  |
| H  | -7.16982900  | 5.06508800  | 2.60423000  |
| H  | -7.31789000  | 4.95971800  | 0.83726000  |

|   |             |             |              |
|---|-------------|-------------|--------------|
| H | -6.64256300 | 3.60190700  | 1.74252900   |
| C | -3.34059200 | 9.19377800  | -6.34971900  |
| C | -3.86727600 | 9.75625200  | -7.51350800  |
| C | -2.82534600 | 11.34373800 | -5.45945700  |
| C | -3.29246100 | 11.92978800 | -6.62707500  |
| C | -3.81935700 | 11.14275500 | -7.64070700  |
| H | -3.26197000 | 13.00987400 | -6.74009800  |
| H | -4.21412900 | 11.60995200 | -8.53998100  |
| C | -4.52476000 | 8.90236800  | -8.57933600  |
| C | -5.91963400 | 9.42678200  | -8.92008100  |
| H | -6.53293600 | 9.52219600  | -8.01830000  |
| H | -6.42439800 | 8.74479200  | -9.61277400  |
| H | -5.87123000 | 10.40789800 | -9.40734000  |
| C | -3.64896600 | 8.82863900  | -9.83023200  |
| H | -4.64641300 | 7.88721000  | -8.17340600  |
| H | -4.12187900 | 8.22093100  | -10.60961300 |
| H | -2.66613100 | 8.39641600  | -9.61033700  |
| H | -3.48593100 | 9.83385300  | -10.24032100 |
| C | -2.84393500 | 9.96033700  | -5.29335900  |
| C | -2.36697600 | 9.34296100  | -3.99332300  |
| C | -3.09260800 | 9.95823900  | -2.79423700  |
| H | -2.82063100 | 9.43031300  | -1.87321100  |
| H | -4.18071600 | 9.90239800  | -2.91436900  |
| H | -2.81573700 | 11.01150700 | -2.66218400  |
| C | -0.85207600 | 9.49809300  | -3.85289600  |
| H | -2.60382800 | 8.26907800  | -4.00590900  |
| H | -0.32053700 | 9.01966900  | -4.68304900  |
| H | -0.49671000 | 9.05369000  | -2.91678600  |
| H | -0.57438400 | 10.56002000 | -3.84658800  |
| H | -2.43892200 | 11.96904500 | -4.65765700  |
| N | -9.50770500 | 6.72187700  | -1.35447600  |
| C | -8.93762200 | 8.00478200  | -1.61198600  |
| C | -8.31230300 | 8.65943200  | -0.54738300  |
| C | -9.07217000 | 8.55942400  | -2.88948900  |



|   |              |             |             |
|---|--------------|-------------|-------------|
| C | -7.79929400  | 9.93401300  | -0.79791100 |
| C | -7.89815600  | 10.50190200 | -2.05841700 |
| C | -8.53342700  | 9.82528200  | -3.09359200 |
| H | -7.30932300  | 10.47922200 | 0.00628000  |
| H | -7.47738300  | 11.48674200 | -2.24101600 |
| H | -8.58736400  | 10.27908200 | -4.07817600 |
| C | -9.85125000  | 7.81263000  | -3.95524600 |
| C | -9.48488300  | 8.19567100  | -5.38281200 |
| H | -9.79350400  | 9.22391100  | -5.61108300 |
| H | -10.01272500 | 7.54140000  | -6.08524600 |
| H | -8.41271400  | 8.11405800  | -5.56994200 |
| C | -11.35392300 | 8.03776500  | -3.74852300 |
| H | -9.63827200  | 6.74135000  | -3.82104800 |
| H | -11.58690300 | 9.10595400  | -3.84298600 |
| H | -11.69808800 | 7.70403900  | -2.76599300 |
| H | -11.93268100 | 7.49971700  | -4.50786100 |
| C | -8.21170400  | 8.05468900  | 0.84357300  |
| C | -6.76487700  | 7.96720300  | 1.32607200  |
| H | -6.18516500  | 7.28169100  | 0.69932000  |
| H | -6.72990100  | 7.59667400  | 2.35707700  |
| H | -6.27127400  | 8.94629600  | 1.30844600  |
| C | -9.06665800  | 8.86353700  | 1.82147600  |
| H | -8.60335100  | 7.02715000  | 0.82095000  |
| H | -8.70576100  | 9.89728600  | 1.89093600  |
| H | -9.03059900  | 8.42770800  | 2.82594700  |
| H | -10.11411400 | 8.90000900  | 1.50050700  |
| H | -1.48003600  | 7.61090500  | -7.39632500 |
| H | -1.74333600  | 4.93170600  | -6.69247000 |
| H | -11.48834600 | 4.77157400  | 0.34759300  |
| H | -11.33403400 | 7.42256800  | -0.48272100 |
| C | -4.00938900  | 4.41585400  | -5.31039600 |
| C | -4.68996400  | 3.68638400  | -6.29166200 |
| C | -3.78320900  | 3.93420000  | -4.01378700 |
| C | -5.16085800  | 2.42062700  | -5.93697800 |

|   |             |            |             |
|---|-------------|------------|-------------|
| C | -4.29337200 | 2.67840700 | -3.70187000 |
| C | -4.97831800 | 1.93152300 | -4.65314900 |
| H | -5.69025800 | 1.82159800 | -6.67377400 |
| H | -4.17211700 | 2.28479200 | -2.69784000 |
| H | -5.37140800 | 0.95435400 | -4.38619700 |
| C | -2.94630600 | 4.74069100 | -3.03772200 |
| C | -3.15927600 | 4.36320800 | -1.57730800 |
| H | -4.21378800 | 4.36313100 | -1.29703400 |
| H | -2.62699000 | 5.07148900 | -0.93349600 |
| H | -2.74881900 | 3.36762500 | -1.36401800 |
| C | -1.45656200 | 4.58256700 | -3.36924700 |
| H | -3.22274200 | 5.79882700 | -3.16582000 |
| H | -1.16833300 | 3.52681800 | -3.28793000 |
| H | -0.84529000 | 5.15049700 | -2.65871700 |
| H | -1.20393400 | 4.92540000 | -4.37540000 |
| C | -4.90089100 | 4.21818800 | -7.69872400 |
| C | -3.91000700 | 3.55640600 | -8.66166300 |
| H | -4.04611100 | 3.93010900 | -9.68264100 |
| H | -4.07409100 | 2.47098500 | -8.67521500 |
| H | -2.86935000 | 3.72971300 | -8.37132600 |
| C | -6.32401800 | 3.99003800 | -8.20816400 |
| H | -4.71992000 | 5.30403900 | -7.69092600 |
| H | -6.45373300 | 4.47215400 | -9.18289800 |
| H | -7.07313800 | 4.39487300 | -7.52365500 |
| H | -6.53192500 | 2.92296300 | -8.34927200 |

**46. NHC\_Full\_CH<sub>3</sub>\_Cl (twisted)-triplet:**

|    |              |            |             |
|----|--------------|------------|-------------|
| N  | -9.59568500  | 4.60159100 | -0.84190600 |
| C  | -10.54122400 | 6.55414800 | -0.49217600 |
| C  | -10.68484000 | 5.23134400 | -0.27915300 |
| C  | -8.74406900  | 5.52242100 | -1.43381200 |
| C  | -6.34516700  | 6.28148000 | -2.68119000 |
| C  | -6.36991400  | 6.47130200 | -4.02551200 |
| C  | -5.41732700  | 7.10199600 | -1.81342700 |
| H  | -5.83069400  | 8.11138800 | -1.66143500 |
| H  | -4.42496900  | 7.23963300 | -2.26959400 |
| H  | -5.28005100  | 6.64892000 | -0.82436600 |
| C  | -7.32371700  | 5.64863200 | -4.86946600 |
| H  | -7.43126300  | 6.04036300 | -5.89087200 |
| H  | -8.32757900  | 5.57591500 | -4.43021300 |
| H  | -6.95970100  | 4.61591200 | -4.94493000 |
| N  | -3.40982400  | 5.82977200 | -5.34703200 |
| N  | -3.06306100  | 7.91848100 | -5.88620200 |
| C  | -2.16064200  | 5.91462800 | -5.92677700 |
| C  | -1.95204500  | 7.19857900 | -6.27397900 |
| B  | -5.36066400  | 7.45096800 | -4.72156400 |
| B  | -7.36162600  | 5.29811600 | -2.00119500 |
| Cl | -6.72127200  | 3.57185900 | -1.98958500 |
| C  | -3.99115800  | 7.08997300 | -5.26336300 |

|    |              |             |             |
|----|--------------|-------------|-------------|
| Cl | -5.73040300  | 9.23826700  | -4.54709200 |
| C  | -9.52085900  | 3.17778500  | -0.89605700 |
| C  | -9.11547700  | 2.50336500  | 0.25785100  |
| C  | -9.86510100  | 2.51375500  | -2.07744200 |
| C  | -9.13144500  | 1.11013100  | 0.23571300  |
| C  | -9.85355900  | 1.12073200  | -2.05680200 |
| C  | -9.50616000  | 0.42326100  | -0.90888900 |
| H  | -8.82808300  | 0.56001800  | 1.12374900  |
| H  | -9.51178100  | -0.66309800 | -0.91251500 |
| H  | -10.12296400 | 0.57626600  | -2.95903300 |
| C  | -10.22245800 | 3.24515300  | -3.35663400 |
| C  | -11.71054300 | 3.07685300  | -3.66826500 |
| H  | -12.33742200 | 3.46399700  | -2.85749300 |
| H  | -11.95626000 | 2.01557900  | -3.80282600 |
| H  | -11.97998200 | 3.60252600  | -4.59100300 |
| C  | -9.36516000  | 2.75852700  | -4.52989500 |
| H  | -10.01880300 | 4.31585500  | -3.21836900 |
| H  | -9.52652800  | 3.39534400  | -5.40863900 |
| H  | -9.63277500  | 1.73332700  | -4.81492900 |
| H  | -8.29653400  | 2.77726700  | -4.28221900 |
| C  | -8.60760300  | 3.24316800  | 1.47964400  |
| C  | -9.58425000  | 3.10295900  | 2.64710700  |
| H  | -9.21733000  | 3.62935300  | 3.53510100  |
| H  | -9.71283900  | 2.04589300  | 2.91349900  |
| H  | -10.57311900 | 3.50390900  | 2.39720900  |
| C  | -7.21408300  | 2.74944000  | 1.87035000  |
| H  | -8.51896600  | 4.30817500  | 1.22235800  |
| H  | -6.81237200  | 3.35007600  | 2.69367900  |
| H  | -6.52433600  | 2.81459300  | 1.02284900  |
| H  | -7.24104600  | 1.70704100  | 2.20955400  |
| C  | -3.35687700  | 9.19034500  | -6.47231700 |
| C  | -4.01985600  | 9.20456500  | -7.70144200 |
| C  | -3.29618100  | 11.57300500 | -6.38999700 |
| C  | -3.94819100  | 11.61950200 | -7.61614700 |

|   |             |             |              |
|---|-------------|-------------|--------------|
| C | -4.31576300 | 10.44903300 | -8.25902200  |
| H | -4.18487600 | 12.58032600 | -8.06475200  |
| H | -4.84797100 | 10.49397200 | -9.20684700  |
| C | -4.45747400 | 7.93380800  | -8.40309700  |
| C | -5.98307400 | 7.80558600  | -8.38558100  |
| H | -6.37827300 | 7.85844400  | -7.36123400  |
| H | -6.29108500 | 6.84737800  | -8.82822000  |
| H | -6.44872000 | 8.61045000  | -8.96903100  |
| C | -3.92855500 | 7.87288000  | -9.83586100  |
| H | -4.04374300 | 7.07452900  | -7.86042800  |
| H | -4.21890700 | 6.92989200  | -10.31302700 |
| H | -2.83648900 | 7.94815300  | -9.86549300  |
| H | -4.33694500 | 8.68637200  | -10.44714100 |
| C | -3.00231700 | 10.35502400 | -5.78534900  |
| C | -2.38048600 | 10.26897200 | -4.40655100  |
| C | -2.79217100 | 11.42892000 | -3.50631000  |
| H | -2.45390700 | 11.24752300 | -2.48115500  |
| H | -3.88039100 | 11.55016600 | -3.49235300  |
| H | -2.34102900 | 12.37473600 | -3.83004900  |
| C | -0.85626600 | 10.18032200 | -4.50551000  |
| H | -2.75652200 | 9.34301200  | -3.94538400  |
| H | -0.53585200 | 9.30972600  | -5.08732700  |
| H | -0.40207500 | 10.10661700 | -3.51103400  |
| H | -0.45470600 | 11.07682500 | -4.99475400  |
| H | -3.04304000 | 12.49946600 | -5.88325800  |
| N | -9.37389500 | 6.73804500  | -1.19936200  |
| C | -8.78458300 | 8.02908000  | -1.36524100  |
| C | -8.13360700 | 8.60990900  | -0.27046800  |
| C | -8.93366900 | 8.67878700  | -2.59582000  |
| C | -7.64236800 | 9.90632700  | -0.43199600  |
| C | -7.77011400 | 10.56906800 | -1.64271000  |
| C | -8.40650800 | 9.96041400  | -2.71632500  |
| H | -7.13787300 | 10.39280300 | 0.39883800   |
| H | -7.36333400 | 11.57003200 | -1.75569900  |

|   |              |             |             |
|---|--------------|-------------|-------------|
| H | -8.47668800  | 10.48046900 | -3.66699300 |
| C | -9.72893000  | 8.02918900  | -3.70949200 |
| C | -9.26751900  | 8.42145700  | -5.10849300 |
| H | -9.51347400  | 9.46681900  | -5.33306300 |
| H | -9.77931400  | 7.80381300  | -5.85485300 |
| H | -8.18851800  | 8.29559300  | -5.23573100 |
| C | -11.21270500 | 8.37030500  | -3.53342900 |
| H | -9.61615900  | 6.94178400  | -3.60305800 |
| H | -11.35791300 | 9.45644500  | -3.59377300 |
| H | -11.59800300 | 8.03382600  | -2.56504800 |
| H | -11.81726200 | 7.90401000  | -4.31962500 |
| C | -7.97447500  | 7.88844300  | 1.05543100  |
| C | -6.58923400  | 8.09867500  | 1.66848100  |
| H | -5.78894800  | 7.91066400  | 0.94834400  |
| H | -6.44966100  | 7.42973700  | 2.52385500  |
| H | -6.47335600  | 9.12281300  | 2.04262500  |
| C | -9.03632200  | 8.36368100  | 2.05255500  |
| H | -8.10725700  | 6.80952900  | 0.87772400  |
| H | -8.93003200  | 9.44375200  | 2.21816000  |
| H | -8.91664500  | 7.86201000  | 3.01943800  |
| H | -10.05445100 | 8.17914100  | 1.69838500  |
| H | -1.13285500  | 7.67625900  | -6.78677200 |
| H | -1.55527800  | 5.03154300  | -6.05479100 |
| H | -11.47036900 | 4.65962400  | 0.18868900  |
| H | -11.16223800 | 7.39302400  | -0.22270500 |
| C | -3.92425900  | 4.55235500  | -4.94388200 |
| C | -4.74338100  | 3.83590500  | -5.83206600 |
| C | -3.46332400  | 4.00444900  | -3.74245400 |
| C | -5.08920500  | 2.53203100  | -5.47950300 |
| C | -3.80306800  | 2.68382800  | -3.45439400 |
| C | -4.60707300  | 1.95403100  | -4.31276800 |
| H | -5.73861000  | 1.95692800  | -6.13332400 |
| H | -3.46024900  | 2.23909400  | -2.52362800 |
| H | -4.88172800  | 0.93324700  | -4.06295600 |

|   |             |            |             |
|---|-------------|------------|-------------|
| C | -2.62187800 | 4.80398700 | -2.76871900 |
| C | -3.09950800 | 4.60674800 | -1.32851700 |
| H | -4.18986100 | 4.65016700 | -1.25678200 |
| H | -2.67148500 | 5.37559900 | -0.67593400 |
| H | -2.77722200 | 3.63375300 | -0.93716900 |
| C | -1.14420700 | 4.41938500 | -2.87835200 |
| H | -2.72992500 | 5.86739700 | -3.02502300 |
| H | -1.02275500 | 3.34684800 | -2.67766100 |
| H | -0.54372000 | 4.96816300 | -2.14407400 |
| H | -0.73201300 | 4.62365300 | -3.87145500 |
| C | -5.23462600 | 4.46007200 | -7.12618000 |
| C | -4.17832100 | 4.38040100 | -8.23439100 |
| H | -4.55530800 | 4.86876200 | -9.14347700 |
| H | -3.96731500 | 3.33233900 | -8.48145500 |
| H | -3.23466500 | 4.86236500 | -7.96368100 |
| C | -6.52387700 | 3.83344800 | -7.65648200 |
| H | -5.43199100 | 5.52296200 | -6.91560000 |
| H | -6.93181600 | 4.45653800 | -8.46084800 |
| H | -7.29497800 | 3.72295900 | -6.88713100 |
| H | -6.33232900 | 2.84250400 | -8.08704100 |

**47. NHC\_Full\_CH<sub>3</sub>\_Cl** (planar)-singlet:

|   |              |            |             |
|---|--------------|------------|-------------|
| N | -9.88160600  | 4.44133300 | -1.30462400 |
| C | -10.79856700 | 6.42664200 | -1.15199100 |
| C | -11.00149200 | 5.12365100 | -0.88959700 |
| C | -8.96153700  | 5.29206500 | -1.89664900 |
| C | -6.53648600  | 5.98307000 | -2.89965000 |
| C | -5.17642000  | 5.70668400 | -3.22358600 |
| C | -7.23653600  | 6.93777900 | -3.88754100 |
| H | -8.29554900  | 6.68334300 | -4.00491300 |
| H | -6.77850200  | 6.80054700 | -4.87992200 |
| H | -7.16517900  | 8.00613700 | -3.66541900 |
| C | -4.47627800  | 4.75181200 | -2.23599200 |
| H | -4.54791500  | 3.68348300 | -2.45820400 |
| H | -4.93400600  | 4.88906800 | -1.24346900 |
| H | -3.41719200  | 5.00604600 | -2.11889300 |
| N | -2.16244100  | 5.14697800 | -4.39624400 |
| N | -1.83145300  | 7.24878900 | -4.81869500 |
| C | -0.91475200  | 5.26340900 | -4.97207300 |
| C | -0.71176200  | 6.56643300 | -5.23420600 |
| B | -4.23491400  | 6.69047500 | -3.87010400 |
| B | -7.47813400  | 4.99941900 | -2.25313500 |
| C | -2.75150300  | 6.39800400 | -4.22665500 |
| C | -9.69028700  | 3.10195200 | -0.82296000 |
| C | -9.22352800  | 2.95330600 | 0.48367900  |
| C | -9.99551800  | 2.02265200 | -1.65486500 |
| C | -9.08865000  | 1.65225700 | 0.97037800  |
| C | -9.85661500  | 0.74523700 | -1.12317000 |
| C | -9.41217200  | 0.56173100 | 0.18084900  |



|   |              |             |             |
|---|--------------|-------------|-------------|
| H | -8.70754900  | 1.49930900  | 1.97760300  |
| H | -9.30041800  | -0.44420200 | 0.57567600  |
| H | -10.07347700 | -0.12042600 | -1.74173300 |
| C | -10.39973900 | 2.26088700  | -3.09463000 |
| C | -11.91343500 | 2.45801100  | -3.20259200 |
| H | -12.25898300 | 3.29718700  | -2.58897900 |
| H | -12.43873000 | 1.55623600  | -2.86338400 |
| H | -12.21152100 | 2.65245500  | -4.23893000 |
| C | -9.93210600  | 1.14710500  | -4.02464700 |
| H | -9.90169500  | 3.18684300  | -3.41713800 |
| H | -10.10433700 | 1.43087300  | -5.06769500 |
| H | -10.48182600 | 0.21412000  | -3.85103400 |
| H | -8.86289700  | 0.94921100  | -3.89433100 |
| C | -8.77438700  | 4.12930700  | 1.33082300  |
| C | -9.43312900  | 4.13277100  | 2.70943700  |
| H | -9.13845000  | 5.03049200  | 3.26561200  |
| H | -9.12621500  | 3.26405100  | 3.30393300  |
| H | -10.52579900 | 4.11987000  | 2.63616800  |
| C | -7.24778600  | 4.12194300  | 1.46435600  |
| H | -9.06730600  | 5.06160300  | 0.82995500  |
| H | -6.91153300  | 4.96135000  | 2.08576100  |
| H | -6.75286300  | 4.19230000  | 0.48755900  |
| H | -6.90930500  | 3.19438300  | 1.94340900  |
| C | -2.02281100  | 8.58828100  | -5.30007700 |
| C | -2.48926800  | 8.73725900  | -6.60679100 |
| C | -1.85669600  | 10.94493100 | -4.99918800 |
| C | -2.30070500  | 11.12875000 | -6.30331900 |
| C | -2.62395500  | 10.03842700 | -7.09323200 |
| H | -2.41237600  | 12.13478300 | -6.69791500 |
| H | -3.00480700  | 10.19162800 | -8.10051200 |
| C | -2.93864300  | 7.56148300  | -7.45412600 |
| C | -4.46530300  | 7.56896400  | -7.58711800 |
| H | -4.95990800  | 7.49811700  | -6.61019800 |
| H | -4.80180400  | 6.72991700  | -8.20888100 |

|   |              |             |             |
|---|--------------|-------------|-------------|
| H | -4.80388700  | 8.49681700  | -8.06553300 |
| C | -2.28043200  | 7.55835000  | -8.83299000 |
| H | -2.64560600  | 6.62904600  | -6.95358800 |
| H | -2.57498600  | 6.66054900  | -9.38909700 |
| H | -1.18773900  | 7.57167600  | -8.76016700 |
| H | -2.58793600  | 8.42696700  | -9.42733400 |
| C | -1.71782100  | 9.66738500  | -4.46781300 |
| C | -1.31380400  | 9.42865000  | -3.02807100 |
| C | -1.78011200  | 10.54285100 | -2.09792000 |
| H | -1.60834700  | 10.25869300 | -1.05490500 |
| H | -2.84905900  | 10.74213600 | -2.22830400 |
| H | -1.22918800  | 11.47517000 | -2.27131800 |
| C | 0.19968300   | 9.22982000  | -2.92020000 |
| H | -1.81285200  | 8.50320800  | -2.70562900 |
| H | 0.54428400   | 8.39036500  | -3.53395700 |
| H | 0.49757100   | 9.03485800  | -1.88390100 |
| H | 0.72597400   | 10.13107100 | -3.25924800 |
| H | -1.64014900  | 11.81045300 | -4.38032600 |
| N | -9.55076100  | 6.54305000  | -1.72757500 |
| C | -8.99128200  | 7.85895300  | -1.85312500 |
| C | -7.95651300  | 8.25710200  | -0.99560800 |
| C | -9.55416300  | 8.72765900  | -2.79736300 |
| C | -7.46223300  | 9.55155400  | -1.14150300 |
| C | -8.00790600  | 10.43503600 | -2.06130000 |
| C | -9.05687600  | 10.02783800 | -2.86809300 |
| H | -6.64539200  | 9.87614400  | -0.50343300 |
| H | -7.61165700  | 11.44233000 | -2.14846400 |
| H | -9.48133800  | 10.71710100 | -3.59411200 |
| C | -10.61572900 | 8.29071800  | -3.78998400 |
| C | -10.19353300 | 8.60967100  | -5.22780100 |
| H | -10.19756300 | 9.69086600  | -5.40816900 |
| H | -10.89540500 | 8.16032700  | -5.93863400 |
| H | -9.18899800  | 8.23679300  | -5.44830200 |
| C | -11.95783300 | 8.96259800  | -3.49079900 |

|   |              |             |             |
|---|--------------|-------------|-------------|
| H | -10.73834200 | 7.20234100  | -3.70978400 |
| H | -11.85521000 | 10.05346100 | -3.55329700 |
| H | -12.33059600 | 8.72632600  | -2.48869700 |
| H | -12.71933000 | 8.65726600  | -4.21691100 |
| C | -7.42222300  | 7.37555300  | 0.11316800  |
| C | -5.90704200  | 7.48378200  | 0.27037600  |
| H | -5.40803100  | 7.39925100  | -0.70434400 |
| H | -5.53999400  | 6.67719100  | 0.91682200  |
| H | -5.60596400  | 8.43153200  | 0.73371200  |
| C | -8.16247000  | 7.69735400  | 1.41414600  |
| H | -7.63180600  | 6.33535200  | -0.14327700 |
| H | -8.00092400  | 8.74199700  | 1.71030500  |
| H | -7.81400800  | 7.05578600  | 2.23410400  |
| H | -9.24492100  | 7.54429200  | 1.30087400  |
| H | 0.10768400   | 7.08969000  | -5.70025800 |
| H | -0.30951000  | 4.38940300  | -5.14969500 |
| H | -11.82101000 | 4.60041700  | -0.42364200 |
| H | -11.40394100 | 7.30063000  | -0.97473200 |
| C | -2.72190700  | 3.83105500  | -4.27081400 |
| C | -3.75673400  | 3.43303700  | -5.12832300 |
| C | -2.15886200  | 2.96215700  | -3.32685200 |
| C | -4.25095700  | 2.13853900  | -4.98264600 |
| C | -2.65611400  | 1.66195300  | -3.25632100 |
| C | -3.70517300  | 1.25489600  | -4.06307000 |
| H | -5.06782100  | 1.81402600  | -5.62072400 |
| H | -2.23152400  | 0.97254500  | -2.53051300 |
| H | -4.10138500  | 0.24757400  | -3.97606300 |
| C | -1.09709000  | 3.39888500  | -2.33436200 |
| C | -1.51904400  | 3.07974900  | -0.89651300 |
| H | -2.52350100  | 3.45269500  | -0.67576600 |
| H | -0.81699500  | 3.52891400  | -0.18574300 |
| H | -1.51509000  | 1.99852500  | -0.71631200 |
| C | 0.24491000   | 2.72695000  | -2.63389000 |
| H | -0.97442500  | 4.48726700  | -2.41442800 |

|    |             |            |             |
|----|-------------|------------|-------------|
| H  | 0.14221000  | 1.63608500 | -2.57153000 |
| H  | 1.00656100  | 3.03211600 | -1.90787000 |
| H  | 0.61751100  | 2.96333800 | -3.63602400 |
| C  | -4.29108900 | 4.31481500 | -6.23688400 |
| C  | -3.55092300 | 3.99332900 | -7.53798300 |
| H  | -3.89938700 | 4.63516500 | -8.35773100 |
| H  | -3.71254800 | 2.94878100 | -7.83443700 |
| H  | -2.46845800 | 4.14629500 | -7.42471900 |
| C  | -5.80626600 | 4.20660300 | -6.39403000 |
| H  | -4.08146700 | 5.35495700 | -5.98020500 |
| H  | -6.17333200 | 5.01314200 | -7.04052800 |
| H  | -6.30522300 | 4.29120000 | -5.41929200 |
| H  | -6.10737400 | 3.25882400 | -6.85728400 |
| Cl | -4.65082200 | 8.48617200 | -3.94576900 |
| Cl | -7.06243900 | 3.20372200 | -2.17672000 |

48. NHC\_Full\_CH<sub>3</sub>\_Cl (planar)-triplet:

|    |              |             |             |
|----|--------------|-------------|-------------|
| N  | -9.91978400  | 4.41706800  | -1.37099200 |
| C  | -10.77863400 | 6.42223800  | -1.11232000 |
| C  | -11.00817200 | 5.11424600  | -0.89746700 |
| C  | -8.98694700  | 5.27304300  | -1.94825400 |
| C  | -6.51387600  | 6.00260300  | -2.92730200 |
| C  | -5.19915800  | 5.68727500  | -3.19597900 |
| C  | -7.17897900  | 6.89301400  | -3.99621700 |
| H  | -8.21931600  | 6.58761900  | -4.17576600 |
| H  | -6.64345500  | 6.77746800  | -4.95156000 |
| H  | -7.18130300  | 7.96263300  | -3.76802600 |
| C  | -4.53388000  | 4.79684500  | -2.12715900 |
| H  | -4.53201900  | 3.72715600  | -2.35516400 |
| H  | -5.06900700  | 4.91277600  | -1.17164100 |
| H  | -3.49336500  | 5.10189900  | -1.94802300 |
| N  | -2.17009800  | 5.15526100  | -4.40849000 |
| N  | -1.79344700  | 7.27298900  | -4.75229400 |
| C  | -0.93466900  | 5.26779600  | -5.01100400 |
| C  | -0.70507100  | 6.57578200  | -5.22581100 |
| B  | -4.20040200  | 6.70102100  | -3.84887000 |
| B  | -7.51280900  | 4.98902100  | -2.27441600 |
| Cl | -7.13603400  | 3.19929600  | -2.48728900 |
| C  | -2.72628600  | 6.41702300  | -4.17503500 |
| Cl | -4.57730900  | 8.49068500  | -3.63600200 |
| C  | -9.70018000  | 3.07679300  | -0.91270000 |
| C  | -9.15434300  | 2.91409000  | 0.36110500  |
| C  | -10.04052700 | 2.00344000  | -1.73968100 |
| C  | -8.98595100  | 1.60912700  | 0.82647300  |
| C  | -9.86348000  | 0.72080600  | -1.23181700 |
| C  | -9.34748400  | 0.52549400  | 0.04394900  |
| H  | -8.55213700  | 1.44869200  | 1.81130900  |
| H  | -9.20957800  | -0.48419300 | 0.42065300  |
| H  | -10.10828400 | -0.13952300 | -1.84742300 |

|   |              |             |             |
|---|--------------|-------------|-------------|
| C | -10.52876400 | 2.25535600  | -3.15080600 |
| C | -12.04628700 | 2.45098300  | -3.16801200 |
| H | -12.35510500 | 3.28521600  | -2.52889900 |
| H | -12.54996300 | 1.54603700  | -2.80531200 |
| H | -12.40511500 | 2.65292600  | -4.18351100 |
| C | -10.11599000 | 1.15203500  | -4.11844200 |
| H | -10.05224400 | 3.18639600  | -3.49078200 |
| H | -10.34864000 | 1.44634300  | -5.14676200 |
| H | -10.65425500 | 0.21668400  | -3.92302900 |
| H | -9.04105600  | 0.95264900  | -4.05297700 |
| C | -8.67721000  | 4.08521600  | 1.19802500  |
| C | -9.35847100  | 4.12425100  | 2.56468000  |
| H | -9.02124200  | 4.99866600  | 3.13385100  |
| H | -9.11949600  | 3.23217400  | 3.15637400  |
| H | -10.44831400 | 4.18028200  | 2.46792900  |
| C | -7.15413600  | 4.03387500  | 1.34633700  |
| H | -8.93231800  | 5.01793900  | 0.67939900  |
| H | -6.79014300  | 4.90562500  | 1.90497800  |
| H | -6.65870700  | 4.01566800  | 0.36706200  |
| H | -6.84582100  | 3.13442800  | 1.89432900  |
| C | -2.01294900  | 8.61329000  | -5.21056300 |
| C | -2.55868800  | 8.77601700  | -6.48441400 |
| C | -1.84937200  | 10.96928300 | -4.89154100 |
| C | -2.36528900  | 11.16460700 | -6.16733300 |
| C | -2.72690500  | 10.08098200 | -6.94983100 |
| H | -2.50306300  | 12.17429500 | -6.54408300 |
| H | -3.16064400  | 10.24144000 | -7.93469200 |
| C | -3.03586100  | 7.60490700  | -7.32135200 |
| C | -4.55892100  | 7.65638700  | -7.46976400 |
| H | -5.05440200  | 7.67451400  | -6.49051900 |
| H | -4.92299300  | 6.78476000  | -8.02853200 |
| H | -4.86712000  | 8.55593800  | -8.01764800 |
| C | -2.35453400  | 7.56578000  | -8.68797200 |
| H | -2.78083500  | 6.67216000  | -6.80270100 |

|   |              |             |             |
|---|--------------|-------------|-------------|
| H | -2.69182200  | 6.69138300  | -9.25713400 |
| H | -1.26470100  | 7.50964000  | -8.59116100 |
| H | -2.59338300  | 8.45786100  | -9.27970800 |
| C | -1.67251100  | 9.68664700  | -4.38360900 |
| C | -1.18423300  | 9.43481400  | -2.97248300 |
| C | -1.59678500  | 10.53822600 | -2.00485300 |
| H | -1.36409700  | 10.24390100 | -0.97654700 |
| H | -2.67167900  | 10.73780800 | -2.07022500 |
| H | -1.05836300  | 11.47347600 | -2.20031800 |
| C | 0.33328800   | 9.23911100  | -2.95542200 |
| H | -1.66075800  | 8.50381800  | -2.63240700 |
| H | 0.64198900   | 8.40476300  | -3.59444100 |
| H | 0.69223600   | 9.03731900  | -1.93993500 |
| H | 0.83694500   | 10.14398900 | -3.31833100 |
| H | -1.60446900  | 11.82960500 | -4.27596700 |
| N | -9.54322600  | 6.53478500  | -1.71483800 |
| C | -8.96481400  | 7.82934600  | -1.90123800 |
| C | -7.86560900  | 8.21875300  | -1.11833200 |
| C | -9.54680000  | 8.68115700  | -2.84983800 |
| C | -7.32812600  | 9.48327900  | -1.34913300 |
| C | -7.89463800  | 10.34982100 | -2.27278900 |
| C | -9.00626000  | 9.95698200  | -3.00029900 |
| H | -6.45391100  | 9.79708100  | -0.78723200 |
| H | -7.46249400  | 11.33405600 | -2.42778100 |
| H | -9.44287900  | 10.63477200 | -3.72994700 |
| C | -10.67437400 | 8.24370500  | -3.76651800 |
| C | -10.33241600 | 8.51124700  | -5.23551100 |
| H | -10.32505200 | 9.58614400  | -5.45003300 |
| H | -11.08398000 | 8.05617000  | -5.88956100 |
| H | -9.35064800  | 8.10976800  | -5.50357400 |
| C | -11.98007200 | 8.95743300  | -3.40872000 |
| H | -10.81712600 | 7.16142800  | -3.64797300 |
| H | -11.85403200 | 10.04319000 | -3.50819600 |
| H | -12.29743400 | 8.75800900  | -2.38001900 |

|   |              |            |             |
|---|--------------|------------|-------------|
| H | -12.79074800 | 8.65257900 | -4.07970500 |
| C | -7.32317500  | 7.35405300 | 0.00189900  |
| C | -5.82489200  | 7.53324300 | 0.22903500  |
| H | -5.27465800  | 7.47886000 | -0.71994300 |
| H | -5.45336600  | 6.73964800 | 0.88870300  |
| H | -5.59014600  | 8.48991400 | 0.71222000  |
| C | -8.12501900  | 7.62298300 | 1.27904800  |
| H | -7.47023100  | 6.30306800 | -0.26780400 |
| H | -8.01859100  | 8.66944600 | 1.59274000  |
| H | -7.77508300  | 6.98595000 | 2.10222600  |
| H | -9.19495600  | 7.42341500 | 1.12911100  |
| H | 0.11723800   | 7.09343800 | -5.69341900 |
| H | -0.35147400  | 4.38927200 | -5.23515900 |
| H | -11.83044700 | 4.59656500 | -0.42982800 |
| H | -11.36186000 | 7.30075100 | -0.88821200 |
| C | -2.74855400  | 3.86071700 | -4.22229500 |
| C | -3.84768800  | 3.47139100 | -5.00527300 |
| C | -2.16651400  | 3.00870700 | -3.27389100 |
| C | -4.38501900  | 2.20673300 | -4.77486800 |
| C | -2.70692800  | 1.73279200 | -3.12375400 |
| C | -3.81846800  | 1.33999900 | -3.85141000 |
| H | -5.25912100  | 1.89297000 | -5.33696600 |
| H | -2.27020100  | 1.05484900 | -2.39430600 |
| H | -4.25048700  | 0.35566200 | -3.69671700 |
| C | -1.03879500  | 3.44588400 | -2.35727700 |
| C | -1.38049500  | 3.17802300 | -0.88829400 |
| H | -2.36193700  | 3.58001500 | -0.61981000 |
| H | -0.62846400  | 3.63242400 | -0.23430600 |
| H | -1.38846000  | 2.10306700 | -0.67411300 |
| C | 0.26676500   | 2.73213700 | -2.71554800 |
| H | -0.89598600  | 4.52817300 | -2.47558700 |
| H | 0.14070700   | 1.64637800 | -2.61606800 |
| H | 1.07770800   | 3.03694000 | -2.04486200 |
| H | 0.58373200   | 2.93156100 | -3.74438000 |



|   |             |            |             |
|---|-------------|------------|-------------|
| C | -4.39011800 | 4.33627700 | -6.12533900 |
| C | -3.58851600 | 4.06716700 | -7.40259500 |
| H | -3.93837600 | 4.70424300 | -8.22576000 |
| H | -3.69517500 | 3.02071200 | -7.71623700 |
| H | -2.51852000 | 4.26653500 | -7.25273500 |
| C | -5.88850600 | 4.15745300 | -6.35211000 |
| H | -4.24278100 | 5.38721900 | -5.85561600 |
| H | -6.26009600 | 4.95129600 | -7.01145200 |
| H | -6.43840300 | 4.21168200 | -5.40292800 |
| H | -6.12361000 | 3.20095600 | -6.83545400 |

**49. NHC\_Full\_H\_CI (fully optimized)-singlet:**

|   |             |            |             |
|---|-------------|------------|-------------|
| N | -8.66435100 | 3.59956800 | -0.90844400 |
| C | -6.82988100 | 2.40244400 | -0.98573800 |
| C | -8.02446000 | 2.50332100 | -0.37024000 |

|    |              |             |             |
|----|--------------|-------------|-------------|
| C  | -7.89266900  | 4.19898500  | -1.87519200 |
| C  | -7.21609600  | 6.14209700  | -3.60518300 |
| C  | -7.33816400  | 7.45972200  | -4.09021700 |
| N  | -7.53236600  | 10.56645900 | -4.77978500 |
| N  | -5.54692400  | 10.62995800 | -5.64214800 |
| C  | -7.30147500  | 11.86449500 | -5.18638600 |
| C  | -6.06783000  | 11.90549900 | -5.72172600 |
| B  | -6.28859600  | 8.25634100  | -4.75443400 |
| B  | -8.15858100  | 5.51284800  | -2.65415200 |
| Cl | -9.69649000  | 6.43818600  | -2.22581400 |
| C  | -6.44456200  | 9.76533700  | -5.05813400 |
| Cl | -4.67281600  | 7.46373200  | -5.14678800 |
| C  | -10.04101800 | 3.87333600  | -0.63930800 |
| C  | -10.98702700 | 3.46121600  | -1.57881400 |
| C  | -10.36868500 | 4.54562300  | 0.54500700  |
| C  | -12.31958000 | 3.78587400  | -1.32396500 |
| C  | -11.71234700 | 4.84135500  | 0.75378600  |
| C  | -12.67595300 | 4.47661600  | -0.17903400 |
| H  | -13.08326600 | 3.49589300  | -2.04198300 |
| H  | -13.71779000 | 4.72849200  | -0.00167600 |
| H  | -12.01532500 | 5.37092500  | 1.65110100  |
| C  | -9.28876700  | 4.98148800  | 1.52218900  |
| C  | -9.83354300  | 5.26854100  | 2.91792200  |
| H  | -10.45427300 | 4.45052700  | 3.29883900  |
| H  | -10.43638500 | 6.18446800  | 2.92821500  |
| H  | -9.00583600  | 5.42397300  | 3.61658300  |
| C  | -8.52702600  | 6.21091400  | 1.00798000  |
| H  | -8.56563900  | 4.15619600  | 1.61214500  |
| H  | -7.82177500  | 6.56062500  | 1.77127700  |
| H  | -9.22505100  | 7.02723700  | 0.78068000  |
| H  | -7.96379200  | 6.00985200  | 0.09010200  |
| C  | -10.63124200 | 2.70358800  | -2.84635300 |
| C  | -11.33123200 | 1.34303300  | -2.87099900 |
| H  | -11.03662800 | 0.77727300  | -3.76188700 |

|   |              |             |             |
|---|--------------|-------------|-------------|
| H | -12.42092800 | 1.46289200  | -2.90290500 |
| H | -11.08779500 | 0.74392300  | -1.98732500 |
| C | -10.99731300 | 3.51486000  | -4.09140600 |
| H | -9.54570400  | 2.52221500  | -2.86870900 |
| H | -10.77201000 | 2.94339300  | -4.99874300 |
| H | -10.45012400 | 4.46211600  | -4.13276300 |
| H | -12.07020500 | 3.74373800  | -4.10124100 |
| C | -4.13161800  | 10.43459400 | -5.77601900 |
| C | -3.33025700  | 10.78093700 | -4.68623300 |
| C | -2.24263800  | 9.78811500  | -7.07358700 |
| C | -1.41438200  | 10.14133400 | -6.01530400 |
| C | -1.95150600  | 10.62047500 | -4.83180100 |
| H | -0.33864200  | 10.02221000 | -6.11059900 |
| H | -1.29701800  | 10.85819700 | -3.99657000 |
| C | -3.91204200  | 11.19040300 | -3.34483800 |
| C | -3.81340100  | 10.00166400 | -2.38466000 |
| H | -4.32444400  | 9.12474900  | -2.79651500 |
| H | -4.26121300  | 10.24260100 | -1.41085100 |
| H | -2.76251500  | 9.73033300  | -2.21696600 |
| C | -3.23579600  | 12.42527700 | -2.75502100 |
| H | -4.97787300  | 11.42958300 | -3.47136100 |
| H | -3.73806500  | 12.71909000 | -1.82601100 |
| H | -3.26677400  | 13.27633000 | -3.44319000 |
| H | -2.18574800  | 12.23078200 | -2.50739300 |
| C | -3.62352600  | 9.91921300  | -6.97028100 |
| C | -4.56505900  | 9.48351800  | -8.07382300 |
| C | -4.00821700  | 8.32844000  | -8.89759100 |
| H | -4.77669400  | 7.94759400  | -9.57748600 |
| H | -3.68398300  | 7.50590700  | -8.25133400 |
| H | -3.15891300  | 8.64238600  | -9.51656900 |
| C | -4.91982700  | 10.67082500 | -8.97184500 |
| H | -5.48492400  | 9.12504700  | -7.58851600 |
| H | -5.37968100  | 11.48691500 | -8.40366500 |
| H | -5.62006700  | 10.37153400 | -9.75961700 |

|   |             |             |             |
|---|-------------|-------------|-------------|
| H | -4.01659300 | 11.06532600 | -9.45420300 |
| H | -1.80787500 | 9.38086000  | -7.98118800 |
| N | -6.75892600 | 3.42517500  | -1.90281000 |
| C | -5.62532900 | 3.60046000  | -2.75352100 |
| C | -5.57981600 | 2.87333000  | -3.94796400 |
| C | -4.62802800 | 4.49861600  | -2.36482600 |
| C | -4.48595000 | 3.08908700  | -4.78478000 |
| C | -3.48021200 | 3.97454500  | -4.42682900 |
| C | -3.54442000 | 4.66129100  | -3.22488400 |
| H | -4.42585300 | 2.56112100  | -5.73216300 |
| H | -2.64131900 | 4.13788600  | -5.09705800 |
| H | -2.75681300 | 5.36287700  | -2.96180300 |
| C | -4.70365600 | 5.29690000  | -1.07849400 |
| C | -4.53581600 | 6.79243400  | -1.34669000 |
| H | -3.55149100 | 7.01418200  | -1.77893100 |
| H | -4.61802400 | 7.35834300  | -0.41031000 |
| H | -5.29945000 | 7.15864900  | -2.04422000 |
| C | -3.64783200 | 4.79575500  | -0.09109100 |
| H | -5.69673400 | 5.14967100  | -0.63181800 |
| H | -2.64117900 | 4.92455300  | -0.50895900 |
| H | -3.77876400 | 3.73142600  | 0.13577600  |
| H | -3.69389100 | 5.35546300  | 0.84959200  |
| C | -6.70609700 | 1.94489100  | -4.36104800 |
| C | -7.69542100 | 2.69572200  | -5.25640800 |
| H | -8.09418900 | 3.58930200  | -4.76173200 |
| H | -8.53189100 | 2.04364600  | -5.53841100 |
| H | -7.19430600 | 3.02397900  | -6.17627600 |
| C | -6.20400000 | 0.68582700  | -5.06487200 |
| H | -7.24369000 | 1.62858700  | -3.45488700 |
| H | -5.79662800 | 0.91655000  | -6.05581500 |
| H | -7.03060500 | -0.01563800 | -5.21775200 |
| H | -5.42331100 | 0.17621900  | -4.49055300 |
| H | -5.48521600 | 12.71390700 | -6.13281200 |
| H | -8.05673900 | 12.62226600 | -5.05131800 |

|   |              |             |             |
|---|--------------|-------------|-------------|
| H | -8.49859100  | 1.90368300  | 0.38955200  |
| H | -6.01741400  | 1.70242500  | -0.87625400 |
| C | -8.72809300  | 10.25770600 | -4.04631800 |
| C | -8.64657000  | 10.13466400 | -2.65341300 |
| C | -9.93382500  | 10.15254000 | -4.74922300 |
| C | -9.83241000  | 9.92010900  | -1.95725800 |
| C | -11.09272900 | 9.93156700  | -4.00450500 |
| C | -11.04371100 | 9.82428800  | -2.62386000 |
| H | -9.80084000  | 9.79983400  | -0.87810500 |
| H | -12.04584000 | 9.83632500  | -4.51459300 |
| H | -11.95633200 | 9.64280900  | -2.06368200 |
| C | -9.96374100  | 10.17463500 | -6.26550400 |
| C | -9.56521100  | 8.79246300  | -6.79346500 |
| H | -8.57115500  | 8.49057300  | -6.44776500 |
| H | -9.57669100  | 8.77684100  | -7.88951300 |
| H | -10.27653500 | 8.03904000  | -6.43214300 |
| C | -11.31538200 | 10.58633500 | -6.84004900 |
| H | -9.21661500  | 10.90089400 | -6.61631500 |
| H | -12.07095900 | 9.80852200  | -6.67934600 |
| H | -11.23342200 | 10.72946500 | -7.92199400 |
| H | -11.68892200 | 11.51698200 | -6.39927900 |
| C | -7.32124900  | 10.21070600 | -1.92348900 |
| C | -7.05241600  | 11.63917200 | -1.44621700 |
| H | -6.06932000  | 11.71060700 | -0.96116200 |
| H | -7.81141900  | 11.96122700 | -0.72143300 |
| H | -7.06685800  | 12.34870000 | -2.28456700 |
| C | -7.22887100  | 9.19874700  | -0.78387800 |
| H | -6.53376500  | 9.93624000  | -2.63239600 |
| H | -6.20820500  | 9.18848500  | -0.38265600 |
| H | -7.46879900  | 8.18732200  | -1.14337800 |
| H | -7.90142200  | 9.44146100  | 0.04857400  |
| H | -8.29499600  | 7.92650200  | -3.86055900 |
| H | -6.29661900  | 5.63826700  | -3.90591800 |

**50. NHC\_Full\_H\_CI (fully optimized)-triplet:**

|   |             |             |             |
|---|-------------|-------------|-------------|
| N | -8.54450200 | 3.50495900  | -0.79932900 |
| C | -6.70184100 | 2.36340500  | -1.16356800 |
| C | -7.87083600 | 2.34044400  | -0.49371300 |
| C | -7.81750200 | 4.27760800  | -1.68554200 |
| C | -7.34718400 | 6.33929000  | -3.39144400 |
| C | -7.67057300 | 7.50943200  | -4.01409500 |
| N | -7.48139200 | 10.67906700 | -4.83045000 |
| N | -5.64326900 | 10.38137000 | -5.97735000 |

|    |              |             |             |
|----|--------------|-------------|-------------|
| C  | -7.06384300  | 11.91505300 | -5.27463400 |
| C  | -5.91729900  | 11.73696500 | -5.96041900 |
| B  | -6.74383600  | 8.19028200  | -5.04008700 |
| B  | -8.16560200  | 5.63668400  | -2.30059600 |
| Cl | -9.68576700  | 6.48853300  | -1.74946900 |
| C  | -6.63108800  | 9.68546900  | -5.28883200 |
| Cl | -5.56758800  | 7.10678800  | -5.92364000 |
| C  | -9.92797600  | 3.69224500  | -0.50594900 |
| C  | -10.85790200 | 3.38459700  | -1.50087100 |
| C  | -10.28044900 | 4.20903700  | 0.74605900  |
| C  | -12.19697500 | 3.66442700  | -1.22964200 |
| C  | -11.63052000 | 4.46016100  | 0.97325500  |
| C  | -12.57647600 | 4.20643600  | -0.01293000 |
| H  | -12.94777500 | 3.45673000  | -1.98885700 |
| H  | -13.62346900 | 4.42482300  | 0.17811000  |
| H  | -11.95069700 | 4.86864800  | 1.92661200  |
| C  | -9.21430500  | 4.53423700  | 1.77816000  |
| C  | -9.75597500  | 4.55134300  | 3.20428200  |
| H  | -10.33030400 | 3.64912000  | 3.44012800  |
| H  | -10.40502200 | 5.41898100  | 3.37245600  |
| H  | -8.93043300  | 4.62872300  | 3.91855800  |
| C  | -8.53546800  | 5.87543500  | 1.46943800  |
| H  | -8.44320400  | 3.75040800  | 1.72116700  |
| H  | -7.79953400  | 6.11329600  | 2.24768800  |
| H  | -9.28094100  | 6.68041000  | 1.44323000  |
| H  | -8.02525200  | 5.87735400  | 0.50006400  |
| C  | -10.46701600 | 2.77575000  | -2.83598400 |
| C  | -11.17792000 | 1.43564800  | -3.04009300 |
| H  | -10.85580000 | 0.96986900  | -3.97768900 |
| H  | -12.26465100 | 1.57120300  | -3.09722900 |
| H  | -10.97214900 | 0.73829500  | -2.22133700 |
| C  | -10.77954800 | 3.72394600  | -3.99598700 |
| H  | -9.38404000  | 2.58211500  | -2.83885200 |
| H  | -10.50237900 | 3.26051200  | -4.95005800 |

|   |              |             |              |
|---|--------------|-------------|--------------|
| H | -10.24139200 | 4.67381200  | -3.90762600  |
| H | -11.85332900 | 3.94768200  | -4.03243800  |
| C | -4.30422500  | 9.89203300  | -6.12580300  |
| C | -3.49915400  | 9.83411700  | -4.98532600  |
| C | -2.59003400  | 8.93014700  | -7.47834700  |
| C | -1.76366500  | 8.86470500  | -6.36348200  |
| C | -2.21730100  | 9.30128100  | -5.12904600  |
| H | -0.76108800  | 8.45665800  | -6.45839100  |
| H | -1.57057500  | 9.23114700  | -4.25669800  |
| C | -3.97928600  | 10.28178500 | -3.61808200  |
| C | -4.10127200  | 9.08652800  | -2.66929800  |
| H | -4.75071600  | 8.29260300  | -3.07070000  |
| H | -4.51262300  | 9.41041000  | -1.70218000  |
| H | -3.11234700  | 8.64532700  | -2.47878700  |
| C | -3.05453600  | 11.34345900 | -3.02116300  |
| H | -4.97399900  | 10.73547700 | -3.71762200  |
| H | -3.44159800  | 11.68600300 | -2.05437200  |
| H | -2.96170200  | 12.21351600 | -3.67943800  |
| H | -2.04765500  | 10.94458800 | -2.84861600  |
| C | -3.88538300  | 9.42767700  | -7.37603700  |
| C | -4.85105100  | 9.40635200  | -8.54259500  |
| C | -4.59293500  | 8.24485100  | -9.49608800  |
| H | -5.40379400  | 8.17144100  | -10.22775900 |
| H | -4.53303400  | 7.29520300  | -8.95392100  |
| H | -3.66295200  | 8.38126000  | -10.06133000 |
| C | -4.82178400  | 10.73742200 | -9.29639700  |
| H | -5.85560100  | 9.26828600  | -8.11612900  |
| H | -5.08039100  | 11.57928000 | -8.64563100  |
| H | -5.52826000  | 10.72995300 | -10.13402000 |
| H | -3.81918900  | 10.92335700 | -9.70190000  |
| H | -2.23271700  | 8.55336400  | -8.43193300  |
| N | -6.66947400  | 3.52874000  | -1.89963100  |
| C | -5.47204900  | 4.03916800  | -2.48613700  |
| C | -5.14301400  | 3.66258900  | -3.79490900  |



|   |             |             |             |
|---|-------------|-------------|-------------|
| C | -4.71816400 | 4.95090900  | -1.74467000 |
| C | -4.04975700 | 4.29138600  | -4.38508100 |
| C | -3.31686800 | 5.24824800  | -3.69365800 |
| C | -3.63156500 | 5.55328200  | -2.37998700 |
| H | -3.78583200 | 4.05915000  | -5.41200400 |
| H | -2.49541000 | 5.75978300  | -4.18875400 |
| H | -3.03689000 | 6.28243700  | -1.83348400 |
| C | -5.05225000 | 5.32836600  | -0.31487200 |
| C | -5.32453900 | 6.83000500  | -0.22051600 |
| H | -4.39459300 | 7.39972600  | -0.35347900 |
| H | -5.74197200 | 7.09705200  | 0.75814700  |
| H | -6.02774400 | 7.14923700  | -1.00100600 |
| C | -3.92453200 | 4.91759000  | 0.63257500  |
| H | -5.96359500 | 4.79712800  | -0.00559200 |
| H | -2.98820500 | 5.42290700  | 0.36536200  |
| H | -3.74161300 | 3.83830300  | 0.60042200  |
| H | -4.16708100 | 5.19372700  | 1.66469400  |
| C | -6.01420600 | 2.68935600  | -4.56733800 |
| C | -7.22921900 | 3.42032000  | -5.15128900 |
| H | -7.88656800 | 3.81804800  | -4.37117600 |
| H | -7.81543500 | 2.74329500  | -5.78477300 |
| H | -6.90089300 | 4.27259800  | -5.76209700 |
| C | -5.25696800 | 1.97251000  | -5.68090800 |
| H | -6.38065200 | 1.92866200  | -3.86055800 |
| H | -5.02884000 | 2.65560300  | -6.50737000 |
| H | -5.87264900 | 1.16785000  | -6.09472000 |
| H | -4.31471500 | 1.53828500  | -5.32974300 |
| H | -5.24309300 | 12.44477400 | -6.41500500 |
| H | -7.63499800 | 12.80282600 | -5.05391200 |
| H | -8.31048600 | 1.60322400  | 0.15866300  |
| H | -5.87287900 | 1.67425600  | -1.18380600 |
| C | -8.72072800 | 10.46770900 | -4.15228700 |
| C | -8.70842700 | 10.31366500 | -2.75603300 |
| C | -9.88218900 | 10.34942900 | -4.91771700 |

|   |              |             |             |
|---|--------------|-------------|-------------|
| C | -9.92842700  | 10.08726700 | -2.12713300 |
| C | -11.08038300 | 10.11260500 | -4.24030300 |
| C | -11.10435000 | 9.99562700  | -2.86178300 |
| H | -9.95940300  | 9.92932800  | -1.05419100 |
| H | -11.99837800 | 9.99192000  | -4.81046100 |
| H | -12.04236000 | 9.79686200  | -2.35146200 |
| C | -9.85652800  | 10.34175200 | -6.43340200 |
| C | -10.05657400 | 8.90410500  | -6.92243100 |
| H | -9.30014700  | 8.23307600  | -6.49813500 |
| H | -9.99824700  | 8.84987900  | -8.01530700 |
| H | -11.04312600 | 8.53292000  | -6.61624300 |
| C | -10.90668000 | 11.27142300 | -7.03881800 |
| H | -8.86858100  | 10.67938100 | -6.77243200 |
| H | -11.92261700 | 10.93639600 | -6.79968200 |
| H | -10.82080400 | 11.28438400 | -8.13051300 |
| H | -10.80002900 | 12.29888400 | -6.67591000 |
| C | -7.39312800  | 10.27303800 | -2.00070200 |
| C | -6.78650600  | 11.66302000 | -1.79324500 |
| H | -5.79899600  | 11.57336300 | -1.31963200 |
| H | -7.42016500  | 12.26596300 | -1.13073600 |
| H | -6.65639900  | 12.21349700 | -2.73056800 |
| C | -7.49555400  | 9.55281300  | -0.66095000 |
| H | -6.70350400  | 9.68559000  | -2.62619600 |
| H | -6.49450400  | 9.44680200  | -0.22548300 |
| H | -7.93158000  | 8.55073100  | -0.77082500 |
| H | -8.09978800  | 10.11930900 | 0.05918800  |
| H | -8.61430600  | 7.97126500  | -3.71351800 |
| H | -6.40428300  | 5.89740000  | -3.71836600 |

**51. NHC\_Full\_H\_Cl (twisted)-singlet:**

|    |              |            |             |
|----|--------------|------------|-------------|
| N  | -9.50183700  | 4.75543600 | -0.35734900 |
| C  | -10.61674000 | 6.63026300 | -0.64615300 |
| C  | -10.68463100 | 5.41107500 | -0.07861500 |
| C  | -8.69719600  | 5.53379200 | -1.17441600 |
| C  | -6.49074200  | 6.26336300 | -2.56785300 |
| C  | -6.48157400  | 6.21519200 | -3.91202600 |
| N  | -3.45454100  | 5.93406900 | -5.11302100 |
| N  | -3.58113100  | 7.79541600 | -6.24997200 |
| C  | -2.27023000  | 6.08247100 | -5.80357900 |
| C  | -2.33816000  | 7.24032500 | -6.49058600 |
| B  | -5.71209700  | 7.16657400 | -4.87148500 |
| B  | -7.27826800  | 5.28729900 | -1.63895900 |
| Cl | -6.41966100  | 3.80090100 | -1.03618900 |

|    |              |             |             |
|----|--------------|-------------|-------------|
| C  | -4.31120600  | 6.98051000  | -5.39558300 |
| Cl | -6.75250000  | 8.42799800  | -5.69403400 |
| C  | -9.38625100  | 3.33493900  | -0.23020500 |
| C  | -8.83683100  | 2.81482000  | 0.94567500  |
| C  | -9.79254400  | 2.53255500  | -1.29945900 |
| C  | -8.75519900  | 1.43086100  | 1.06306000  |
| C  | -9.67052600  | 1.15073000  | -1.14537900 |
| C  | -9.17366600  | 0.60560000  | 0.02711300  |
| H  | -8.33131500  | 0.99138200  | 1.96117800  |
| H  | -9.09067700  | -0.47289600 | 0.12914000  |
| H  | -9.96188400  | 0.49770300  | -1.96489000 |
| C  | -10.27032800 | 3.10559800  | -2.62070900 |
| C  | -11.59800800 | 2.49600700  | -3.06946300 |
| H  | -12.37789200 | 2.61724700  | -2.31074900 |
| H  | -11.49775900 | 1.42475300  | -3.27988400 |
| H  | -11.94069900 | 2.97701600  | -3.99245400 |
| C  | -9.19477700  | 2.88778300  | -3.69156600 |
| H  | -10.42754200 | 4.18788500  | -2.50534100 |
| H  | -9.50313100  | 3.32660400  | -4.64877300 |
| H  | -9.02863900  | 1.81389800  | -3.84906200 |
| H  | -8.23514100  | 3.33472200  | -3.39779700 |
| C  | -8.29748200  | 3.74359200  | 2.01471800  |
| C  | -9.38485800  | 4.08757000  | 3.03439400  |
| H  | -9.00061600  | 4.76390200  | 3.80615000  |
| H  | -9.74024600  | 3.17560000  | 3.53084900  |
| H  | -10.24778500 | 4.56948300  | 2.56308200  |
| C  | -7.06911600  | 3.17181000  | 2.71565000  |
| H  | -7.98737500  | 4.66964300  | 1.50626600  |
| H  | -6.61594100  | 3.93155900  | 3.36056800  |
| H  | -6.31749600  | 2.84317500  | 1.99032100  |
| H  | -7.32701100  | 2.32054100  | 3.35710000  |
| C  | -3.82311400  | 9.19854300  | -6.40523500 |
| C  | -4.42870800  | 9.66040600  | -7.57755500 |
| C  | -3.74813100  | 11.40387800 | -5.49319400 |

|   |             |             |              |
|---|-------------|-------------|--------------|
| C | -4.32336600 | 11.89259400 | -6.65474600  |
| C | -4.65709100 | 11.02843500 | -7.68969900  |
| H | -4.52529800 | 12.95563300 | -6.75297100  |
| H | -5.13108000 | 11.42175100 | -8.58399700  |
| C | -4.85663100 | 8.68623100  | -8.65525800  |
| C | -6.12571400 | 9.12961500  | -9.37546000  |
| H | -6.91936400 | 9.37514700  | -8.66217700  |
| H | -6.48681900 | 8.32896400  | -10.02887300 |
| H | -5.94732200 | 10.00517200 | -10.01133200 |
| C | -3.72137600 | 8.46193000  | -9.65630800  |
| H | -5.07459700 | 7.73247600  | -8.15377700  |
| H | -4.01840900 | 7.75030300  | -10.43482900 |
| H | -2.82093700 | 8.07265600  | -9.16943300  |
| H | -3.45450900 | 9.40704900  | -10.14612200 |
| C | -3.47655100 | 10.04296300 | -5.34667300  |
| C | -2.84739300 | 9.53338300  | -4.06401500  |
| C | -3.81119600 | 9.68316900  | -2.88360200  |
| H | -3.36276800 | 9.25676700  | -1.97375600  |
| H | -4.76774800 | 9.17231200  | -3.07300700  |
| H | -4.02625100 | 10.74224500 | -2.68529000  |
| C | -1.52645200 | 10.24623300 | -3.77188400  |
| H | -2.62424400 | 8.46473400  | -4.17950600  |
| H | -0.82037200 | 10.14067000 | -4.60216700  |
| H | -1.05909600 | 9.83240800  | -2.87099600  |
| H | -1.68058500 | 11.31770500 | -3.59760700  |
| H | -3.50343100 | 12.08434000 | -4.68026600  |
| N | -9.40304500 | 6.72266300  | -1.29831200  |
| C | -8.96017200 | 7.93624000  | -1.91488600  |
| C | -7.93483800 | 8.68069100  | -1.31347800  |
| C | -9.60901400 | 8.35119000  | -3.08819900  |
| C | -7.53672100 | 9.85579500  | -1.95166100  |
| C | -8.16973400 | 10.29309700 | -3.10436700  |
| C | -9.20471200 | 9.55594300  | -3.65716700  |
| H | -6.72670300 | 10.44521800 | -1.53240500  |

|   |              |             |             |
|---|--------------|-------------|-------------|
| H | -7.84151000  | 11.20865100 | -3.58762500 |
| H | -9.67209300  | 9.90121800  | -4.57315900 |
| C | -10.63984000 | 7.46563400  | -3.76754100 |
| C | -9.92554100  | 6.30815000  | -4.47218500 |
| H | -9.26302200  | 6.69908300  | -5.25577300 |
| H | -10.65270700 | 5.62654200  | -4.93416000 |
| H | -9.30288500  | 5.73394600  | -3.77897300 |
| C | -11.52258200 | 8.21090300  | -4.76219200 |
| H | -11.29700500 | 7.03337400  | -2.99905900 |
| H | -10.94922200 | 8.52421700  | -5.64265700 |
| H | -11.98502500 | 9.10154300  | -4.32316200 |
| H | -12.32113200 | 7.55245500  | -5.11812600 |
| C | -7.31840400  | 8.26025100  | 0.00867300  |
| C | -5.93887900  | 8.86349700  | 0.25150600  |
| H | -5.27600300  | 8.71889700  | -0.61006900 |
| H | -5.47162100  | 8.39088800  | 1.12171800  |
| H | -5.99605500  | 9.93955900  | 0.45892200  |
| C | -8.25774300  | 8.62082900  | 1.16406600  |
| H | -7.19733500  | 7.16626900  | 0.00099000  |
| H | -8.41846600  | 9.70582700  | 1.19692800  |
| H | -7.82602100  | 8.31503000  | 2.12393800  |
| H | -9.23523100  | 8.13770400  | 1.06559200  |
| H | -1.61476000  | 7.74505500  | -7.11012900 |
| H | -1.49165200  | 5.34000200  | -5.72604900 |
| H | -11.46464400 | 4.92908200  | 0.48818400  |
| H | -11.29800600 | 7.46610000  | -0.62973300 |
| C | -3.69111500  | 4.79539500  | -4.27682700 |
| C | -4.22289300  | 3.64234400  | -4.85266900 |
| C | -3.31166000  | 4.86476800  | -2.92862600 |
| C | -4.24331700  | 2.48318900  | -4.07441000 |
| C | -3.33065000  | 3.68132000  | -2.19927200 |
| C | -3.76250700  | 2.49407500  | -2.77661000 |
| H | -4.63709600  | 1.56305300  | -4.49864400 |
| H | -3.05421500  | 3.69465300  | -1.14914500 |

|   |             |            |             |
|---|-------------|------------|-------------|
| H | -3.77765400 | 1.58244900 | -2.18624300 |
| C | -2.98047200 | 6.20126700 | -2.29041600 |
| C | -3.35926700 | 6.25613600 | -0.81121600 |
| H | -4.38585800 | 5.91225300 | -0.63307200 |
| H | -3.26937300 | 7.28728000 | -0.44699900 |
| H | -2.68554300 | 5.64358800 | -0.19902300 |
| C | -1.51110000 | 6.59656200 | -2.45211800 |
| H | -3.59850500 | 6.94932600 | -2.81177800 |
| H | -0.86190300 | 5.88553400 | -1.92552800 |
| H | -1.33985200 | 7.59101500 | -2.01702500 |
| H | -1.19554000 | 6.63191200 | -3.50005500 |
| C | -4.75458800 | 3.63519900 | -6.27112200 |
| C | -3.74583000 | 2.98252100 | -7.21786900 |
| H | -4.11975500 | 2.96912500 | -8.24773700 |
| H | -3.55779200 | 1.94493800 | -6.91240100 |
| H | -2.78611400 | 3.51153400 | -7.21129400 |
| C | -6.10846900 | 2.93099500 | -6.35610700 |
| H | -4.90488400 | 4.67837400 | -6.58183700 |
| H | -6.54310400 | 3.05912700 | -7.35300400 |
| H | -6.81321300 | 3.33090100 | -5.61792800 |
| H | -6.01347500 | 1.85304100 | -6.18022900 |
| H | -5.86133900 | 7.04846600 | -2.11407800 |
| H | -7.11775200 | 5.44119400 | -4.37611900 |

**52. NHC\_Full\_H\_Cl (twisted)-triplet:**

|    |              |            |             |
|----|--------------|------------|-------------|
| N  | -9.50184800  | 4.75611400 | -0.36500600 |
| C  | -10.61326600 | 6.63430700 | -0.64271100 |
| C  | -10.68238700 | 5.41284100 | -0.08032600 |
| C  | -8.69715700  | 5.53571400 | -1.18111500 |
| C  | -6.48906400  | 6.27167800 | -2.56990100 |
| C  | -6.48264200  | 6.21248800 | -3.91420100 |
| N  | -3.45632900  | 5.93156900 | -5.10554600 |
| N  | -3.57845800  | 7.79209700 | -6.24523900 |
| C  | -2.26997600  | 6.07901600 | -5.79307400 |
| C  | -2.33524200  | 7.23599000 | -6.48170300 |
| B  | -5.71422900  | 7.16493400 | -4.87373000 |
| B  | -7.27583500  | 5.29377700 | -1.64123100 |
| Cl | -6.43145600  | 3.77752100 | -1.09577900 |
| C  | -4.31153200  | 6.97909500 | -5.39117100 |
| Cl | -6.74708200  | 8.44542400 | -5.67429800 |
| C  | -9.38902000  | 3.33502500 | -0.24255500 |
| C  | -8.82436700  | 2.81077700 | 0.92410900  |
| C  | -9.81173700  | 2.53691200 | -1.30841000 |



|   |              |             |             |
|---|--------------|-------------|-------------|
| C | -8.74495000  | 1.42636200  | 1.03700800  |
| C | -9.69234000  | 1.15430300  | -1.15912900 |
| C | -9.18104000  | 0.60499700  | 0.00517100  |
| H | -8.30911200  | 0.98327600  | 1.92756200  |
| H | -9.09990300  | -0.47399600 | 0.10342400  |
| H | -9.99600300  | 0.50395900  | -1.97626700 |
| C | -10.29995200 | 3.11526500  | -2.62367200 |
| C | -11.63166000 | 2.50863200  | -3.06422000 |
| H | -12.40530000 | 2.62691800  | -2.29867800 |
| H | -11.53381500 | 1.43826600  | -3.28017400 |
| H | -11.98159100 | 2.99372500  | -3.98228600 |
| C | -9.23224200  | 2.89938500  | -3.70267200 |
| H | -10.45429100 | 4.19773100  | -2.50410800 |
| H | -9.55000000  | 3.33384700  | -4.65860100 |
| H | -9.06173900  | 1.82592200  | -3.85800100 |
| H | -8.27296200  | 3.35188200  | -3.41699900 |
| C | -8.26670300  | 3.73677700  | 1.98618500  |
| C | -9.34120100  | 4.09207000  | 3.01556400  |
| H | -8.94409500  | 4.76767900  | 3.78142100  |
| H | -9.69872200  | 3.18439200  | 3.51826800  |
| H | -10.20490700 | 4.57938800  | 2.55123300  |
| C | -7.03605600  | 3.15642100  | 2.67573300  |
| H | -7.95396700  | 4.65938200  | 1.47283500  |
| H | -6.57072800  | 3.91343200  | 3.31516800  |
| H | -6.29423000  | 2.82122200  | 1.94329000  |
| H | -7.29411300  | 2.30788200  | 3.32075200  |
| C | -3.81991800  | 9.19480100  | -6.40429000 |
| C | -4.42712000  | 9.65303700  | -7.57721900 |
| C | -3.74624800  | 11.40248400 | -5.49798100 |
| C | -4.32167600  | 11.88780200 | -6.66083400 |
| C | -4.65603200  | 11.02063300 | -7.69311600 |
| H | -4.52408400  | 12.95048700 | -6.76190200 |
| H | -5.13146800  | 11.41133400 | -8.58776100 |
| C | -4.85871300  | 8.67444200  | -8.64951300 |

|   |              |             |              |
|---|--------------|-------------|--------------|
| C | -6.12459200  | 9.11969600  | -9.37404500  |
| H | -6.91796400  | 9.37345800  | -8.66330000  |
| H | -6.48878600  | 8.31685000  | -10.02302400 |
| H | -5.94110300  | 9.99050600  | -10.01498500 |
| C | -3.72372100  | 8.43695200  | -9.64779400  |
| H | -5.08252400  | 7.72512800  | -8.14194300  |
| H | -4.02404700  | 7.72167800  | -10.42169800 |
| H | -2.82606200  | 8.04583600  | -9.15736100  |
| H | -3.45110900  | 9.37714000  | -10.14385600 |
| C | -3.47426400  | 10.04205400 | -5.34780400  |
| C | -2.84935500  | 9.53511100  | -4.06207100  |
| C | -3.81935400  | 9.68383400  | -2.88643700  |
| H | -3.37427400  | 9.25923400  | -1.97411200  |
| H | -4.77424400  | 9.17121300  | -3.07965000  |
| H | -4.03753600  | 10.74268500 | -2.69026200  |
| C | -1.53162700  | 10.25124200 | -3.76375300  |
| H | -2.62334600  | 8.46682200  | -4.17562000  |
| H | -0.82129800  | 10.14735200 | -4.59058500  |
| H | -1.06758500  | 9.83870800  | -2.86057200  |
| H | -1.68918700  | 11.32233300 | -3.59024200  |
| H | -3.50255600  | 12.08519000 | -4.68664600  |
| N | -9.40139000  | 6.72684100  | -1.29797700  |
| C | -8.96195100  | 7.94254900  | -1.91319200  |
| C | -7.93952100  | 8.68959100  | -1.31032100  |
| C | -9.61368700  | 8.35839400  | -3.08447000  |
| C | -7.54663400  | 9.86830400  | -1.94515500  |
| C | -8.18282100  | 10.30658500 | -3.09565000  |
| C | -9.21498900  | 9.56669600  | -3.65002800  |
| H | -6.73838100  | 10.45953100 | -1.52502200  |
| H | -7.85891500  | 11.22506600 | -3.57627500  |
| H | -9.68490400  | 9.91299100  | -4.56434900  |
| C | -10.64164700 | 7.47074100  | -3.76528000  |
| C | -9.92343000  | 6.31858700  | -4.47457900  |
| H | -9.25951000  | 6.71465200  | -5.25441300  |

|   |              |            |             |
|---|--------------|------------|-------------|
| H | -10.64859000 | 5.63875300 | -4.94211700 |
| H | -9.30198800  | 5.74110400 | -3.78293400 |
| C | -11.52888200 | 8.21560700 | -4.75622200 |
| H | -11.29580600 | 7.03320600 | -2.99711000 |
| H | -10.95821700 | 8.53384600 | -5.63666300 |
| H | -11.99407700 | 9.10309700 | -4.31373200 |
| H | -12.32544500 | 7.55514900 | -5.11286300 |
| C | -7.32045000  | 8.26679500 | 0.00966100  |
| C | -5.94215000  | 8.87287500 | 0.25186600  |
| H | -5.28110800  | 8.73363900 | -0.61191200 |
| H | -5.47142400  | 8.39822200 | 1.11910300  |
| H | -6.00194800  | 9.94796600 | 0.46352700  |
| C | -8.25853100  | 8.62178300 | 1.16777300  |
| H | -7.19682300  | 7.17298400 | -0.00173900 |
| H | -8.42138600  | 9.70635100 | 1.20430400  |
| H | -7.82435600  | 8.31392400 | 2.12588800  |
| H | -9.23516200  | 8.13692900 | 1.06979600  |
| H | -1.60989000  | 7.73932700 | -7.10010100 |
| H | -1.49192900  | 5.33631400 | -5.71227100 |
| H | -11.46156700 | 4.92998400 | 0.48692100  |
| H | -11.29291800 | 7.47136800 | -0.62170800 |
| C | -3.68857300  | 4.79362200 | -4.26652700 |
| C | -4.20860300  | 3.63458400 | -4.84116200 |
| C | -3.30709800  | 4.86639900 | -2.91925000 |
| C | -4.21167600  | 2.47455200 | -4.06411100 |
| C | -3.30898500  | 3.68221800 | -2.19060400 |
| C | -3.72614600  | 2.48985100 | -2.76804800 |
| H | -4.59566500  | 1.55012500 | -4.48806300 |
| H | -3.02829500  | 3.69831000 | -1.14159400 |
| H | -3.72610800  | 1.57706000 | -2.17927000 |
| C | -2.98777500  | 6.20569000 | -2.28150700 |
| C | -3.37802200  | 6.26011400 | -0.80524100 |
| H | -4.40461700  | 5.91154500 | -0.63520100 |
| H | -3.29577400  | 7.29188800 | -0.44107700 |

|   |             |            |             |
|---|-------------|------------|-------------|
| H | -2.70644800 | 5.65110500 | -0.18725600 |
| C | -1.51901700 | 6.60664000 | -2.43428700 |
| H | -3.60538300 | 6.95009700 | -2.80840400 |
| H | -0.87040100 | 5.89892200 | -1.90248700 |
| H | -1.35393700 | 7.60261100 | -2.00031000 |
| H | -1.19755300 | 6.64064100 | -3.48062700 |
| C | -4.74744600 | 3.62312400 | -6.25680000 |
| C | -3.73926500 | 2.97872800 | -7.20968600 |
| H | -4.11944400 | 2.96198200 | -8.23721300 |
| H | -3.54077300 | 1.94277200 | -6.90528100 |
| H | -2.78397900 | 3.51572200 | -7.20920000 |
| C | -6.09605500 | 2.90775000 | -6.33306100 |
| H | -4.90814400 | 4.66522600 | -6.56612500 |
| H | -6.53869200 | 3.03262800 | -7.32685000 |
| H | -6.79889600 | 3.30124700 | -5.58959500 |
| H | -5.99075000 | 1.83059500 | -6.15812200 |
| H | -5.87206500 | 7.06941800 | -2.12281900 |
| H | -7.10790900 | 5.42619900 | -4.37149600 |

**53. NHC\_Full\_H\_CI (planar)-singlet:**

|    |              |             |             |
|----|--------------|-------------|-------------|
| N  | -8.74363500  | 3.47600900  | -0.95959200 |
| C  | -6.89792400  | 2.30068400  | -1.07689800 |
| C  | -8.14204700  | 2.30096800  | -0.56032600 |
| C  | -7.90323200  | 4.21701900  | -1.75466700 |
| C  | -7.10680800  | 6.33907900  | -3.14930800 |
| C  | -7.23334800  | 7.63921700  | -3.66710000 |
| N  | -7.51263500  | 10.60767400 | -4.79110500 |
| N  | -5.62353500  | 10.51900900 | -5.84956900 |
| C  | -7.32589500  | 11.82984400 | -5.40358900 |
| C  | -6.15124900  | 11.77747800 | -6.05893600 |
| B  | -6.24747700  | 8.33091200  | -4.51960700 |
| B  | -8.09661000  | 5.65276500  | -2.29708000 |
| Cl | -9.61108600  | 6.57196300  | -1.79231100 |
| C  | -6.45408500  | 9.76428400  | -5.05369500 |
| Cl | -4.70171700  | 7.44400900  | -4.98531700 |
| C  | -10.14317300 | 3.71247400  | -0.78953800 |
| C  | -10.98276900 | 3.52993500  | -1.89052200 |
| C  | -10.60210700 | 4.12209200  | 0.46951900  |
| C  | -12.33445100 | 3.82862300  | -1.71640500 |
| C  | -11.96044000 | 4.39779500  | 0.59192500  |
| C  | -12.81545900 | 4.26767000  | -0.49578000 |
| H  | -13.01406400 | 3.71592600  | -2.55794100 |
| H  | -13.87008100 | 4.50227400  | -0.38199500 |

|   |              |             |             |
|---|--------------|-------------|-------------|
| H | -12.35971100 | 4.72853000  | 1.54505000  |
| C | -9.63773500  | 4.31431600  | 1.62812700  |
| C | -10.33174200 | 4.31554100  | 2.98647800  |
| H | -10.98919900 | 3.44965800  | 3.11893000  |
| H | -10.93300400 | 5.22201800  | 3.12470500  |
| H | -9.58511100  | 4.30342600  | 3.78637200  |
| C | -8.82667800  | 5.60561200  | 1.46661000  |
| H | -8.92934400  | 3.47235300  | 1.62092700  |
| H | -8.18401000  | 5.75620400  | 2.34171000  |
| H | -9.49984500  | 6.46657100  | 1.37930000  |
| H | -8.19453700  | 5.60186100  | 0.57279100  |
| C | -10.50019600 | 3.03332900  | -3.24244400 |
| C | -11.22093800 | 1.74013800  | -3.63047600 |
| H | -10.82211200 | 1.35336200  | -4.57539300 |
| H | -12.29423500 | 1.91369700  | -3.77387300 |
| H | -11.10731600 | 0.96435200  | -2.86621500 |
| C | -10.70321900 | 4.09672900  | -4.32478500 |
| H | -9.42523500  | 2.80718600  | -3.18274300 |
| H | -10.40717600 | 3.70510600  | -5.30447700 |
| H | -10.11961900 | 5.00125800  | -4.12422200 |
| H | -11.76054400 | 4.38294500  | -4.38724000 |
| C | -4.22172700  | 10.28479700 | -6.05008500 |
| C | -3.34766100  | 10.71184300 | -5.04869100 |
| C | -2.43120800  | 9.44571800  | -7.37738400 |
| C | -1.53162300  | 9.88225800  | -6.41259400 |
| C | -1.98469400  | 10.49578000 | -5.25660900 |
| H | -0.46691600  | 9.72087500  | -6.55681200 |
| H | -1.27577800  | 10.79827900 | -4.48916800 |
| C | -3.82935500  | 11.29319800 | -3.73168700 |
| C | -3.61453300  | 10.27214100 | -2.60874700 |
| H | -4.13956500  | 9.32962300  | -2.81078500 |
| H | -3.97317200  | 10.67273600 | -1.65158500 |
| H | -2.54641100  | 10.04494100 | -2.49807100 |
| C | -3.13956300  | 12.61412900 | -3.39500300 |

|   |             |             |             |
|---|-------------|-------------|-------------|
| H | -4.90682100 | 11.49878600 | -3.80104000 |
| H | -3.55768100 | 13.03260700 | -2.47198400 |
| H | -3.26625900 | 13.35321300 | -4.19294600 |
| H | -2.06409400 | 12.47574300 | -3.23281800 |
| C | -3.79965600 | 9.62801300  | -7.20792000 |
| C | -4.81797800 | 9.08914300  | -8.19102500 |
| C | -4.33214500 | 7.83574400  | -8.90946000 |
| H | -5.14973600 | 7.39334400  | -9.48718400 |
| H | -3.97234800 | 7.08770900  | -8.19510700 |
| H | -3.52413000 | 8.05983500  | -9.61650900 |
| C | -5.21913600 | 10.16969500 | -9.19752100 |
| H | -5.70666400 | 8.80805500  | -7.60646700 |
| H | -5.63404500 | 11.05388400 | -8.70166200 |
| H | -5.97139600 | 9.79263800  | -9.89927800 |
| H | -4.34526100 | 10.49026400 | -9.77858500 |
| H | -2.06251500 | 8.92998700  | -8.25864300 |
| N | -6.75473700 | 3.46117100  | -1.80408800 |
| C | -5.55834400 | 3.71837300  | -2.54881300 |
| C | -5.40970900 | 3.07080600  | -3.78141300 |
| C | -4.59742400 | 4.58977200  | -2.02711600 |
| C | -4.23470200 | 3.30754100  | -4.49388700 |
| C | -3.25321000 | 4.14610000  | -3.98882500 |
| C | -3.43389300 | 4.77899100  | -2.76958000 |
| H | -4.09271000 | 2.83558700  | -5.46149100 |
| H | -2.34742200 | 4.32404900  | -4.56111300 |
| H | -2.67113200 | 5.45634100  | -2.39488700 |
| C | -4.79736700 | 5.34320400  | -0.72765200 |
| C | -4.48450400 | 6.83369800  | -0.89030500 |
| H | -3.41256600 | 7.00415200  | -1.05143600 |
| H | -4.76682600 | 7.37620100  | 0.01939400  |
| H | -5.03355900 | 7.26923600  | -1.73569600 |
| C | -3.93765800 | 4.72191800  | 0.37471400  |
| H | -5.85330500 | 5.26010700  | -0.43878000 |
| H | -2.87502700 | 4.77163600  | 0.10363500  |

|   |              |             |             |
|---|--------------|-------------|-------------|
| H | -4.19031000  | 3.66756000  | 0.53709800  |
| H | -4.06803200  | 5.25522300  | 1.32290800  |
| C | -6.52425300  | 2.23466600  | -4.38177200 |
| C | -7.41689000  | 3.13548900  | -5.24143600 |
| H | -7.80461300  | 3.98807100  | -4.67035500 |
| H | -8.26431100  | 2.56659800  | -5.64664600 |
| H | -6.84025900  | 3.53906000  | -6.08377000 |
| C | -6.01401100  | 1.05326400  | -5.20296300 |
| H | -7.13998900  | 1.83056800  | -3.56514700 |
| H | -5.53694100  | 1.38626700  | -6.13171800 |
| H | -6.84916000  | 0.40673500  | -5.49097000 |
| H | -5.28809000  | 0.44870800  | -4.64909000 |
| H | -5.61587900  | 12.51135600 | -6.63918500 |
| H | -8.06727300  | 12.60747200 | -5.31077900 |
| H | -8.67279400  | 1.58244700  | 0.04252400  |
| H | -6.09260400  | 1.58638200  | -1.01768300 |
| C | -8.64109700  | 10.40114200 | -3.92735900 |
| C | -8.44594100  | 10.45198100 | -2.54141900 |
| C | -9.89628100  | 10.18832000 | -4.50842600 |
| C | -9.56666400  | 10.31184300 | -1.72806300 |
| C | -10.98682300 | 10.04880800 | -3.64942400 |
| C | -10.82550200 | 10.11854500 | -2.27511400 |
| H | -9.44484700  | 10.33142100 | -0.64913500 |
| H | -11.97423800 | 9.87298000  | -4.06397400 |
| H | -11.68615100 | 9.99860400  | -1.62360500 |
| C | -10.04738500 | 9.99240900  | -6.00448400 |
| C | -9.69283700  | 8.54115700  | -6.34693300 |
| H | -8.67233400  | 8.28570700  | -6.04282100 |
| H | -9.79793400  | 8.35714900  | -7.42255200 |
| H | -10.36938900 | 7.86091300  | -5.81346000 |
| C | -11.44110700 | 10.33112400 | -6.52397800 |
| H | -9.33038400  | 10.64934800 | -6.51698800 |
| H | -12.18071900 | 9.59218400  | -6.19449900 |
| H | -11.44593300 | 10.31731200 | -7.61836100 |



|   |              |             |             |
|---|--------------|-------------|-------------|
| H | -11.77931200 | 11.31899400 | -6.19287400 |
| C | -7.06613200  | 10.60391000 | -1.93575700 |
| C | -6.75703400  | 12.07408100 | -1.65063500 |
| H | -5.74130100  | 12.18894700 | -1.24859400 |
| H | -7.45961500  | 12.49134200 | -0.91771800 |
| H | -6.82746400  | 12.67825700 | -2.56564300 |
| C | -6.88108900  | 9.72181700  | -0.70283400 |
| H | -6.34149500  | 10.24337700 | -2.67044100 |
| H | -5.82257400  | 9.70564200  | -0.41498400 |
| H | -7.19370700  | 8.68845900  | -0.91427900 |
| H | -7.44798600  | 10.08761400 | 0.16204600  |
| H | -8.16778500  | 8.12999700  | -3.39977000 |
| H | -6.20736300  | 5.82056400  | -3.47800200 |

**54. NHC\_Full\_H\_CI (planar)-triplet:**

|    |              |             |             |
|----|--------------|-------------|-------------|
| N  | -9.00483400  | 3.29564700  | -1.43855000 |
| C  | -7.16455100  | 2.09711700  | -1.57634000 |
| C  | -8.42478200  | 2.09009300  | -1.10122600 |
| C  | -8.10528300  | 4.09276900  | -2.12995800 |
| C  | -7.18922400  | 6.29234100  | -3.40031600 |
| C  | -7.31578300  | 7.56665200  | -3.86874800 |
| N  | -7.49796900  | 10.59637800 | -4.95136100 |
| N  | -5.49899200  | 10.56283400 | -5.83078600 |
| C  | -7.26517900  | 11.83592000 | -5.51170800 |
| C  | -6.02963800  | 11.81785100 | -6.04757200 |
| B  | -6.23069800  | 8.33904800  | -4.62558900 |
| B  | -8.27411600  | 5.51982100  | -2.64350400 |
| Cl | -9.87312200  | 6.36376900  | -2.40072500 |
| C  | -6.39861700  | 9.76596400  | -5.13944900 |
| Cl | -4.67020200  | 7.45621500  | -4.96111300 |
| C  | -10.14576600 | 3.78183100  | -0.72118700 |
| C  | -11.40686100 | 3.69441400  | -1.31671400 |
| C  | -9.93341500  | 4.35538600  | 0.53398500  |
| C  | -12.49688600 | 4.15281600  | -0.58407000 |
| C  | -11.05484300 | 4.81216400  | 1.22811700  |
| C  | -12.32243100 | 4.69948100  | 0.68145100  |
| H  | -13.49210300 | 4.10940900  | -1.01577800 |
| H  | -13.18422300 | 5.06095300  | 1.23566800  |
| H  | -10.92366000 | 5.27631300  | 2.20324000  |
| C  | -8.54652100  | 4.57937500  | 1.10735800  |
| C  | -8.39968800  | 3.99804600  | 2.51245100  |
| H  | -8.62971200  | 2.92769700  | 2.53363000  |
| H  | -9.06535500  | 4.49884400  | 3.22554400  |

|   |              |             |             |
|---|--------------|-------------|-------------|
| H | -7.37283700  | 4.13377200  | 2.87202900  |
| C | -8.22935200  | 6.07846400  | 1.10710000  |
| H | -7.80851000  | 4.07719700  | 0.46706800  |
| H | -7.21845900  | 6.26128900  | 1.49367100  |
| H | -8.93600100  | 6.62140000  | 1.74767500  |
| H | -8.29876700  | 6.50238300  | 0.09702600  |
| C | -11.54211200 | 3.17248900  | -2.73227400 |
| C | -11.65275200 | 1.64635500  | -2.73669200 |
| H | -11.72980700 | 1.26137900  | -3.75967100 |
| H | -12.54845400 | 1.32901700  | -2.18792500 |
| H | -10.78494600 | 1.17470500  | -2.26344600 |
| C | -12.71386400 | 3.79942400  | -3.47887500 |
| H | -10.62172200 | 3.45691700  | -3.26449400 |
| H | -12.68102600 | 3.51640600  | -4.53568300 |
| H | -12.68325000 | 4.89235800  | -3.41507900 |
| H | -13.67794600 | 3.45562300  | -3.08466100 |
| C | -4.08229900  | 10.35321000 | -5.87105100 |
| C | -3.33122400  | 10.74847400 | -4.76222600 |
| C | -2.14021900  | 9.57049700  | -7.01084700 |
| C | -1.36097800  | 9.98355800  | -5.93698200 |
| C | -1.95060300  | 10.55251800 | -4.82028500 |
| H | -0.28462500  | 9.83804800  | -5.96492900 |
| H | -1.33706000  | 10.83735200 | -3.96828600 |
| C | -3.96722300  | 11.27994500 | -3.49117400 |
| C | -3.83048700  | 10.23818500 | -2.37577300 |
| H | -4.29163400  | 9.28321100  | -2.65929800 |
| H | -4.30553900  | 10.59421400 | -1.45253500 |
| H | -2.77245600  | 10.04708900 | -2.15542200 |
| C | -3.36505600  | 12.61531200 | -3.05736000 |
| H | -5.03837800  | 11.44700900 | -3.66931600 |
| H | -3.88314700  | 12.99239500 | -2.16771200 |
| H | -3.44702800  | 13.37101800 | -3.84556500 |
| H | -2.30414900  | 12.51236800 | -2.79981300 |
| C | -3.52127400  | 9.73594000  | -6.99196700 |

|   |             |             |             |
|---|-------------|-------------|-------------|
| C | -4.41568600 | 9.22289200  | -8.10159400 |
| C | -3.83880100 | 7.99750000  | -8.80102200 |
| H | -4.58056200 | 7.57013600  | -9.48308400 |
| H | -3.55465400 | 7.22668600  | -8.07666500 |
| H | -2.95750600 | 8.25012300  | -9.40311300 |
| C | -4.71160300 | 10.33325100 | -9.11197700 |
| H | -5.36281700 | 8.91838900  | -7.63095800 |
| H | -5.18826500 | 11.19757400 | -8.63725300 |
| H | -5.37653800 | 9.97491100  | -9.90575200 |
| H | -3.78118700 | 10.67810700 | -9.58051000 |
| H | -1.66744000 | 9.08774000  | -7.86070300 |
| N | -6.95683900 | 3.31170900  | -2.19799000 |
| C | -5.66927600 | 3.65372600  | -2.72574000 |
| C | -5.26749500 | 3.06522900  | -3.93188600 |
| C | -4.85846800 | 4.55293200  | -2.01945100 |
| C | -3.99247300 | 3.37092000  | -4.40729000 |
| C | -3.16242400 | 4.23782300  | -3.71385900 |
| C | -3.59679600 | 4.83094400  | -2.53864100 |
| H | -3.65158700 | 2.93741300  | -5.34201000 |
| H | -2.17755300 | 4.47330900  | -4.10657500 |
| H | -2.95384400 | 5.53875800  | -2.02426200 |
| C | -5.34524800 | 5.23350600  | -0.75680100 |
| C | -4.86271200 | 6.67815900  | -0.64637900 |
| H | -3.78823700 | 6.74795200  | -0.43736900 |
| H | -5.38744300 | 7.18139000  | 0.17526000  |
| H | -5.07570800 | 7.22995400  | -1.57473200 |
| C | -4.97253900 | 4.40504300  | 0.47421700  |
| H | -6.43788200 | 5.28447300  | -0.80825400 |
| H | -3.88290100 | 4.31625300  | 0.57175800  |
| H | -5.38828100 | 3.39036400  | 0.40913400  |
| H | -5.35763100 | 4.86913500  | 1.39196300  |
| C | -6.23836100 | 2.24636300  | -4.76035700 |
| C | -7.15707600 | 3.21059300  | -5.52082200 |
| H | -7.72359800 | 3.85829300  | -4.84311200 |

|   |              |             |             |
|---|--------------|-------------|-------------|
| H | -7.86643800  | 2.66054300  | -6.15004800 |
| H | -6.55556600  | 3.86224600  | -6.16772900 |
| C | -5.55661900  | 1.29331600  | -5.73636300 |
| H | -6.86010600  | 1.64499400  | -4.08216300 |
| H | -5.06829700  | 1.83890200  | -6.55223300 |
| H | -6.29964600  | 0.63424700  | -6.19598400 |
| H | -4.80146700  | 0.66830600  | -5.24764400 |
| H | -5.45481100  | 12.58119700 | -6.54696200 |
| H | -8.02008800  | 12.60529200 | -5.47360000 |
| H | -8.97101000  | 1.35494800  | -0.53226300 |
| H | -6.38182100  | 1.35569100  | -1.54634600 |
| C | -8.70131900  | 10.33767600 | -4.21782400 |
| C | -8.65317100  | 10.30039300 | -2.81741200 |
| C | -9.88721200  | 10.13611800 | -4.93584000 |
| C | -9.84772300  | 10.08636200 | -2.13489600 |
| C | -11.05789600 | 9.93044300  | -4.20635100 |
| C | -11.04022000 | 9.91418500  | -2.82043200 |
| H | -9.83869700  | 10.03267100 | -1.05045900 |
| H | -11.99312900 | 9.76359700  | -4.73105500 |
| H | -11.96017600 | 9.73999500  | -2.27000800 |
| C | -9.87003300  | 10.00002500 | -6.44603000 |
| C | -9.40211100  | 8.58262100  | -6.79830800 |
| H | -8.39814900  | 8.37410000  | -6.41332900 |
| H | -9.39635000  | 8.43124000  | -7.88401400 |
| H | -10.08225200 | 7.84623800  | -6.35090800 |
| C | -11.21781700 | 10.28408100 | -7.10056800 |
| H | -9.14034800  | 10.71273200 | -6.85561900 |
| H | -11.94487700 | 9.49480700  | -6.87648200 |
| H | -11.10641400 | 10.31265000 | -8.18890600 |
| H | -11.64435000 | 11.23922200 | -6.77570700 |
| C | -7.34596800  | 10.44591700 | -2.06614500 |
| C | -7.08308500  | 11.91534500 | -1.73084600 |
| H | -6.11707900  | 12.03576100 | -1.22261700 |
| H | -7.86446300  | 12.31302100 | -1.07055200 |

|   |             |             |             |
|---|-------------|-------------|-------------|
| H | -7.06508600 | 12.53151900 | -2.64006000 |
| C | -7.27768100 | 9.55211100  | -0.82977100 |
| H | -6.54321200 | 10.10547100 | -2.72851800 |
| H | -6.25555900 | 9.54950800  | -0.43119800 |
| H | -7.54555100 | 8.51549400  | -1.08542100 |
| H | -7.93961100 | 9.89555800  | -0.02543100 |
| H | -8.28662800 | 8.02700600  | -3.69054100 |
| H | -6.23621500 | 5.81380600  | -3.62204200 |

55. NHC\_Full\_C<sub>2</sub>H<sub>5</sub>\_H (fully optimized)-singlet:

|   |              |             |             |
|---|--------------|-------------|-------------|
| N | -8.87277700  | 3.69372600  | -1.93261700 |
| C | -7.43557300  | 2.05903500  | -1.66256200 |
| C | -8.74011800  | 2.37635100  | -1.54831200 |
| C | -7.64828400  | 4.24200600  | -2.26796100 |
| C | -6.27421600  | 6.47731500  | -3.14156300 |
| C | -6.16272700  | 7.88735100  | -2.87428600 |
| C | -5.50389400  | 5.87857900  | -4.30616800 |
| H | -4.77211400  | 5.14178200  | -3.93499500 |
| H | -4.90326000  | 6.64801400  | -4.79818500 |
| C | -6.52113800  | 8.30853200  | -1.45125000 |
| H | -6.37948200  | 7.43849500  | -0.79510700 |
| H | -7.57998000  | 8.56660400  | -1.32249200 |
| N | -7.40123500  | 10.95041200 | -3.69314100 |
| N | -5.68184300  | 11.22072900 | -4.98622500 |
| C | -7.53487300  | 12.17940000 | -4.31288500 |
| C | -6.47518500  | 12.33848700 | -5.12857200 |
| B | -5.73921700  | 8.87498000  | -3.91285300 |
| B | -7.37649800  | 5.74347200  | -2.44331000 |
| C | -6.23391200  | 10.32771000 | -4.08936700 |
| C | -10.06628300 | 4.45406000  | -1.73521600 |
| C | -11.08852900 | 4.39335200  | -2.69074100 |
| C | -10.17259900 | 5.19824800  | -0.55454600 |
| C | -12.21801900 | 5.18386300  | -2.46898200 |
| C | -11.32984300 | 5.94973500  | -0.36404200 |
| C | -12.33297100 | 5.96086300  | -1.32266900 |
| H | -13.03215200 | 5.16971100  | -3.18692900 |
| H | -13.22593300 | 6.56064800  | -1.16708300 |
| H | -11.44213900 | 6.52535900  | 0.55279300  |
| C | -9.10487000  | 5.13845300  | 0.51792500  |
| C | -9.55104800  | 4.20417400  | 1.64456500  |
| H | -9.74027400  | 3.18990900  | 1.27221900  |
| H | -10.47515100 | 4.56998100  | 2.11122800  |
| H | -8.78013300  | 4.14215000  | 2.42220200  |

|   |              |             |             |
|---|--------------|-------------|-------------|
| C | -8.73682300  | 6.51839200  | 1.05965200  |
| H | -8.20063500  | 4.70896400  | 0.07588000  |
| H | -7.80331200  | 6.45747900  | 1.63670700  |
| H | -9.51087200  | 6.90733200  | 1.73500600  |
| H | -8.58962700  | 7.24051400  | 0.24923500  |
| C | -10.97999000 | 3.45364500  | -3.88009900 |
| C | -12.33778500 | 3.05495600  | -4.44951600 |
| H | -12.21131600 | 2.26636000  | -5.19787300 |
| H | -12.82071700 | 3.89918100  | -4.95591200 |
| H | -13.02148300 | 2.68747500  | -3.67691300 |
| C | -10.10279600 | 4.03219700  | -4.99094500 |
| H | -10.49110000 | 2.53743100  | -3.51645400 |
| H | -9.94366500  | 3.28814700  | -5.77971500 |
| H | -9.12633700  | 4.36094600  | -4.61913400 |
| H | -10.59847600 | 4.89970400  | -5.44243500 |
| C | -4.67312800  | 10.89322300 | -5.94726300 |
| C | -3.35551600  | 11.30781500 | -5.73611900 |
| C | -4.10666600  | 9.89463000  | -8.04186200 |
| C | -2.78904300  | 10.28462700 | -7.85607100 |
| C | -2.41807500  | 10.98728800 | -6.71788200 |
| H | -2.04214700  | 10.04430200 | -8.60760000 |
| H | -1.38398000  | 11.29280400 | -6.59156100 |
| C | -2.96853200  | 12.03379500 | -4.46295300 |
| C | -2.72327900  | 11.01934200 | -3.34150700 |
| H | -3.59697000  | 10.38094400 | -3.16636400 |
| H | -2.47137600  | 11.52992900 | -2.40481500 |
| H | -1.88362400  | 10.36539300 | -3.60879600 |
| C | -1.74985900  | 12.93558300 | -4.63135300 |
| H | -3.82041200  | 12.66441200 | -4.16882600 |
| H | -1.60681500  | 13.54504200 | -3.73360100 |
| H | -1.84710100  | 13.60841400 | -5.49015100 |
| H | -0.83396700  | 12.34767600 | -4.76456300 |
| C | -5.07829600  | 10.19331600 | -7.08923400 |
| C | -6.51946400  | 9.77913200  | -7.31091200 |



|   |             |             |             |
|---|-------------|-------------|-------------|
| C | -6.65395600 | 8.27069400  | -7.52054500 |
| H | -7.71522400 | 7.98657900  | -7.55470300 |
| H | -6.18046000 | 7.71419400  | -6.70434200 |
| H | -6.19857900 | 7.95449500  | -8.46778800 |
| C | -7.12584000 | 10.55363400 | -8.48158800 |
| H | -7.09500000 | 10.03490800 | -6.41501600 |
| H | -7.08454000 | 11.63555800 | -8.30910200 |
| H | -8.17520000 | 10.27138300 | -8.62881100 |
| H | -6.58726700 | 10.34193400 | -9.41415100 |
| H | -4.39387800 | 9.35063500  | -8.93944400 |
| N | -6.77199800 | 3.19546600  | -2.08849300 |
| C | -5.34773000 | 3.26297400  | -2.17488200 |
| C | -4.71090000 | 2.52730700  | -3.18259000 |
| C | -4.63187800 | 4.02641500  | -1.23143000 |
| C | -3.31608700 | 2.56444200  | -3.23824100 |
| C | -2.59077200 | 3.33321200  | -2.34764600 |
| C | -3.24598300 | 4.06035400  | -1.36161500 |
| H | -2.80157700 | 1.99395600  | -4.00731900 |
| H | -1.50723300 | 3.36929700  | -2.41561500 |
| H | -2.66232300 | 4.65606800  | -0.66801200 |
| C | -5.31882200 | 4.74883100  | -0.08602400 |
| C | -4.49298400 | 5.89468500  | 0.48675600  |
| H | -3.61599600 | 5.54438100  | 1.04554400  |
| H | -5.11020000 | 6.47636700  | 1.18225900  |
| H | -4.15603400 | 6.57239100  | -0.30805700 |
| C | -5.73984300 | 3.77603000  | 1.01850500  |
| H | -6.22801500 | 5.21150300  | -0.48895200 |
| H | -4.87005200 | 3.28141900  | 1.46927200  |
| H | -6.41867400 | 2.99789400  | 0.64679000  |
| H | -6.26743500 | 4.32115400  | 1.81395800  |
| C | -5.46309700 | 1.70394600  | -4.21164300 |
| C | -4.94383800 | 1.96624500  | -5.62810600 |
| H | -4.82911800 | 3.03538400  | -5.82446300 |
| H | -5.63084400 | 1.54795100  | -6.37120200 |

|   |              |             |             |
|---|--------------|-------------|-------------|
| H | -3.96999300  | 1.48757900  | -5.78542500 |
| C | -5.34032500  | 0.20884000  | -3.90252500 |
| H | -6.52365400  | 1.98788600  | -4.17800000 |
| H | -4.28350000  | -0.08775300 | -3.91471100 |
| H | -5.86447400  | -0.39028900 | -4.65548700 |
| H | -5.74225200  | -0.05438700 | -2.91929000 |
| H | -6.20345700  | 13.13537800 | -5.80223100 |
| H | -8.39233300  | 12.80447700 | -4.12886700 |
| H | -9.59321300  | 1.79397500  | -1.23805200 |
| H | -6.89988600  | 1.14765100  | -1.45451500 |
| C | -8.41819900  | 10.39280700 | -2.85199900 |
| C | -8.66762200  | 10.99970600 | -1.61024700 |
| C | -9.14332900  | 9.26711500  | -3.29791600 |
| C | -9.62454500  | 10.41402800 | -0.77924900 |
| C | -10.04517400 | 8.69168900  | -2.40276300 |
| C | -10.28161100 | 9.25551600  | -1.15532900 |
| H | -9.84065900  | 10.87140300 | 0.18273500  |
| H | -10.57535300 | 7.78353600  | -2.67862600 |
| H | -10.99574200 | 8.78793200  | -0.48212800 |
| C | -9.02878800  | 8.74242000  | -4.71887600 |
| C | -9.66614100  | 7.37275500  | -4.91047900 |
| H | -9.29157000  | 6.65179000  | -4.17550700 |
| H | -9.42265900  | 6.99368700  | -5.91157000 |
| H | -10.76356500 | 7.41362900  | -4.83564500 |
| C | -9.66604600  | 9.73360900  | -5.70134500 |
| H | -7.96195200  | 8.62776900  | -4.96185200 |
| H | -10.74049200 | 9.83161100  | -5.49923400 |
| H | -9.55199900  | 9.36882400  | -6.73142100 |
| H | -9.22111500  | 10.73328200 | -5.65247100 |
| C | -8.00209800  | 12.29133600 | -1.16535600 |
| C | -8.97715700  | 13.46097800 | -1.35222800 |
| H | -8.51004000  | 14.41125000 | -1.07013700 |
| H | -9.85351100  | 13.31328900 | -0.70788300 |
| H | -9.34687600  | 13.55105600 | -2.37808800 |

|   |             |             |             |
|---|-------------|-------------|-------------|
| C | -7.55436200 | 12.26927600 | 0.29715800  |
| H | -7.11319800 | 12.46197700 | -1.78735600 |
| H | -6.96911300 | 13.16736300 | 0.52181000  |
| H | -6.94421100 | 11.39451100 | 0.52776600  |
| H | -8.41476000 | 12.27340600 | 0.97612500  |
| C | -5.64619200 | 9.43973000  | -0.92588700 |
| H | -4.58365800 | 9.20619100  | -1.07585600 |
| H | -5.83544200 | 10.39145600 | -1.44232200 |
| H | -5.80704600 | 9.60053600  | 0.14732800  |
| C | -6.40993800 | 5.20587800  | -5.33888300 |
| H | -5.88812900 | 4.99244900  | -6.28134200 |
| H | -6.81676900 | 4.25826400  | -4.95851600 |
| H | -7.26952000 | 5.85414900  | -5.56661000 |
| H | -8.22163400 | 6.38142500  | -1.87462600 |
| H | -5.08817700 | 8.57545800  | -4.87068900 |

**56. NHC\_Full\_C<sub>2</sub>H<sub>5</sub>\_H** (fully optimized)-triplet:

|   |             |            |             |
|---|-------------|------------|-------------|
| N | -8.86340100 | 3.67122300 | -1.41583300 |
| C | -7.29681700 | 2.13461200 | -1.40952400 |
| C | -8.54599500 | 2.40522900 | -0.98046800 |
| C | -7.81869400 | 4.22369300 | -2.13850400 |

|   |              |             |             |
|---|--------------|-------------|-------------|
| C | -6.79295400  | 6.47230700  | -3.46386600 |
| C | -6.47841900  | 7.73304100  | -3.01991800 |
| C | -6.24594400  | 5.98181200  | -4.79695200 |
| H | -5.17757300  | 5.72333600  | -4.67074200 |
| H | -6.25489500  | 6.81125100  | -5.52010100 |
| C | -6.92774500  | 8.11307700  | -1.61159300 |
| H | -6.82984100  | 7.23450800  | -0.95817000 |
| H | -8.00718600  | 8.33066900  | -1.58386600 |
| N | -7.36894100  | 10.83679700 | -3.85286400 |
| N | -5.40663400  | 11.20580300 | -4.73021000 |
| C | -7.35461400  | 12.13643200 | -4.32727200 |
| C | -6.14796100  | 12.35821200 | -4.88054500 |
| B | -5.67826700  | 8.77854800  | -3.86466000 |
| B | -7.84896700  | 5.64698900  | -2.66932900 |
| C | -6.14760000  | 10.21631900 | -4.10048500 |
| C | -10.05166800 | 4.37802300  | -1.05307300 |
| C | -11.21806000 | 4.16851900  | -1.79523000 |
| C | -9.98277100  | 5.29607900  | 0.00400200  |
| C | -12.35525100 | 4.89240500  | -1.43185400 |
| C | -11.14278000 | 5.99346000  | 0.33173600  |
| C | -12.31955000 | 5.79001500  | -0.37617000 |
| H | -13.27868200 | 4.75245300  | -1.98567600 |
| H | -13.21609700 | 6.34182600  | -0.10580600 |
| H | -11.12069500 | 6.71252900  | 1.14594900  |
| C | -8.69562300  | 5.52136300  | 0.77104800  |
| C | -8.58352700  | 4.53104400  | 1.93339600  |
| H | -8.58553500  | 3.49287200  | 1.58091400  |
| H | -9.42482400  | 4.65551600  | 2.62741900  |
| H | -7.65510900  | 4.69371500  | 2.49354100  |
| C | -8.55080400  | 6.95872400  | 1.26926400  |
| H | -7.86113500  | 5.32897800  | 0.08372000  |
| H | -7.51121000  | 7.14665000  | 1.56778600  |
| H | -9.18088300  | 7.15037900  | 2.14724700  |
| H | -8.81624000  | 7.68380200  | 0.48812000  |

|   |              |             |             |
|---|--------------|-------------|-------------|
| C | -11.22562100 | 3.26258000  | -3.01112600 |
| C | -12.58415900 | 2.61816600  | -3.27321500 |
| H | -12.49383000 | 1.85622900  | -4.05373000 |
| H | -13.31372800 | 3.35338700  | -3.63249000 |
| H | -12.99694700 | 2.14310300  | -2.37689200 |
| C | -10.77453700 | 4.06201600  | -4.23937800 |
| H | -10.49519800 | 2.45845700  | -2.84343900 |
| H | -10.80780300 | 3.44262300  | -5.14344700 |
| H | -9.75563000  | 4.44773000  | -4.11744200 |
| H | -11.44146800 | 4.92275800  | -4.39102200 |
| C | -4.23584600  | 10.97376000 | -5.51725500 |
| C | -2.98438200  | 11.36079100 | -5.02498400 |
| C | -3.27741800  | 10.23748700 | -7.57991100 |
| C | -2.02233300  | 10.58850400 | -7.10882200 |
| C | -1.87840000  | 11.15149200 | -5.84745000 |
| H | -1.14632900  | 10.43463500 | -7.73282600 |
| H | -0.89022200  | 11.43777700 | -5.50094500 |
| C | -2.85175300  | 11.95621900 | -3.63691900 |
| C | -2.84843700  | 10.84021200 | -2.58890300 |
| H | -3.74701000  | 10.21760700 | -2.65834100 |
| H | -2.78871400  | 11.25655100 | -1.57670600 |
| H | -1.97916800  | 10.18810100 | -2.74118800 |
| C | -1.61621400  | 12.83510000 | -3.47337200 |
| H | -3.73941600  | 12.58157000 | -3.45992000 |
| H | -1.65031900  | 13.35445000 | -2.51059100 |
| H | -1.53407600  | 13.58739400 | -4.26523400 |
| H | -0.69737200  | 12.23668500 | -3.47893100 |
| C | -4.41181900  | 10.42831700 | -6.79237400 |
| C | -5.78226500  | 10.07842900 | -7.33335500 |
| C | -5.83720200  | 8.62237800  | -7.79140300 |
| H | -6.87565300  | 8.31179800  | -7.97071100 |
| H | -5.40682500  | 7.96305000  | -7.03121800 |
| H | -5.28161100  | 8.47373400  | -8.72643200 |
| C | -6.18260900  | 11.03128500 | -8.45926600 |

|   |             |             |             |
|---|-------------|-------------|-------------|
| H | -6.51392200 | 10.19593400 | -6.52776600 |
| H | -6.20452100 | 12.07124900 | -8.11276200 |
| H | -7.17934500 | 10.77880200 | -8.84096400 |
| H | -5.47551800 | 10.96971400 | -9.29662200 |
| H | -3.38868100 | 9.81510900  | -8.57661000 |
| N | -6.84164000 | 3.24098800  | -2.10518400 |
| C | -5.51318300 | 3.34701900  | -2.62571900 |
| C | -5.11781100 | 2.48604600  | -3.66319900 |
| C | -4.63241400 | 4.29151500  | -2.06342400 |
| C | -3.82671900 | 2.62798900  | -4.17129800 |
| C | -2.96372300 | 3.58998000  | -3.67398200 |
| C | -3.36295000 | 4.40690700  | -2.62633300 |
| H | -3.50049100 | 1.97414900  | -4.97572700 |
| H | -1.96898100 | 3.69823800  | -4.09671500 |
| H | -2.67197400 | 5.14484500  | -2.23345400 |
| C | -5.03643700 | 5.12293100  | -0.86476500 |
| C | -4.15644900 | 6.34373100  | -0.63978700 |
| H | -3.14349900 | 6.07358900  | -0.31458100 |
| H | -4.59564600 | 6.96634000  | 0.14936900  |
| H | -4.08677800 | 6.95499500  | -1.54946200 |
| C | -5.12986700 | 4.28545900  | 0.41484700  |
| H | -6.04120000 | 5.49818100  | -1.07213800 |
| H | -4.16464100 | 3.82874500  | 0.66717000  |
| H | -5.87793500 | 3.48674000  | 0.33882000  |
| H | -5.42519600 | 4.93089600  | 1.25348700  |
| C | -6.01001400 | 1.38621900  | -4.21435400 |
| C | -5.99518900 | 1.29869300  | -5.74162300 |
| H | -6.23099400 | 2.25397800  | -6.21349800 |
| H | -6.72990700 | 0.55911800  | -6.07757300 |
| H | -5.01888200 | 0.96673700  | -6.11253600 |
| C | -5.56290500 | 0.03169400  | -3.65009200 |
| H | -7.04364600 | 1.58436200  | -3.89934900 |
| H | -4.54517900 | -0.19115900 | -3.99569400 |
| H | -6.21870600 | -0.77449000 | -3.99738600 |

|   |              |             |             |
|---|--------------|-------------|-------------|
| H | -5.54066900  | 0.00976500  | -2.55645900 |
| H | -5.73767700  | 13.22405200 | -5.37560700 |
| H | -8.22216000  | 12.76821200 | -4.23865300 |
| H | -9.24159800  | 1.81995700  | -0.40040500 |
| H | -6.66851000  | 1.27279900  | -1.26183400 |
| C | -8.53389300  | 10.24293800 | -3.27294700 |
| C | -9.04044800  | 10.76241800 | -2.06952100 |
| C | -9.14890600  | 9.15628900  | -3.93077000 |
| C | -10.13057000 | 10.11339500 | -1.48529400 |
| C | -10.20081800 | 8.51704700  | -3.27651100 |
| C | -10.67907400 | 8.97738300  | -2.05663400 |
| H | -10.53418000 | 10.49737600 | -0.55196300 |
| H | -10.65756900 | 7.63655600  | -3.71994400 |
| H | -11.49609200 | 8.45435400  | -1.56676000 |
| C | -8.74620500  | 8.75729000  | -5.33769200 |
| C | -9.31222300  | 7.41060700  | -5.76336200 |
| H | -9.13106600  | 6.64785800  | -4.99830700 |
| H | -8.83261800  | 7.08526100  | -6.69502400 |
| H | -10.39365700 | 7.46419500  | -5.94905200 |
| C | -9.18042400  | 9.83424400  | -6.34074500 |
| H | -7.64981400  | 8.67102500  | -5.37648400 |
| H | -10.27347000 | 9.93223500  | -6.34603100 |
| H | -8.86514100  | 9.55527800  | -7.35572700 |
| H | -8.75400800  | 10.81938600 | -6.12006400 |
| C | -8.49054500  | 12.00251100 | -1.38524600 |
| C | -9.41149800  | 13.19914300 | -1.65388100 |
| H | -9.02341700  | 14.10741300 | -1.17909000 |
| H | -10.40487400 | 12.99834400 | -1.23237900 |
| H | -9.55159700  | 13.40252300 | -2.71982900 |
| C | -8.35672500  | 11.82974600 | 0.13082800  |
| H | -7.49410100  | 12.21924300 | -1.79251900 |
| H | -7.76523800  | 12.64795000 | 0.55499200  |
| H | -7.87949800  | 10.88341800 | 0.39556900  |
| H | -9.33764700  | 11.86039200 | 0.61909600  |

|   |             |             |             |
|---|-------------|-------------|-------------|
| C | -6.14700100 | 9.24865700  | -0.95916700 |
| H | -5.06582100 | 9.08597800  | -1.05145100 |
| H | -6.35742800 | 10.22784700 | -1.40632100 |
| H | -6.37966900 | 9.31258500  | 0.11219000  |
| C | -6.95859100 | 4.78928000  | -5.42718400 |
| H | -6.41530100 | 4.44668000  | -6.31559600 |
| H | -7.03901500 | 3.94106700  | -4.73879200 |
| H | -7.97817700 | 5.03174600  | -5.74235800 |
| H | -8.85277200 | 6.21988900  | -2.33449700 |
| H | -4.64045500 | 8.51584500  | -4.41225100 |

**57. NHC\_Full\_C<sub>2</sub>H<sub>5</sub>\_H (twisted)-singlet:**

|   |              |            |             |
|---|--------------|------------|-------------|
| N | -9.31819900  | 4.82904100 | -0.34001400 |
| C | -10.58512200 | 6.62403400 | -0.38642200 |
| C | -10.49369500 | 5.38184100 | 0.12511100  |
| C | -8.59434300  | 5.76219600 | -1.07760600 |
| C | -6.31201800  | 6.38524000 | -2.57492300 |
| C | -6.35521300  | 6.51436600 | -3.92839300 |
| C | -5.08664200  | 6.97374700 | -1.84946400 |
| H | -4.98739000  | 8.04074600 | -2.11390800 |
| H | -4.17319700  | 6.51697400 | -2.26555600 |



|   |              |             |             |
|---|--------------|-------------|-------------|
| C | -7.52614100  | 5.94530000  | -4.69604300 |
| H | -8.31528100  | 5.65581500  | -3.98025400 |
| H | -7.22728900  | 5.00842200  | -5.19332100 |
| N | -3.43500500  | 5.76957900  | -5.25767000 |
| N | -3.03986100  | 7.84144700  | -5.78517500 |
| C | -2.17887300  | 5.82455000  | -5.83439400 |
| C | -1.93643100  | 7.10905300  | -6.16434700 |
| B | -5.33702000  | 7.47757800  | -4.64683200 |
| B | -7.25685100  | 5.46826400  | -1.71968200 |
| C | -3.97497800  | 7.04435000  | -5.14869800 |
| C | -8.92872400  | 3.47717900  | -0.10611400 |
| C | -8.57789300  | 3.08417700  | 1.19695700  |
| C | -8.93288200  | 2.57800100  | -1.18151200 |
| C | -8.25411900  | 1.74496500  | 1.40668900  |
| C | -8.58615000  | 1.25289400  | -0.92012100 |
| C | -8.25667600  | 0.83590000  | 0.35837700  |
| H | -7.98547500  | 1.40774700  | 2.40244600  |
| H | -7.99783600  | -0.20303200 | 0.54241400  |
| H | -8.58904700  | 0.53744600  | -1.73953400 |
| C | -9.32611900  | 2.96492100  | -2.59571900 |
| C | -10.61879500 | 2.25566400  | -3.00383800 |
| H | -11.45508300 | 2.53623900  | -2.35231700 |
| H | -10.50742000 | 1.16549500  | -2.95003500 |
| H | -10.88526500 | 2.51019000  | -4.03593200 |
| C | -8.20586300  | 2.67288300  | -3.59500000 |
| H | -9.50544600  | 4.04403700  | -2.62872300 |
| H | -8.50976100  | 2.98287200  | -4.60531300 |
| H | -7.96963500  | 1.60128500  | -3.63559900 |
| H | -7.28677900  | 3.21921200  | -3.34470600 |
| C | -8.45647700  | 4.10556800  | 2.31373800  |
| C | -8.48412600  | 3.49399500  | 3.71001400  |
| H | -8.52551000  | 4.28723600  | 4.46279200  |
| H | -7.57623200  | 2.91250700  | 3.90989900  |
| H | -9.34717800  | 2.83644700  | 3.86023300  |

|   |             |             |              |
|---|-------------|-------------|--------------|
| C | -7.16780500 | 4.91141400  | 2.11883600   |
| H | -9.29966900 | 4.80622800  | 2.24279100   |
| H | -7.06041300 | 5.67036500  | 2.90249400   |
| H | -7.14422200 | 5.41055100  | 1.14504900   |
| H | -6.29879700 | 4.24301800  | 2.17040900   |
| C | -3.22718700 | 9.21747000  | -6.10071200  |
| C | -3.62366200 | 9.53753000  | -7.40200900  |
| C | -3.19926700 | 11.51919600 | -5.46969100  |
| C | -3.55381500 | 11.86787200 | -6.76741700  |
| C | -3.77380200 | 10.88751000 | -7.72129100  |
| H | -3.67692800 | 12.91514700 | -7.02927600  |
| H | -4.08965900 | 11.16544700 | -8.72448400  |
| C | -3.99904600 | 8.46326000  | -8.40153600  |
| C | -5.52293300 | 8.43217800  | -8.53948100  |
| H | -5.99648100 | 8.35563900  | -7.55342400  |
| H | -5.84345400 | 7.57936000  | -9.15351000  |
| H | -5.88791800 | 9.35048300  | -9.01836300  |
| C | -3.33032600 | 8.64498300  | -9.76069500  |
| H | -3.68537000 | 7.49236900  | -7.99956800  |
| H | -3.59816000 | 7.81682800  | -10.42740800 |
| H | -2.23898100 | 8.67557500  | -9.67819500  |
| H | -3.65608800 | 9.57163200  | -10.24837500 |
| C | -3.03410000 | 10.18461700 | -5.10747000  |
| C | -2.63529200 | 9.77587400  | -3.70430500  |
| C | -3.13347100 | 10.74867700 | -2.64143000  |
| H | -3.00931400 | 10.31310000 | -1.64392800  |
| H | -4.19448900 | 10.98144100 | -2.78069300  |
| H | -2.57232500 | 11.69163400 | -2.65454300  |
| C | -1.11576800 | 9.61132300  | -3.61777600  |
| H | -3.10292400 | 8.80198000  | -3.50001200  |
| H | -0.74799200 | 8.86631600  | -4.33194800  |
| H | -0.81261800 | 9.29533100  | -2.61337600  |
| H | -0.61736800 | 10.56411600 | -3.83793600  |
| H | -3.05661400 | 12.29745400 | -4.72563400  |

|   |              |             |             |
|---|--------------|-------------|-------------|
| N | -9.46498600  | 6.84906500  | -1.17298000 |
| C | -9.57918900  | 7.74125300  | -2.29672400 |
| C | -8.81375100  | 8.91156700  | -2.32999300 |
| C | -10.53971600 | 7.45239000  | -3.28003300 |
| C | -9.06195400  | 9.83246600  | -3.34550800 |
| C | -10.05687300 | 9.60288200  | -4.28627100 |
| C | -10.77621600 | 8.42060100  | -4.25856100 |
| H | -8.47845700  | 10.74706600 | -3.39013200 |
| H | -10.25311300 | 10.34041100 | -5.05939600 |
| H | -11.53247200 | 8.23014700  | -5.01731400 |
| C | -11.36193500 | 6.17173300  | -3.30508200 |
| C | -11.24557600 | 5.42103200  | -4.63406900 |
| H | -11.48875600 | 6.06468000  | -5.48770600 |
| H | -11.95116000 | 4.58226000  | -4.64651500 |
| H | -10.23811900 | 5.01811500  | -4.79240700 |
| C | -12.83353600 | 6.48577700  | -3.01920100 |
| H | -10.99986000 | 5.49883400  | -2.51901600 |
| H | -13.25123700 | 7.12371400  | -3.80810100 |
| H | -12.95943100 | 7.01345300  | -2.06811000 |
| H | -13.42858900 | 5.56660100  | -2.98335800 |
| C | -7.80397500  | 9.18177600  | -1.24008800 |
| C | -6.66165500  | 10.07389600 | -1.70881500 |
| H | -6.27841000  | 9.74226800  | -2.68261500 |
| H | -5.83722500  | 10.04554700 | -0.98567000 |
| H | -6.97676200  | 11.12170000 | -1.80100200 |
| C | -8.49907600  | 9.78425400  | -0.01635800 |
| H | -7.38257900  | 8.21146700  | -0.95242200 |
| H | -8.95675100  | 10.74751600 | -0.27575700 |
| H | -7.78100400  | 9.95887200  | 0.79306200  |
| H | -9.28734000  | 9.12662900  | 0.36606100  |
| H | -1.08795800  | 7.57961100  | -6.63537000 |
| H | -1.59833900  | 4.92768000  | -5.98251000 |
| H | -11.15529500 | 4.82675800  | 0.77092600  |
| H | -11.35872500 | 7.37128700  | -0.30507100 |

|   |             |            |             |
|---|-------------|------------|-------------|
| C | -4.12493700 | 4.52020400 | -5.12493100 |
| C | -5.00351200 | 4.10783500 | -6.14621600 |
| C | -3.80389200 | 3.69187300 | -4.04545700 |
| C | -5.55207700 | 2.83029800 | -6.04744200 |
| C | -4.37037600 | 2.41715100 | -3.99855000 |
| C | -5.23000600 | 1.98638300 | -4.99333600 |
| H | -6.23896700 | 2.48626200 | -6.81517900 |
| H | -4.12889400 | 1.76184000 | -3.16506900 |
| H | -5.66563500 | 0.99202400 | -4.94432800 |
| C | -2.85630700 | 4.12222100 | -2.94682700 |
| C | -3.48389500 | 3.88597300 | -1.57179600 |
| H | -4.53007400 | 4.20881700 | -1.55565500 |
| H | -2.93715600 | 4.43222200 | -0.79454800 |
| H | -3.45858500 | 2.82243400 | -1.30393100 |
| C | -1.52233600 | 3.38221000 | -3.06316700 |
| H | -2.66470500 | 5.19599900 | -3.06274700 |
| H | -1.68127200 | 2.29824800 | -2.99482500 |
| H | -0.84210200 | 3.67293300 | -2.25492600 |
| H | -1.02202800 | 3.58470600 | -4.01671900 |
| C | -5.32082200 | 4.98795900 | -7.34410500 |
| C | -4.22926500 | 4.86368700 | -8.41551600 |
| H | -4.45479000 | 5.52236100 | -9.26617800 |
| H | -4.19018200 | 3.83327100 | -8.79183200 |
| H | -3.23537600 | 5.12604400 | -8.04167100 |
| C | -6.66686700 | 4.67472100 | -7.99762000 |
| H | -5.35115100 | 6.03165800 | -6.99240700 |
| H | -6.92183200 | 5.46863400 | -8.70911500 |
| H | -7.48443600 | 4.59871900 | -7.27355800 |
| H | -6.62571500 | 3.73701000 | -8.56597900 |
| C | -8.08222000 | 6.91873400 | -5.72949000 |
| H | -7.38810200 | 7.04513700 | -6.56923600 |
| H | -9.04221500 | 6.58551700 | -6.14402900 |
| H | -8.22746000 | 7.90614200 | -5.27850900 |
| C | -5.04610300 | 6.83335800 | -0.33106900 |

|   |             |            |             |
|---|-------------|------------|-------------|
| H | -4.13135100 | 7.27923800 | 0.07695600  |
| H | -5.89630500 | 7.32737900 | 0.15695500  |
| H | -5.07365500 | 5.78416600 | -0.01564400 |
| H | -6.80633700 | 4.42062300 | -1.32668900 |
| H | -5.59374400 | 8.64568200 | -4.80236600 |

**58. NHC\_Full\_C<sub>2</sub>H<sub>5</sub>\_H (twisted)-triplet:**

|   |              |            |             |
|---|--------------|------------|-------------|
| N | -9.31865500  | 4.83049200 | -0.33783900 |
| C | -10.58100300 | 6.62876800 | -0.38534000 |
| C | -10.49274600 | 5.38662300 | 0.12683300  |
| C | -8.59266700  | 5.76138300 | -1.07638100 |
| C | -6.31090100  | 6.38323200 | -2.57359400 |
| C | -6.35544100  | 6.51151300 | -3.92637700 |
| C | -5.08502200  | 6.97046500 | -1.84657700 |
| H | -4.98633800  | 8.03854100 | -2.10547200 |
| H | -4.17062100  | 6.51616900 | -2.26322500 |
| C | -7.52880400  | 5.94499800 | -4.69312600 |
| H | -8.32005900  | 5.65884000 | -3.97895500 |
| H | -7.23197900  | 5.00666300 | -5.18896800 |
| N | -3.43345200  | 5.77087900 | -5.25493100 |
| N | -3.04088700  | 7.84367800 | -5.78251700 |

|   |              |             |             |
|---|--------------|-------------|-------------|
| C | -2.17739000  | 5.82756800  | -5.83185300 |
| C | -1.93685000  | 7.11234100  | -6.16212300 |
| B | -5.33740800  | 7.47608700  | -4.64452900 |
| B | -7.25535100  | 5.46499700  | -1.71752500 |
| C | -3.97523800  | 7.04502500  | -5.14649100 |
| C | -8.93260600  | 3.47771700  | -0.10412700 |
| C | -8.58481900  | 3.08315200  | 1.19938800  |
| C | -8.93669600  | 2.57902200  | -1.17999200 |
| C | -8.26418100  | 1.74319300  | 1.40896900  |
| C | -8.59291900  | 1.25310900  | -0.91866100 |
| C | -8.26655600  | 0.83471000  | 0.36014400  |
| H | -7.99805900  | 1.40489400  | 2.40503000  |
| H | -8.01005200  | -0.20482400 | 0.54403300  |
| H | -8.59589400  | 0.53808600  | -1.73844000 |
| C | -9.32769700  | 2.96671300  | -2.59462300 |
| C | -10.62123700 | 2.25974700  | -3.00403500 |
| H | -11.45777100 | 2.54217100  | -2.35362200 |
| H | -10.51201600 | 1.16939500  | -2.94967200 |
| H | -10.88597500 | 2.51439900  | -4.03653900 |
| C | -8.20695900  | 2.67273800  | -3.59274900 |
| H | -9.50512600  | 4.04612600  | -2.62791100 |
| H | -8.50973300  | 2.98233300  | -4.60348900 |
| H | -7.97184700  | 1.60088300  | -3.63244700 |
| H | -7.28746300  | 3.21824100  | -3.34203500 |
| C | -8.46271700  | 4.10366000  | 2.31688900  |
| C | -8.49325300  | 3.49151000  | 3.71284200  |
| H | -8.53420900  | 4.28448700  | 4.46592000  |
| H | -7.58664400  | 2.90834000  | 3.91365300  |
| H | -9.35765900  | 2.83541300  | 3.86164800  |
| C | -7.17210600  | 4.90676900  | 2.12360300  |
| H | -9.30422800  | 4.80623700  | 2.24539500  |
| H | -7.06408900  | 5.66563100  | 2.90726600  |
| H | -7.14632200  | 5.40562000  | 1.14972600  |
| H | -6.30460000  | 4.23652700  | 2.17634700  |

|   |              |             |              |
|---|--------------|-------------|--------------|
| C | -3.23150000  | 9.21825600  | -6.10241000  |
| C | -3.62429000  | 9.53321700  | -7.40604200  |
| C | -3.21240000  | 11.52219300 | -5.47878800  |
| C | -3.56296800  | 11.86578900 | -6.77900300  |
| C | -3.77676700  | 10.88177600 | -7.73037700  |
| H | -3.68789100  | 12.91188800 | -7.04466300  |
| H | -4.08960200  | 11.15544500 | -8.73571900  |
| C | -3.99279200  | 8.45517900  | -8.40413900  |
| C | -5.51530500  | 8.42538700  | -8.55624000  |
| H | -5.99828600  | 8.35172600  | -7.57456400  |
| H | -5.83075600  | 7.57132400  | -9.17109700  |
| H | -5.87512500  | 9.34262100  | -9.04100400  |
| C | -3.31109500  | 8.63048100  | -9.75771700  |
| H | -3.68407400  | 7.48561900  | -7.99535300  |
| H | -3.57562400  | 7.80131400  | -10.42451900 |
| H | -2.22043600  | 8.65746700  | -9.66512100  |
| H | -3.62894000  | 9.55702100  | -10.25084700 |
| C | -3.04468000  | 10.18932700 | -5.11155900  |
| C | -2.65006200  | 9.78602900  | -3.70559700  |
| C | -3.14089800  | 10.76878200 | -2.64846400  |
| H | -3.02079800  | 10.33759900 | -1.64858700  |
| H | -4.19969600  | 11.01047300 | -2.78916900  |
| H | -2.57132800  | 11.70662000 | -2.66653800  |
| C | -1.13180000  | 9.61096100  | -3.61597600  |
| H | -3.12495800  | 8.81653700  | -3.49649800  |
| H | -0.76782500  | 8.85945800  | -4.32511900  |
| H | -0.83262200  | 9.29856900  | -2.60926100  |
| H | -0.62649600  | 10.55910400 | -3.84038700  |
| H | -3.07483600  | 12.30334500 | -4.73686100  |
| N | -9.46048700  | 6.85072000  | -1.17237800  |
| C | -9.57402400  | 7.74232700  | -2.29687900  |
| C | -8.80743700  | 8.91196700  | -2.33109900  |
| C | -10.53592800 | 7.45458900  | -3.27918500  |
| C | -9.05572400  | 9.83297100  | -3.34653800  |

|   |              |             |             |
|---|--------------|-------------|-------------|
| C | -10.05182900 | 9.60441000  | -4.28624000 |
| C | -10.77236000 | 8.42288900  | -4.25763800 |
| H | -8.47131500  | 10.74693000 | -3.39193800 |
| H | -10.24807700 | 10.34207500 | -5.05923200 |
| H | -11.52961300 | 8.23318100  | -5.01556400 |
| C | -11.35952300 | 6.17480900  | -3.30362100 |
| C | -11.24533700 | 5.42456000  | -4.63310100 |
| H | -11.48867400 | 6.06896000  | -5.48611900 |
| H | -11.95190100 | 4.58661800  | -4.64529200 |
| H | -10.23857100 | 5.02054300  | -4.79286000 |
| C | -12.83056200 | 6.49023100  | -3.01629900 |
| H | -10.99734600 | 5.50138400  | -2.51802300 |
| H | -13.24843400 | 7.12846600  | -3.80486700 |
| H | -12.95510000 | 7.01804700  | -2.06512700 |
| H | -13.42639300 | 5.57158000  | -2.97985800 |
| C | -7.79673900  | 9.18223300  | -1.24198900 |
| C | -6.65417800  | 10.07380300 | -1.71170800 |
| H | -6.26924500  | 9.74025500  | -2.68425000 |
| H | -5.83083000  | 10.04799200 | -0.98730000 |
| H | -6.96978200  | 11.12121500 | -1.80674700 |
| C | -8.49096300  | 9.78637900  | -0.01857200 |
| H | -7.37590600  | 8.21193200  | -0.95363900 |
| H | -8.94793800  | 10.74977600 | -0.27871400 |
| H | -7.77255700  | 9.96109500  | 0.79052400  |
| H | -9.27966600  | 9.12970000  | 0.36456100  |
| H | -1.08921500  | 7.58385200  | -6.63375000 |
| H | -1.59553000  | 4.93160000  | -5.98024000 |
| H | -11.15598000 | 4.83359300  | 0.77273300  |
| H | -11.35262900 | 7.37807800  | -0.30406900 |
| C | -4.12308100  | 4.52133400  | -5.12282300 |
| C | -5.00298100  | 4.11000500  | -6.14345100 |
| C | -3.80195700  | 3.69197700  | -4.04408000 |
| C | -5.55333400  | 2.83329600  | -6.04437000 |
| C | -4.36962500  | 2.41778900  | -3.99723400 |



|   |             |            |             |
|---|-------------|------------|-------------|
| C | -5.23086900 | 1.98838800 | -4.99120400 |
| H | -6.24135300 | 2.49034500 | -6.81159800 |
| H | -4.12779500 | 1.76174500 | -3.16442900 |
| H | -5.66762600 | 0.99452800 | -4.94213700 |
| C | -2.85315200 | 4.12061500 | -2.94588300 |
| C | -3.48023600 | 3.88321900 | -1.57081600 |
| H | -4.52679600 | 4.20479000 | -1.55475500 |
| H | -2.93421800 | 4.42977300 | -0.79329300 |
| H | -3.45375400 | 2.81960300 | -1.30338600 |
| C | -1.51978100 | 3.37979500 | -3.06384300 |
| H | -2.66090500 | 5.19436300 | -3.06088900 |
| H | -1.67945600 | 2.29588500 | -2.99633600 |
| H | -0.83873900 | 3.66932100 | -2.25584600 |
| H | -1.02001800 | 3.58275100 | -4.01758200 |
| C | -5.31796900 | 4.98887000 | -7.34269900 |
| C | -4.22564900 | 4.85920900 | -8.41278000 |
| H | -4.44840200 | 5.51633200 | -9.26536400 |
| H | -4.18898100 | 3.82770300 | -8.78635900 |
| H | -3.23147400 | 5.11979200 | -8.03842500 |
| C | -6.66418800 | 4.67803700 | -7.99694300 |
| H | -5.34583700 | 6.03341300 | -6.99323500 |
| H | -6.91607000 | 5.47173000 | -8.70972000 |
| H | -7.48281600 | 4.60526900 | -7.27385700 |
| H | -6.62485400 | 3.73951500 | -8.56407000 |
| C | -8.07907600 | 6.91896100 | -5.72859300 |
| H | -7.37938300 | 7.04538600 | -6.56387600 |
| H | -9.03677100 | 6.58654000 | -6.14902400 |
| H | -8.22615900 | 7.90624200 | -5.27804100 |
| C | -5.04751900 | 6.82400100 | -0.32882300 |
| H | -4.13410400 | 7.26819500 | 0.08389400  |
| H | -5.89935900 | 7.31609600 | 0.15846300  |
| H | -5.07625500 | 5.77361400 | -0.01756200 |
| H | -6.80376700 | 4.41921200 | -1.32128200 |
| H | -5.60081100 | 8.64109100 | -4.81089600 |

**59. NHC\_Full\_C<sub>2</sub>H<sub>5</sub>\_H (planar)-singlet:**

|   |             |             |             |
|---|-------------|-------------|-------------|
| N | -8.57839300 | 3.27971500  | -1.51149200 |
| C | -6.93607100 | 1.84691900  | -1.69798200 |
| C | -8.18225600 | 1.99860000  | -1.21225000 |
| C | -7.60192600 | 3.96857000  | -2.21640300 |
| C | -6.86724800 | 6.52135400  | -3.12296700 |
| C | -7.22632300 | 7.91982700  | -3.16917000 |
| C | -5.85813300 | 6.05251000  | -4.16778700 |
| H | -5.04245900 | 5.46578400  | -3.73763800 |
| H | -5.36783700 | 6.89643400  | -4.65066000 |
| C | -8.23498000 | 8.38859400  | -2.12387100 |
| H | -8.72689600 | 7.54480900  | -1.64236800 |
| H | -9.04939600 | 8.97747200  | -2.55329100 |
| N | -7.51446600 | 11.40229400 | -3.99296000 |
| N | -5.51490200 | 11.16137100 | -4.78078800 |
| C | -7.15706000 | 12.59444300 | -4.59445900 |
| C | -5.91088500 | 12.44252200 | -5.08016600 |
| B | -6.37043700 | 8.94368400  | -3.86471200 |
| B | -7.72320000 | 5.49758800  | -2.42740200 |
| C | -6.49151400 | 10.47269900 | -4.07582600 |

|   |              |             |             |
|---|--------------|-------------|-------------|
| C | -9.72564400  | 3.86150800  | -0.88575900 |
| C | -10.97013000 | 3.77514000  | -1.51641300 |
| C | -9.54356700  | 4.47130500  | 0.36009400  |
| C | -12.06068800 | 4.35043000  | -0.86518300 |
| C | -10.66182100 | 5.03901200  | 0.96803800  |
| C | -11.90645700 | 4.98387000  | 0.35999900  |
| H | -13.04374000 | 4.30523800  | -1.32404600 |
| H | -12.76741700 | 5.43265500  | 0.84750600  |
| H | -10.54860600 | 5.53316100  | 1.93070500  |
| C | -8.19049900  | 4.54618300  | 1.04312600  |
| C | -8.23365200  | 3.90595300  | 2.43143600  |
| H | -8.58485300  | 2.86936300  | 2.38930600  |
| H | -8.89987400  | 4.45839100  | 3.10509200  |
| H | -7.23341600  | 3.91055200  | 2.88074900  |
| C | -7.69913900  | 5.99345600  | 1.13861700  |
| H | -7.46349000  | 3.97788300  | 0.44749500  |
| H | -6.72737100  | 6.03097900  | 1.64827300  |
| H | -8.40100800  | 6.60385800  | 1.72144000  |
| H | -7.58650300  | 6.45044400  | 0.14725200  |
| C | -11.10778100 | 3.13007100  | -2.88172100 |
| C | -12.48632400 | 2.51864900  | -3.11624200 |
| H | -12.48403300 | 1.93004200  | -4.03903400 |
| H | -13.25171700 | 3.29428100  | -3.23772400 |
| H | -12.79567000 | 1.86514000  | -2.29347200 |
| C | -10.79369600 | 4.15090600  | -3.98094000 |
| H | -10.36407600 | 2.32246600  | -2.94539500 |
| H | -10.89709800 | 3.69291800  | -4.97149300 |
| H | -9.78168700  | 4.56189900  | -3.89089000 |
| H | -11.49815100 | 4.99023500  | -3.91988900 |
| C | -4.36847000  | 10.57913500 | -5.40764500 |
| C | -3.12329000  | 10.66521200 | -4.77832800 |
| C | -3.43454400  | 9.40158100  | -7.26253300 |
| C | -2.18922200  | 9.45651600  | -6.65587700 |
| C | -2.03353200  | 10.08983700 | -5.43081600 |

|   |             |             |             |
|---|-------------|-------------|-------------|
| H | -1.32887200 | 9.00764400  | -7.14437900 |
| H | -1.04995700 | 10.13485400 | -4.97305500 |
| C | -2.98415900 | 11.31025400 | -3.41316100 |
| C | -3.29815500 | 10.28970400 | -2.31365800 |
| H | -4.31027000 | 9.87888600  | -2.40332800 |
| H | -3.19435600 | 10.74784700 | -1.32321900 |
| H | -2.59391100 | 9.45020800  | -2.37475100 |
| C | -1.60505000 | 11.92075400 | -3.17967700 |
| H | -3.72726800 | 12.11837200 | -3.34901000 |
| H | -1.60614000 | 12.50899600 | -2.25664900 |
| H | -1.29608800 | 12.57442400 | -4.00246300 |
| H | -0.84001400 | 11.14460400 | -3.05924100 |
| C | -4.55203700 | 9.96944300  | -6.65333300 |
| C | -5.90583200 | 9.89502300  | -7.33498500 |
| C | -6.39754400 | 8.44788200  | -7.43066400 |
| H | -7.36973100 | 8.41078200  | -7.93954600 |
| H | -6.50948700 | 7.99048500  | -6.43940300 |
| H | -5.69629400 | 7.83757500  | -8.01432700 |
| C | -5.86402600 | 10.53588900 | -8.72304500 |
| H | -6.63215600 | 10.46315900 | -6.73837400 |
| H | -5.51265100 | 11.57241500 | -8.68078600 |
| H | -6.86473900 | 10.53163400 | -9.17131200 |
| H | -5.19856600 | 9.98367700  | -9.39764200 |
| H | -3.54889000 | 8.90752600  | -8.22511500 |
| N | -6.57879800 | 3.03917700  | -2.29946500 |
| C | -5.22750400 | 3.24233900  | -2.71746300 |
| C | -4.76758400 | 2.57096000  | -3.85989200 |
| C | -4.38809100 | 4.04621300  | -1.92873300 |
| C | -3.42992600 | 2.74259200  | -4.21682900 |
| C | -2.58205500 | 3.53370400  | -3.45850500 |
| C | -3.05815800 | 4.17224500  | -2.32328200 |
| H | -3.04887700 | 2.23649200  | -5.10012800 |
| H | -1.54311900 | 3.65236800  | -3.75276200 |
| H | -2.38874000 | 4.79031500  | -1.73179100 |

|   |              |             |             |
|---|--------------|-------------|-------------|
| C | -4.87974500  | 4.76028000  | -0.68479500 |
| C | -4.33340200  | 6.18167000  | -0.56608800 |
| H | -3.25725900  | 6.20426300  | -0.35470600 |
| H | -4.83667000  | 6.70095200  | 0.25866400  |
| H | -4.52575800  | 6.75393700  | -1.48384300 |
| C | -4.58382400  | 3.91942000  | 0.55807400  |
| H | -5.96301700  | 4.86970000  | -0.76291600 |
| H | -3.50411700  | 3.77327400  | 0.69368700  |
| H | -5.05154300  | 2.92807100  | 0.48346900  |
| H | -4.97591000  | 4.40992500  | 1.45941600  |
| C | -5.64024300  | 1.62862700  | -4.67116600 |
| C | -5.51944900  | 1.84753100  | -6.17999900 |
| H | -5.71226300  | 2.88341600  | -6.46374500 |
| H | -6.23538500  | 1.20761000  | -6.70677200 |
| H | -4.52176800  | 1.57336700  | -6.54208200 |
| C | -5.26226800  | 0.17501900  | -4.36107500 |
| H | -6.68791500  | 1.79492300  | -4.38602800 |
| H | -4.22151600  | -0.00772100 | -4.65841600 |
| H | -5.89733400  | -0.52116700 | -4.92002500 |
| H | -5.34317000  | -0.06935000 | -3.29791200 |
| H | -5.26534800  | 13.11446500 | -5.62229500 |
| H | -7.84324400  | 13.42389400 | -4.62850100 |
| H | -8.82774300  | 1.32646300  | -0.67030100 |
| H | -6.24976100  | 1.01757400  | -1.66398200 |
| C | -8.86526500  | 11.19933500 | -3.57325200 |
| C | -9.32334800  | 11.86939200 | -2.42932800 |
| C | -9.70573600  | 10.39579900 | -4.36121300 |
| C | -10.66039800 | 11.69717900 | -2.07038400 |
| C | -11.03505200 | 10.26932500 | -3.96476100 |
| C | -11.50939000 | 10.90676700 | -2.82818000 |
| H | -11.04011400 | 12.20225400 | -1.18593500 |
| H | -11.70527800 | 9.65146700  | -4.55554500 |
| H | -12.54782600 | 10.78765500 | -2.53233500 |
| C | -9.21525400  | 9.68176600  | -5.60563400 |

|   |              |             |             |
|---|--------------|-------------|-------------|
| C | -9.76313200  | 8.26101500  | -5.72479700 |
| H | -9.57167600  | 7.68838400  | -4.80707700 |
| H | -9.26013100  | 7.74134600  | -6.54945600 |
| H | -10.83923200 | 8.23958200  | -5.93654200 |
| C | -9.51024500  | 10.52341200 | -6.84819000 |
| H | -8.13209100  | 9.57101700  | -5.52762100 |
| H | -10.58977400 | 10.67095400 | -6.98366500 |
| H | -9.11884000  | 10.03272600 | -7.74973500 |
| H | -9.04126500  | 11.51414900 | -6.77332400 |
| C | -8.44952000  | 12.81129600 | -1.61885600 |
| C | -8.82731600  | 14.26505600 | -1.92846600 |
| H | -8.19136600  | 14.96100100 | -1.37022100 |
| H | -9.86768000  | 14.44813700 | -1.62996800 |
| H | -8.74749400  | 14.50937500 | -2.99171800 |
| C | -8.56876800  | 12.59227800 | -0.10993500 |
| H | -7.40222000  | 12.64470300 | -1.90520600 |
| H | -7.85213400  | 13.23198300 | 0.41614900  |
| H | -8.37591100  | 11.55628800 | 0.17348400  |
| H | -9.56598300  | 12.86666000 | 0.25325700  |
| C | -7.54223000  | 9.20113000  | -1.03040500 |
| H | -6.67298300  | 8.64362600  | -0.64783900 |
| H | -7.16180600  | 10.16310300 | -1.40442500 |
| H | -8.21821800  | 9.40143100  | -0.18768900 |
| C | -6.54971900  | 5.23744600  | -5.26013600 |
| H | -5.87310200  | 5.03636300  | -6.10212700 |
| H | -6.92951800  | 4.27575300  | -4.88482000 |
| H | -7.41916200  | 5.79364300  | -5.64411400 |
| H | -8.76441600  | 5.80153400  | -1.93523000 |
| H | -5.32947300  | 8.63963100  | -4.35737500 |

**60. NHC\_Full\_C<sub>2</sub>H<sub>5</sub>\_H (planar)-triplet:**

|   |              |             |             |
|---|--------------|-------------|-------------|
| N | -8.47339800  | 3.41546300  | -1.12448500 |
| C | -6.87796200  | 1.96504000  | -1.54452600 |
| C | -8.03106900  | 2.13538700  | -0.87066300 |
| C | -7.63679900  | 4.06447400  | -2.02195100 |
| C | -6.90943300  | 6.53794800  | -3.14961400 |
| C | -7.18378400  | 7.90265900  | -3.14232000 |
| C | -6.36233600  | 5.95854200  | -4.45963500 |
| H | -5.36189900  | 5.51906800  | -4.33862100 |
| H | -6.23835300  | 6.76367100  | -5.18971100 |
| C | -7.73111500  | 8.48203400  | -1.83235700 |
| H | -7.85484500  | 7.67691700  | -1.10224000 |
| H | -8.73175400  | 8.92101900  | -1.95348100 |
| N | -7.46607600  | 11.30771700 | -4.04742700 |
| N | -5.61995800  | 11.02532600 | -5.16735000 |
| C | -7.21560600  | 12.47553700 | -4.74736100 |
| C | -6.06244500  | 12.30535400 | -5.42117300 |
| B | -6.38411900  | 8.86962900  | -4.06323600 |
| B | -7.70914500  | 5.57102200  | -2.22866100 |
| C | -6.45648200  | 10.37619800 | -4.26993300 |
| C | -9.69624000  | 3.93583400  | -0.60910200 |
| C | -10.76126800 | 4.23034500  | -1.47231500 |
| C | -9.77752400  | 4.14175700  | 0.77845800  |
| C | -11.94629800 | 4.68751000  | -0.89577700 |
| C | -10.99099000 | 4.58081700  | 1.30403300  |

|   |              |             |             |
|---|--------------|-------------|-------------|
| C | -12.07119600 | 4.84447800  | 0.47505100  |
| H | -12.78839000 | 4.92034300  | -1.54359200 |
| H | -13.00943500 | 5.19021300  | 0.89955700  |
| H | -11.08381200 | 4.74233400  | 2.37376700  |
| C | -8.54013800  | 4.06159300  | 1.65625300  |
| C | -8.83493700  | 3.68086700  | 3.10383600  |
| H | -9.44065000  | 2.77126000  | 3.17614200  |
| H | -9.36496600  | 4.48218200  | 3.63156600  |
| H | -7.89928200  | 3.51143000  | 3.64606200  |
| C | -7.82432600  | 5.41754500  | 1.59806800  |
| H | -7.85277100  | 3.30939700  | 1.24830900  |
| H | -6.86182800  | 5.37418500  | 2.12543000  |
| H | -8.44321600  | 6.18778500  | 2.07638300  |
| H | -7.64192600  | 5.73642700  | 0.56330800  |
| C | -10.69649600 | 4.08630800  | -2.98386000 |
| C | -11.74458500 | 3.08637200  | -3.47890100 |
| H | -11.65934700 | 2.94717300  | -4.56215800 |
| H | -12.76102000 | 3.44335700  | -3.27296700 |
| H | -11.63231300 | 2.10921800  | -2.99807300 |
| C | -10.89410300 | 5.44208400  | -3.67664400 |
| H | -9.70539500  | 3.71173600  | -3.26759600 |
| H | -10.84856500 | 5.31628600  | -4.76584400 |
| H | -10.12736100 | 6.17356000  | -3.38590500 |
| H | -11.87932100 | 5.86198400  | -3.43429800 |
| C | -4.39677700  | 10.50533100 | -5.68228900 |
| C | -3.33187200  | 10.21150600 | -4.81871000 |
| C | -3.10117100  | 9.86074900  | -7.59495600 |
| C | -2.02110600  | 9.59766000  | -6.76559700 |
| C | -2.14646400  | 9.75477800  | -5.39482800 |
| H | -1.08258100  | 9.25230100  | -7.18977800 |
| H | -1.30443300  | 9.52246800  | -4.74674900 |
| C | -3.39718100  | 10.35591500 | -3.30723200 |
| C | -3.19942500  | 9.00033400  | -2.61414100 |
| H | -3.96580000  | 8.26859800  | -2.90515600 |



|   |             |             |             |
|---|-------------|-------------|-------------|
| H | -3.24548700 | 9.12623900  | -1.52497600 |
| H | -2.21396100 | 8.58074300  | -2.85602500 |
| C | -2.34956000 | 11.35623300 | -2.81199600 |
| H | -4.38849400 | 10.73023500 | -3.02390800 |
| H | -2.43555700 | 11.49594600 | -1.72886600 |
| H | -2.46161100 | 12.33313600 | -3.29338600 |
| H | -1.33293700 | 10.99926000 | -3.01701200 |
| C | -4.31499400 | 10.29931300 | -7.06980400 |
| C | -5.55215000 | 10.37911400 | -7.94795700 |
| C | -6.26804500 | 9.02322300  | -7.88958400 |
| H | -7.23044200 | 9.06655700  | -8.41713400 |
| H | -6.45067300 | 8.70458100  | -6.85479200 |
| H | -5.64914600 | 8.25281800  | -8.36761500 |
| C | -5.25694000 | 10.75941000 | -9.39556900 |
| H | -6.23963800 | 11.13145500 | -7.54045300 |
| H | -4.65128000 | 11.66904500 | -9.46796500 |
| H | -6.19244600 | 10.92861000 | -9.93812800 |
| H | -4.72668200 | 9.95797900  | -9.92289400 |
| H | -3.00791100 | 9.69921500  | -8.66464900 |
| N | -6.62731900 | 3.13284400  | -2.24441600 |
| C | -5.31994200 | 3.48514400  | -2.69763100 |
| C | -4.81502100 | 2.90604800  | -3.87149500 |
| C | -4.56948300 | 4.39257400  | -1.92983000 |
| C | -3.57012900 | 3.33928100  | -4.32609000 |
| C | -2.85902800 | 4.31471200  | -3.64339100 |
| C | -3.34666900 | 4.81866900  | -2.44620600 |
| H | -3.15952800 | 2.91163800  | -5.23697800 |
| H | -1.90529300 | 4.66185200  | -4.03024400 |
| H | -2.75278200 | 5.53283500  | -1.88015600 |
| C | -4.95206200 | 4.79203500  | -0.51415000 |
| C | -4.86588100 | 6.29790300  | -0.27010900 |
| H | -3.83715200 | 6.66308100  | -0.38707000 |
| H | -5.17597700 | 6.53538900  | 0.75407500  |
| H | -5.50494200 | 6.85177900  | -0.96680800 |

|   |              |             |             |
|---|--------------|-------------|-------------|
| C | -4.05020400  | 4.03700600  | 0.46827700  |
| H | -5.98269700  | 4.47245600  | -0.31650700 |
| H | -2.99912500  | 4.32422200  | 0.33651100  |
| H | -4.12245600  | 2.95243900  | 0.32601600  |
| H | -4.33630200  | 4.26793300  | 1.50194600  |
| C | -5.53691100  | 1.79035900  | -4.60305900 |
| C | -5.51339600  | 1.95687100  | -6.12238100 |
| H | -5.84523000  | 2.95138100  | -6.42886100 |
| H | -6.16495500  | 1.21411700  | -6.59454200 |
| H | -4.50556900  | 1.79656300  | -6.52284100 |
| C | -4.89650500  | 0.44568200  | -4.23880200 |
| H | -6.58437800  | 1.78300200  | -4.27219100 |
| H | -3.84996100  | 0.43183700  | -4.56978300 |
| H | -5.41635000  | -0.38390500 | -4.73106700 |
| H | -4.89601500  | 0.25880300  | -3.16008000 |
| H | -5.49640200  | 12.97583300 | -6.04794300 |
| H | -7.89098700  | 13.31362900 | -4.69550100 |
| H | -8.59715500  | 1.46498400  | -0.24385000 |
| H | -6.20270200  | 1.12685200  | -1.59644500 |
| C | -8.77348400  | 10.95512000 | -3.59452000 |
| C | -9.27861700  | 11.53387400 | -2.42058100 |
| C | -9.52363600  | 10.04762300 | -4.36253200 |
| C | -10.52342700 | 11.10025100 | -1.96613700 |
| C | -10.74638400 | 9.62113400  | -3.84631000 |
| C | -11.23422700 | 10.12475900 | -2.64906400 |
| H | -10.93418600 | 11.52761400 | -1.05518700 |
| H | -11.34006300 | 8.90690400  | -4.41250300 |
| H | -12.18789600 | 9.77729700  | -2.26233700 |
| C | -9.14079200  | 9.64848000  | -5.77823400 |
| C | -9.22662400  | 8.14264900  | -6.02251800 |
| H | -8.58740300  | 7.58884100  | -5.32592700 |
| H | -8.91654100  | 7.90538500  | -7.04675300 |
| H | -10.25525900 | 7.77721200  | -5.90555600 |
| C | -10.04267900 | 10.40348900 | -6.76065300 |

|   |              |             |             |
|---|--------------|-------------|-------------|
| H | -8.11020700  | 9.96833700  | -5.97572900 |
| H | -11.09371100 | 10.11598100 | -6.62913600 |
| H | -9.75632800  | 10.17286400 | -7.79432300 |
| H | -9.97072200  | 11.48804300 | -6.61814200 |
| C | -8.55711900  | 12.64971500 | -1.68887700 |
| C | -9.19769600  | 13.99426200 | -2.05332700 |
| H | -8.67823700  | 14.82394000 | -1.56080600 |
| H | -10.24437200 | 14.00783800 | -1.72275200 |
| H | -9.19780100  | 14.18121600 | -3.13203300 |
| C | -8.58101200  | 12.48322300 | -0.16956000 |
| H | -7.50957600  | 12.65727000 | -2.01948300 |
| H | -7.92918200  | 13.22564200 | 0.30274700  |
| H | -8.24974600  | 11.48854300 | 0.13697700  |
| H | -9.58885000  | 12.64403100 | 0.23068300  |
| C | -6.78600600  | 9.50545700  | -1.19007600 |
| H | -5.74688500  | 9.14908100  | -1.23878000 |
| H | -6.80383000  | 10.48680600 | -1.67670500 |
| H | -7.03271300  | 9.65526800  | -0.13210300 |
| C | -7.30792400  | 4.93542000  | -5.10170400 |
| H | -7.06174800  | 4.78579200  | -6.15982700 |
| H | -7.28994900  | 3.95394900  | -4.61532700 |
| H | -8.34698900  | 5.29186100  | -5.05238800 |
| H | -8.64141100  | 5.98955000  | -1.61354700 |
| H | -5.45153000  | 8.45129800  | -4.67805400 |

**61. NHC\_Full\_CH<sub>3</sub>\_H** (fully optimized)-singlet:

|   |              |             |             |
|---|--------------|-------------|-------------|
| N | -9.81201900  | 4.51298000  | -1.32092700 |
| C | -10.72288500 | 6.49015900  | -1.06421300 |
| C | -10.91059000 | 5.17774700  | -0.81929700 |
| C | -8.90442200  | 5.39140600  | -1.86642400 |
| C | -6.56395700  | 5.89943200  | -3.08072500 |
| C | -5.14079300  | 5.80739600  | -3.03104000 |
| C | -7.15655900  | 6.82063900  | -4.12572200 |
| H | -8.24442400  | 6.69888000  | -4.18769600 |
| H | -6.75188500  | 6.58389700  | -5.12286300 |
| H | -6.93277700  | 7.88614100  | -3.94932200 |
| C | -4.54796200  | 4.88640300  | -1.98614300 |
| H | -4.77824900  | 3.82167900  | -2.15822800 |
| H | -4.94703300  | 5.12839200  | -0.98789400 |
| H | -3.45915900  | 5.00286900  | -1.92948600 |
| N | -2.22709500  | 5.06329600  | -4.44019800 |
| N | -1.89192700  | 7.16945100  | -4.80699900 |
| C | -1.00308300  | 5.18348900  | -5.07276200 |
| C | -0.80361100  | 6.49430300  | -5.31707300 |
| B | -4.25098600  | 6.66703600  | -3.86287900 |
| B | -7.45290500  | 5.03589800  | -2.25192000 |
| C | -2.80475800  | 6.29952300  | -4.25695300 |
| C | -9.48541100  | 3.17159200  | -0.94704100 |
| C | -8.93886500  | 2.97726000  | 0.32476800  |
| C | -9.68965000  | 2.13020300  | -1.85657400 |
| C | -8.66573200  | 1.66603300  | 0.71394700  |
| C | -9.39410600  | 0.83818500  | -1.42673900 |
| C | -8.90110300  | 0.60774300  | -0.14862600 |
| H | -8.24621100  | 1.48135200  | 1.70079000  |
| H | -8.67995800  | -0.40776700 | 0.16802900  |

|   |              |             |             |
|---|--------------|-------------|-------------|
| H | -9.53946400  | 0.00090200  | -2.10221800 |
| C | -10.22688400 | 2.42144400  | -3.24340500 |
| C | -11.74956300 | 2.58117400  | -3.20100400 |
| H | -12.05961400 | 3.38091600  | -2.52109700 |
| H | -12.21730000 | 1.64883800  | -2.86015200 |
| H | -12.14576600 | 2.81253800  | -4.19608800 |
| C | -9.84445600  | 1.35887900  | -4.26706500 |
| H | -9.78240500  | 3.37482100  | -3.56535700 |
| H | -10.12285700 | 1.68971300  | -5.27237700 |
| H | -10.37147200 | 0.41449800  | -4.08333100 |
| H | -8.76883800  | 1.15758000  | -4.25973300 |
| C | -8.59353600  | 4.13179200  | 1.24676900  |
| C | -9.40284200  | 4.07464700  | 2.54158900  |
| H | -9.16128200  | 4.93137400  | 3.18200600  |
| H | -9.18071200  | 3.16124800  | 3.10756200  |
| H | -10.48043500 | 4.09080400  | 2.34243800  |
| C | -7.09147600  | 4.15794300  | 1.54028600  |
| H | -8.84586100  | 5.07361000  | 0.74393900  |
| H | -6.84312900  | 5.01408500  | 2.18020000  |
| H | -6.50827300  | 4.23653300  | 0.61494000  |
| H | -6.77504200  | 3.25014800  | 2.06898400  |
| C | -2.20772200  | 8.51470800  | -5.17604800 |
| C | -2.76273800  | 8.71653300  | -6.44299600 |
| C | -2.27100200  | 10.84810300 | -4.69217900 |
| C | -2.77189100  | 11.08553600 | -5.96593100 |
| C | -3.02536000  | 10.03105800 | -6.82813800 |
| H | -2.98496800  | 12.10377800 | -6.27933200 |
| H | -3.45076100  | 10.22160900 | -7.81134800 |
| C | -3.12614600  | 7.56648800  | -7.36359900 |
| C | -4.62928400  | 7.55829100  | -7.65211200 |
| H | -5.21016400  | 7.48921100  | -6.72462500 |
| H | -4.89020200  | 6.70343100  | -8.28876600 |
| H | -4.93661500  | 8.46831100  | -8.18235100 |
| C | -2.32026900  | 7.61342600  | -8.66097200 |

|   |              |             |             |
|---|--------------|-------------|-------------|
| H | -2.88408200  | 6.62180700  | -6.86123000 |
| H | -2.57537800  | 6.76052700  | -9.30125900 |
| H | -1.24235300  | 7.58249400  | -8.46518100 |
| H | -2.53177900  | 8.53032000  | -9.22541800 |
| C | -1.98539000  | 9.55243100  | -4.26656800 |
| C | -1.43961100  | 9.25348700  | -2.88470900 |
| C | -1.80288200  | 10.31792000 | -1.85601300 |
| H | -1.51860400  | 9.98273700  | -0.85378300 |
| H | -2.87656400  | 10.52935800 | -1.85319200 |
| H | -1.26858000  | 11.25756900 | -2.04288100 |
| C | 0.08099600   | 9.07873600  | -2.94022600 |
| H | -1.89070000  | 8.30396300  | -2.56062900 |
| H | 0.37720300   | 8.27693100  | -3.62385400 |
| H | 0.48331100   | 8.84197100  | -1.94887400 |
| H | 0.55507900   | 10.00686300 | -3.28377600 |
| H | -2.11154300  | 11.68282000 | -4.01669500 |
| N | -9.49618800  | 6.62187900  | -1.68931500 |
| C | -8.90050000  | 7.90645500  | -1.90729600 |
| C | -7.81697100  | 8.30172000  | -1.10638800 |
| C | -9.44995300  | 8.73908200  | -2.88957700 |
| C | -7.27505700  | 9.56344600  | -1.34115500 |
| C | -7.81745500  | 10.41790000 | -2.29205900 |
| C | -8.90233000  | 10.01183700 | -3.04899700 |
| H | -6.42591300  | 9.89132100  | -0.75000100 |
| H | -7.38606900  | 11.40320700 | -2.44347300 |
| H | -9.32117200  | 10.67891400 | -3.79843700 |
| C | -10.57601900 | 8.29402300  | -3.80372700 |
| C | -10.25683400 | 8.58177800  | -5.27361900 |
| H | -10.28340800 | 9.65804200  | -5.48008500 |
| H | -11.00332600 | 8.11165200  | -5.92275600 |
| H | -9.26771100  | 8.20936700  | -5.55556200 |
| C | -11.88920300 | 8.98405300  | -3.42569200 |
| H | -10.69996500 | 7.20813100  | -3.69207800 |
| H | -11.77806200 | 10.07252000 | -3.51407700 |

|   |              |            |             |
|---|--------------|------------|-------------|
| H | -12.19450800 | 8.76900400 | -2.39668300 |
| H | -12.70165200 | 8.67535700 | -4.09295600 |
| C | -7.30616600  | 7.45105100 | 0.04001200  |
| C | -5.81899300  | 7.64323300 | 0.31683500  |
| H | -5.23716600  | 7.55863900 | -0.60986800 |
| H | -5.47226500  | 6.86801300 | 1.01118600  |
| H | -5.60283400  | 8.61311600 | 0.78268300  |
| C | -8.15147000  | 7.72448800 | 1.28820900  |
| H | -7.42475700  | 6.39768100 | -0.23536400 |
| H | -8.05730200  | 8.77240700 | 1.60149100  |
| H | -7.82893200  | 7.09176100 | 2.12568700  |
| H | -9.21549800  | 7.52311700 | 1.10576600  |
| H | 0.00251000   | 7.01821700 | -5.80579700 |
| H | -0.41089800  | 4.31279800 | -5.30313600 |
| H | -11.71451700 | 4.64632100 | -0.33509700 |
| H | -11.32543700 | 7.35509000 | -0.83908100 |
| C | -2.83429100  | 3.78476600 | -4.21813000 |
| C | -3.92844900  | 3.40092100 | -5.01040900 |
| C | -2.28587900  | 2.94653000 | -3.24006900 |
| C | -4.48275900  | 2.14571800 | -4.76974500 |
| C | -2.84591100  | 1.67976900 | -3.07567900 |
| C | -3.94180300  | 1.28572000 | -3.82289200 |
| H | -5.34067900  | 1.82689400 | -5.35305900 |
| H | -2.42806100  | 1.00831600 | -2.32960400 |
| H | -4.38311900  | 0.30552300 | -3.66701800 |
| C | -1.14767900  | 3.37943500 | -2.33514400 |
| C | -1.45818300  | 3.09568100 | -0.86260800 |
| H | -2.44091200  | 3.47892300 | -0.57296300 |
| H | -0.70144800  | 3.55788100 | -0.21966400 |
| H | -1.44168800  | 2.01926800 | -0.65587700 |
| C | 0.15466500   | 2.67472000 | -2.72345800 |
| H | -1.01255500  | 4.46384100 | -2.44814300 |
| H | 0.03216700   | 1.58759900 | -2.63352100 |
| H | 0.97591800   | 2.97469100 | -2.06303100 |

|   |             |            |             |
|---|-------------|------------|-------------|
| H | 0.45388800  | 2.88579000 | -3.75508200 |
| C | -4.43774800 | 4.25604900 | -6.15431400 |
| C | -3.59623600 | 3.98135100 | -7.40492000 |
| H | -3.91790500 | 4.61737800 | -8.24025200 |
| H | -3.69650500 | 2.93459800 | -7.72015800 |
| H | -2.53079600 | 4.17710900 | -7.22512800 |
| C | -5.92582600 | 4.06993200 | -6.43035800 |
| H | -4.31457800 | 5.30864300 | -5.87692300 |
| H | -6.27034700 | 4.84866400 | -7.12187400 |
| H | -6.50673300 | 4.15339500 | -5.50301600 |
| H | -6.14532900 | 3.10229400 | -6.89935700 |
| H | -4.62622200 | 7.65100200 | -4.44036800 |
| H | -7.07439500 | 4.05372200 | -1.67365600 |

**62. NHC\_Full\_CH<sub>3</sub>\_H** (fully optimized)-triplet:



|   |              |             |             |
|---|--------------|-------------|-------------|
| N | -9.80760900  | 4.41351600  | -1.43514000 |
| C | -10.58342200 | 6.44137800  | -1.10020700 |
| C | -10.84694300 | 5.13668800  | -0.88935400 |
| C | -8.84662300  | 5.25699900  | -1.96931900 |
| C | -6.51870600  | 5.80751200  | -3.22505900 |
| C | -5.19455300  | 5.88143700  | -2.89872700 |
| C | -7.04714600  | 6.67751600  | -4.34905300 |
| H | -8.13165400  | 6.55288000  | -4.46805800 |
| H | -6.59442000  | 6.40558800  | -5.31211100 |
| H | -6.83551600  | 7.74822100  | -4.19578000 |
| C | -4.66638000  | 5.01125600  | -1.77474600 |
| H | -4.87733600  | 3.94051600  | -1.92860000 |
| H | -5.11994300  | 5.28256800  | -0.81190700 |
| H | -3.58202600  | 5.13640900  | -1.65491900 |
| N | -2.35056000  | 5.16554200  | -4.38135400 |
| N | -1.90580500  | 7.27679200  | -4.68814400 |
| C | -1.12933900  | 5.24925200  | -5.02362300 |
| C | -0.86624300  | 6.55408100  | -5.23415100 |
| B | -4.20742700  | 6.87246900  | -3.58035600 |
| B | -7.50583000  | 4.81683300  | -2.54300300 |
| C | -2.86653400  | 6.43285900  | -4.15418900 |
| C | -9.53861200  | 3.06250800  | -1.05394900 |
| C | -8.93743700  | 2.84959000  | 0.18907300  |
| C | -9.86138300  | 2.02177200  | -1.93004000 |
| C | -8.73084700  | 1.52904400  | 0.58940000  |
| C | -9.63334800  | 0.71931600  | -1.49140100 |
| C | -9.08830800  | 0.47561600  | -0.23649400 |
| H | -8.26694100  | 1.33289000  | 1.55411700  |
| H | -8.92102700  | -0.54770300 | 0.08817500  |
| H | -9.87171500  | -0.11669200 | -2.14184500 |
| C | -10.43582800 | 2.33176900  | -3.29740600 |
| C | -11.94235700 | 2.58836600  | -3.20054600 |
| H | -12.17391600 | 3.41575000  | -2.52269100 |
| H | -12.45462000 | 1.69244400  | -2.82752000 |

|   |              |             |             |
|---|--------------|-------------|-------------|
| H | -12.36139100 | 2.83081600  | -4.18361100 |
| C | -10.15961400 | 1.23724400  | -4.32176700 |
| H | -9.94498500  | 3.25363600  | -3.64555900 |
| H | -10.45642400 | 1.57344000  | -5.32008900 |
| H | -10.73534000 | 0.32881700  | -4.10585100 |
| H | -9.09886300  | 0.96897300  | -4.35323700 |
| C | -8.43826200  | 3.99399900  | 1.04899100  |
| C | -9.10050500  | 4.01775300  | 2.42390000  |
| H | -8.72423100  | 4.86149000  | 3.01469600  |
| H | -8.88677100  | 3.09901200  | 2.98434400  |
| H | -10.18881300 | 4.11699600  | 2.34430900  |
| C | -6.91437600  | 3.91155000  | 1.16276700  |
| H | -8.67614000  | 4.94046500  | 0.54871200  |
| H | -6.50697500  | 4.81963500  | 1.62904400  |
| H | -6.46224700  | 3.79963400  | 0.17074100  |
| H | -6.60978700  | 3.05403500  | 1.77689600  |
| C | -2.17530800  | 8.62778000  | -5.06906200 |
| C | -2.77654700  | 8.84071200  | -6.31205700 |
| C | -2.08154000  | 10.97092400 | -4.63113400 |
| C | -2.62666100  | 11.21466300 | -5.88599800 |
| C | -2.98367100  | 10.16125600 | -6.71211400 |
| H | -2.79435400  | 12.23798000 | -6.21045900 |
| H | -3.44764300  | 10.35741400 | -7.67680000 |
| C | -3.27523500  | 7.69629800  | -7.17226200 |
| C | -4.79917500  | 7.77798900  | -7.28590200 |
| H | -5.25132700  | 7.88917200  | -6.29380300 |
| H | -5.20610500  | 6.86990900  | -7.75259900 |
| H | -5.10425700  | 8.63563300  | -7.89960700 |
| C | -2.61311900  | 7.67329800  | -8.54724600 |
| H | -3.03683100  | 6.74979200  | -6.67231100 |
| H | -2.98898300  | 6.82950300  | -9.13822300 |
| H | -1.52474600  | 7.57464900  | -8.46779900 |
| H | -2.82743400  | 8.59206400  | -9.10742600 |
| C | -1.85297300  | 9.66847300  | -4.19275700 |

|   |              |             |             |
|---|--------------|-------------|-------------|
| C | -1.27843600  | 9.35846200  | -2.82543200 |
| C | -1.55507000  | 10.45272300 | -1.80090300 |
| H | -1.25822800  | 10.11645200 | -0.80261600 |
| H | -2.61591600  | 10.72063700 | -1.76947400 |
| H | -0.97963400  | 11.36138200 | -2.01661900 |
| C | 0.22818000   | 9.10239000  | -2.92229200 |
| H | -1.76896600  | 8.43637800  | -2.47741900 |
| H | 0.46003400   | 8.27516900  | -3.60024500 |
| H | 0.64727400   | 8.85995600  | -1.93924900 |
| H | 0.74015100   | 9.99853300  | -3.29519000 |
| H | -1.84352800  | 11.80689400 | -3.98051100 |
| N | -9.36219000  | 6.52454800  | -1.74252000 |
| C | -8.75214000  | 7.77845500  | -2.05877100 |
| C | -7.59416800  | 8.17483000  | -1.36523700 |
| C | -9.33920900  | 8.57459700  | -3.05110600 |
| C | -7.00478200  | 9.38114500  | -1.73836400 |
| C | -7.57923400  | 10.19447300 | -2.70660600 |
| C | -8.74658200  | 9.80408600  | -3.33964100 |
| H | -6.08835700  | 9.70032300  | -1.25377700 |
| H | -7.10722400  | 11.13715600 | -2.96827900 |
| H | -9.19053600  | 10.44173300 | -4.09998200 |
| C | -10.55268800 | 8.13066300  | -3.84780100 |
| C | -10.35636300 | 8.33775400  | -5.35252000 |
| H | -10.36952400 | 9.40289200  | -5.61105000 |
| H | -11.17213600 | 7.86308700  | -5.90821600 |
| H | -9.40920800  | 7.91904300  | -5.70411800 |
| C | -11.80378700 | 8.89062600  | -3.39831300 |
| H | -10.70499400 | 7.05668500  | -3.67361800 |
| H | -11.66163300 | 9.96740500  | -3.55755300 |
| H | -12.02631700 | 8.74389100  | -2.33696300 |
| H | -12.68109800 | 8.57964900  | -3.97647700 |
| C | -7.05319000  | 7.36539600  | -0.20255200 |
| C | -5.61514600  | 7.71556900  | 0.16230600  |
| H | -4.95504400  | 7.68790200  | -0.71403800 |

|   |              |            |             |
|---|--------------|------------|-------------|
| H | -5.23684000  | 6.99575900 | 0.89835000  |
| H | -5.54709700  | 8.71082000 | 0.62009000  |
| C | -7.95229000  | 7.55093800 | 1.02719800  |
| H | -7.07387400  | 6.30183000 | -0.48711400 |
| H | -7.93147800  | 8.59634100 | 1.36066900  |
| H | -7.59798700  | 6.92696700 | 1.85917200  |
| H | -8.99586200  | 7.28187100 | 0.82955500  |
| H | -0.04322600  | 7.04501000 | -5.72890800 |
| H | -0.58151900  | 4.35916500 | -5.28709100 |
| H | -11.67013000 | 4.64615600 | -0.39448800 |
| H | -11.13098100 | 7.33170700 | -0.83701200 |
| C | -2.96012700  | 3.91136500 | -4.06520900 |
| C | -4.11777900  | 3.51451000 | -4.75898000 |
| C | -2.37287200  | 3.11546700 | -3.07279600 |
| C | -4.70660900  | 2.30784200 | -4.38612700 |
| C | -2.96495500  | 1.88566300 | -2.78447400 |
| C | -4.13193300  | 1.49471600 | -3.41784200 |
| H | -5.62273100  | 1.98820400 | -4.87097600 |
| H | -2.52085900  | 1.24818200 | -2.02407700 |
| H | -4.60349500  | 0.55174900 | -3.15638200 |
| C | -1.15971000  | 3.55994800 | -2.27591800 |
| C | -1.35595500  | 3.35241300 | -0.77125400 |
| H | -2.30336200  | 3.77048000 | -0.41957700 |
| H | -0.54047800  | 3.82745100 | -0.21544400 |
| H | -1.34215300  | 2.28722900 | -0.51294900 |
| C | 0.09186700   | 2.80082100 | -2.72550400 |
| H | -1.00803500  | 4.63405300 | -2.44987500 |
| H | -0.04969200  | 1.72391700 | -2.56658300 |
| H | 0.96893900   | 3.11213600 | -2.14715900 |
| H | 0.31443000   | 2.94799900 | -3.78678300 |
| C | -4.65902700  | 4.32394800 | -5.92154500 |
| C | -3.75971200  | 4.13917800 | -7.15125700 |
| H | -4.11420600  | 4.76325600 | -7.98307500 |
| H | -3.78005100  | 3.09386700 | -7.48504700 |

|   |             |            |             |
|---|-------------|------------|-------------|
| H | -2.71627500 | 4.40863200 | -6.95343400 |
| C | -6.09683700 | 3.97308800 | -6.28661700 |
| H | -4.63894400 | 5.38745300 | -5.63669000 |
| H | -6.47550400 | 4.69285100 | -7.02251100 |
| H | -6.75696700 | 4.00017900 | -5.41028300 |
| H | -6.16432200 | 2.97792100 | -6.74466500 |
| H | -4.46012700 | 8.04338300 | -3.71535000 |
| H | -7.25330100 | 3.64593100 | -2.40753300 |

**63. NHC\_Full\_CH<sub>3</sub>\_H** (twisted)-singlet:

|   |              |            |             |
|---|--------------|------------|-------------|
| N | -9.38345900  | 4.86577200 | -0.43326200 |
| C | -10.42959800 | 6.79930700 | -0.44980200 |
| C | -10.49947800 | 5.53844100 | 0.02115200  |
| C | -8.60041600  | 5.68992500 | -1.22479000 |
| C | -6.33492600  | 6.23025900 | -2.72073300 |

|   |              |             |             |
|---|--------------|-------------|-------------|
| C | -6.41964200  | 6.25824900  | -4.07608700 |
| C | -5.34817200  | 7.13591400  | -2.01996700 |
| H | -5.84092900  | 8.04334500  | -1.64091300 |
| H | -4.54436000  | 7.47306300  | -2.69268400 |
| H | -4.88497700  | 6.64707600  | -1.14912100 |
| C | -7.40639600  | 5.35259200  | -4.77685100 |
| H | -7.86959700  | 5.84143000  | -5.64769600 |
| H | -8.21020500  | 5.01544000  | -4.10413200 |
| H | -6.91363900  | 4.44516300  | -5.15591000 |
| N | -3.46592200  | 5.59537500  | -5.57297900 |
| N | -3.37110800  | 7.62273600  | -6.36355900 |
| C | -2.32497100  | 5.68920000  | -6.34702600 |
| C | -2.25509000  | 6.95006700  | -6.81797600 |
| B | -5.50210500  | 7.16455700  | -4.97799200 |
| B | -7.25246100  | 5.32394900  | -1.81882700 |
| C | -4.15415100  | 6.79858100  | -5.57203300 |
| C | -9.12748600  | 3.49432700  | -0.13348700 |
| C | -8.72316000  | 3.16995400  | 1.17174500  |
| C | -9.32236400  | 2.52120500  | -1.11944000 |
| C | -8.54818900  | 1.82294100  | 1.48258700  |
| C | -9.12514200  | 1.18722900  | -0.76035000 |
| C | -8.75153900  | 0.83836600  | 0.52624800  |
| H | -8.24040600  | 1.53953000  | 2.48419800  |
| H | -8.61225900  | -0.20694000 | 0.78743300  |
| H | -9.27973200  | 0.41240300  | -1.50771100 |
| C | -9.74379200  | 2.84685700  | -2.53904600 |
| C | -11.13266300 | 2.27825800  | -2.83478800 |
| H | -11.88641100 | 2.66635800  | -2.14167700 |
| H | -11.13258900 | 1.18446000  | -2.74824500 |
| H | -11.44373800 | 2.52964200  | -3.85461500 |
| C | -8.71348300  | 2.31133600  | -3.53626700 |
| H | -9.78374800  | 3.93772600  | -2.65322700 |
| H | -8.96713700  | 2.61521200  | -4.55888200 |
| H | -8.67902500  | 1.21433100  | -3.51459600 |

|   |             |             |              |
|---|-------------|-------------|--------------|
| H | -7.71243500 | 2.69580700  | -3.31039900  |
| C | -8.37662000 | 4.25120200  | 2.17877900   |
| C | -8.53002700 | 3.80359400  | 3.62942100   |
| H | -8.41790200 | 4.66139000  | 4.29976500   |
| H | -7.75590000 | 3.07970500  | 3.90994200   |
| H | -9.50629000 | 3.34547300  | 3.82086400   |
| C | -6.93936400 | 4.72153800  | 1.92515600   |
| H | -9.04509600 | 5.10993200  | 2.02200500   |
| H | -6.65172100 | 5.49358500  | 2.64819900   |
| H | -6.81094000 | 5.12572900  | 0.91146500   |
| H | -6.24674300 | 3.87752100  | 2.03724800   |
| C | -3.62707800 | 8.99418200  | -6.66332900  |
| C | -4.03140000 | 9.31856200  | -7.96856100  |
| C | -3.62941500 | 11.30127900 | -6.03645700  |
| C | -4.00301400 | 11.65014700 | -7.32305500  |
| C | -4.20636600 | 10.66557700 | -8.27939800  |
| H | -4.14229100 | 12.69545500 | -7.58423700  |
| H | -4.51414500 | 10.94899200 | -9.28100900  |
| C | -4.37794200 | 8.23731800  | -8.97559900  |
| C | -5.81519700 | 7.76698000  | -8.72197400  |
| H | -5.94361900 | 7.36279000  | -7.70828300  |
| H | -6.10283900 | 6.99493300  | -9.44501700  |
| H | -6.50781800 | 8.61099700  | -8.83406600  |
| C | -4.22453800 | 8.68493300  | -10.42623900 |
| H | -3.70946500 | 7.37858700  | -8.81883000  |
| H | -4.33666700 | 7.82713900  | -11.09658600 |
| H | -3.24827500 | 9.14305300  | -10.61768300 |
| H | -4.99866500 | 9.40882400  | -10.70675500 |
| C | -3.43219700 | 9.96730100  | -5.67737200  |
| C | -3.01077100 | 9.64164300  | -4.25776800  |
| C | -4.04107800 | 10.17716500 | -3.26054400  |
| H | -3.78742300 | 9.87328700  | -2.23793000  |
| H | -5.04212600 | 9.79269600  | -3.48641200  |
| H | -4.07553300 | 11.27417000 | -3.28221300  |

|   |              |             |             |
|---|--------------|-------------|-------------|
| C | -1.62189800  | 10.21023500 | -3.96202400 |
| H | -2.97081900  | 8.55077400  | -4.14359000 |
| H | -0.86815100  | 9.82213400  | -4.65513600 |
| H | -1.31082400  | 9.95884700  | -2.94219800 |
| H | -1.62196700  | 11.30403400 | -4.04856400 |
| H | -3.47482300  | 12.07610100 | -5.28909400 |
| N | -9.28864600  | 6.89313100  | -1.22384900 |
| C | -8.65606000  | 8.14511300  | -1.50799200 |
| C | -8.01779700  | 8.80489700  | -0.45348600 |
| C | -8.68228800  | 8.64829000  | -2.81560000 |
| C | -7.42663700  | 10.04152900 | -0.72938100 |
| C | -7.40448800  | 10.54175200 | -2.01924600 |
| C | -8.00928300  | 9.84223400  | -3.05941300 |
| H | -6.94985700  | 10.59651100 | 0.07503700  |
| H | -6.90315700  | 11.48375800 | -2.22629300 |
| H | -7.96746000  | 10.24039700 | -4.06888000 |
| C | -9.48351500  | 7.93484200  | -3.88385000 |
| C | -9.08946700  | 8.31788200  | -5.30436700 |
| H | -9.38011800  | 9.35253200  | -5.52848800 |
| H | -9.61498200  | 7.67666900  | -6.02022800 |
| H | -8.01394100  | 8.21751500  | -5.47822800 |
| C | -10.97631500 | 8.22248000  | -3.68002700 |
| H | -9.31757200  | 6.85689600  | -3.75018300 |
| H | -11.16782400 | 9.29911300  | -3.77111700 |
| H | -11.33411900 | 7.89803800  | -2.69868500 |
| H | -11.57421600 | 7.70975600  | -4.44200000 |
| C | -7.93702200  | 8.23180700  | 0.95108800  |
| C | -6.49594800  | 8.20980000  | 1.46039700  |
| H | -5.86811800  | 7.57416800  | 0.82598500  |
| H | -6.46017800  | 7.81811600  | 2.48287700  |
| H | -6.05612400  | 9.21313100  | 1.48188800  |
| C | -8.83525800  | 9.02883400  | 1.89869000  |
| H | -8.28706000  | 7.18895800  | 0.93393100  |
| H | -8.51428800  | 10.07758100 | 1.94052100  |



|   |              |            |             |
|---|--------------|------------|-------------|
| H | -8.79134200  | 8.62373200 | 2.91581700  |
| H | -9.88027300  | 9.01490400 | 1.56929700  |
| H | -1.51277900  | 7.44799200 | -7.42100200 |
| H | -1.67251800  | 4.84092700 | -6.48134000 |
| H | -11.24178900 | 5.04051800 | 0.62417900  |
| H | -11.08205200 | 7.64758000 | -0.31549100 |
| C | -4.09850800  | 4.34339400 | -5.28883500 |
| C | -4.73677400  | 3.68361000 | -6.34334100 |
| C | -4.07227900  | 3.84021600 | -3.98122800 |
| C | -5.32793500  | 2.44697900 | -6.06744500 |
| C | -4.74528500  | 2.64627300 | -3.73741300 |
| C | -5.35008300  | 1.94675600 | -4.77758000 |
| H | -5.80471800  | 1.89199800 | -6.87186200 |
| H | -4.78710700  | 2.24810900 | -2.72794700 |
| H | -5.85141500  | 1.00475000 | -4.57053300 |
| C | -3.27105100  | 4.55366300 | -2.91297800 |
| C | -3.66509700  | 4.17062400 | -1.49246100 |
| H | -4.74062200  | 4.27099200 | -1.31859900 |
| H | -3.13958100  | 4.81183700 | -0.77660100 |
| H | -3.37444600  | 3.13597400 | -1.26834000 |
| C | -1.77825100  | 4.26602400 | -3.11680300 |
| H | -3.43699300  | 5.63160900 | -3.04664500 |
| H | -1.58674200  | 3.18939200 | -3.02571300 |
| H | -1.18034800  | 4.77874800 | -2.35483100 |
| H | -1.42044800  | 4.59046600 | -4.09814600 |
| C | -4.81755100  | 4.25670000 | -7.74791500 |
| C | -3.91933100  | 3.45966100 | -8.69552200 |
| H | -3.96324800  | 3.86476400 | -9.71264800 |
| H | -4.24031500  | 2.41091800 | -8.73735300 |
| H | -2.87431400  | 3.47357700 | -8.36613500 |
| C | -6.25862800  | 4.27872600 | -8.25721300 |
| H | -4.46749900  | 5.29954500 | -7.73076200 |
| H | -6.29440000  | 4.67039900 | -9.27969700 |
| H | -6.88644100  | 4.91437700 | -7.62280300 |

|   |             |            |             |
|---|-------------|------------|-------------|
| H | -6.69847000 | 3.27540200 | -8.27868700 |
| H | -6.92259300 | 4.19489900 | -1.55159800 |
| H | -5.83196900 | 8.29360900 | -5.24521600 |

**64. NHC\_Full\_CH<sub>3</sub>\_H (twisted)-triplet:**

|   |              |            |             |
|---|--------------|------------|-------------|
| N | -9.55557700  | 4.74385900 | -0.74267500 |
| C | -10.53427900 | 6.71039300 | -0.65028000 |
| C | -10.67297700 | 5.41794900 | -0.29382600 |
| C | -8.70132500  | 5.60087200 | -1.41764300 |
| C | -6.34886000  | 6.17606600 | -2.75184000 |
| C | -6.37219600  | 6.32931700 | -4.09937500 |
| C | -5.37833700  | 6.99424600 | -1.92451900 |
| H | -5.87201700  | 7.88183200 | -1.50232100 |
| H | -4.52219900  | 7.36267000 | -2.51010400 |
| H | -4.98647600  | 6.42342600 | -1.06940500 |

|   |              |             |             |
|---|--------------|-------------|-------------|
| C | -7.32812800  | 5.51056000  | -4.94096200 |
| H | -7.57409800  | 6.01442800  | -5.88969300 |
| H | -8.26671600  | 5.26941700  | -4.42077300 |
| H | -6.87752500  | 4.54365200  | -5.20439400 |
| N | -3.42263600  | 5.62286900  | -5.49138100 |
| N | -3.13208800  | 7.70870700  | -6.04378900 |
| C | -2.21853400  | 5.71868700  | -6.16285800 |
| C | -2.03519200  | 7.01203300  | -6.49852900 |
| B | -5.36994600  | 7.28025000  | -4.84824500 |
| B | -7.34299000  | 5.22925600  | -1.98120000 |
| C | -4.01476900  | 6.87346900  | -5.38489200 |
| C | -9.36477400  | 3.34231100  | -0.55827000 |
| C | -9.04851300  | 2.88542700  | 0.73148900  |
| C | -9.53121200  | 2.47184800  | -1.64074800 |
| C | -8.93677700  | 1.51001800  | 0.92482000  |
| C | -9.39903600  | 1.10414900  | -1.39717000 |
| C | -9.11475600  | 0.62550500  | -0.12956700 |
| H | -8.69885600  | 1.12451000  | 1.91123900  |
| H | -9.02561000  | -0.44383100 | 0.04038800  |
| H | -9.53317700  | 0.40709300  | -2.22113900 |
| C | -9.85603500  | 2.94144500  | -3.04578000 |
| C | -11.24187300 | 2.45393800  | -3.47193300 |
| H | -12.02333400 | 2.80520500  | -2.78997300 |
| H | -11.28189600 | 1.35755800  | -3.48777600 |
| H | -11.48278900 | 2.80838900  | -4.48009000 |
| C | -8.78485900  | 2.46080500  | -4.02819400 |
| H | -9.85458100  | 4.03914000  | -3.05995400 |
| H | -8.96668400  | 2.86563700  | -5.03141300 |
| H | -8.78762600  | 1.36595600  | -4.10751100 |
| H | -7.78695000  | 2.78346000  | -3.71018300 |
| C | -8.72738800  | 3.85914600  | 1.85065400  |
| C | -8.96419100  | 3.28508000  | 3.24422000  |
| H | -8.86239300  | 4.07356200  | 3.99636000  |
| H | -8.22454300  | 2.51447300  | 3.49147100  |

|   |             |             |              |
|---|-------------|-------------|--------------|
| H | -9.96066600 | 2.84208500  | 3.34619000   |
| C | -7.26866600 | 4.31081800  | 1.71132500   |
| H | -9.36626200 | 4.74747000  | 1.74247200   |
| H | -7.00288600 | 5.01266500  | 2.51042200   |
| H | -7.07781000 | 4.79363600  | 0.74294600   |
| H | -6.60193200 | 3.44233400  | 1.78734200   |
| C | -3.42065000 | 9.06349800  | -6.37087800  |
| C | -3.89880300 | 9.33180700  | -7.66000100  |
| C | -3.54464500 | 11.37243100 | -5.77811500  |
| C | -3.97921900 | 11.67309100 | -7.06037700  |
| C | -4.16612200 | 10.65985900 | -7.98917700  |
| H | -4.19005500 | 12.70335400 | -7.33338700  |
| H | -4.54542800 | 10.89749700 | -8.98021500  |
| C | -4.22861600 | 8.21951200  | -8.63774500  |
| C | -5.74469300 | 7.99990600  | -8.66574500  |
| H | -6.13790500 | 7.78092200  | -7.66211700  |
| H | -5.99579500 | 7.16302000  | -9.33109900  |
| H | -6.25547400 | 8.89637800  | -9.04122600  |
| C | -3.70378900 | 8.48855200  | -10.04643800 |
| H | -3.76506000 | 7.28866000  | -8.28517200  |
| H | -3.89252700 | 7.62199900  | -10.69056100 |
| H | -2.62726500 | 8.68778000  | -10.05018300 |
| H | -4.20571000 | 9.34720900  | -10.50769300 |
| C | -3.26750000 | 10.05876200 | -5.40114600  |
| C | -2.84594900 | 9.75424800  | -3.97681900  |
| C | -3.91741000 | 10.22176700 | -2.98792600  |
| H | -3.65545100 | 9.92352000  | -1.96557100  |
| H | -4.89324100 | 9.78466400  | -3.22663100  |
| H | -4.01319000 | 11.31568700 | -3.00055500  |
| C | -1.49730300 | 10.39999100 | -3.65625600  |
| H | -2.74937500 | 8.66558700  | -3.87050100  |
| H | -0.71039800 | 10.06015600 | -4.33746800  |
| H | -1.18858500 | 10.16518400 | -2.63179000  |
| H | -1.56100600 | 11.49229000 | -3.74035100  |

|   |              |             |             |
|---|--------------|-------------|-------------|
| H | -3.42348400  | 12.16909600 | -5.04724800 |
| N | -9.34845500  | 6.82580700  | -1.35018500 |
| C | -8.66277600  | 8.07306000  | -1.49853500 |
| C | -8.06139300  | 8.62517000  | -0.36381200 |
| C | -8.60365000  | 8.67810700  | -2.76116700 |
| C | -7.41505200  | 9.85629200  | -0.51081900 |
| C | -7.30660400  | 10.45371300 | -1.75444800 |
| C | -7.87953100  | 9.86118500  | -2.87605300 |
| H | -6.96240300  | 10.32846300 | 0.35789200  |
| H | -6.76277300  | 11.38899100 | -1.86023800 |
| H | -7.77158300  | 10.33361800 | -3.84819600 |
| C | -9.37665300  | 8.08349700  | -3.91835400 |
| C | -8.88063400  | 8.52869800  | -5.28811200 |
| H | -9.11084500  | 9.58725300  | -5.46618700 |
| H | -9.38909800  | 7.95493600  | -6.07055400 |
| H | -7.80181500  | 8.38888100  | -5.40553700 |
| C | -10.86058600 | 8.44324300  | -3.77384800 |
| H | -9.27974600  | 6.99252900  | -3.84615900 |
| H | -10.98884800 | 9.53264400  | -3.80322300 |
| H | -11.28642500 | 8.07907500  | -2.83408800 |
| H | -11.44352100 | 8.01374400  | -4.59649600 |
| C | -8.07584400  | 7.94121800  | 0.99286200  |
| C | -6.66458300  | 7.81383300  | 1.56602400  |
| H | -6.03366600  | 7.19792600  | 0.91553200  |
| H | -6.69709600  | 7.34626700  | 2.55629700  |
| H | -6.18341500  | 8.79128600  | 1.68355000  |
| C | -8.98741500  | 8.70244500  | 1.95691300  |
| H | -8.46866900  | 6.91999500  | 0.87644700  |
| H | -8.62554000  | 9.72884300  | 2.09882800  |
| H | -9.01377100  | 8.21729100  | 2.93897300  |
| H | -10.01340500 | 8.76240400  | 1.57669100  |
| H | -1.22756700  | 7.50847700  | -7.01160500 |
| H | -1.60792800  | 4.84678300  | -6.33521900 |
| H | -11.46515700 | 4.90001500  | 0.22271300  |

|   |              |            |             |
|---|--------------|------------|-------------|
| H | -11.16418700 | 7.56877700 | -0.47746700 |
| C | -4.09462700  | 4.37129200 | -5.29325600 |
| C | -4.79912500  | 3.81237500 | -6.37155800 |
| C | -4.03367700  | 3.75945900 | -4.03465100 |
| C | -5.36642300  | 2.54988200 | -6.18340000 |
| C | -4.67440300  | 2.53205100 | -3.87737700 |
| C | -5.30363000  | 1.91779100 | -4.95241900 |
| H | -5.90996100  | 2.08135200 | -6.99822700 |
| H | -4.67590100  | 2.04755000 | -2.90596000 |
| H | -5.78080400  | 0.95071900 | -4.81678900 |
| C | -3.26595600  | 4.40915200 | -2.90246200 |
| C | -3.74264100  | 3.97285000 | -1.52161300 |
| H | -4.82817600  | 4.06512500 | -1.41207700 |
| H | -3.26498100  | 4.58988400 | -0.75294900 |
| H | -3.46177100  | 2.93210000 | -1.31512400 |
| C | -1.76967400  | 4.10820800 | -3.04289200 |
| H | -3.41334800  | 5.49441300 | -2.99325900 |
| H | -1.59747500  | 3.02546700 | -2.99437500 |
| H | -1.20457500  | 4.57465000 | -2.22799100 |
| H | -1.35789300  | 4.47328500 | -3.98812700 |
| C | -5.07228700  | 4.60033500 | -7.64405900 |
| C | -3.99518600  | 4.44643600 | -8.72175600 |
| H | -4.24614500  | 5.07622400 | -9.58755200 |
| H | -3.94789000  | 3.40652900 | -9.06945200 |
| H | -3.00013900  | 4.73785300 | -8.37704800 |
| C | -6.42591100  | 4.24397700 | -8.26190400 |
| H | -5.11716100  | 5.65941600 | -7.34421900 |
| H | -6.68556900  | 4.97428000 | -9.03555700 |
| H | -7.22985900  | 4.23001700 | -7.51961300 |
| H | -6.39539100  | 3.26242100 | -8.75083900 |
| H | -7.05670800  | 4.07386600 | -1.78615900 |
| H | -5.63140700  | 8.44276100 | -5.02038000 |

**65. NHC\_Full\_CH<sub>3</sub>\_H** (planar)-singlet:

|   |              |            |             |
|---|--------------|------------|-------------|
| N | -9.77787200  | 4.63661500 | -1.15285900 |
| C | -10.82504500 | 6.55498900 | -1.04517800 |
| C | -10.91139700 | 5.26089500 | -0.68456300 |
| C | -8.96725300  | 5.50698500 | -1.85356100 |
| C | -6.53297300  | 6.04896000 | -2.93588400 |
| C | -5.18015800  | 5.64108000 | -3.18760500 |
| C | -7.06447500  | 7.13484100 | -3.85886100 |
| H | -8.15132200  | 7.06560800 | -3.96080200 |
| H | -6.64741600  | 7.01359900 | -4.86827000 |
| H | -6.81635300  | 8.16164700 | -3.54048700 |
| C | -4.64866900  | 4.55521000 | -2.26460500 |
| H | -4.89677700  | 3.52839700 | -2.58296700 |
| H | -5.06575400  | 4.67646400 | -1.25520700 |
| H | -3.56182500  | 4.62445400 | -2.16263700 |
| N | -2.07381200  | 4.97682200 | -4.38171100 |

|   |              |             |             |
|---|--------------|-------------|-------------|
| N | -1.93523200  | 7.05339600  | -4.97062200 |
| C | -0.88808900  | 5.13500300  | -5.07829000 |
| C | -0.80171500  | 6.42909300  | -5.43891100 |
| B | -4.21933000  | 6.50467800  | -3.93526100 |
| B | -7.49379300  | 5.18535500  | -2.18822400 |
| C | -2.74586900  | 6.18303800  | -4.26992000 |
| C | -9.45379800  | 3.28774400  | -0.80571100 |
| C | -9.00745300  | 3.04429800  | 0.49654900  |
| C | -9.58710000  | 2.27402700  | -1.76363000 |
| C | -8.73069500  | 1.72201900  | 0.84822000  |
| C | -9.29716600  | 0.97203200  | -1.36517600 |
| C | -8.88169000  | 0.69648100  | -0.06863800 |
| H | -8.36858800  | 1.50442500  | 1.85025400  |
| H | -8.65841400  | -0.32663600 | 0.22059500  |
| H | -9.38628300  | 0.16040300  | -2.08014000 |
| C | -10.05072600 | 2.59746100  | -3.17015900 |
| C | -11.57278400 | 2.77068200  | -3.19967400 |
| H | -11.91322900 | 3.55576700  | -2.51716800 |
| H | -12.06412100 | 1.83397700  | -2.90726100 |
| H | -11.91527800 | 3.02939500  | -4.20787600 |
| C | -9.62876800  | 1.55269100  | -4.19659000 |
| H | -9.58187700  | 3.54983200  | -3.45580000 |
| H | -9.85836400  | 1.90835200  | -5.20572500 |
| H | -10.17083400 | 0.60893400  | -4.05857800 |
| H | -8.55574300  | 1.34380500  | -4.14560100 |
| C | -8.71252200  | 4.15870300  | 1.48370300  |
| C | -9.34672000  | 3.91518700  | 2.85191400  |
| H | -9.16274000  | 4.77188700  | 3.51004800  |
| H | -8.92110400  | 3.03219600  | 3.34284000  |
| H | -10.42946500 | 3.76784300  | 2.77887800  |
| C | -7.19524100  | 4.32451700  | 1.61347100  |
| H | -9.12290600  | 5.10042600  | 1.09660600  |
| H | -6.95319400  | 5.14190500  | 2.30465700  |
| H | -6.73208500  | 4.53793500  | 0.64132800  |



|   |             |             |             |
|---|-------------|-------------|-------------|
| H | -6.74336400 | 3.40555400  | 2.00901000  |
| C | -2.25927300 | 8.40226600  | -5.31781300 |
| C | -2.70566000 | 8.64567300  | -6.62006500 |
| C | -2.41580200 | 10.71800800 | -4.75844200 |
| C | -2.83134300 | 10.99351500 | -6.05496800 |
| C | -2.98240600 | 9.96794400  | -6.97177600 |
| H | -3.05461000 | 12.01662600 | -6.34423100 |
| H | -3.34455200 | 10.18550500 | -7.97380400 |
| C | -3.00061800 | 7.53124500  | -7.60718400 |
| C | -4.51790100 | 7.36544700  | -7.73695400 |
| H | -4.98106100 | 7.15204100  | -6.76481000 |
| H | -4.75995400 | 6.54805500  | -8.42813200 |
| H | -4.96976700 | 8.28441100  | -8.13250200 |
| C | -2.36641000 | 7.77471900  | -8.97539800 |
| H | -2.59024700 | 6.58952700  | -7.22006100 |
| H | -2.55041300 | 6.91801500  | -9.63352100 |
| H | -1.28366100 | 7.92203200  | -8.90236100 |
| H | -2.79199600 | 8.65771700  | -9.46633800 |
| C | -2.12588400 | 9.41602200  | -4.35994600 |
| C | -1.66218200 | 9.09264500  | -2.95342800 |
| C | -2.08402100 | 10.13749400 | -1.92702900 |
| H | -1.85439800 | 9.78187000  | -0.91788700 |
| H | -3.15703500 | 10.34645100 | -1.97797400 |
| H | -1.54190100 | 11.08120900 | -2.06511700 |
| C | -0.14012900 | 8.91936000  | -2.92399700 |
| H | -2.13105400 | 8.14031100  | -2.66770400 |
| H | 0.20024300  | 8.13421300  | -3.60646700 |
| H | 0.20241400  | 8.66070200  | -1.91579800 |
| H | 0.35122900  | 9.85602400  | -3.21650300 |
| H | -2.32662100 | 11.52966500 | -4.04351800 |
| N | -9.63932700 | 6.71319200  | -1.74176100 |
| C | -9.08675700 | 8.03371900  | -1.84768000 |
| C | -8.12635500 | 8.44250800  | -0.91282300 |
| C | -9.58990700 | 8.89395600  | -2.83052100 |

|   |              |             |             |
|---|--------------|-------------|-------------|
| C | -7.67246100  | 9.75929600  | -0.99468800 |
| C | -8.16635100  | 10.63637200 | -1.94780900 |
| C | -9.12001500  | 10.20482300 | -2.85627000 |
| H | -6.93303600  | 10.10489700 | -0.27690900 |
| H | -7.80458200  | 11.66000200 | -1.98344500 |
| H | -9.50043900  | 10.89033000 | -3.60954200 |
| C | -10.58635400 | 8.42921500  | -3.87452300 |
| C | -10.14801700 | 8.82285500  | -5.28691500 |
| H | -10.21430500 | 9.90704700  | -5.43516000 |
| H | -10.80158000 | 8.35567300  | -6.03133100 |
| H | -9.11736700  | 8.51652800  | -5.49037100 |
| C | -11.97763000 | 8.99752400  | -3.58625600 |
| H | -10.63587000 | 7.33300400  | -3.82861100 |
| H | -11.94594200 | 10.09473700 | -3.60008600 |
| H | -12.35492400 | 8.69146200  | -2.60491500 |
| H | -12.69989900 | 8.67321400  | -4.34369900 |
| C | -7.62614200  | 7.55521300  | 0.21063000  |
| C | -6.10321600  | 7.58138200  | 0.32886400  |
| H | -5.63369200  | 7.31216200  | -0.62575300 |
| H | -5.77313200  | 6.86363000  | 1.08843500  |
| H | -5.73326400  | 8.56708400  | 0.63617500  |
| C | -8.30752800  | 7.94463600  | 1.52435200  |
| H | -7.90363200  | 6.52196800  | -0.01341500 |
| H | -8.06016600  | 8.97532300  | 1.81071300  |
| H | -7.98517800  | 7.28168000  | 2.33843900  |
| H | -9.39984600  | 7.87169300  | 1.44048400  |
| H | -0.04773600  | 6.97728100  | -5.98135100 |
| H | -0.23830500  | 4.29435600  | -5.26095000 |
| H | -11.66536800 | 4.71268800  | -0.14213000 |
| H | -11.47484300 | 7.39562400  | -0.86251300 |
| C | -2.62639700  | 3.65630100  | -4.27579400 |
| C | -3.58681300  | 3.24752500  | -5.21064200 |
| C | -2.12324600  | 2.79605400  | -3.29296200 |
| C | -4.04071500  | 1.93074000  | -5.12878200 |

|   |             |            |             |
|---|-------------|------------|-------------|
| C | -2.59315100 | 1.48519200 | -3.26721400 |
| C | -3.54682600 | 1.05365500 | -4.17566900 |
| H | -4.78014600 | 1.58514800 | -5.84656000 |
| H | -2.21272600 | 0.79967800 | -2.51394800 |
| H | -3.90860200 | 0.03002700 | -4.14003600 |
| C | -1.12678600 | 3.26077800 | -2.24896500 |
| C | -1.56512800 | 2.86715300 | -0.83657100 |
| H | -2.59576900 | 3.17350600 | -0.63311300 |
| H | -0.91155100 | 3.33432100 | -0.09215800 |
| H | -1.49886700 | 1.78296000 | -0.68832400 |
| C | 0.26447700  | 2.69243800 | -2.53723300 |
| H | -1.07724600 | 4.35698900 | -2.29488200 |
| H | 0.23276700  | 1.59522600 | -2.52339500 |
| H | 0.98675600  | 3.01673800 | -1.77979400 |
| H | 0.64177500  | 2.99848500 | -3.51857700 |
| C | -4.08701800 | 4.13482000 | -6.33409800 |
| C | -3.40564800 | 3.74536700 | -7.64781800 |
| H | -3.72799500 | 4.40831500 | -8.46191300 |
| H | -3.65303000 | 2.71467900 | -7.93415900 |
| H | -2.31332800 | 3.81829200 | -7.56396000 |
| C | -5.60994600 | 4.10868400 | -6.45232600 |
| H | -3.80950700 | 5.16806000 | -6.11006100 |
| H | -5.94001700 | 4.82646200 | -7.21188000 |
| H | -6.07946100 | 4.37788900 | -5.49770200 |
| H | -5.97992100 | 3.12299800 | -6.75966100 |
| H | -4.52600200 | 7.56741300 | -4.39859400 |
| H | -7.18711500 | 4.12261500 | -1.72490500 |

**66. NHC\_Full\_CH<sub>3</sub>\_H (planar)-triplet:**

|   |              |            |             |
|---|--------------|------------|-------------|
| N | -9.82483100  | 4.60050600 | -1.18889600 |
| C | -10.83680000 | 6.54037100 | -1.03387700 |
| C | -10.94479400 | 5.23744600 | -0.70843400 |
| C | -8.98664600  | 5.48414800 | -1.85942800 |
| C | -6.50283500  | 6.06380900 | -2.94342800 |
| C | -5.21026200  | 5.62626100 | -3.18013600 |
| C | -7.04408500  | 7.12221100 | -3.89799300 |
| H | -8.12277200  | 6.99168600 | -4.05094100 |
| H | -6.57097700  | 7.03586400 | -4.88536300 |
| H | -6.88306100  | 8.15721200 | -3.55667100 |
| C | -4.66901800  | 4.56789700 | -2.22551700 |
| H | -4.82998400  | 3.53287700 | -2.56680900 |
| H | -5.14217000  | 4.65425800 | -1.23816800 |
| H | -3.59034300  | 4.69846500 | -2.07252700 |
| N | -2.06643200  | 4.98734200 | -4.40438800 |
| N | -1.88828100  | 7.08959700 | -4.93467500 |
| C | -0.87622200  | 5.14977000 | -5.08959900 |
| C | -0.76828300  | 6.45268800 | -5.41509500 |
| B | -4.18298600  | 6.52554100 | -3.92057700 |
| B | -7.53010600  | 5.16453000 | -2.20298600 |

|   |              |             |             |
|---|--------------|-------------|-------------|
| C | -2.72644700  | 6.20593600  | -4.26414200 |
| C | -9.49476100  | 3.25859500  | -0.83069000 |
| C | -9.01983300  | 3.02753000  | 0.46349300  |
| C | -9.64862500  | 2.23418100  | -1.77391700 |
| C | -8.74188100  | 1.70804900  | 0.82563700  |
| C | -9.35501600  | 0.93539300  | -1.36821200 |
| C | -8.91531900  | 0.67287100  | -0.07643700 |
| H | -8.36250100  | 1.50013500  | 1.82363500  |
| H | -8.69130900  | -0.34798400 | 0.22027900  |
| H | -9.46127600  | 0.11621300  | -2.07242100 |
| C | -10.13848800 | 2.54911200  | -3.17297900 |
| C | -11.66225000 | 2.70754900  | -3.17771700 |
| H | -11.99693800 | 3.49204500  | -2.49175400 |
| H | -12.13976500 | 1.76731300  | -2.87390500 |
| H | -12.02444800 | 2.95990000  | -4.18068800 |
| C | -9.72238200  | 1.50583100  | -4.20335300 |
| H | -9.68521300  | 3.50764100  | -3.46512900 |
| H | -9.96999500  | 1.85580200  | -5.21030900 |
| H | -10.25365300 | 0.55758300  | -4.05470400 |
| H | -8.64702100  | 1.30565200  | -4.16713600 |
| C | -8.70722100  | 4.15361800  | 1.43081100  |
| C | -9.35056400  | 3.94562600  | 2.80052600  |
| H | -9.14574500  | 4.80565900  | 3.44839900  |
| H | -8.95076800  | 3.05694900  | 3.30307300  |
| H | -10.43666100 | 3.82694600  | 2.72525300  |
| C | -7.18841900  | 4.29683400  | 1.56243000  |
| H | -9.10003200  | 5.09457000  | 1.02380300  |
| H | -6.93450400  | 5.12057200  | 2.24170500  |
| H | -6.72217100  | 4.49042200  | 0.58688500  |
| H | -6.74883400  | 3.37753200  | 1.97048800  |
| C | -2.21852300  | 8.43140600  | -5.29311300 |
| C | -2.69357500  | 8.66216200  | -6.58730300 |
| C | -2.35852400  | 10.75468600 | -4.75601500 |
| C | -2.79831500  | 11.01691100 | -6.04782000 |

|   |             |             |             |
|---|-------------|-------------|-------------|
| C | -2.97169300 | 9.98154200  | -6.94968700 |
| H | -3.02245800 | 12.03768400 | -6.34471700 |
| H | -3.35115400 | 10.18922200 | -7.94770300 |
| C | -3.00611700 | 7.53584700  | -7.55437700 |
| C | -4.52490600 | 7.39254600  | -7.68604700 |
| H | -4.99119200 | 7.19910800  | -6.71049100 |
| H | -4.77875100 | 6.56867300  | -8.36518400 |
| H | -4.96451900 | 8.31175000  | -8.09429500 |
| C | -2.36270000 | 7.74354800  | -8.92410100 |
| H | -2.61330000 | 6.59500200  | -7.14712900 |
| H | -2.56748400 | 6.88338000  | -9.57180600 |
| H | -1.27660700 | 7.86224100  | -8.84878900 |
| H | -2.76246500 | 8.63212600  | -9.42685000 |
| C | -2.06474100 | 9.45600800  | -4.35008300 |
| C | -1.57481900 | 9.14136100  | -2.95097700 |
| C | -1.99093200 | 10.18481900 | -1.92078600 |
| H | -1.74328300 | 9.83504300  | -0.91377200 |
| H | -3.06630000 | 10.38496100 | -1.95701400 |
| H | -1.45969200 | 11.13305400 | -2.06962700 |
| C | -0.05105100 | 8.98298500  | -2.94624800 |
| H | -2.02805200 | 8.18286500  | -2.65864400 |
| H | 0.28365400  | 8.19837800  | -3.63207400 |
| H | 0.31118100  | 8.73083100  | -1.94323900 |
| H | 0.42641900  | 9.92318500  | -3.25024100 |
| H | -2.25233800 | 11.57401100 | -4.05196300 |
| N | -9.64660200 | 6.70276900  | -1.71912000 |
| C | -9.07933100 | 8.00932200  | -1.85004800 |
| C | -8.08073400 | 8.41478700  | -0.95239000 |
| C | -9.58447000 | 8.86047100  | -2.84134600 |
| C | -7.58975600 | 9.71392900  | -1.08008300 |
| C | -8.08544900 | 10.58047700 | -2.04255800 |
| C | -9.07868000 | 10.15621800 | -2.91181600 |
| H | -6.81846100 | 10.05572500 | -0.39528900 |
| H | -7.69378100 | 11.59104400 | -2.11621400 |

|   |              |             |             |
|---|--------------|-------------|-------------|
| H | -9.45842500  | 10.83453600 | -3.67189500 |
| C | -10.61833300 | 8.39777200  | -3.84930800 |
| C | -10.21810100 | 8.76515700  | -5.28001300 |
| H | -10.28021100 | 9.84726000  | -5.44470400 |
| H | -10.89684500 | 8.29157100  | -5.99731300 |
| H | -9.19632900  | 8.44750200  | -5.50935200 |
| C | -11.99131300 | 8.99365700  | -3.52958100 |
| H | -10.68357500 | 7.30321300  | -3.78578500 |
| H | -11.94090500 | 10.08987100 | -3.56076400 |
| H | -12.34566100 | 8.70849500  | -2.53373700 |
| H | -12.74028800 | 8.67126700  | -4.26149100 |
| C | -7.58980200  | 7.53455200  | 0.18058700  |
| C | -6.07162400  | 7.57456800  | 0.33903400  |
| H | -5.57592500  | 7.31770400  | -0.60552400 |
| H | -5.75507800  | 6.85169200  | 1.09927700  |
| H | -5.71426300  | 8.55871900  | 0.66526600  |
| C | -8.31004100  | 7.90928500  | 1.47771600  |
| H | -7.84998700  | 6.49876700  | -0.05324900 |
| H | -8.08453800  | 8.94268700  | 1.77249300  |
| H | -8.00003300  | 7.24765600  | 2.29800900  |
| H | -9.39863300  | 7.82068100  | 1.36505000  |
| H | -0.00147400  | 6.99759900  | -5.94300600 |
| H | -0.23259400  | 4.30797400  | -5.28853300 |
| H | -11.71162600 | 4.69254400  | -0.18054600 |
| H | -11.48037600 | 7.38219100  | -0.83487800 |
| C | -2.63356300  | 3.68075700  | -4.27321600 |
| C | -3.63220200  | 3.27504700  | -5.17071500 |
| C | -2.12827300  | 2.82982800  | -3.28180300 |
| C | -4.12305700  | 1.97588500  | -5.04275400 |
| C | -2.63394300  | 1.53404900  | -3.21106400 |
| C | -3.62720600  | 1.10955000  | -4.08016700 |
| H | -4.89438900  | 1.63390600  | -5.72741400 |
| H | -2.25407800  | 0.85589800  | -2.45089600 |
| H | -4.01878200  | 0.09896300  | -4.00629900 |

|   |             |            |             |
|---|-------------|------------|-------------|
| C | -1.09437800 | 3.29279400 | -2.27399500 |
| C | -1.49450200 | 2.92567100 | -0.84319300 |
| H | -2.51626900 | 3.24333600 | -0.61384600 |
| H | -0.81572600 | 3.39942100 | -0.12603100 |
| H | -1.43234400 | 1.84360300 | -0.67829600 |
| C | 0.27861800  | 2.69692600 | -2.59368500 |
| H | -1.02920300 | 4.38734400 | -2.33773700 |
| H | 0.22828000  | 1.60071600 | -2.56227200 |
| H | 1.02762000  | 3.01951400 | -1.86189100 |
| H | 0.63288500  | 2.98190200 | -3.58961200 |
| C | -4.12329600 | 4.15506700 | -6.30378600 |
| C | -3.40295500 | 3.78033100 | -7.60085900 |
| H | -3.71306900 | 4.44179900 | -8.42124000 |
| H | -3.62824800 | 2.74685000 | -7.89551600 |
| H | -2.31438200 | 3.86915900 | -7.48817900 |
| C | -5.64146200 | 4.11475400 | -6.46225900 |
| H | -3.86332400 | 5.19092600 | -6.07004200 |
| H | -5.95812200 | 4.83753800 | -7.22254400 |
| H | -6.13722900 | 4.37158400 | -5.51772500 |
| H | -5.99863900 | 3.13052300 | -6.78844900 |
| H | -4.45771600 | 7.66089400 | -4.18857900 |
| H | -7.25537800 | 4.02917600 | -1.93498300 |



**67. NHC\_Full\_H\_H (fully optimized)-singlet:**

|   |              |             |             |
|---|--------------|-------------|-------------|
| N | -9.82517100  | 4.91108100  | -1.37379800 |
| C | -10.32312400 | 7.01981500  | -1.02580100 |
| C | -10.85123700 | 5.77966200  | -1.05535100 |
| C | -8.63857800  | 5.58630900  | -1.53986200 |
| C | -6.10998500  | 5.78338900  | -2.27789700 |
| C | -4.90785900  | 5.37814400  | -2.89938300 |
| N | -2.06923600  | 5.07667100  | -4.73024800 |
| N | -2.35212300  | 7.15211900  | -5.28386900 |
| C | -1.13117700  | 5.37630900  | -5.70239700 |
| C | -1.31508000  | 6.66557800  | -6.05480400 |
| B | -4.01294100  | 6.40327800  | -3.48545600 |
| B | -7.28896800  | 4.95339500  | -1.93432300 |
| C | -2.84088800  | 6.17386200  | -4.44650500 |
| C | -9.99618500  | 3.49194800  | -1.42585800 |
| C | -10.13473300 | 2.79964300  | -0.21663500 |
| C | -10.03789400 | 2.85728500  | -2.67330300 |
| C | -10.35168600 | 1.42314000  | -0.28287200 |
| C | -10.24454300 | 1.47950800  | -2.68663700 |
| C | -10.40850600 | 0.77163100  | -1.50464400 |
| H | -10.46471700 | 0.85353700  | 0.63440800  |
| H | -10.57396700 | -0.30170800 | -1.53691700 |
| H | -10.27656100 | 0.95225300  | -3.63488300 |
| C | -9.90488200  | 3.65401500  | -3.95568700 |
| C | -11.25602800 | 4.27224800  | -4.32737300 |
| H | -11.63953600 | 4.92385400  | -3.53490900 |

|   |              |             |             |
|---|--------------|-------------|-------------|
| H | -11.99841800 | 3.48334100  | -4.50383200 |
| H | -11.17314200 | 4.86818800  | -5.24316000 |
| C | -9.36409800  | 2.82651800  | -5.11593600 |
| H | -9.18605400  | 4.46505100  | -3.77143400 |
| H | -9.12532600  | 3.47929700  | -5.96164200 |
| H | -10.09964100 | 2.09479100  | -5.47277200 |
| H | -8.45255500  | 2.28856600  | -4.83412400 |
| C | -9.94277400  | 3.49574700  | 1.11756800  |
| C | -10.71670400 | 2.84300400  | 2.25920900  |
| H | -10.66410900 | 3.47015100  | 3.15466600  |
| H | -10.28930000 | 1.87023000  | 2.52901700  |
| H | -11.77227300 | 2.69076400  | 2.00996800  |
| C | -8.44697100  | 3.53478600  | 1.44843800  |
| H | -10.29269300 | 4.53396800  | 1.02756700  |
| H | -8.27722400  | 4.05838600  | 2.39718200  |
| H | -7.86399600  | 4.03372000  | 0.66382700  |
| H | -8.06006600  | 2.51282400  | 1.55026900  |
| C | -3.15006800  | 8.27855800  | -5.66779300 |
| C | -4.05477100  | 8.10266800  | -6.71979500 |
| C | -3.82677000  | 10.54734600 | -5.37011300 |
| C | -4.67615900  | 10.42590200 | -6.46341800 |
| C | -4.80107700  | 9.21247300  | -7.12021000 |
| H | -5.26866500  | 11.27856400 | -6.78420600 |
| H | -5.50917900  | 9.10839400  | -7.94015100 |
| C | -4.30801800  | 6.75147000  | -7.36253600 |
| C | -5.72695600  | 6.28281200  | -7.02718600 |
| H | -5.88672200  | 6.23523500  | -5.94011800 |
| H | -5.91072500  | 5.28696200  | -7.45048100 |
| H | -6.47181800  | 6.96670000  | -7.45486300 |
| C | -4.08487400  | 6.77987500  | -8.87306100 |
| H | -3.60930700  | 6.01675000  | -6.94200900 |
| H | -4.24453900  | 5.78243400  | -9.29951300 |
| H | -3.06761400  | 7.09915200  | -9.12427700 |
| H | -4.78340700  | 7.46573100  | -9.36769100 |

|   |              |             |             |
|---|--------------|-------------|-------------|
| C | -3.04761800  | 9.47164800  | -4.94874500 |
| C | -2.11742900  | 9.57068500  | -3.75909400 |
| C | -2.68888900  | 10.44773400 | -2.65110500 |
| H | -2.06562000  | 10.37898400 | -1.75379700 |
| H | -3.70311800  | 10.12262400 | -2.38855200 |
| H | -2.72332900  | 11.50532600 | -2.93963400 |
| C | -0.74214400  | 10.06217600 | -4.21355200 |
| H | -2.00701000  | 8.55864900  | -3.34788400 |
| H | -0.31143900  | 9.39366000  | -4.96869000 |
| H | -0.04352000  | 10.11845700 | -3.37141000 |
| H | -0.81973600  | 11.06247400 | -4.65854900 |
| H | -3.76738100  | 11.49281400 | -4.83825500 |
| N | -8.98676800  | 6.90214300  | -1.34474900 |
| C | -8.05407800  | 7.97219700  | -1.17153500 |
| C | -7.51082200  | 8.16001300  | 0.10021400  |
| C | -7.66144500  | 8.72253900  | -2.28756800 |
| C | -6.59108100  | 9.19920900  | 0.25810500  |
| C | -6.20796700  | 9.97863700  | -0.81955500 |
| C | -6.72405800  | 9.73226800  | -2.08672100 |
| H | -6.15193700  | 9.37538900  | 1.23748100  |
| H | -5.47789200  | 10.77177300 | -0.68043300 |
| H | -6.36058400  | 10.30949600 | -2.93393600 |
| C | -8.17952700  | 8.37147600  | -3.66760300 |
| C | -7.19068600  | 8.73923700  | -4.76750600 |
| H | -7.10948100  | 9.82680300  | -4.89321600 |
| H | -7.52621700  | 8.33429900  | -5.72883600 |
| H | -6.18527400  | 8.34389400  | -4.56068000 |
| C | -9.53526600  | 9.03531300  | -3.92017000 |
| H | -8.30842700  | 7.27806900  | -3.69013200 |
| H | -9.43531500  | 10.12748400 | -3.88083900 |
| H | -10.28196200 | 8.73987700  | -3.17536800 |
| H | -9.92282000  | 8.76842200  | -4.90982600 |
| C | -7.81580400  | 7.24800900  | 1.27419500  |
| C | -6.53418800  | 6.53326100  | 1.70943300  |

|   |              |            |             |
|---|--------------|------------|-------------|
| H | -6.11032600  | 5.95587000 | 0.87900200  |
| H | -6.73288700  | 5.85418000 | 2.54592300  |
| H | -5.77923000  | 7.25621500 | 2.04176700  |
| C | -8.43542300  | 8.02469400 | 2.43548800  |
| H | -8.53650600  | 6.47827400 | 0.95683200  |
| H | -7.74615000  | 8.79262700 | 2.80742300  |
| H | -8.66248200  | 7.35396300 | 3.27151300  |
| H | -9.36279600  | 8.52610700 | 2.13768500  |
| H | -0.82341900  | 7.28317700 | -6.78934800 |
| H | -0.42012800  | 4.63570300 | -6.03278800 |
| H | -11.85442100 | 5.42086800 | -0.88982300 |
| H | -10.76180800 | 7.98148700 | -0.81291800 |
| C | -2.20457600  | 3.77839100 | -4.14228600 |
| C | -3.24776700  | 2.94982400 | -4.57906100 |
| C | -1.27478800  | 3.38157300 | -3.17356100 |
| C | -3.33780100  | 1.67885000 | -4.01625000 |
| C | -1.40202800  | 2.09604900 | -2.64729200 |
| C | -2.42050200  | 1.25451800 | -3.06596500 |
| H | -4.14161100  | 1.01587600 | -4.32048900 |
| H | -0.70084300  | 1.75483800 | -1.89208200 |
| H | -2.50752500  | 0.25929300 | -2.63904600 |
| C | -0.23285700  | 4.34704100 | -2.64290400 |
| C | -0.85930100  | 5.19494400 | -1.53033000 |
| H | -1.75788300  | 5.72062200 | -1.87267900 |
| H | -0.14095800  | 5.93113000 | -1.15155700 |
| H | -1.15582600  | 4.54802300 | -0.69507600 |
| C | 1.02867700   | 3.65682000 | -2.13276000 |
| H | 0.06109100   | 5.02155600 | -3.45885500 |
| H | 0.83704200   | 3.10724700 | -1.20385700 |
| H | 1.79759800   | 4.40191900 | -1.90572700 |
| H | 1.44048900   | 2.95230500 | -2.86333500 |
| C | -4.23280600  | 3.42317300 | -5.63075600 |
| C | -3.66756100  | 3.18918100 | -7.03451200 |
| H | -4.35189100  | 3.58148400 | -7.79882800 |

|   |             |            |             |
|---|-------------|------------|-------------|
| H | -3.52996400 | 2.11719700 | -7.22529500 |
| H | -2.69692200 | 3.68215100 | -7.16995400 |
| C | -5.61751800 | 2.80013800 | -5.48722300 |
| H | -4.36709800 | 4.50096200 | -5.48539000 |
| H | -6.31173600 | 3.28610100 | -6.18286600 |
| H | -6.01339000 | 2.93651900 | -4.47255900 |
| H | -5.62090000 | 1.72922200 | -5.72694500 |
| H | -4.27873100 | 7.57127900 | -3.32545000 |
| H | -7.31040000 | 3.75319700 | -2.05048800 |
| H | -6.13553100 | 6.86797200 | -2.15290700 |
| H | -4.77345200 | 4.29617300 | -3.01082300 |

**68. NHC\_Full\_H\_H (fully optimized)-triplet:**

|   |              |             |             |
|---|--------------|-------------|-------------|
| N | -9.55561100  | 4.31858700  | -1.20916600 |
| C | -10.22467000 | 6.23355800  | -0.35190600 |
| C | -10.39492300 | 4.89547900  | -0.27702300 |
| C | -8.82032200  | 5.29130200  | -1.86244300 |
| C | -6.84448300  | 6.16247300  | -3.51217700 |
| C | -5.49297000  | 6.04851800  | -3.41018300 |
| N | -2.54115900  | 5.13500900  | -4.29773600 |
| N | -1.93763300  | 7.16672500  | -4.76322900 |
| C | -1.22225800  | 5.09310900  | -4.70628400 |
| C | -0.85111000  | 6.35617400  | -5.00626700 |
| B | -4.41080100  | 6.97024800  | -3.99537900 |
| B | -7.75241900  | 5.05189000  | -2.90797500 |
| C | -3.01443100  | 6.43539800  | -4.31848200 |
| C | -9.11019900  | 2.96076600  | -1.18508900 |
| C | -8.09578400  | 2.62118500  | -0.28518000 |
| C | -9.61438200  | 2.06208900  | -2.13123000 |
| C | -7.63967300  | 1.30172100  | -0.29090900 |
| C | -9.12714100  | 0.75715400  | -2.10492000 |
| C | -8.15952200  | 0.37672000  | -1.18213600 |
| H | -6.85762500  | 1.00703300  | 0.40650500  |
| H | -7.79472100  | -0.64700900 | -1.17528800 |
| H | -9.49525700  | 0.03055500  | -2.82265100 |
| C | -10.64025300 | 2.52860300  | -3.14429400 |
| C | -12.03659000 | 2.55883300  | -2.51659400 |
| H | -12.07564400 | 3.21138800  | -1.63880200 |
| H | -12.33172300 | 1.55035500  | -2.20051400 |
| H | -12.78076600 | 2.91747600  | -3.23641400 |
| C | -10.65480600 | 1.68424600  | -4.41257300 |
| H | -10.36145200 | 3.55623600  | -3.42637800 |
| H | -11.30251200 | 2.14659300  | -5.16379400 |

|   |              |             |             |
|---|--------------|-------------|-------------|
| H | -11.05040500 | 0.67861000  | -4.22374300 |
| H | -9.65317800  | 1.58271800  | -4.84260800 |
| C | -7.44890900  | 3.63858900  | 0.63390500  |
| C | -7.61587400  | 3.26508500  | 2.10566500  |
| H | -7.15970700  | 4.02855300  | 2.74698600  |
| H | -7.12770500  | 2.30864900  | 2.33045700  |
| H | -8.67201600  | 3.17467100  | 2.38149000  |
| C | -5.97050600  | 3.80240800  | 0.27426700  |
| H | -7.93193800  | 4.61270400  | 0.48125200  |
| H | -5.51800500  | 4.60514400  | 0.87334600  |
| H | -5.84970600  | 4.04629400  | -0.79128600 |
| H | -5.40620000  | 2.87997800  | 0.47464200  |
| C | -2.06512400  | 8.50655900  | -5.22882900 |
| C | -2.41526100  | 8.69212200  | -6.57139500 |
| C | -2.01618700  | 10.85871400 | -4.84117300 |
| C | -2.30870500  | 11.07601400 | -6.17952500 |
| C | -2.51966800  | 10.00274400 | -7.03387800 |
| H | -2.39441900  | 12.09148100 | -6.55624600 |
| H | -2.79032500  | 10.18085200 | -8.07257000 |
| C | -2.76013700  | 7.52813300  | -7.48256300 |
| C | -4.25423000  | 7.56104300  | -7.81682000 |
| H | -4.86491900  | 7.56604700  | -6.90545100 |
| H | -4.53176100  | 6.68445600  | -8.41699600 |
| H | -4.50308500  | 8.45797700  | -8.39867400 |
| C | -1.92004900  | 7.52184700  | -8.75791500 |
| H | -2.56238600  | 6.58752400  | -6.94998700 |
| H | -2.17143500  | 6.65063500  | -9.37393300 |
| H | -0.84800300  | 7.48538900  | -8.53743900 |
| H | -2.10738800  | 8.41711700  | -9.36325200 |
| C | -1.89948800  | 9.56445200  | -4.33386900 |
| C | -1.66401600  | 9.33979300  | -2.85369200 |
| C | -2.84417000  | 9.89387700  | -2.05080600 |
| H | -2.73304100  | 9.65909200  | -0.98545800 |
| H | -3.78809600  | 9.46392500  | -2.40528900 |

|   |              |             |             |
|---|--------------|-------------|-------------|
| H | -2.90451600  | 10.98574400 | -2.14949300 |
| C | -0.35146500  | 9.97080400  | -2.39058600 |
| H | -1.61834200  | 8.25726600  | -2.67362100 |
| H | 0.50774100   | 9.57603100  | -2.94225300 |
| H | -0.18767200  | 9.78523800  | -1.32356100 |
| H | -0.36874400  | 11.05808200 | -2.53589100 |
| H | -1.88920600  | 11.70554600 | -4.17002600 |
| N | -9.25253700  | 6.47653000  | -1.30289300 |
| C | -8.72076200  | 7.75537700  | -1.66232200 |
| C | -7.43854900  | 8.11284100  | -1.20673100 |
| C | -9.45996800  | 8.55422600  | -2.54206900 |
| C | -6.90113500  | 9.30562100  | -1.68580400 |
| C | -7.61374300  | 10.11217700 | -2.56207000 |
| C | -8.88381800  | 9.74743200  | -2.97794300 |
| H | -5.90413900  | 9.60543000  | -1.38072400 |
| H | -7.16767500  | 11.03204000 | -2.92939700 |
| H | -9.42662100  | 10.38317300 | -3.67087800 |
| C | -10.78106900 | 8.07924500  | -3.11562100 |
| C | -10.50214100 | 7.24020000  | -4.36756000 |
| H | -9.98476500  | 7.85432300  | -5.11630200 |
| H | -11.43560000 | 6.87556900  | -4.81210700 |
| H | -9.86122300  | 6.37801900  | -4.14567800 |
| C | -11.73942400 | 9.21945300  | -3.44920200 |
| H | -11.27224200 | 7.43409800  | -2.37482200 |
| H | -11.39326200 | 9.79482200  | -4.31557800 |
| H | -11.86311700 | 9.91336700  | -2.61107900 |
| H | -12.72417400 | 8.81850600  | -3.70958300 |
| C | -6.66089900  | 7.21415000  | -0.26359200 |
| C | -5.17556800  | 7.54755500  | -0.18857500 |
| H | -4.70339000  | 7.52783900  | -1.17953800 |
| H | -4.66727400  | 6.81200700  | 0.44596200  |
| H | -5.00171800  | 8.53334700  | 0.26431500  |
| C | -7.25417500  | 7.22783800  | 1.15003600  |
| H | -6.74056800  | 6.19365000  | -0.66732200 |



|   |              |            |             |
|---|--------------|------------|-------------|
| H | -7.13940700  | 8.21967100 | 1.60522500  |
| H | -6.72579000  | 6.50574800 | 1.78852200  |
| H | -8.31727100  | 6.96935100 | 1.16857800  |
| H | 0.07901700   | 6.75859400 | -5.37298900 |
| H | -0.68146400  | 4.16103800 | -4.74822800 |
| H | -11.03209900 | 4.29627800 | 0.35385300  |
| H | -10.70056700 | 7.04164300 | 0.18083600  |
| C | -3.34175300  | 3.98842400 | -3.99545800 |
| C | -4.35464500  | 3.61958200 | -4.89719200 |
| C | -3.17012700  | 3.36572200 | -2.75299000 |
| C | -5.23287800  | 2.61636300 | -4.49538400 |
| C | -4.06799400  | 2.35454200 | -2.40712800 |
| C | -5.10390800  | 2.00177100 | -3.25833900 |
| H | -6.05954000  | 2.33752700 | -5.14001700 |
| H | -3.98197000  | 1.86267800 | -1.44280000 |
| H | -5.82908700  | 1.25222100 | -2.94929100 |
| C | -2.14592100  | 3.87949500 | -1.75635200 |
| C | -2.68286500  | 5.14676000 | -1.08074000 |
| H | -2.87374300  | 5.96175700 | -1.78902400 |
| H | -1.98438500  | 5.50772600 | -0.31596000 |
| H | -3.63729500  | 4.91663100 | -0.58964400 |
| C | -1.78328000  | 2.85518500 | -0.68595400 |
| H | -1.22682400  | 4.14122600 | -2.30026600 |
| H | -2.62046600  | 2.69966700 | 0.00721000  |
| H | -0.94025400  | 3.21746800 | -0.08943000 |
| H | -1.51073500  | 1.88372700 | -1.11193600 |
| C | -4.52151900  | 4.32889400 | -6.22743300 |
| C | -3.46134000  | 3.87734700 | -7.23599400 |
| H | -3.54924100  | 4.45385700 | -8.16757200 |
| H | -3.58464100  | 2.81589800 | -7.48531400 |
| H | -2.44378500  | 4.01789600 | -6.85265800 |
| C | -5.92195900  | 4.18720800 | -6.80990600 |
| H | -4.37174400  | 5.40085900 | -6.04255100 |
| H | -6.02950000  | 4.84732700 | -7.67781300 |

|   |             |            |             |
|---|-------------|------------|-------------|
| H | -6.68333300 | 4.46517500 | -6.07047100 |
| H | -6.12324200 | 3.16486800 | -7.15466400 |
| H | -4.64172500 | 8.10384700 | -4.31981600 |
| H | -7.54078600 | 3.89589900 | -3.16440000 |
| H | -7.23726400 | 7.05345700 | -4.02829100 |
| H | -5.17931900 | 5.15461600 | -2.84828000 |

**69. NHC\_Full\_H\_H (twisted)-singlet:**

|   |             |            |             |
|---|-------------|------------|-------------|
| N | -9.68077500 | 4.66411400 | -0.70004000 |
|---|-------------|------------|-------------|

|   |              |            |             |
|---|--------------|------------|-------------|
| C | -10.82362300 | 6.52895300 | -0.85251100 |
| C | -10.85808600 | 5.27765300 | -0.34142800 |
| C | -8.89084600  | 5.50383300 | -1.44932500 |
| C | -6.64652800  | 6.22040300 | -2.77823000 |
| C | -6.61126200  | 6.31109100 | -4.11902000 |
| N | -3.62117600  | 5.84199400 | -5.15823300 |
| N | -3.48947300  | 7.80942500 | -6.08820700 |
| C | -2.37439900  | 5.94567600 | -5.74039700 |
| C | -2.28182800  | 7.17205500 | -6.29733500 |
| B | -5.76157700  | 7.33947400 | -4.93452200 |
| B | -7.47992900  | 5.20988600 | -1.92799800 |
| C | -4.34905400  | 6.99923900 | -5.36688700 |
| C | -9.18232800  | 3.41170900 | -0.25062000 |
| C | -8.50732500  | 3.38887300 | 0.97405400  |
| C | -9.23762200  | 2.31126000 | -1.11064800 |
| C | -7.94472100  | 2.17939500 | 1.37837300  |
| C | -8.64315300  | 1.12787800 | -0.67271000 |
| C | -8.01559600  | 1.05836800 | 0.56334400  |
| H | -7.41829800  | 2.12760000 | 2.32940100  |
| H | -7.56157600  | 0.12562800 | 0.88662300  |
| H | -8.66319800  | 0.25232700 | -1.31814400 |
| C | -9.86499900  | 2.38794800 | -2.49059400 |
| C | -10.92802800 | 1.30396400 | -2.67679900 |
| H | -11.69305400 | 1.34399100 | -1.89472100 |
| H | -10.47982600 | 0.30333300 | -2.65322100 |
| H | -11.42298200 | 1.41479100 | -3.64743000 |
| C | -8.79550300  | 2.27718900 | -3.58397500 |
| H | -10.34895600 | 3.36864300 | -2.59551200 |
| H | -9.26353900  | 2.27537000 | -4.57622300 |
| H | -8.23040400  | 1.33965700 | -3.47867000 |
| H | -8.07945700  | 3.10878800 | -3.53811300 |
| C | -8.30016600  | 4.64490600 | 1.80087500  |
| C | -8.89866000  | 4.51041900 | 3.19989500  |
| H | -8.74787900  | 5.43184000 | 3.77368400  |

|   |             |             |              |
|---|-------------|-------------|--------------|
| H | -8.42008800 | 3.69384100  | 3.75474200   |
| H | -9.97320900 | 4.30303600  | 3.16314600   |
| C | -6.80809600 | 4.98063800  | 1.87979800   |
| H | -8.79808500 | 5.48557800  | 1.29724200   |
| H | -6.65774100 | 5.95187600  | 2.36988300   |
| H | -6.36224200 | 5.02287600  | 0.87810500   |
| H | -6.26449300 | 4.22547900  | 2.46230100   |
| C | -3.66762600 | 9.22612700  | -6.12536300  |
| C | -4.31834900 | 9.80441600  | -7.22020200  |
| C | -3.43534200 | 11.34880600 | -5.05338300  |
| C | -4.03561600 | 11.95340300 | -6.14608900  |
| C | -4.48282200 | 11.18751000 | -7.21574500  |
| H | -4.17570400 | 13.03082300 | -6.15924800  |
| H | -4.98342400 | 11.67288200 | -8.04798800  |
| C | -4.82381500 | 8.92808800  | -8.34801700  |
| C | -5.99189900 | 9.54658000  | -9.10698100  |
| H | -6.78887600 | 9.87004000  | -8.42976900  |
| H | -6.41339400 | 8.81768500  | -9.80621500  |
| H | -5.67446000 | 10.41264300 | -9.70072900  |
| C | -3.68637200 | 8.59339600  | -9.31679600  |
| H | -5.17709900 | 7.99292800  | -7.88713200  |
| H | -4.03964800 | 7.94318300  | -10.12498600 |
| H | -2.85822700 | 8.08474000  | -8.81363100  |
| H | -3.29278100 | 9.51184500  | -9.77029600  |
| C | -3.24715100 | 9.96647500  | -5.01584500  |
| C | -2.66185100 | 9.31449500  | -3.77730500  |
| C | -3.63527800 | 9.44708800  | -2.60191100  |
| H | -3.24053500 | 8.92244200  | -1.71937400  |
| H | -4.61811600 | 9.01943200  | -2.85270900  |
| H | -3.77864200 | 10.50147800 | -2.32830000  |
| C | -1.29568500 | 9.89590500  | -3.41616700  |
| H | -2.52340200 | 8.24266000  | -3.97194400  |
| H | -0.58479700 | 9.80105000  | -4.24366700  |
| H | -0.87848900 | 9.37507500  | -2.54640600  |

|   |              |             |             |
|---|--------------|-------------|-------------|
| H | -1.36858000  | 10.95905500 | -3.15710200 |
| H | -3.11906400  | 11.95155600 | -4.20449800 |
| N | -9.61914000  | 6.67374500  | -1.51397700 |
| C | -9.10671700  | 7.88350000  | -2.07679300 |
| C | -8.05490400  | 8.54091600  | -1.41847000 |
| C | -9.59998600  | 8.29514900  | -3.32081100 |
| C | -7.47819400  | 9.63114000  | -2.06986000 |
| C | -7.93336700  | 10.04520700 | -3.31225200 |
| C | -8.99167600  | 9.39249200  | -3.92618900 |
| H | -6.64701200  | 10.15540800 | -1.60777800 |
| H | -7.44835800  | 10.87802300 | -3.81362600 |
| H | -9.33071900  | 9.72650700  | -4.90157100 |
| C | -10.68871600 | 7.50534400  | -4.02549400 |
| C | -10.09053300 | 6.27322600  | -4.71422900 |
| H | -9.34932600  | 6.59000200  | -5.45922700 |
| H | -10.87444900 | 5.70366300  | -5.22791500 |
| H | -9.57631800  | 5.60647500  | -4.00976200 |
| C | -11.46835100 | 8.33377700  | -5.04234800 |
| H | -11.40300400 | 7.15367600  | -3.26750100 |
| H | -10.85453700 | 8.56849100  | -5.91976600 |
| H | -11.82808100 | 9.27769300  | -4.61904100 |
| H | -12.33361600 | 7.76793700  | -5.40196000 |
| C | -7.53042500  | 8.05399500  | -0.07813500 |
| C | -6.14436600  | 8.58733100  | 0.26815700  |
| H | -5.43278000  | 8.43587900  | -0.55266400 |
| H | -5.75820000  | 8.05861600  | 1.14820400  |
| H | -6.16380300  | 9.65771100  | 0.51141900  |
| C | -8.50614100  | 8.36557800  | 1.06064900  |
| H | -7.43322200  | 6.95843900  | -0.14343900 |
| H | -8.61538500  | 9.44958000  | 1.19124100  |
| H | -8.13157000  | 7.95014700  | 2.00637300  |
| H | -9.50119600  | 7.94421700  | 0.88382200  |
| H | -1.47169700  | 7.65703200  | -6.81780100 |
| H | -1.67148500  | 5.12870600  | -5.69878700 |

|   |              |            |             |
|---|--------------|------------|-------------|
| H | -11.60922000 | 4.76663900 | 0.23842700  |
| H | -11.53485000 | 7.33784700 | -0.80122000 |
| C | -4.07591500  | 4.70280800 | -4.41573000 |
| C | -4.83472900  | 3.73494300 | -5.07846700 |
| C | -3.85073200  | 4.66592100 | -3.03046700 |
| C | -5.28286600  | 2.64117200 | -4.33657100 |
| C | -4.30387100  | 3.54703400 | -2.33691100 |
| C | -5.00093200  | 2.53768800 | -2.98508500 |
| H | -5.89061500  | 1.87877200 | -4.81582100 |
| H | -4.17761700  | 3.49384900 | -1.26018300 |
| H | -5.38530400  | 1.69526400 | -2.41408300 |
| C | -3.30494000  | 5.88140400 | -2.29993300 |
| C | -3.73327900  | 5.93250100 | -0.83399000 |
| H | -4.81544900  | 5.78651600 | -0.71362100 |
| H | -3.46862900  | 6.90738400 | -0.40629700 |
| H | -3.21654000  | 5.17143800 | -0.23536900 |
| C | -1.78397200  | 6.03130800 | -2.37926600 |
| H | -3.76107200  | 6.75046100 | -2.80046900 |
| H | -1.28440700  | 5.20660800 | -1.85572600 |
| H | -1.47761500  | 6.96903800 | -1.89363600 |
| H | -1.41238300  | 6.05622300 | -3.40745800 |
| C | -5.21670200  | 3.90414600 | -6.53576100 |
| C | -4.13120400  | 3.33609800 | -7.45287400 |
| H | -4.39922300  | 3.46600000 | -8.50758100 |
| H | -4.00477400  | 2.26205600 | -7.26593800 |
| H | -3.16387800  | 3.82165200 | -7.28796100 |
| C | -6.56798100  | 3.27137000 | -6.85994800 |
| H | -5.30690300  | 4.98461100 | -6.72568500 |
| H | -6.90058000  | 3.58130000 | -7.85578600 |
| H | -7.33488400  | 3.56661200 | -6.13293800 |
| H | -6.51116500  | 2.17596200 | -6.86744800 |
| H | -6.01906700  | 6.96280200 | -2.25130400 |
| H | -7.23120900  | 5.57432000 | -4.66319600 |
| H | -6.19321600  | 8.38456200 | -5.34173300 |

H            -7.01712100   4.17298000   -1.53998700

**70. NHC\_Full\_H\_H (twisted)-triplet:**

|   |              |            |             |
|---|--------------|------------|-------------|
| N | -9.67971900  | 4.66582700 | -0.69936600 |
| C | -10.82367400 | 6.52988000 | -0.85270800 |
| C | -10.85786500 | 5.27836300 | -0.34204800 |
| C | -8.88957300  | 5.50620000 | -1.44775000 |
| C | -6.64387900  | 6.22407100 | -2.77486200 |
| C | -6.61184000  | 6.30989700 | -4.11654600 |

|   |              |            |             |
|---|--------------|------------|-------------|
| N | -3.62185000  | 5.84057100 | -5.15707500 |
| N | -3.49010700  | 7.80801700 | -6.08707700 |
| C | -2.37522200  | 5.94408400 | -5.73951600 |
| C | -2.28271300  | 7.17038500 | -6.29666300 |
| B | -5.76198800  | 7.33816900 | -4.93307800 |
| B | -7.47823300  | 5.21283500 | -1.92530200 |
| C | -4.34953600  | 6.99810800 | -5.36515000 |
| C | -9.18149800  | 3.41257400 | -0.25219200 |
| C | -8.50529100  | 3.38755000 | 0.97173200  |
| C | -9.23740100  | 2.31380300 | -1.11435300 |
| C | -7.94141900  | 2.17757500 | 1.37283600  |
| C | -8.64174900  | 1.12986800 | -0.67960700 |
| C | -8.01247700  | 1.05825700 | 0.55549300  |
| H | -7.41383600  | 2.12412100 | 2.32313200  |
| H | -7.55739800  | 0.12515100 | 0.87622700  |
| H | -8.66207200  | 0.25562200 | -1.32679900 |
| C | -9.86651400  | 2.39323300 | -2.49337000 |
| C | -10.92815100 | 1.30816600 | -2.68124100 |
| H | -11.69200200 | 1.34458100 | -1.89784100 |
| H | -10.47836500 | 0.30816500 | -2.66149700 |
| H | -11.42479600 | 1.42122100 | -3.65075000 |
| C | -8.79837600  | 2.28690800 | -3.58852800 |
| H | -10.35213300 | 3.37345800 | -2.59507000 |
| H | -9.26786200  | 2.28661600 | -4.58009900 |
| H | -8.23158400  | 1.35005300 | -3.48615800 |
| H | -8.08334800  | 3.11936800 | -3.54174200 |
| C | -8.29805600  | 4.64195800 | 1.80096600  |
| C | -8.89358800  | 4.50376800 | 3.20088800  |
| H | -8.74280100  | 5.42418900 | 3.77626400  |
| H | -8.41276700  | 3.68673300 | 3.75310000  |
| H | -9.96792000  | 4.29505000 | 3.16597500  |
| C | -6.80614300  | 4.97894600 | 1.87774500  |
| H | -8.79781200  | 5.48318800 | 1.30003400  |
| H | -6.65572100  | 5.94973100 | 2.36873000  |



|   |             |             |              |
|---|-------------|-------------|--------------|
| H | -6.36211100 | 5.02273300  | 0.87530800   |
| H | -6.26095500 | 4.22345500  | 2.45836100   |
| C | -3.66812900 | 9.22468700  | -6.12547600  |
| C | -4.31912600 | 9.80201300  | -7.22065600  |
| C | -3.43566300 | 11.34831400 | -5.05540300  |
| C | -4.03597700 | 11.95197700 | -6.14860900  |
| C | -4.48342100 | 11.18513900 | -7.21748100  |
| H | -4.17600100 | 13.02939200 | -6.16272000  |
| H | -4.98418600 | 11.66978400 | -8.05004900  |
| C | -4.82538000 | 8.92465600  | -8.34733600  |
| C | -5.99335200 | 9.54290900  | -9.10667900  |
| H | -6.78994900 | 9.86767500  | -8.42965000  |
| H | -6.41547200 | 8.81340200  | -9.80489900  |
| H | -5.67557600 | 10.40805600 | -9.70158200  |
| C | -3.68850900 | 8.58820000  | -9.31617700  |
| H | -5.17906000 | 7.99021000  | -7.88524800  |
| H | -4.04251900 | 7.93731800  | -10.12350700 |
| H | -2.86046300 | 8.07959100  | -8.81282400  |
| H | -3.29457900 | 9.50592000  | -9.77085700  |
| C | -3.24748300 | 9.96602200  | -5.01668900  |
| C | -2.66302500 | 9.31491400  | -3.77730700  |
| C | -3.63865500 | 9.44621600  | -2.60354900  |
| H | -3.24448000 | 8.92252600  | -1.72019400  |
| H | -4.62047200 | 9.01700100  | -2.85578300  |
| H | -3.78417600 | 10.50050400 | -2.33060600  |
| C | -1.29834000 | 9.89823800  | -3.41371200  |
| H | -2.52275300 | 8.24325700  | -3.97173800  |
| H | -0.58598800 | 9.80502500  | -4.24012500  |
| H | -0.88172800 | 9.37750700  | -2.54361800  |
| H | -1.37324300 | 10.96108300 | -3.15399700  |
| H | -3.11946500 | 11.95180000 | -4.20702100  |
| N | -9.61847900 | 6.67572900  | -1.51255400  |
| C | -9.10649600 | 7.88549900  | -2.07550500  |
| C | -8.05508100 | 8.54347000  | -1.41708100  |

|   |              |             |             |
|---|--------------|-------------|-------------|
| C | -9.59872900  | 8.29573200  | -3.32038900 |
| C | -7.47780100  | 9.63293500  | -2.06924200 |
| C | -7.93196300  | 10.04558800 | -3.31247700 |
| C | -8.98991300  | 9.39234000  | -3.92652900 |
| H | -6.64677000  | 10.15753200 | -1.60726400 |
| H | -7.44633400  | 10.87765900 | -3.81451300 |
| H | -9.32787600  | 9.72503100  | -4.90273900 |
| C | -10.68589000 | 7.50434000  | -4.02573500 |
| C | -10.08540500 | 6.27254100  | -4.71313700 |
| H | -9.34337500  | 6.58981700  | -5.45712600 |
| H | -10.86799800 | 5.70197400  | -5.22773100 |
| H | -9.57151600  | 5.60654500  | -4.00763900 |
| C | -11.46525600 | 8.33133100  | -5.04397300 |
| H | -11.40062000 | 7.15229800  | -3.26835400 |
| H | -10.85076700 | 8.56600500  | -5.92092500 |
| H | -11.82626900 | 9.27520400  | -4.62166700 |
| H | -12.32964100 | 7.76445900  | -5.40407900 |
| C | -7.53070500  | 8.05679700  | -0.07665600 |
| C | -6.14523300  | 8.59124200  | 0.27015800  |
| H | -5.43313900  | 8.44003700  | -0.55029700 |
| H | -5.75909000  | 8.06301100  | 1.15050200  |
| H | -6.16547200  | 9.66168400  | 0.51308200  |
| C | -8.50697500  | 8.36644300  | 1.06215300  |
| H | -7.43231100  | 6.96132300  | -0.14244500 |
| H | -8.61752700  | 9.45019500  | 1.19370000  |
| H | -8.13203400  | 7.95062300  | 2.00756400  |
| H | -9.50150700  | 7.94403600  | 0.88486500  |
| H | -1.47274800  | 7.65511300  | -6.81761700 |
| H | -1.67233400  | 5.12708800  | -5.69798700 |
| H | -11.60930500 | 4.76674400  | 0.23686800  |
| H | -11.53548000 | 7.33829200  | -0.80190400 |
| C | -4.07647700  | 4.70183200  | -4.41390100 |
| C | -4.83571200  | 3.73383500  | -5.07593100 |
| C | -3.85136300  | 4.66586100  | -3.02859400 |

|   |             |            |             |
|---|-------------|------------|-------------|
| C | -5.28425500 | 2.64072700 | -4.33329800 |
| C | -4.30502600 | 3.54768600 | -2.33424200 |
| C | -5.00234300 | 2.53806700 | -2.98174700 |
| H | -5.89223700 | 1.87822200 | -4.81206600 |
| H | -4.17923100 | 3.49542500 | -1.25740800 |
| H | -5.38723700 | 1.69630400 | -2.41010100 |
| C | -3.30581900 | 5.88203300 | -2.29905600 |
| C | -3.73420500 | 5.93441200 | -0.83322000 |
| H | -4.81646000 | 5.78897800 | -0.71289700 |
| H | -3.46921800 | 6.90952700 | -0.40625200 |
| H | -3.21783500 | 5.17362700 | -0.23392900 |
| C | -1.78489300 | 6.03226700 | -2.37856200 |
| H | -3.76219100 | 6.75052900 | -2.80040100 |
| H | -1.28512800 | 5.20828700 | -1.85407900 |
| H | -1.47881000 | 6.97061900 | -1.89396300 |
| H | -1.41327300 | 6.05611800 | -3.40677700 |
| C | -5.21797800 | 3.90265900 | -6.53320300 |
| C | -4.13259300 | 3.33469800 | -7.45049900 |
| H | -4.40091700 | 3.46442100 | -8.50515100 |
| H | -4.00588200 | 2.26070600 | -7.26348100 |
| H | -3.16533200 | 3.82048900 | -7.28591300 |
| C | -6.56920900 | 3.26967200 | -6.85707700 |
| H | -5.30840800 | 4.98311200 | -6.72322300 |
| H | -6.90178200 | 3.57908400 | -7.85308500 |
| H | -7.33617400 | 3.56528600 | -6.13027800 |
| H | -6.51241100 | 2.17425700 | -6.86398200 |
| H | -6.01969800 | 6.97073500 | -2.25100400 |
| H | -7.22834200 | 5.56825800 | -4.65718700 |
| H | -6.18907300 | 8.38915900 | -5.32928400 |
| H | -7.01987300 | 4.17035700 | -1.54783800 |

**71. NHC\_Full\_H\_H (planar)-singlet:**

|   |             |             |             |
|---|-------------|-------------|-------------|
| N | -8.64551500 | 3.39256100  | -1.01817900 |
| C | -6.79158500 | 2.22558800  | -1.11994900 |
| C | -8.04423800 | 2.21683500  | -0.61807800 |
| C | -7.80019300 | 4.14042000  | -1.80252100 |
| C | -7.14724600 | 6.34725600  | -3.15828200 |
| C | -7.37699800 | 7.65362800  | -3.63999300 |
| N | -7.56806400 | 10.73031000 | -4.80127300 |
| N | -5.67790800 | 10.46958400 | -5.82079200 |
| C | -7.25959700 | 11.93306000 | -5.40798100 |
| C | -6.07764000 | 11.77302500 | -6.03672300 |
| B | -6.39343400 | 8.37656100  | -4.48483800 |

|   |              |             |             |
|---|--------------|-------------|-------------|
| B | -8.08238100  | 5.56709300  | -2.31231000 |
| C | -6.58754800  | 9.79682400  | -5.03752600 |
| C | -10.03794800 | 3.66354700  | -0.86109400 |
| C | -10.88028200 | 3.46672100  | -1.95972400 |
| C | -10.50194700 | 4.10010900  | 0.38741500  |
| C | -12.23609400 | 3.74759700  | -1.78553800 |
| C | -11.86586600 | 4.35306200  | 0.51329300  |
| C | -12.72343700 | 4.18654300  | -0.56622100 |
| H | -12.91589200 | 3.61316200  | -2.62387300 |
| H | -13.78297300 | 4.39698900  | -0.45036300 |
| H | -12.26489400 | 4.69087900  | 1.46438900  |
| C | -9.53478900  | 4.34349800  | 1.53201800  |
| C | -10.20146900 | 4.30077300  | 2.90309000  |
| H | -10.80153000 | 3.39563300  | 3.04583800  |
| H | -10.85520900 | 5.16777300  | 3.05565300  |
| H | -9.44133500  | 4.33439200  | 3.68969000  |
| C | -8.82020200  | 5.68607300  | 1.34180000  |
| H | -8.77257300  | 3.55111100  | 1.50691800  |
| H | -8.11558100  | 5.86453100  | 2.16241300  |
| H | -9.55377500  | 6.50173000  | 1.34098300  |
| H | -8.27425300  | 5.74012600  | 0.39344200  |
| C | -10.39405600 | 2.95448800  | -3.30430400 |
| C | -11.10076300 | 1.64939700  | -3.67615300 |
| H | -10.70448500 | 1.25861600  | -4.62018400 |
| H | -12.17738600 | 1.80719900  | -3.81289300 |
| H | -10.97127300 | 0.88174300  | -2.90604200 |
| C | -10.60652100 | 4.00809100  | -4.39310500 |
| H | -9.31597300  | 2.74409000  | -3.24213700 |
| H | -10.26630400 | 3.62981500  | -5.36382400 |
| H | -10.05763000 | 4.92947500  | -4.16929700 |
| H | -11.67188600 | 4.25420700  | -4.48767500 |
| C | -4.32510000  | 10.03941600 | -5.99988300 |
| C | -3.39830500  | 10.39393900 | -5.01606800 |
| C | -2.65916100  | 8.89631900  | -7.26725100 |

|   |             |             |             |
|---|-------------|-------------|-------------|
| C | -1.70461100 | 9.27867300  | -6.33253900 |
| C | -2.07198800 | 10.00629900 | -5.21280200 |
| H | -0.66775600 | 8.98461000  | -6.47058400 |
| H | -1.32650200 | 10.26415800 | -4.46358300 |
| C | -3.79987600 | 11.09027100 | -3.72885400 |
| C | -3.65335800 | 10.11806000 | -2.55343700 |
| H | -4.25681400 | 9.21298000  | -2.70650500 |
| H | -3.97205200 | 10.59624700 | -1.61793400 |
| H | -2.60525800 | 9.81446700  | -2.43300800 |
| C | -2.99224400 | 12.36323100 | -3.48228200 |
| H | -4.85714900 | 11.38160700 | -3.79320200 |
| H | -3.34120000 | 12.86157900 | -2.57023900 |
| H | -3.08569100 | 13.06976800 | -4.31385600 |
| H | -1.92651500 | 12.14221500 | -3.34787300 |
| C | -3.99425300 | 9.26093400  | -7.11332600 |
| C | -5.07210300 | 8.83468000  | -8.08935500 |
| C | -4.72082900 | 7.55866500  | -8.84529000 |
| H | -5.58652100 | 7.21342600  | -9.41891100 |
| H | -4.42002400 | 6.75539000  | -8.16561500 |
| H | -3.90740900 | 7.72563000  | -9.56224300 |
| C | -5.37624100 | 9.96235800  | -9.07980300 |
| H | -5.97707300 | 8.63449000  | -7.49558800 |
| H | -5.69510100 | 10.87887400 | -8.57371800 |
| H | -6.17085800 | 9.66764000  | -9.77430100 |
| H | -4.48197100 | 10.19711600 | -9.67087700 |
| H | -2.36173300 | 8.29125400  | -8.11811200 |
| N | -6.65132400 | 3.39274100  | -1.83867400 |
| C | -5.45614900 | 3.76981300  | -2.52113600 |
| C | -5.23327800 | 3.23916000  | -3.79713600 |
| C | -4.59796000 | 4.69642900  | -1.92146100 |
| C | -4.09208500 | 3.65947400  | -4.47826600 |
| C | -3.21678000 | 4.56973800  | -3.90362300 |
| C | -3.46462700 | 5.07747900  | -2.63773500 |
| H | -3.89478100 | 3.28121300  | -5.47716800 |

|   |              |             |             |
|---|--------------|-------------|-------------|
| H | -2.33799800  | 4.89439500  | -4.45329500 |
| H | -2.77902100  | 5.79919700  | -2.20118700 |
| C | -4.87183100  | 5.30731100  | -0.56199900 |
| C | -4.73119800  | 6.83191300  | -0.59460900 |
| H | -3.68074800  | 7.13456300  | -0.69618100 |
| H | -5.10398600  | 7.26557100  | 0.34070900  |
| H | -5.30002400  | 7.26642700  | -1.42655900 |
| C | -3.93728600  | 4.69512100  | 0.48346900  |
| H | -5.90794000  | 5.07877100  | -0.28133400 |
| H | -2.88943800  | 4.88737400  | 0.21834700  |
| H | -4.06811500  | 3.60918700  | 0.55532900  |
| H | -4.11790800  | 5.12842000  | 1.47357000  |
| C | -6.25033400  | 2.33332000  | -4.46513100 |
| C | -7.22019800  | 3.18836400  | -5.28775200 |
| H | -7.68664200  | 3.97316500  | -4.67974200 |
| H | -8.00866900  | 2.56438300  | -5.72900400 |
| H | -6.68018300  | 3.68457800  | -6.10465400 |
| C | -5.61087200  | 1.26002600  | -5.34231600 |
| H | -6.83070700  | 1.82422200  | -3.68212100 |
| H | -5.15057500  | 1.69524400  | -6.23674500 |
| H | -6.37232700  | 0.55456600  | -5.69042100 |
| H | -4.83994900  | 0.69542100  | -4.80741900 |
| H | -5.47399600  | 12.45618100 | -6.61231000 |
| H | -7.92712300  | 12.77707100 | -5.33563800 |
| H | -8.57315900  | 1.49098700  | -0.02207900 |
| H | -5.98306700  | 1.51631400  | -1.04530100 |
| C | -8.69905400  | 10.57892300 | -3.93715900 |
| C | -8.49380600  | 10.58625800 | -2.55144400 |
| C | -9.96785600  | 10.45092700 | -4.51543900 |
| C | -9.61839100  | 10.48387100 | -1.73576700 |
| C | -11.06201700 | 10.35503100 | -3.65621300 |
| C | -10.88888200 | 10.37651200 | -2.28083000 |
| H | -9.49367200  | 10.47930900 | -0.65715900 |
| H | -12.06073400 | 10.25328900 | -4.06880700 |

|   |              |             |             |
|---|--------------|-------------|-------------|
| H | -11.75262600 | 10.29599600 | -1.62689700 |
| C | -10.12708200 | 10.31142100 | -6.01701400 |
| C | -9.82389700  | 8.86214800  | -6.41462500 |
| H | -8.82994600  | 8.54172800  | -6.08283900 |
| H | -9.89233800  | 8.73448500  | -7.50129000 |
| H | -10.55499300 | 8.19111000  | -5.94653300 |
| C | -11.50679600 | 10.71809900 | -6.52370300 |
| H | -9.38629900  | 10.96014800 | -6.50543700 |
| H | -12.27475500 | 10.00105500 | -6.21060600 |
| H | -11.51457500 | 10.73245000 | -7.61806200 |
| H | -11.80475900 | 11.71000400 | -6.16697600 |
| C | -7.10553500  | 10.68635300 | -1.95143900 |
| C | -6.72155900  | 12.14785400 | -1.71436500 |
| H | -5.69579500  | 12.22148200 | -1.32769100 |
| H | -7.39199900  | 12.62189100 | -0.98579900 |
| H | -6.77133300  | 12.72808200 | -2.64554500 |
| C | -6.95339800  | 9.84020500  | -0.69039500 |
| H | -6.40396800  | 10.26591700 | -2.67691700 |
| H | -5.89616400  | 9.79288900  | -0.40136700 |
| H | -7.29977900  | 8.81257300  | -0.86829100 |
| H | -7.50404400  | 10.25527400 | 0.16299600  |
| H | -8.34484400  | 8.07579400  | -3.33881900 |
| H | -6.19379700  | 5.93849900  | -3.51232000 |
| H | -9.14995200  | 6.00889100  | -1.97325000 |
| H | -5.35520500  | 7.85290100  | -4.80599300 |



**72. NHC\_Full\_H\_H (planar)-triplet:**

|   |              |             |             |
|---|--------------|-------------|-------------|
| N | -8.46348500  | 3.19616400  | -1.14532900 |
| C | -6.52021200  | 2.31857300  | -1.67095100 |
| C | -7.67232400  | 2.07457600  | -1.01203200 |
| C | -7.84137100  | 4.15468700  | -1.91871100 |
| C | -7.58089500  | 6.52306700  | -3.10995400 |
| C | -7.81498600  | 7.80042100  | -3.54128200 |
| N | -7.46952900  | 10.90303300 | -4.96269800 |
| N | -5.59834500  | 10.22848800 | -5.86156300 |
| C | -6.92402500  | 11.97308900 | -5.64975400 |
| C | -5.76006600  | 11.55701800 | -6.19318300 |
| B | -6.72433000  | 8.42603200  | -4.43198100 |
| B | -8.38294300  | 5.55373100  | -2.23037400 |
| C | -6.65291900  | 9.79346200  | -5.07524400 |
| C | -9.83384800  | 3.26557500  | -0.76130200 |
| C | -10.81059200 | 3.06258500  | -1.74106300 |
| C | -10.14220300 | 3.54583800  | 0.57610200  |

|   |              |             |             |
|---|--------------|-------------|-------------|
| C | -12.14482800 | 3.17920000  | -1.35089700 |
| C | -11.48938700 | 3.63418000  | 0.92060200  |
| C | -12.48054600 | 3.46415300  | -0.03712100 |
| H | -12.92826900 | 3.03892900  | -2.09246200 |
| H | -13.52543400 | 3.54869900  | 0.24817500  |
| H | -11.76914300 | 3.84758300  | 1.94771100  |
| C | -9.03908000  | 3.80640700  | 1.58538000  |
| C | -9.44553900  | 3.47907700  | 3.01871300  |
| H | -9.87211700  | 2.47438300  | 3.10895400  |
| H | -10.18427900 | 4.19510200  | 3.39773300  |
| H | -8.57556000  | 3.54194100  | 3.67987100  |
| C | -8.57889000  | 5.26506000  | 1.48927600  |
| H | -8.18168300  | 3.16854300  | 1.32420900  |
| H | -7.74273900  | 5.45189900  | 2.17490400  |
| H | -9.40171300  | 5.93619800  | 1.76649300  |
| H | -8.26460000  | 5.53292300  | 0.47369300  |
| C | -10.47224500 | 2.70678700  | -3.17741800 |
| C | -11.12487600 | 1.38118600  | -3.57552700 |
| H | -10.82824300 | 1.09922200  | -4.59156400 |
| H | -12.21856000 | 1.45965100  | -3.56393600 |
| H | -10.84229600 | 0.56894200  | -2.89782900 |
| C | -10.89747500 | 3.82031700  | -4.13611600 |
| H | -9.38351800  | 2.58398100  | -3.26363300 |
| H | -10.63496200 | 3.55749500  | -5.16758800 |
| H | -10.41164000 | 4.77079300  | -3.88869900 |
| H | -11.98416900 | 3.97054300  | -4.09529600 |
| C | -4.33975200  | 9.55318600  | -5.89956700 |
| C | -3.41924800  | 9.82301500  | -4.87757100 |
| C | -2.80730900  | 8.05412500  | -6.95731100 |
| C | -1.84097600  | 8.38634100  | -6.01958500 |
| C | -2.15433900  | 9.24335300  | -4.97338300 |
| H | -0.84839300  | 7.94853400  | -6.08415100 |
| H | -1.41435600  | 9.45201200  | -4.20336800 |
| C | -3.79019900  | 10.62995500 | -3.64726900 |

|   |             |             |              |
|---|-------------|-------------|--------------|
| C | -3.89506800 | 9.68315400  | -2.44346600  |
| H | -4.63561400 | 8.88676600  | -2.61501700  |
| H | -4.18085800 | 10.23826800 | -1.53957500  |
| H | -2.92335900 | 9.20609200  | -2.24957900  |
| C | -2.80256800 | 11.75863700 | -3.35944700  |
| H | -4.77701400 | 11.08576300 | -3.80425200  |
| H | -3.13973200 | 12.34443600 | -2.49630300  |
| H | -2.70344400 | 12.43688100 | -4.21333400  |
| H | -1.80517900 | 11.37075000 | -3.12027200  |
| C | -4.08067300 | 8.62585600  | -6.91061000  |
| C | -5.14199700 | 8.19593400  | -7.90164300  |
| C | -5.39658400 | 6.69198300  | -7.76828000  |
| H | -6.21372300 | 6.37530800  | -8.42623500  |
| H | -5.65933200 | 6.43507200  | -6.73558400  |
| H | -4.50319900 | 6.11566100  | -8.04798600  |
| C | -4.74948500 | 8.55427000  | -9.33468800  |
| H | -6.07462900 | 8.71497300  | -7.64627500  |
| H | -4.58335300 | 9.62979000  | -9.45411000  |
| H | -5.52984000 | 8.24851400  | -10.03997700 |
| H | -3.82373800 | 8.04091000  | -9.62390100  |
| H | -2.57407700 | 7.34392400  | -7.74807400  |
| N | -6.62126300 | 3.57591700  | -2.23130200  |
| C | -5.49815400 | 4.31083700  | -2.72595000  |
| C | -5.16235500 | 4.20405800  | -4.08400000  |
| C | -4.85811300 | 5.19879900  | -1.85541100  |
| C | -4.16522500 | 5.04891100  | -4.56980700  |
| C | -3.53422700 | 5.96171800  | -3.73315600  |
| C | -3.86384600 | 6.01873500  | -2.39008700  |
| H | -3.88849900 | 5.01930000  | -5.62062600  |
| H | -2.78493900 | 6.63630100  | -4.13844600  |
| H | -3.35502700 | 6.72740000  | -1.73996900  |
| C | -5.22169500 | 5.34711100  | -0.38920200  |
| C | -5.63510700 | 6.79036100  | -0.08120900  |
| H | -4.78928400 | 7.47917800  | -0.21814900  |

|   |              |             |             |
|---|--------------|-------------|-------------|
| H | -5.96924100  | 6.88353000  | 0.95890500  |
| H | -6.44531500  | 7.12077800  | -0.74301700 |
| C | -4.05077600  | 4.92041000  | 0.49816600  |
| H | -6.07682300  | 4.69355300  | -0.15950900 |
| H | -3.17212500  | 5.55057800  | 0.31219800  |
| H | -3.76040400  | 3.88079100  | 0.31253800  |
| H | -4.31199900  | 5.01983100  | 1.55772200  |
| C | -5.95256100  | 3.29465900  | -5.00783100 |
| C | -7.28967900  | 3.94866800  | -5.38261100 |
| H | -7.94618000  | 4.09488900  | -4.51927400 |
| H | -7.81932100  | 3.33538200  | -6.12207000 |
| H | -7.11537000  | 4.94125100  | -5.82017000 |
| C | -5.19271200  | 2.93875500  | -6.28196600 |
| H | -6.16922600  | 2.36246000  | -4.46302800 |
| H | -5.11560200  | 3.80962800  | -6.94619800 |
| H | -5.73022700  | 2.16266800  | -6.83563300 |
| H | -4.17939800  | 2.57665700  | -6.07756700 |
| H | -5.02901100  | 12.08064500 | -6.78760100 |
| H | -7.42889400  | 12.92544700 | -5.68941400 |
| H | -8.01688900  | 1.20799000  | -0.47104600 |
| H | -5.62748200  | 1.72602800  | -1.79146000 |
| C | -8.65584900  | 10.97759300 | -4.17260900 |
| C | -8.54736400  | 10.97424700 | -2.77365400 |
| C | -9.89220000  | 11.04326900 | -4.83159500 |
| C | -9.72614000  | 11.06687300 | -2.03596400 |
| C | -11.04064500 | 11.15301900 | -4.04958700 |
| C | -10.95764800 | 11.16896600 | -2.66503600 |
| H | -9.67720500  | 11.05694600 | -0.95145400 |
| H | -12.01330200 | 11.20844200 | -4.52814200 |
| H | -11.86355200 | 11.24673100 | -2.07044600 |
| C | -9.97447900  | 10.86517500 | -6.33550600 |
| C | -9.85448200  | 9.37012400  | -6.65681200 |
| H | -8.93456700  | 8.93319200  | -6.25115800 |
| H | -9.87373000  | 9.20082700  | -7.73974400 |

|   |              |             |             |
|---|--------------|-------------|-------------|
| H | -10.69920200 | 8.82851800  | -6.21295700 |
| C | -11.24900100 | 11.43244700 | -6.95097800 |
| H | -9.12118900  | 11.38139000 | -6.79699600 |
| H | -12.12834800 | 10.84441800 | -6.66288000 |
| H | -11.18653100 | 11.39477800 | -8.04299600 |
| H | -11.42567700 | 12.47214800 | -6.65508400 |
| C | -7.20004900  | 10.88129100 | -2.08555200 |
| C | -6.55418400  | 12.26478100 | -1.97795200 |
| H | -5.55401400  | 12.19107800 | -1.52898200 |
| H | -7.15767600  | 12.93167500 | -1.34891600 |
| H | -6.44587400  | 12.73610800 | -2.96339000 |
| C | -7.26954800  | 10.18763400 | -0.72917100 |
| H | -6.55377700  | 10.25772700 | -2.71295700 |
| H | -6.25644700  | 9.96188400  | -0.37438800 |
| H | -7.81666600  | 9.23954400  | -0.80371700 |
| H | -7.74975500  | 10.81009300 | 0.03643200  |
| H | -8.74284100  | 8.29589700  | -3.22787300 |
| H | -6.64179600  | 6.15150100  | -3.51969900 |
| H | -9.44500600  | 5.81956400  | -1.74369300 |
| H | -5.77888500  | 7.73382700  | -4.69440000 |
